# Supplementary material for: Oritatami: A Computational Model for Molecular Co-Transcriptional Folding
Source: MDPI journal article supplement (doi:10.3390/ijms20092259), 2019-05-07
Supplement: s2 [file s2]

The logo features the text "Zig 0+0" in a bold, black, stylized font with a white outline. The text is centered within a light blue, jagged-edged shape that resembles a lightning bolt or a stylized speech bubble. This shape has a thick black border and contains several darker blue, wavy, vertical stripes. The entire graphic is set against a solid black background.

**Zig 0+0**
