# Supplementary material for: Oritatami: A Computational Model for Molecular Co-Transcriptional Folding
Source: MDPI journal article supplement (doi:10.3390/ijms20092259), 2019-05-07
Supplement: s2 [file s2]

The logo consists of a stylized, jagged, light blue shape with a black outline, resembling a zigzag or a lightning bolt. Inside this shape, the text "Zigzag" is written in a bold, black, sans-serif font. The letters are slightly tilted to the right, matching the overall slanted orientation of the shape. The background is white.

**Zigzag**
