# Supplementary material for: Oritatami: A Computational Model for Molecular Co-Transcriptional Folding
Source: MDPI journal article supplement (doi:10.3390/ijms20092259), 2019-05-07
Supplement: s2 [file s2]

| ← |     | 10     | 9          | 8   | 7   | 6         | 5          | 4   | 3   | 2         | 1          | 0   |    |
|---|-----|--------|------------|-----|-----|-----------|------------|-----|-----|-----------|------------|-----|----|
| → |     |        | 11         | 12  | 13  | 14        | 15         | 16  | 17  | 18        | 19         | 20  |    |
| → |     | BT*    | C0*        | D2* | A0* | B2*       | C0*        | D2* | A0* | B2*       | C0*        | DT* |    |
| ← |     | BT     | <u>A00</u> | D0  | C00 | B0        | <u>A00</u> | D0  | C00 | <u>B0</u> | <u>A01</u> |     |    |
| → | 10  |        |            | C0  | D2  | <u>A0</u> | B2         | C0  | D2  | A0        | B2         | C1  | DT |
| ← |     | BT     | <u>A00</u> | D0  | C00 | B0        | <u>A00</u> | D0  | C01 | <u>B1</u> | <u>A11</u> |     |    |
| → | 30  |        |            | C0  | D2  | A0        | B2         | C0  | D2  | <u>A1</u> | B2         | C0  | DT |
| ← |     | BT     | <u>A00</u> | D0  | C00 | B0        | <u>A00</u> | D0  | C10 | <u>B0</u> | A01        |     |    |
| → | 50  |        |            | C0  | D2  | A0        | B2         | C0  | D2  | <u>A1</u> | B2         | C1  | DT |
| ← |     | BT     | <u>A00</u> | D0  | C00 | <u>B0</u> | <u>A01</u> | D1  | C11 | <u>B1</u> | A11        |     |    |
| → | 70  |        |            | C0  | D2  | A0        | B2         | C1  | D2  | <u>A0</u> | B2         | C0  | DT |
| ← |     | BT     | <u>A00</u> | D0  | C00 | <u>B0</u> | <u>A10</u> | D0  | C00 | B0        | A01        |     |    |
| → | 90  |        |            | C0  | D2  | A0        | B2         | C1  | D2  | A0        | B2         | C1  | DT |
| ← |     | BT     | <u>A00</u> | D0  | C00 | B0        | A10        | D0  | C01 | B1        | A11        |     |    |
| → | 110 |        |            | C0  | D2  | A0        | B2         | C1  | D2  | A1        | B2         | C0  | DT |
| ← |     | BT     | <u>A00</u> | D0  | C00 | B0        | A10        | D0  | C10 | B0        | A01        |     |    |
| → | 130 |        |            | C0  | D2  | A0        | B2         | C1  | D2  | A1        | B2         | C1  | DT |
| ← |     | BT     | <u>A00</u> | D0  | C01 | B1        | <u>A11</u> | D1  | C11 | B1        | A11        |     |    |
|   | 150 |        |            | C0  | D2  | A1        | B2         | C0  | D2  | A0        | B2         | C0  | DT |
|   |     | BT     | <u>A00</u> | D0  | C10 | <u>B0</u> | <u>A00</u> | D0  | C00 | B0        | A11        |     |    |
| → | 170 |        |            | C0  | D2  | A1        | B2         | C0  | D2  | A0        | B2         | C1  | DT |
| ← |     | BT     | <u>A00</u> | D0  | C10 | B0        | <u>A00</u> | D0  | C01 | B1        | A11        |     |    |
| → | 190 |        |            | C0  | D2  | A1        | B2         | C0  | D2  | A1        | B2         | C0  | DT |
| ← |     | BT     | <u>A00</u> | D0  | C10 | B0        | <u>A00</u> | D0  | C10 | B0        | A01        |     |    |
| → | 210 |        |            | C0  | D2  | A1        | B2         | C0  | D2  | A1        | B2         | C1  | DT |
| ← |     | BT     | <u>A00</u> | D0  | C10 | B0        | A01        | D1  | C11 | B1        | A11        |     |    |
| → | 230 |        |            | C0  | D2  | A1        | B2         | C1  | D2  | A0        | B2         | C0  | DT |
| ← |     | BT     | <u>A00</u> | D0  | C10 | <u>B0</u> | A10        | D0  | C00 | B0        | A01        |     |    |
| → | 250 |        |            | C0  | D2  | A1        | B2         | C1  | D2  | A0        | B2         | C1  | DT |
| ← |     | BT     | <u>A00</u> | D0  | C10 | B0        | A10        | D0  | C01 | B1        | A11        |     |    |
| → | 270 |        |            | C0  | D2  | A1        | B2         | C1  | D2  | A1        | B2         | C0  | DT |
| ← |     | BT     | <u>A00</u> | D0  | C10 | B0        | A10        | D0  | C10 | B0        | A01        |     |    |
| → | 290 |        |            | C0  | D2  | A1        | B2         | C1  | D2  | A1        | B2         | C1  | DT |
| ← |     | BT     | <u>A01</u> | D1  | C11 | B1        | A11        | D1  | C11 | B1        | A11        |     |    |
|   | 310 |        |            | C1  | D2  | A0        | B2         | C0  | D2  | A0        | B2         | C0  | DT |
|   |     | BT     | <u>A10</u> | D0  | C00 | B0        | A00        | D0  | C00 | B0        | A01        |     |    |
| → | 330 |        |            | C1  | D2  | A0        | B2         | C0  | D2  | A0        | B2         | C1  | DT |
| ← |     | BT     | A10        | D0  | C00 | B0        | A00        | D0  | C01 | B1        | A11        |     |    |
| → | 350 |        |            | C1  | D2  | A0        | B2         | C0  | D2  | A1        | B2         | C0  | DT |
| ← |     | BT     | A10        | D0  | C00 | B0        | A00        | D0  | C10 | B0        | A01        |     |    |
| → | 370 |        |            | C1  | D2  | A0        | B2         | C0  | D2  | A1        | B2         | C1  | DT |
| ← |     | BT     | A10        | D0  | C00 | B0        | A01        | D1  | C11 | B1        | A11        |     |    |
| → | 390 |        |            | C1  | D2  | A0        | B2         | C1  | D2  | A0        | B2         | C0  | DT |
| ← |     | BT     | A10        | D0  | C00 | B0        | A10        | D0  | C00 | B0        | A01        |     |    |
| → | 410 |        |            | C1  | D2  | A0        | B2         | C1  | D2  | A0        | B2         | C1  | DT |
| ← |     | BT     | A10        | D0  | C00 | B0        | A10        | D0  | C01 | B1        | A11        |     |    |
| → | 430 |        |            | C1  | D2  | A0        | B2         | C1  | D2  | A1        | B2         | C0  | DT |
| ← |     | BT     | A10        | D0  | C00 | B0        | A10        | D0  | C10 | B0        | A01        |     |    |
| → | 450 |        |            | C1  | D2  | A0        | B2         | C1  | D2  | A1        | B2         | C1  | DT |
| ← |     | BT     | A10        | D0  | C01 | B1        | A11        | D1  | C11 | B1        | A11        |     |    |
|   | 470 |        |            | C1  | D2  | A1        | B2         | C0  | D2  | A0        | B2         | C0  | DT |
|   |     | BT     | A10        | D0  | C10 | B0        | A00        | D0  | C00 | B0        | A01        |     |    |
| → | 490 |        |            | C1  | D2  | A1        | B2         | C0  | D2  | A0        | B2         | C1  | DT |
| ← |     | BT     | A10        | D0  | C10 | B0        | A00        | D0  | C01 | B1        | A11        |     |    |
| → | 510 |        |            | C1  | D2  | A1        | B2         | C0  | D2  | A1        | B2         | C0  | DT |
| ← |     | BT     | A10        | D0  | C10 | B0        | A00        | D0  | C10 | B0        | A01        |     |    |
| → | 530 |        |            | C1  | D2  | A1        | B2         | C0  | D2  | A1        | B2         | C1  | DT |
| ← |     | BT     | A10        | D0  | C10 | B0        | A01        | D1  | C11 | B1        | A11        |     |    |
| → | 550 |        |            | C1  | D2  | A1        | B2         | C1  | D2  | A0        | B2         | C0  | DT |
| ← |     | BT     | A10        | D0  | C10 | B0        | A10        | D0  | C00 | B0        | A01        |     |    |
| → | 570 |        |            | C1  | D2  | A1        | B2         | C1  | D2  | A0        | B2         | C1  | DT |
| ← |     | BT     | A10        | D0  | C10 | B0        | A10        | D0  | C01 | B1        | A11        |     |    |
| → | 590 |        |            | C1  | D2  | A1        | B2         | C1  | D2  | A1        | B2         | C0  | DT |
| ← |     | BT     | A10        | D0  | C10 | B0        | A10        | D0  | C10 | B0        | A01        |     |    |
| → | 610 |        |            | C1  | D2  | A1        | B2         | C1  | D2  | A1        | B2         | C1  | DT |
| ← | 630 | B-Halt | <u>A11</u> | D1  | C11 | B1        | A11        | D1  | C11 | B1        | A11        |     |    |
|   |     |        |            |     |     |           |            |     |     |           |            |     |    |
|   |     |        |            |     |     |           |            |     |     |           |            |     |    |
