# Supplementary material for: Oritatami: A Computational Model for Molecular Co-Transcriptional Folding
Source: MDPI journal article supplement (doi:10.3390/ijms20092259), 2019-05-07
Supplement: s2 [file s2]

The logo features the word "Zigpado" in a bold, black, stylized font with a white outline. The text is centered within a light pink parallelogram that has a thick black border. Behind the text, there are three dark red, stylized, overlapping shapes that resemble the letter 'Z' or 'G', creating a layered effect.

**Zigpado**
