# Supplementary material for: Oritatami: A Computational Model for Molecular Co-Transcriptional Folding
Source: MDPI journal article supplement (doi:10.3390/ijms20092259), 2019-05-07
Supplement: s2 [file s2]

The logo features the word "Zag 1" in a bold, black, stylized font with a white outline. The text is centered within a large, light blue, stylized letter "Z" that has a 3D effect, with a darker blue shadow on its right side. The entire graphic is set against a white background.

**Zag 1**
