# Supplementary figures and images for: Oritatami: A Computational Model for Molecular Co-Transcriptional Folding (part 1 of 2)
Source: MDPI journal article supplement (doi:10.3390/ijms20092259), 2019-05-07

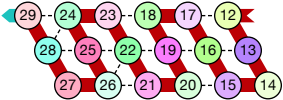

Supplement: s2 [file s2]

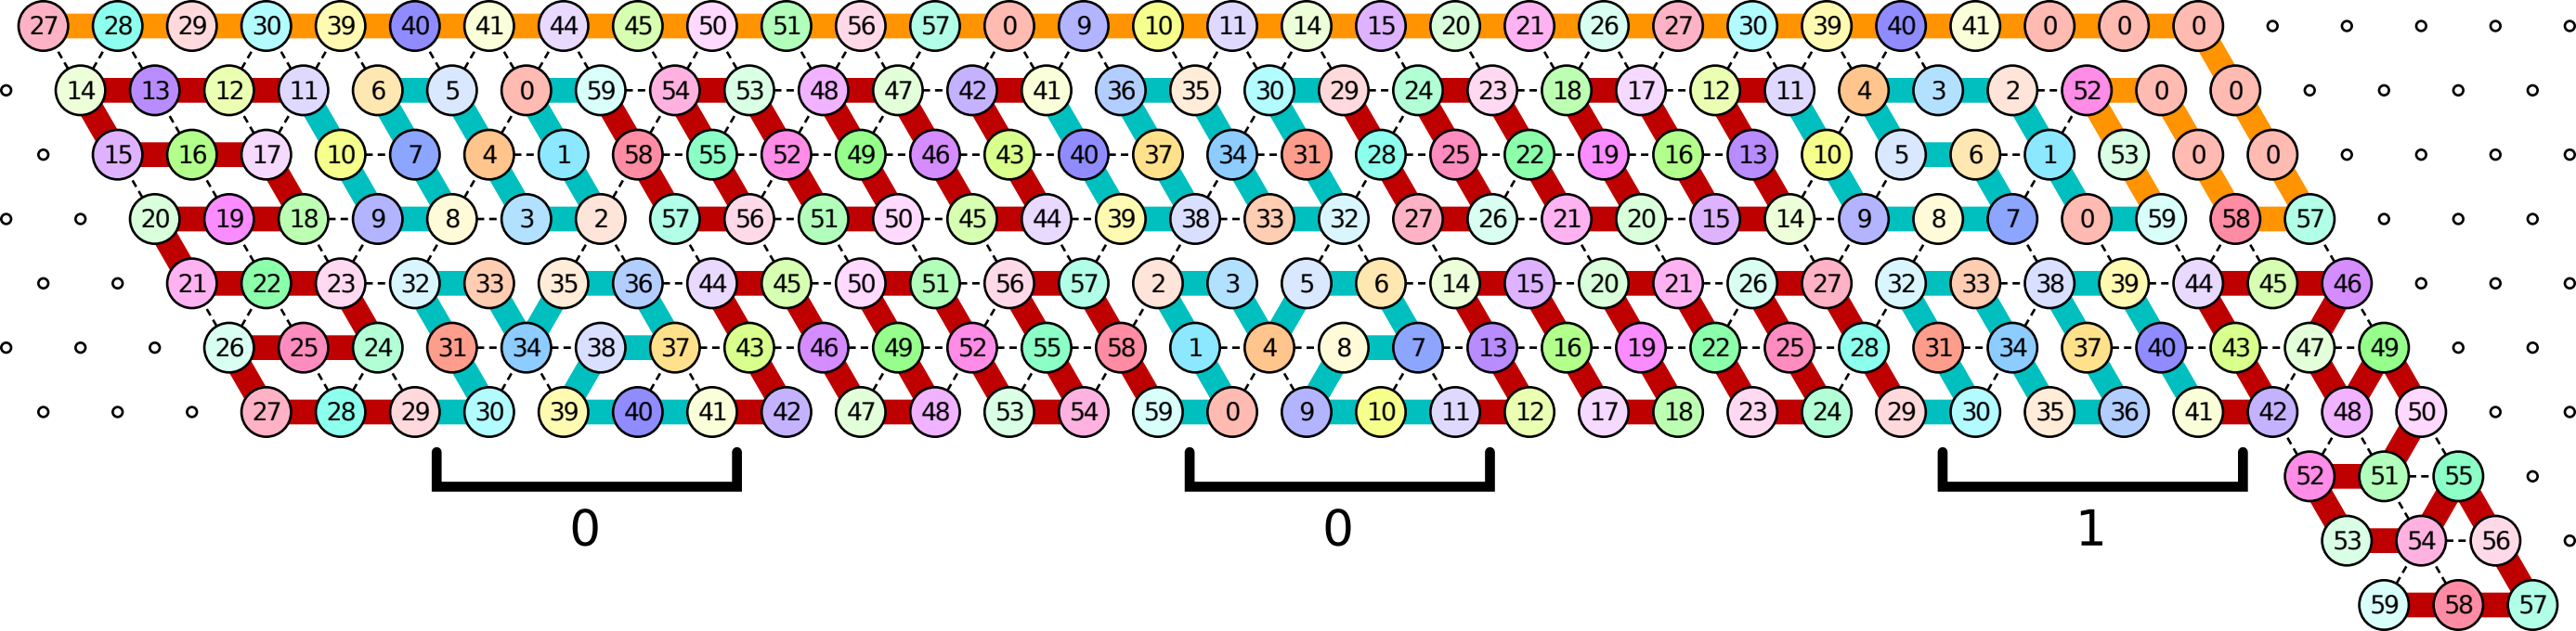

Supplement: s2 [file s2]

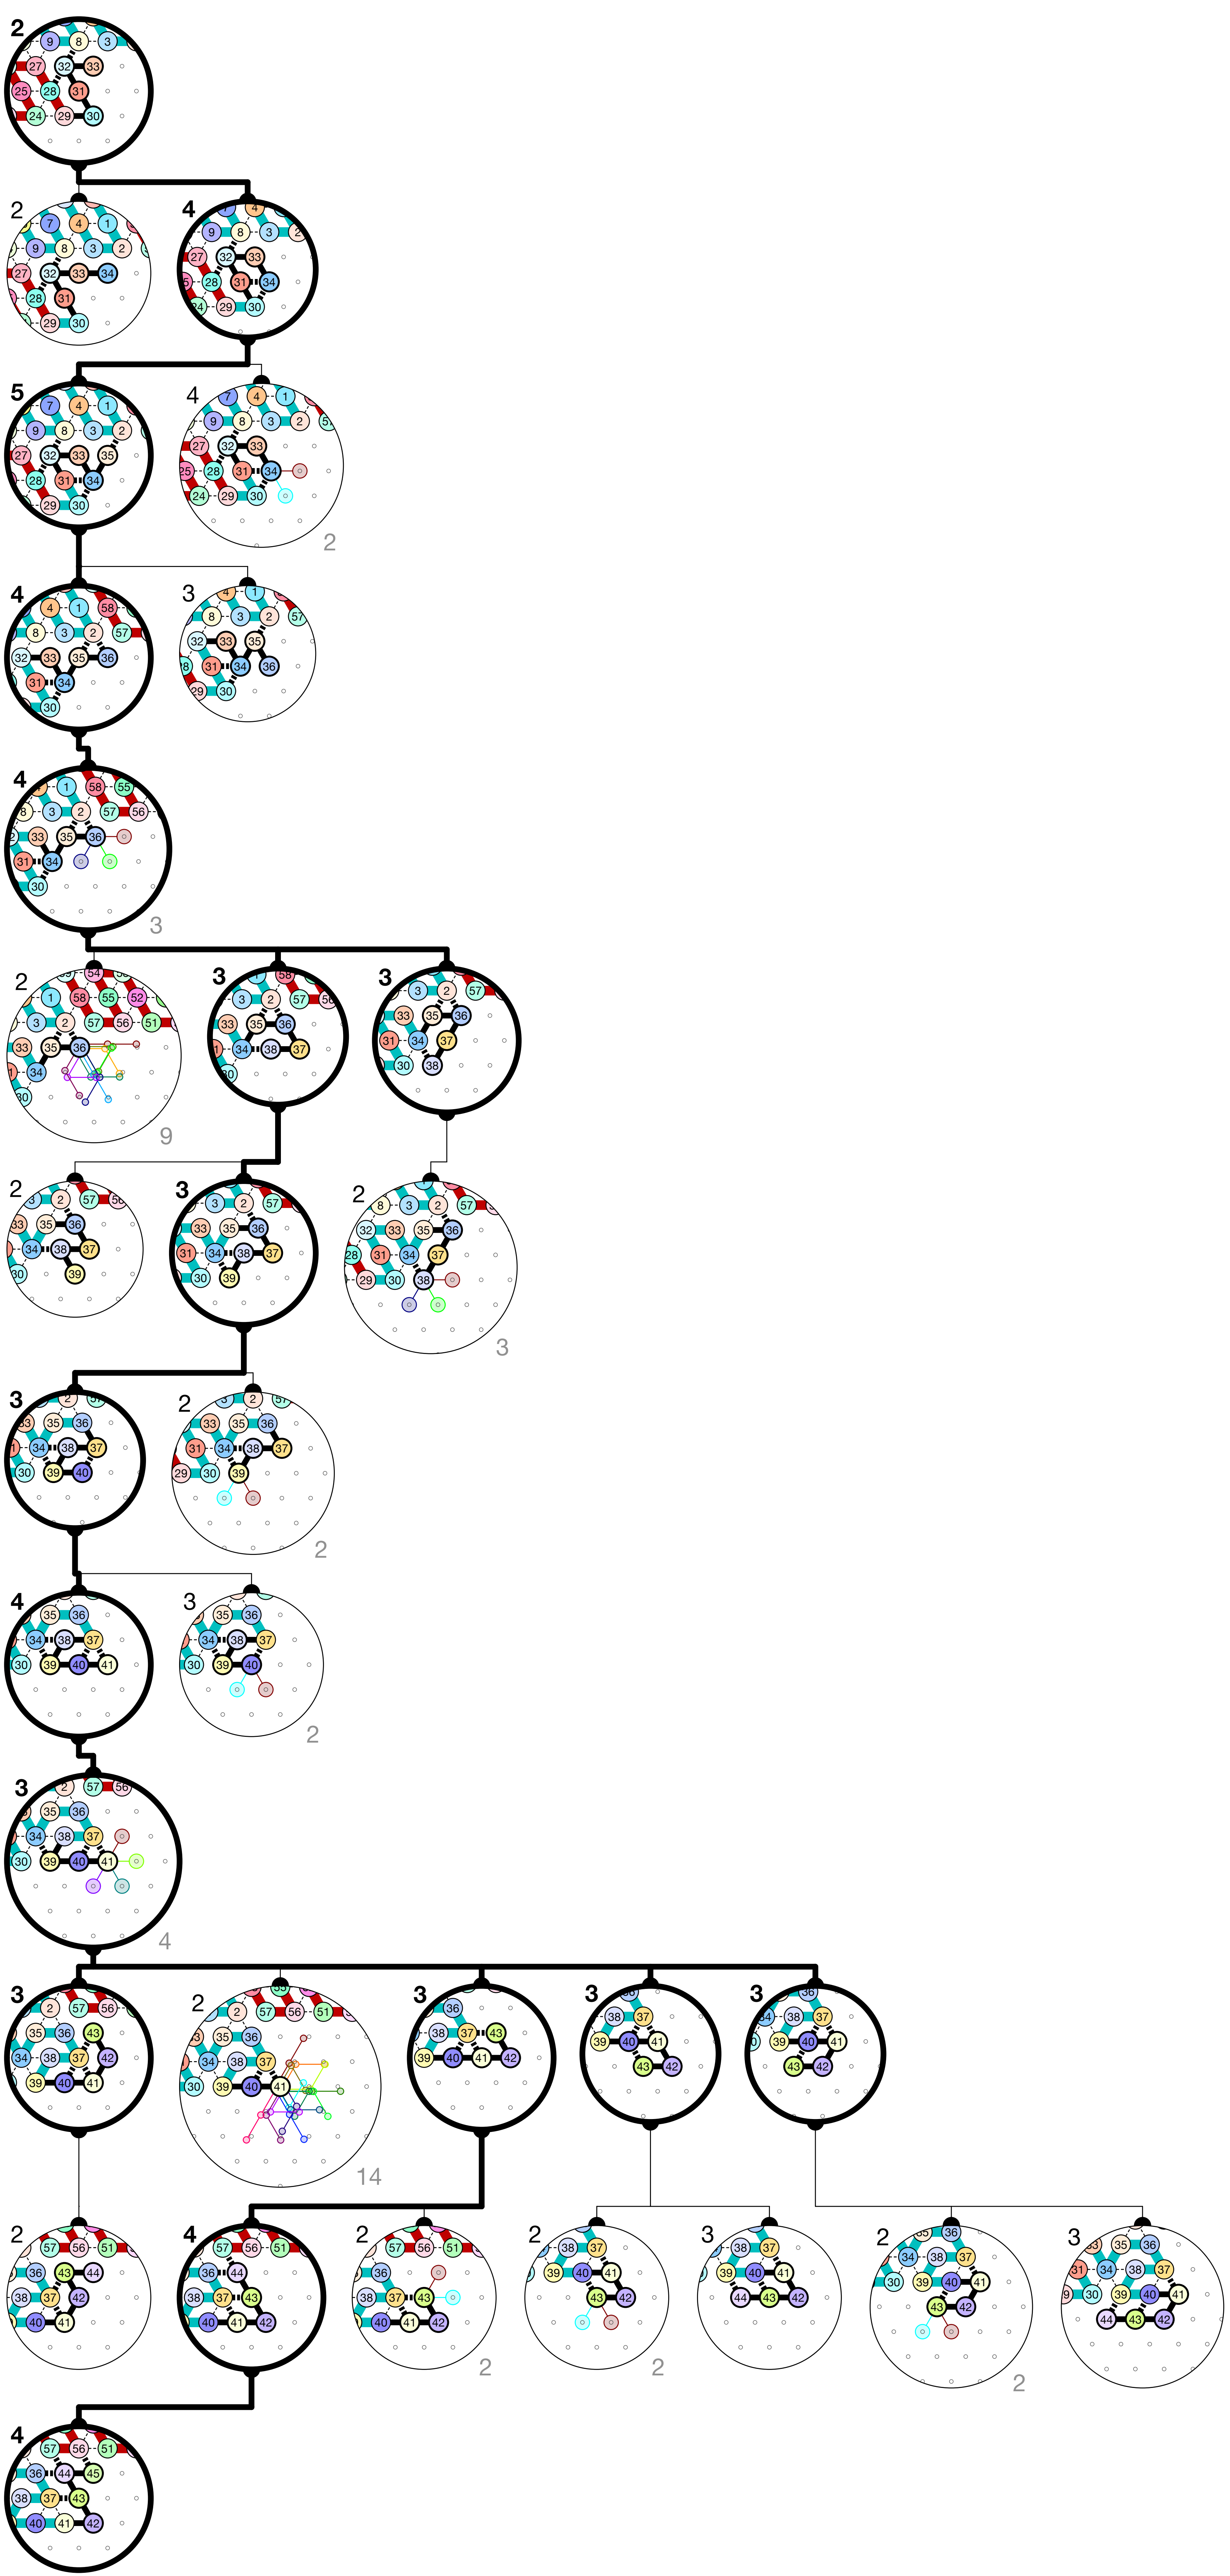

Supplement: s2 [file s2]

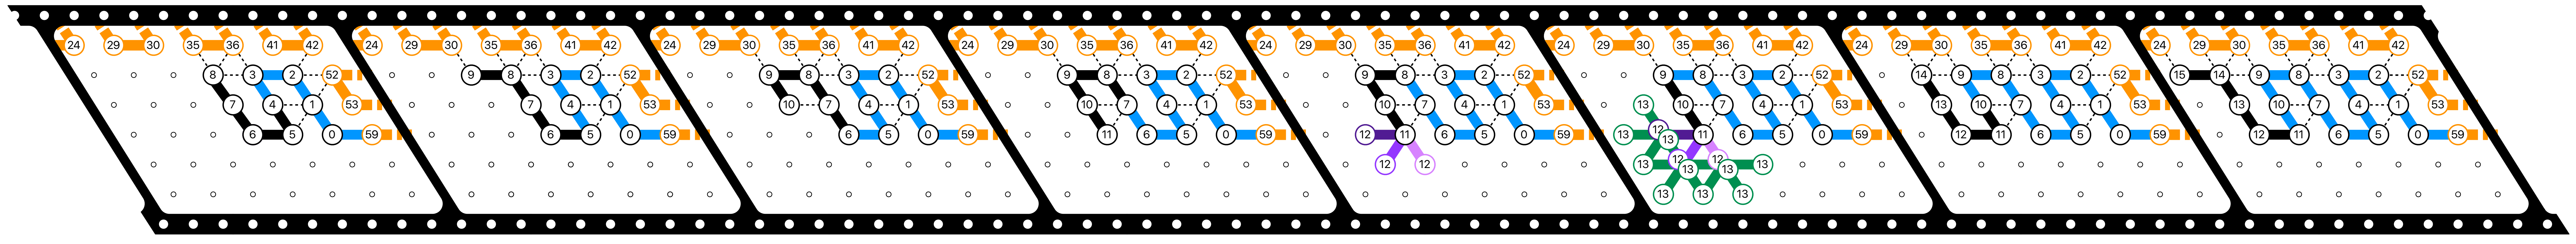

Supplement: s2 [file s2]

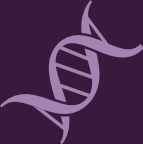

# International Journal of *Molecular Sciences*

Supplement: s2 [file s2]

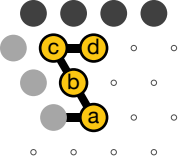

Supplement: s2 [file s2]

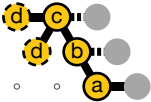

Supplement: s2 [file s2]

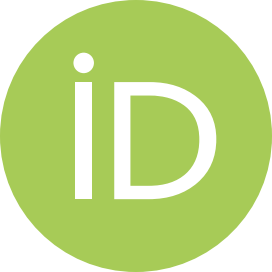

Supplement: s2 [file s2]

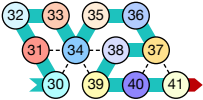

Supplement: s2 [file s2]

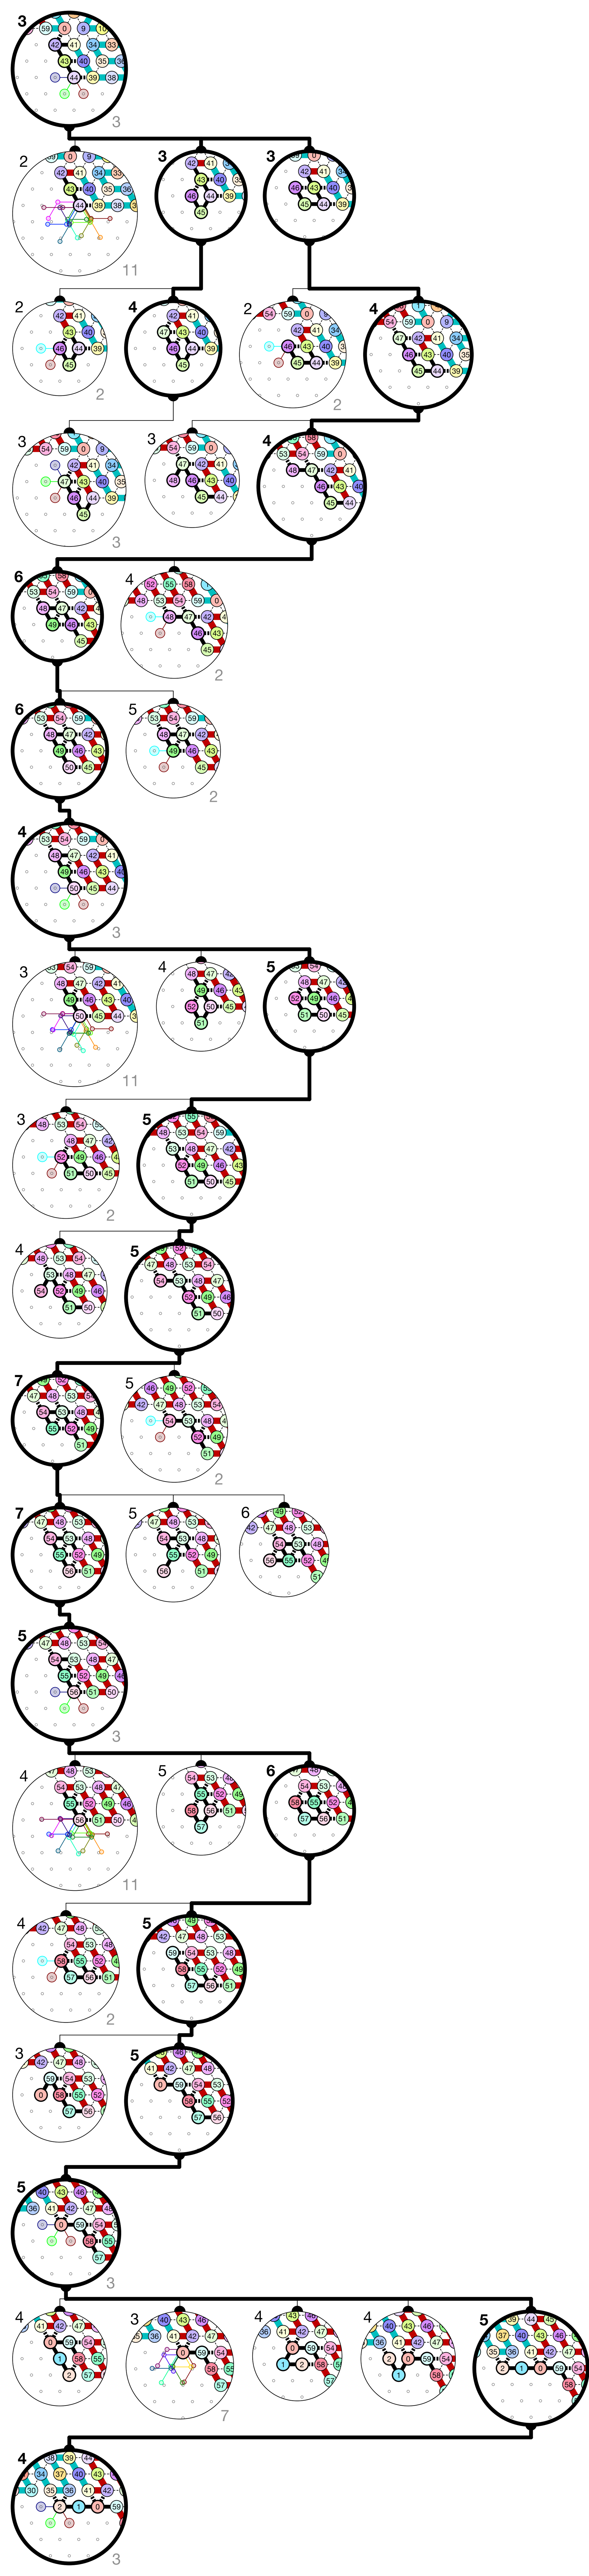

Supplement: s2 [file s2]

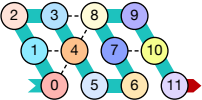

Supplement: s2 [file s2]

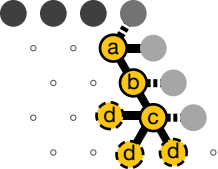

Supplement: s2 [file s2]

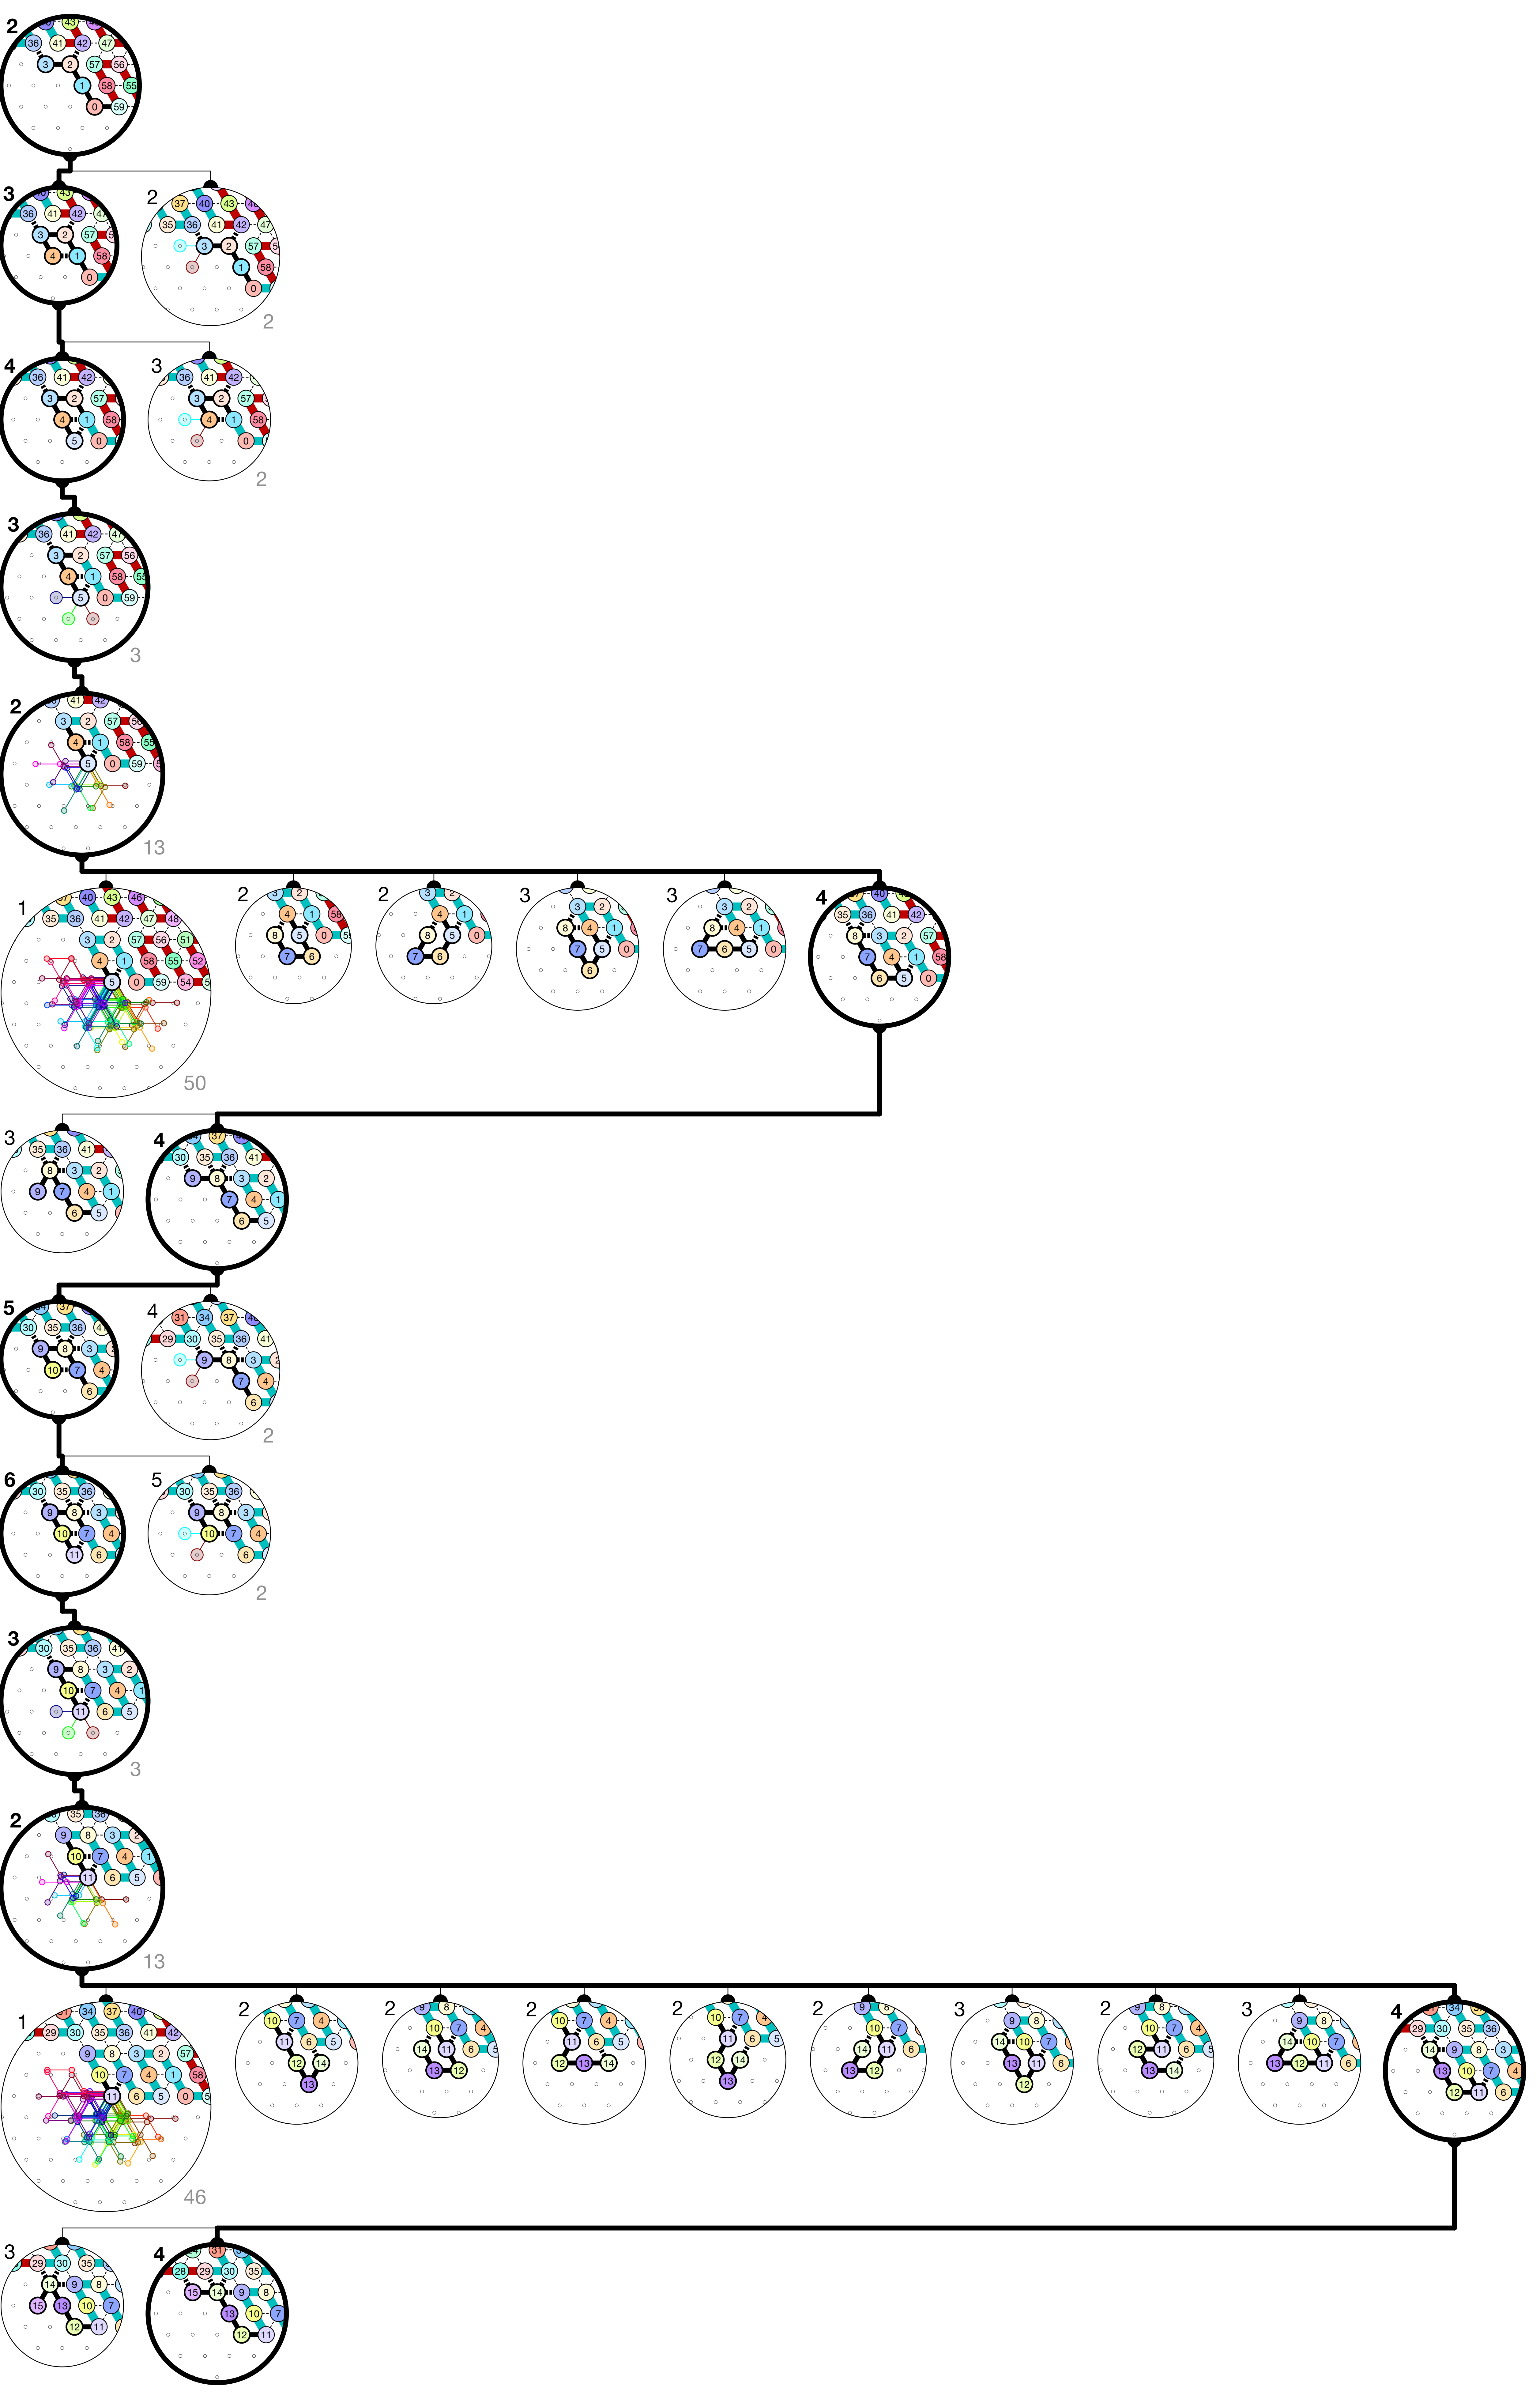

Supplement: s2 [file s2]

0

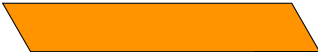

No carry

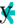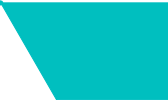

1

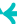

Carry

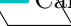

Supplement: s2 [file s2]

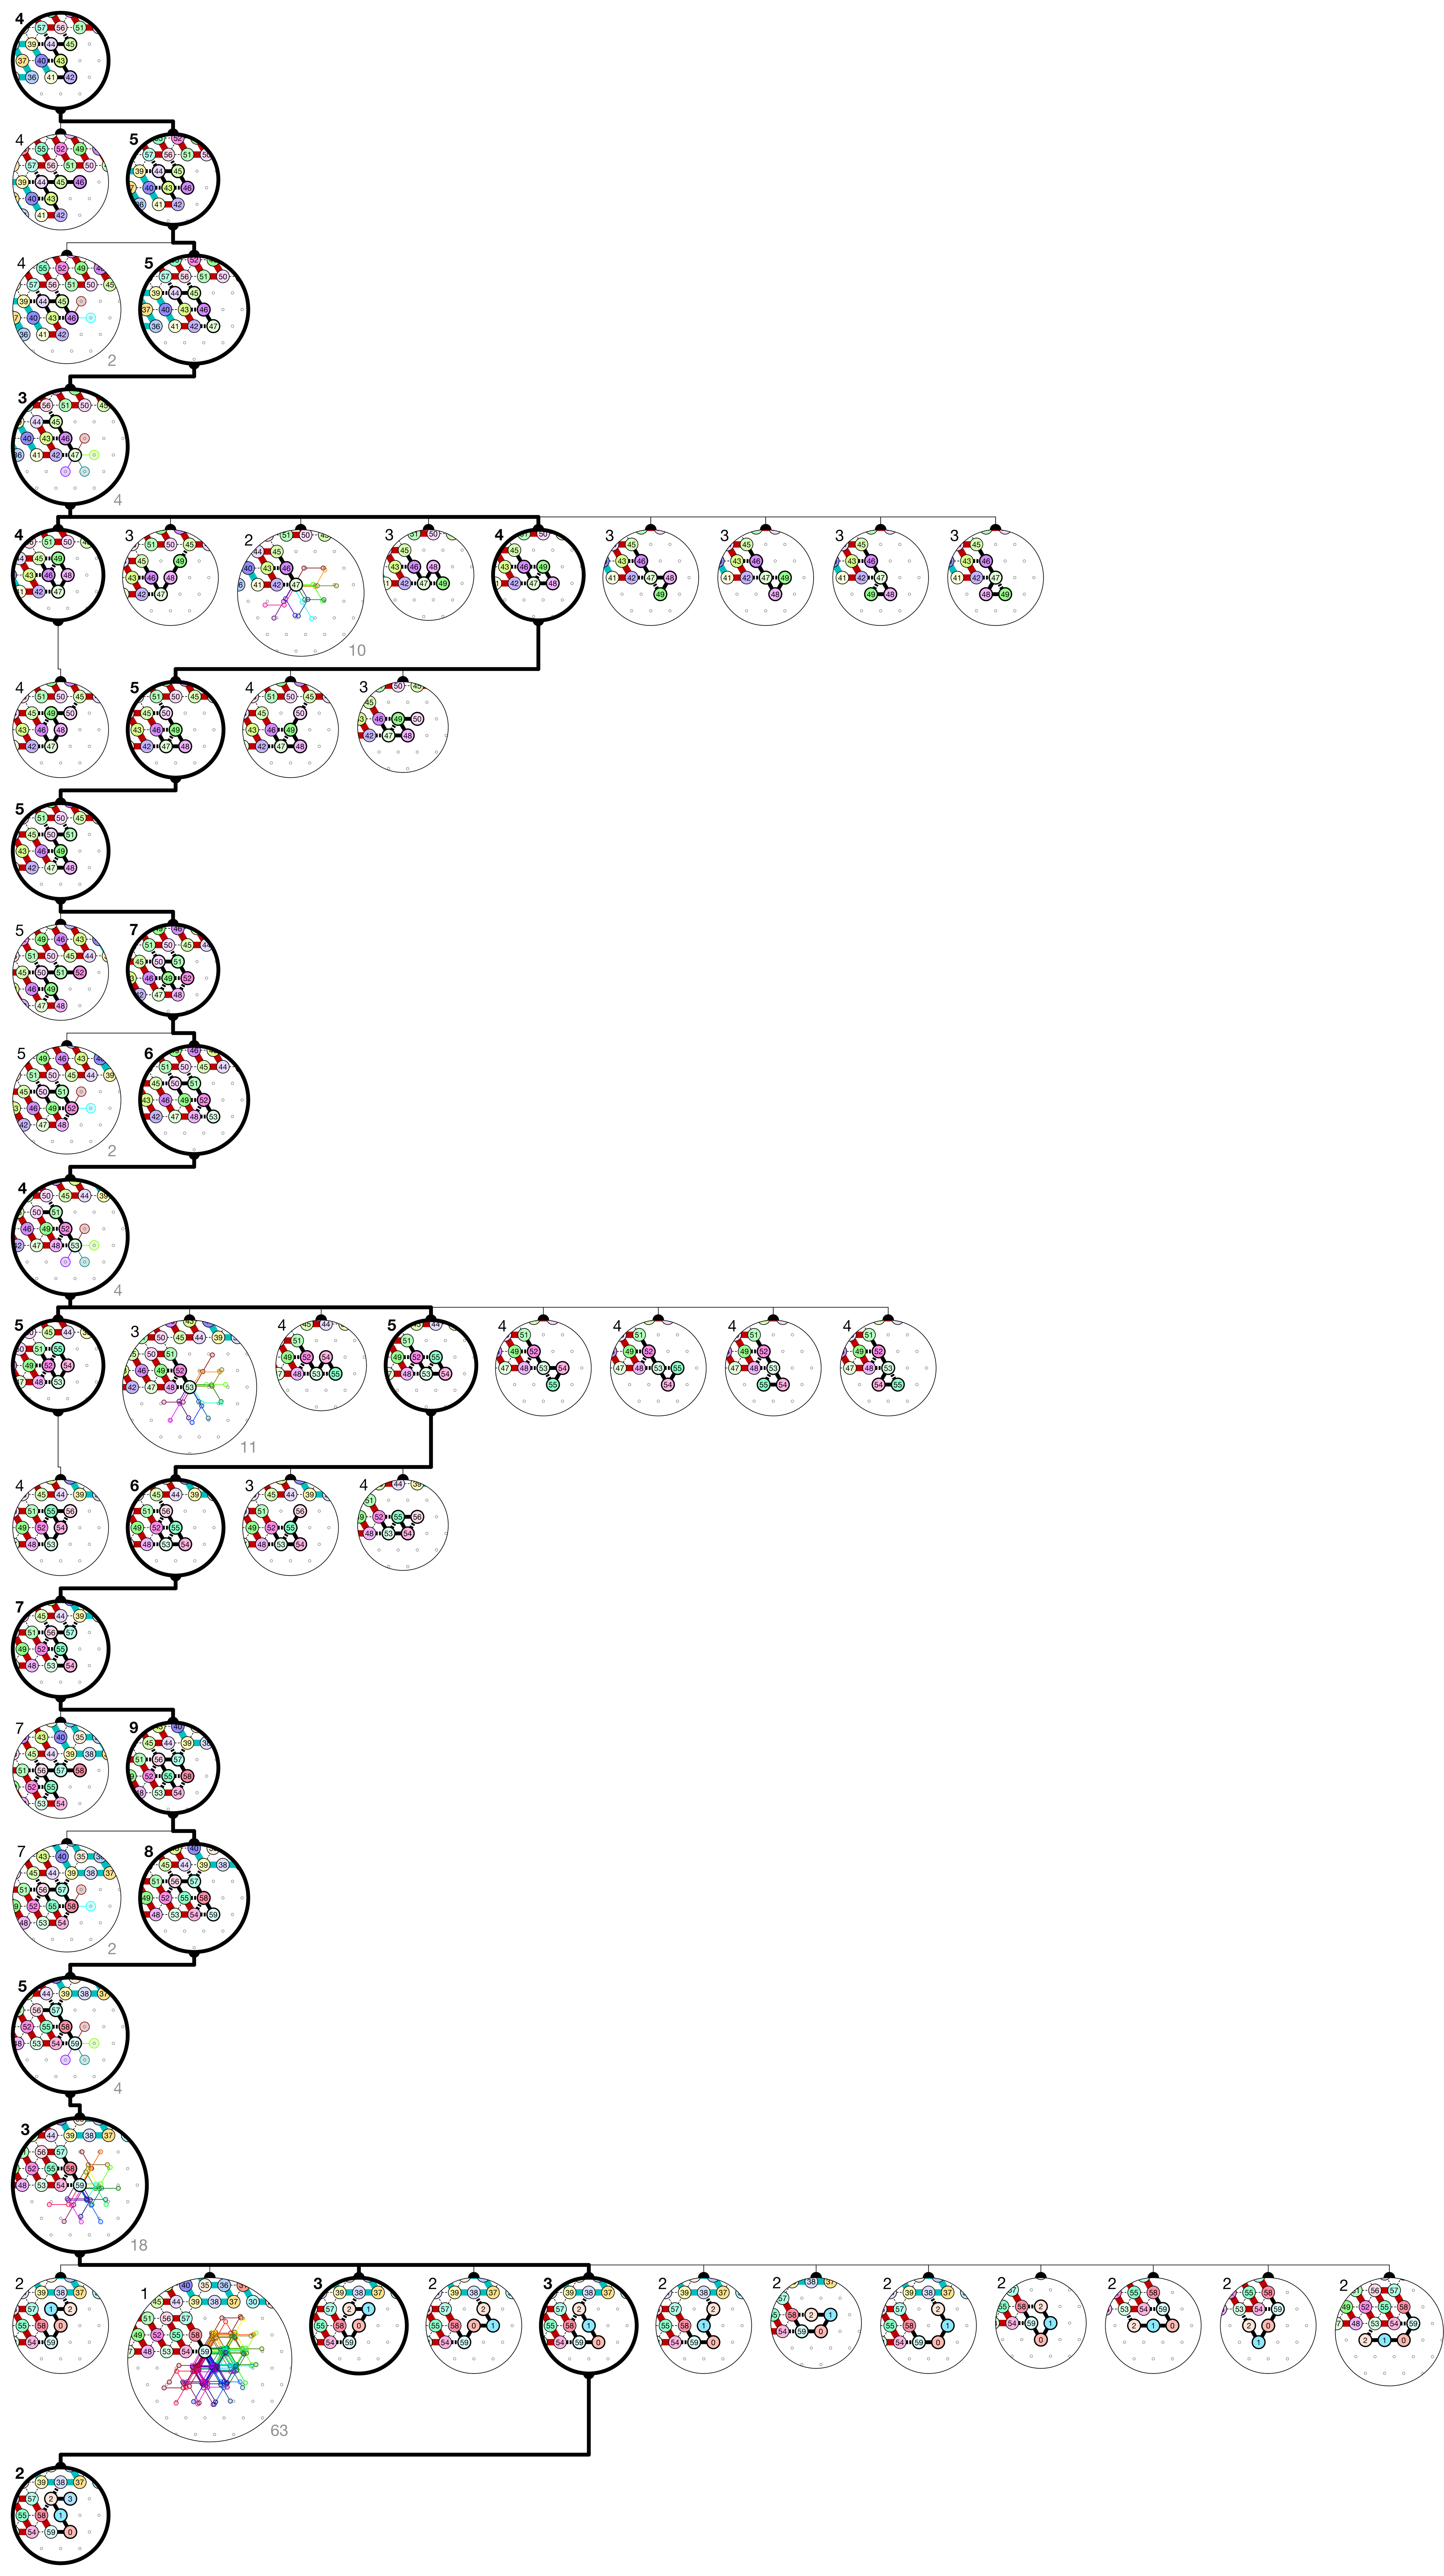

Supplement: s2 [file s2]

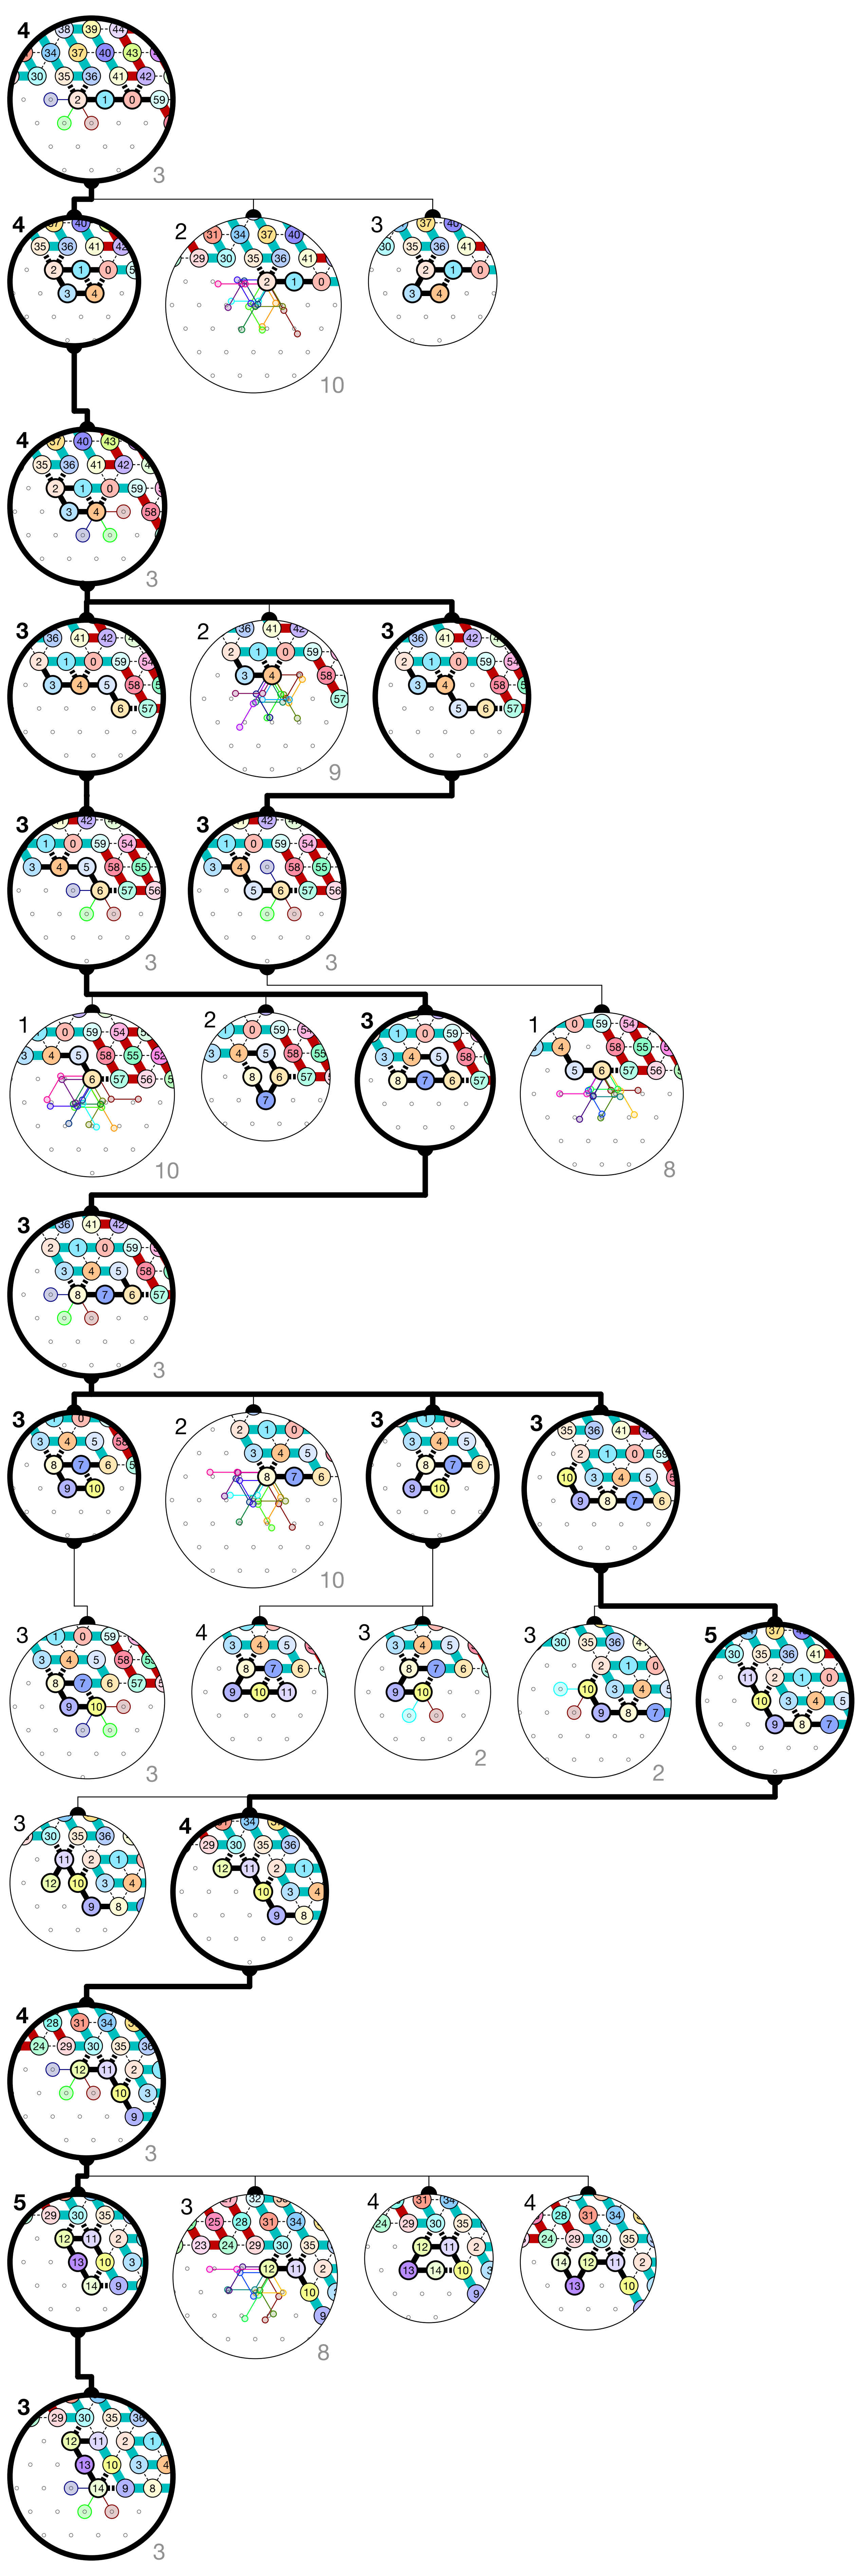

Supplement: s2 [file s2]

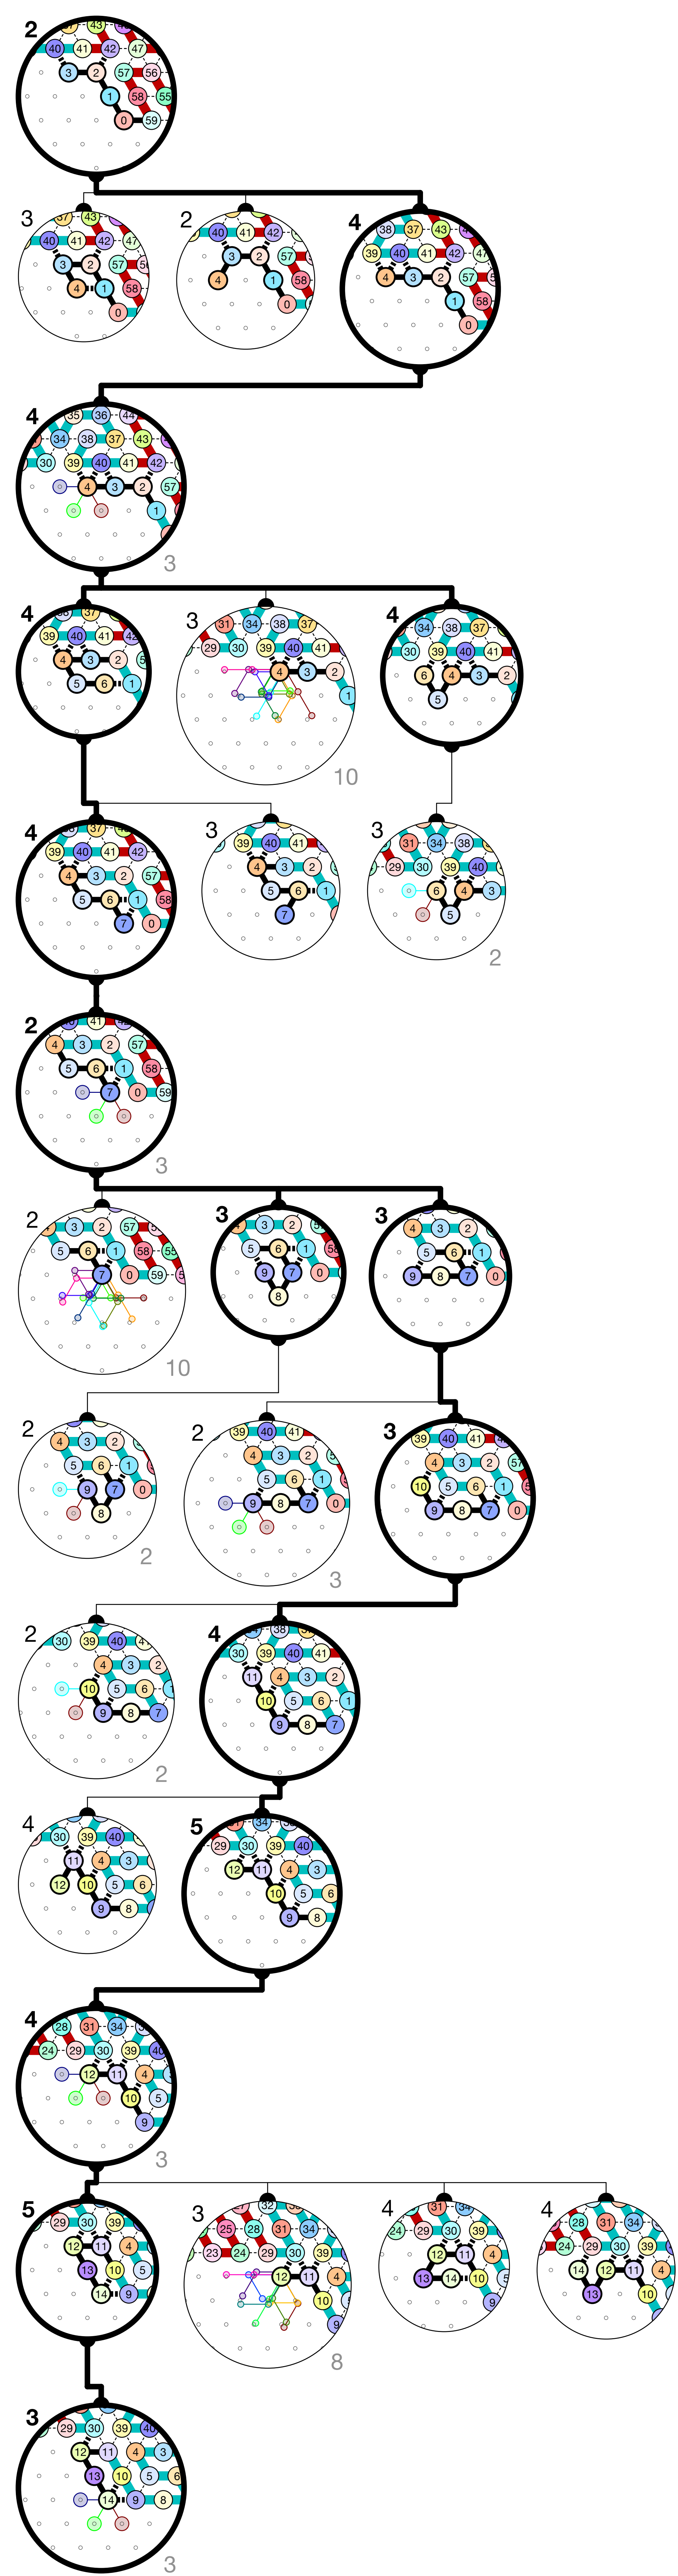

Supplement: s2 [file s2]

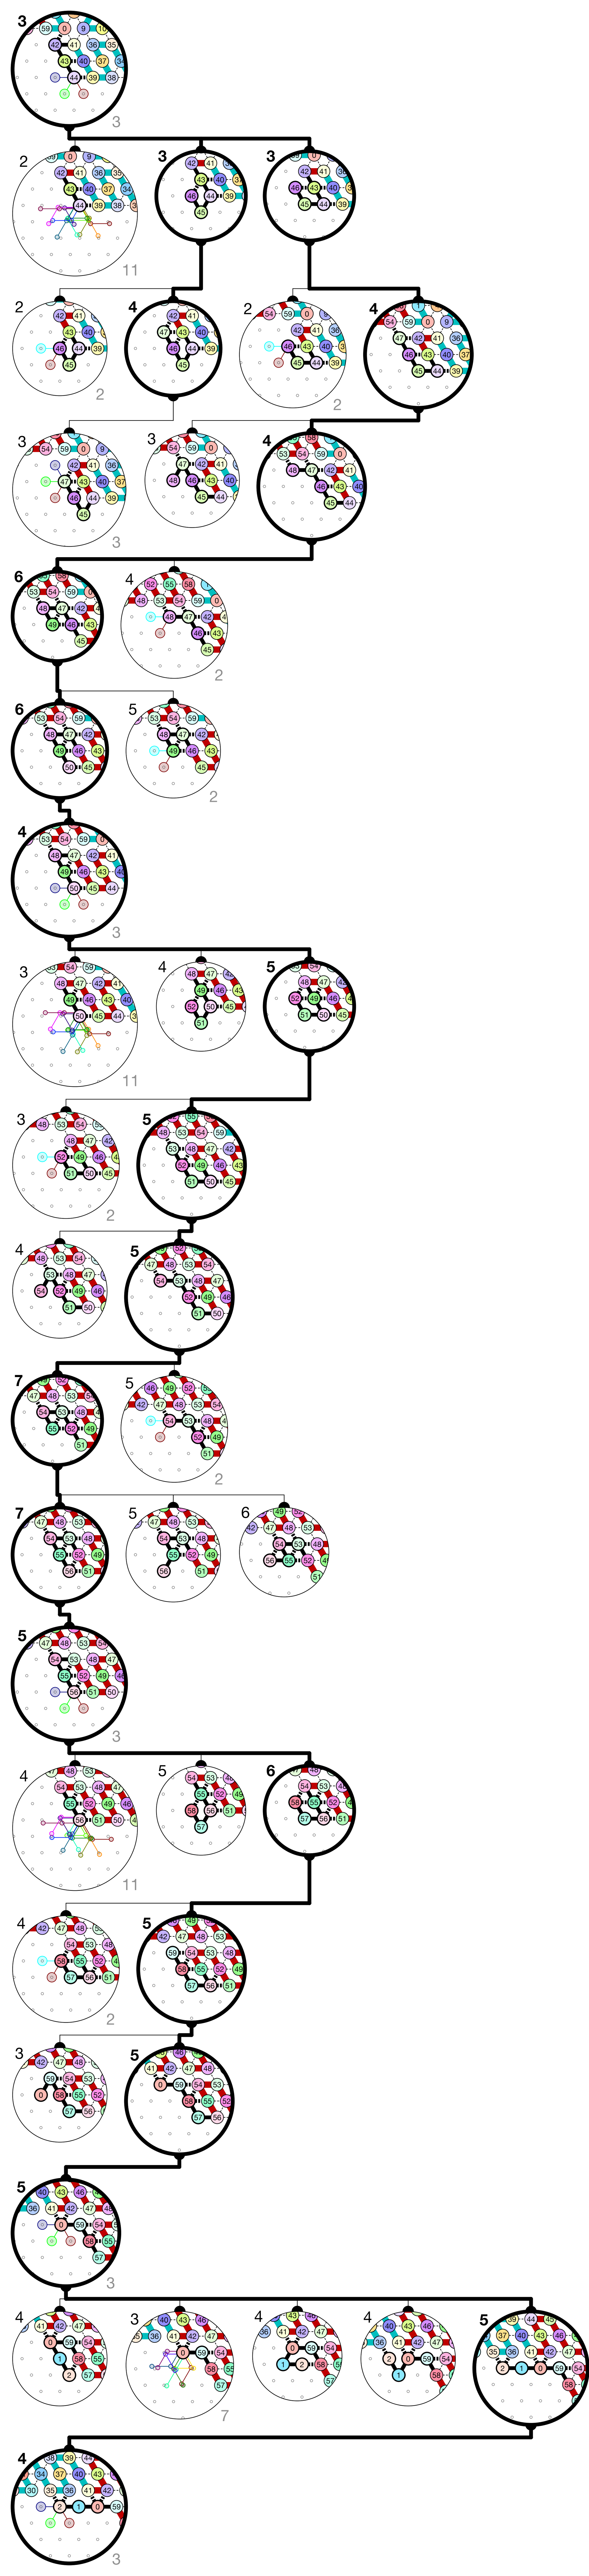

Supplement: s2 [file s2]

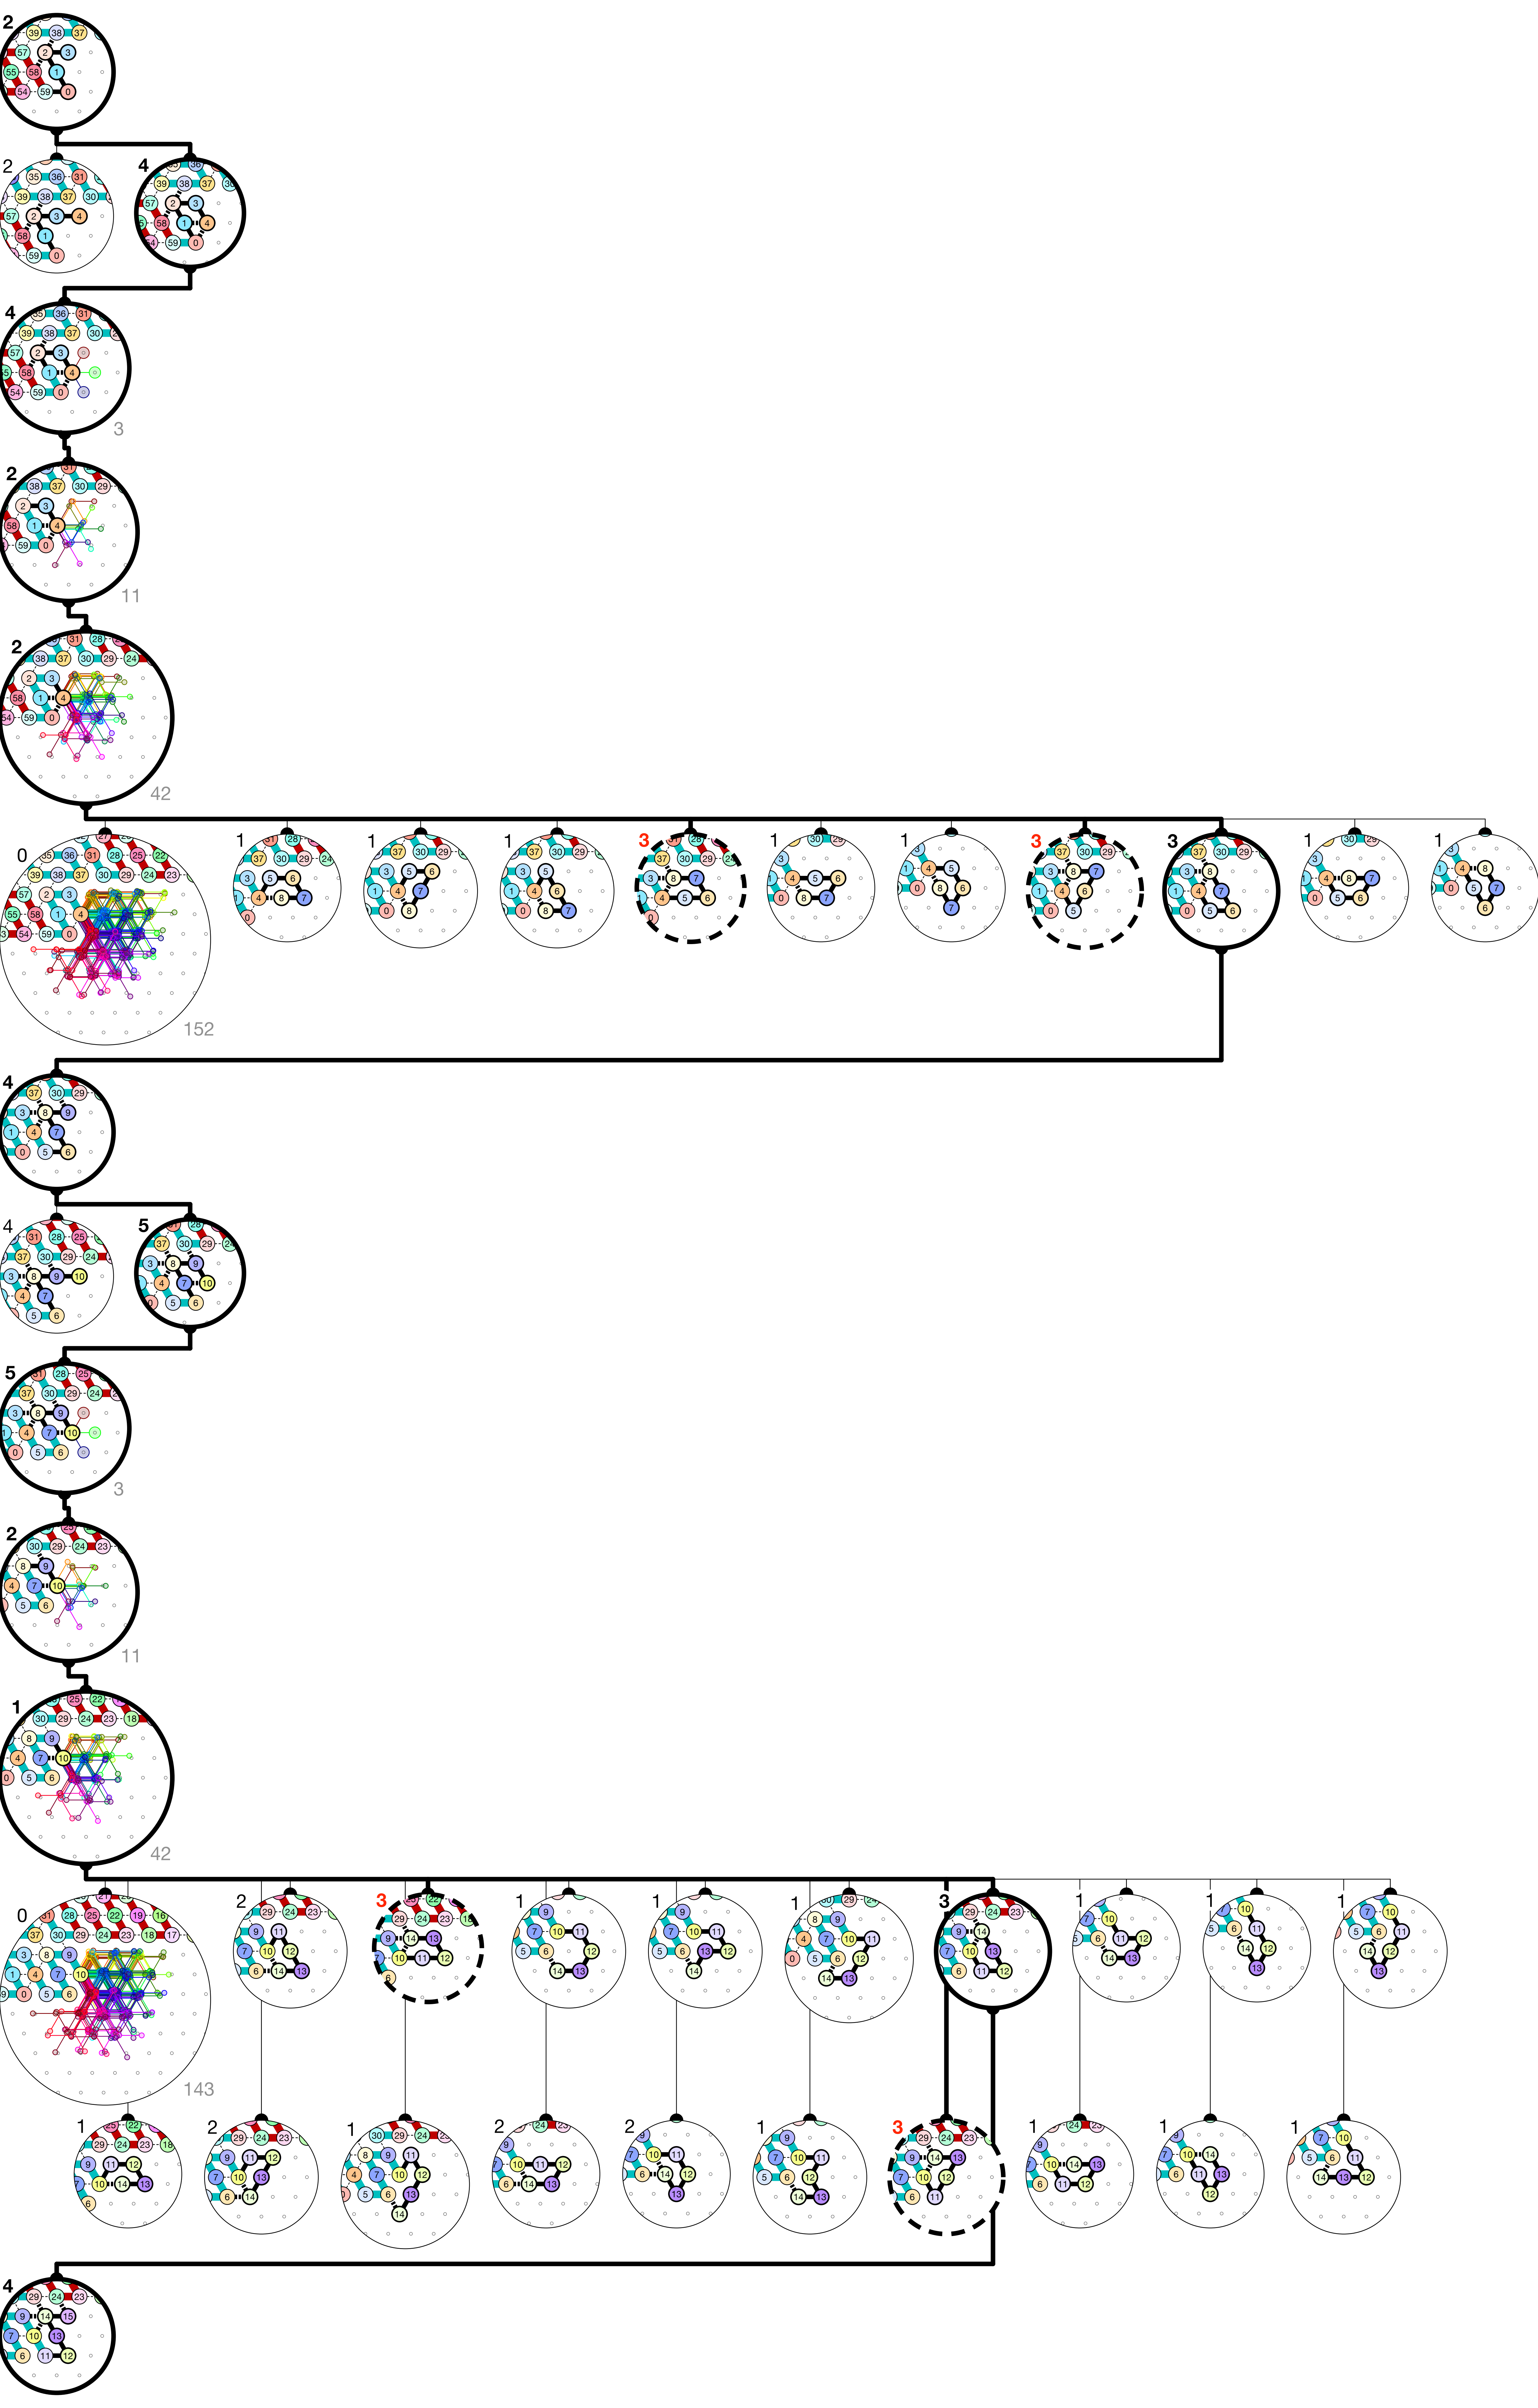

Supplement: s2 [file s2]

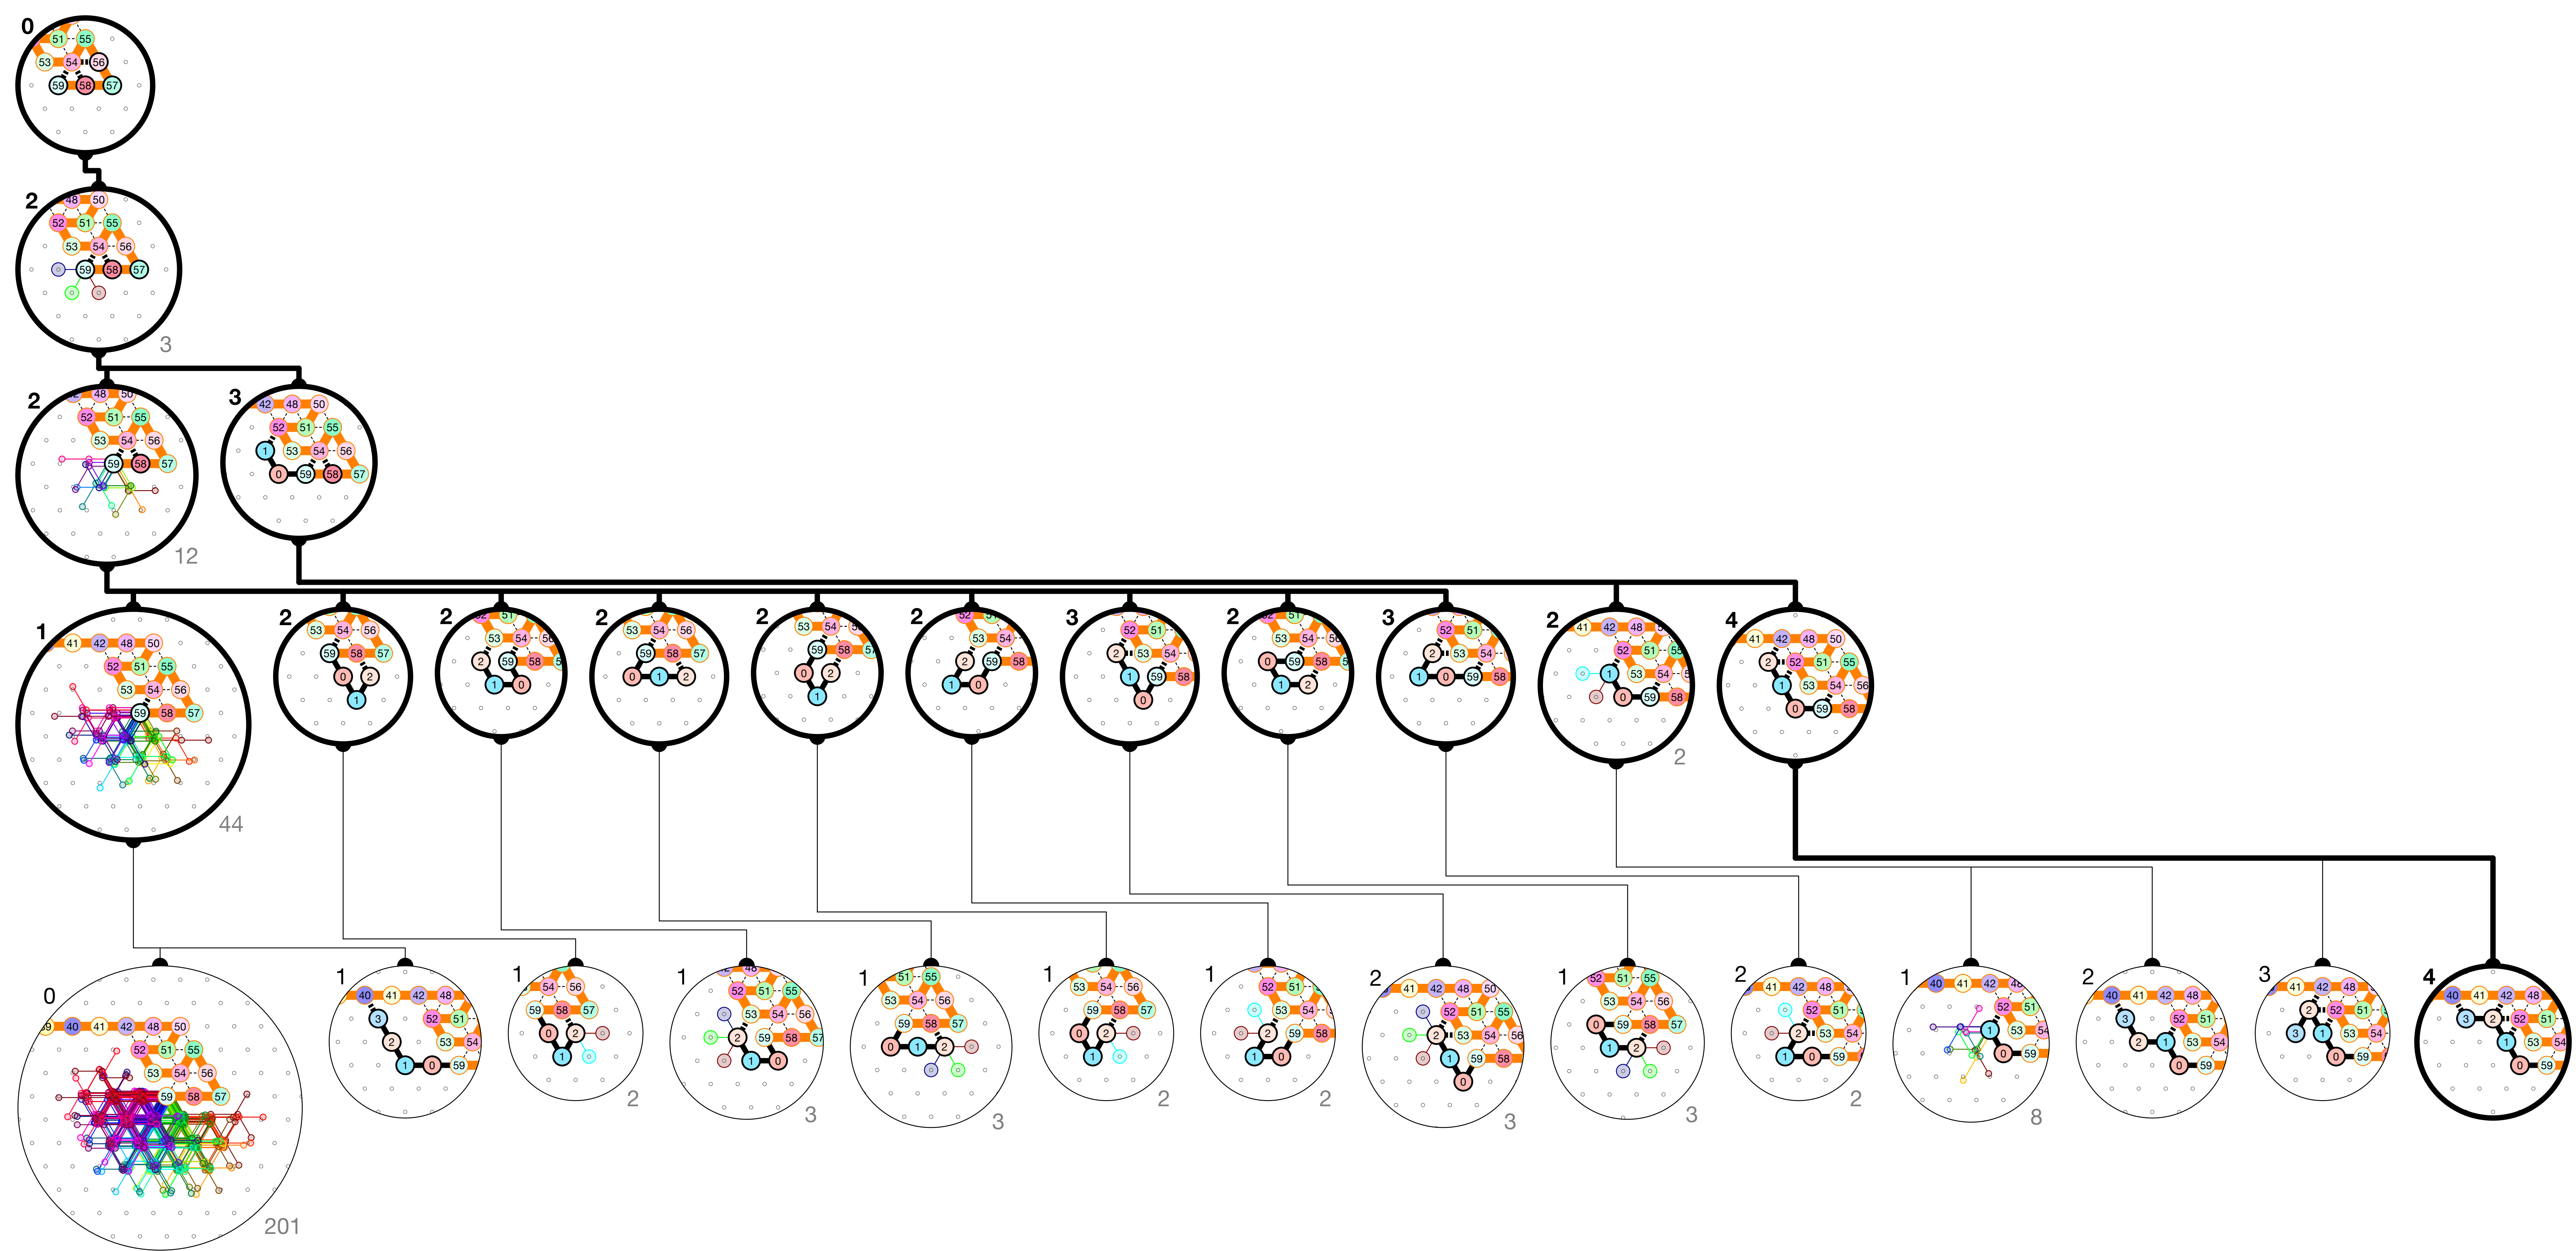

Supplement: s2 [file s2]

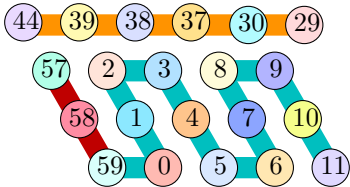

Supplement: s2 [file s2]

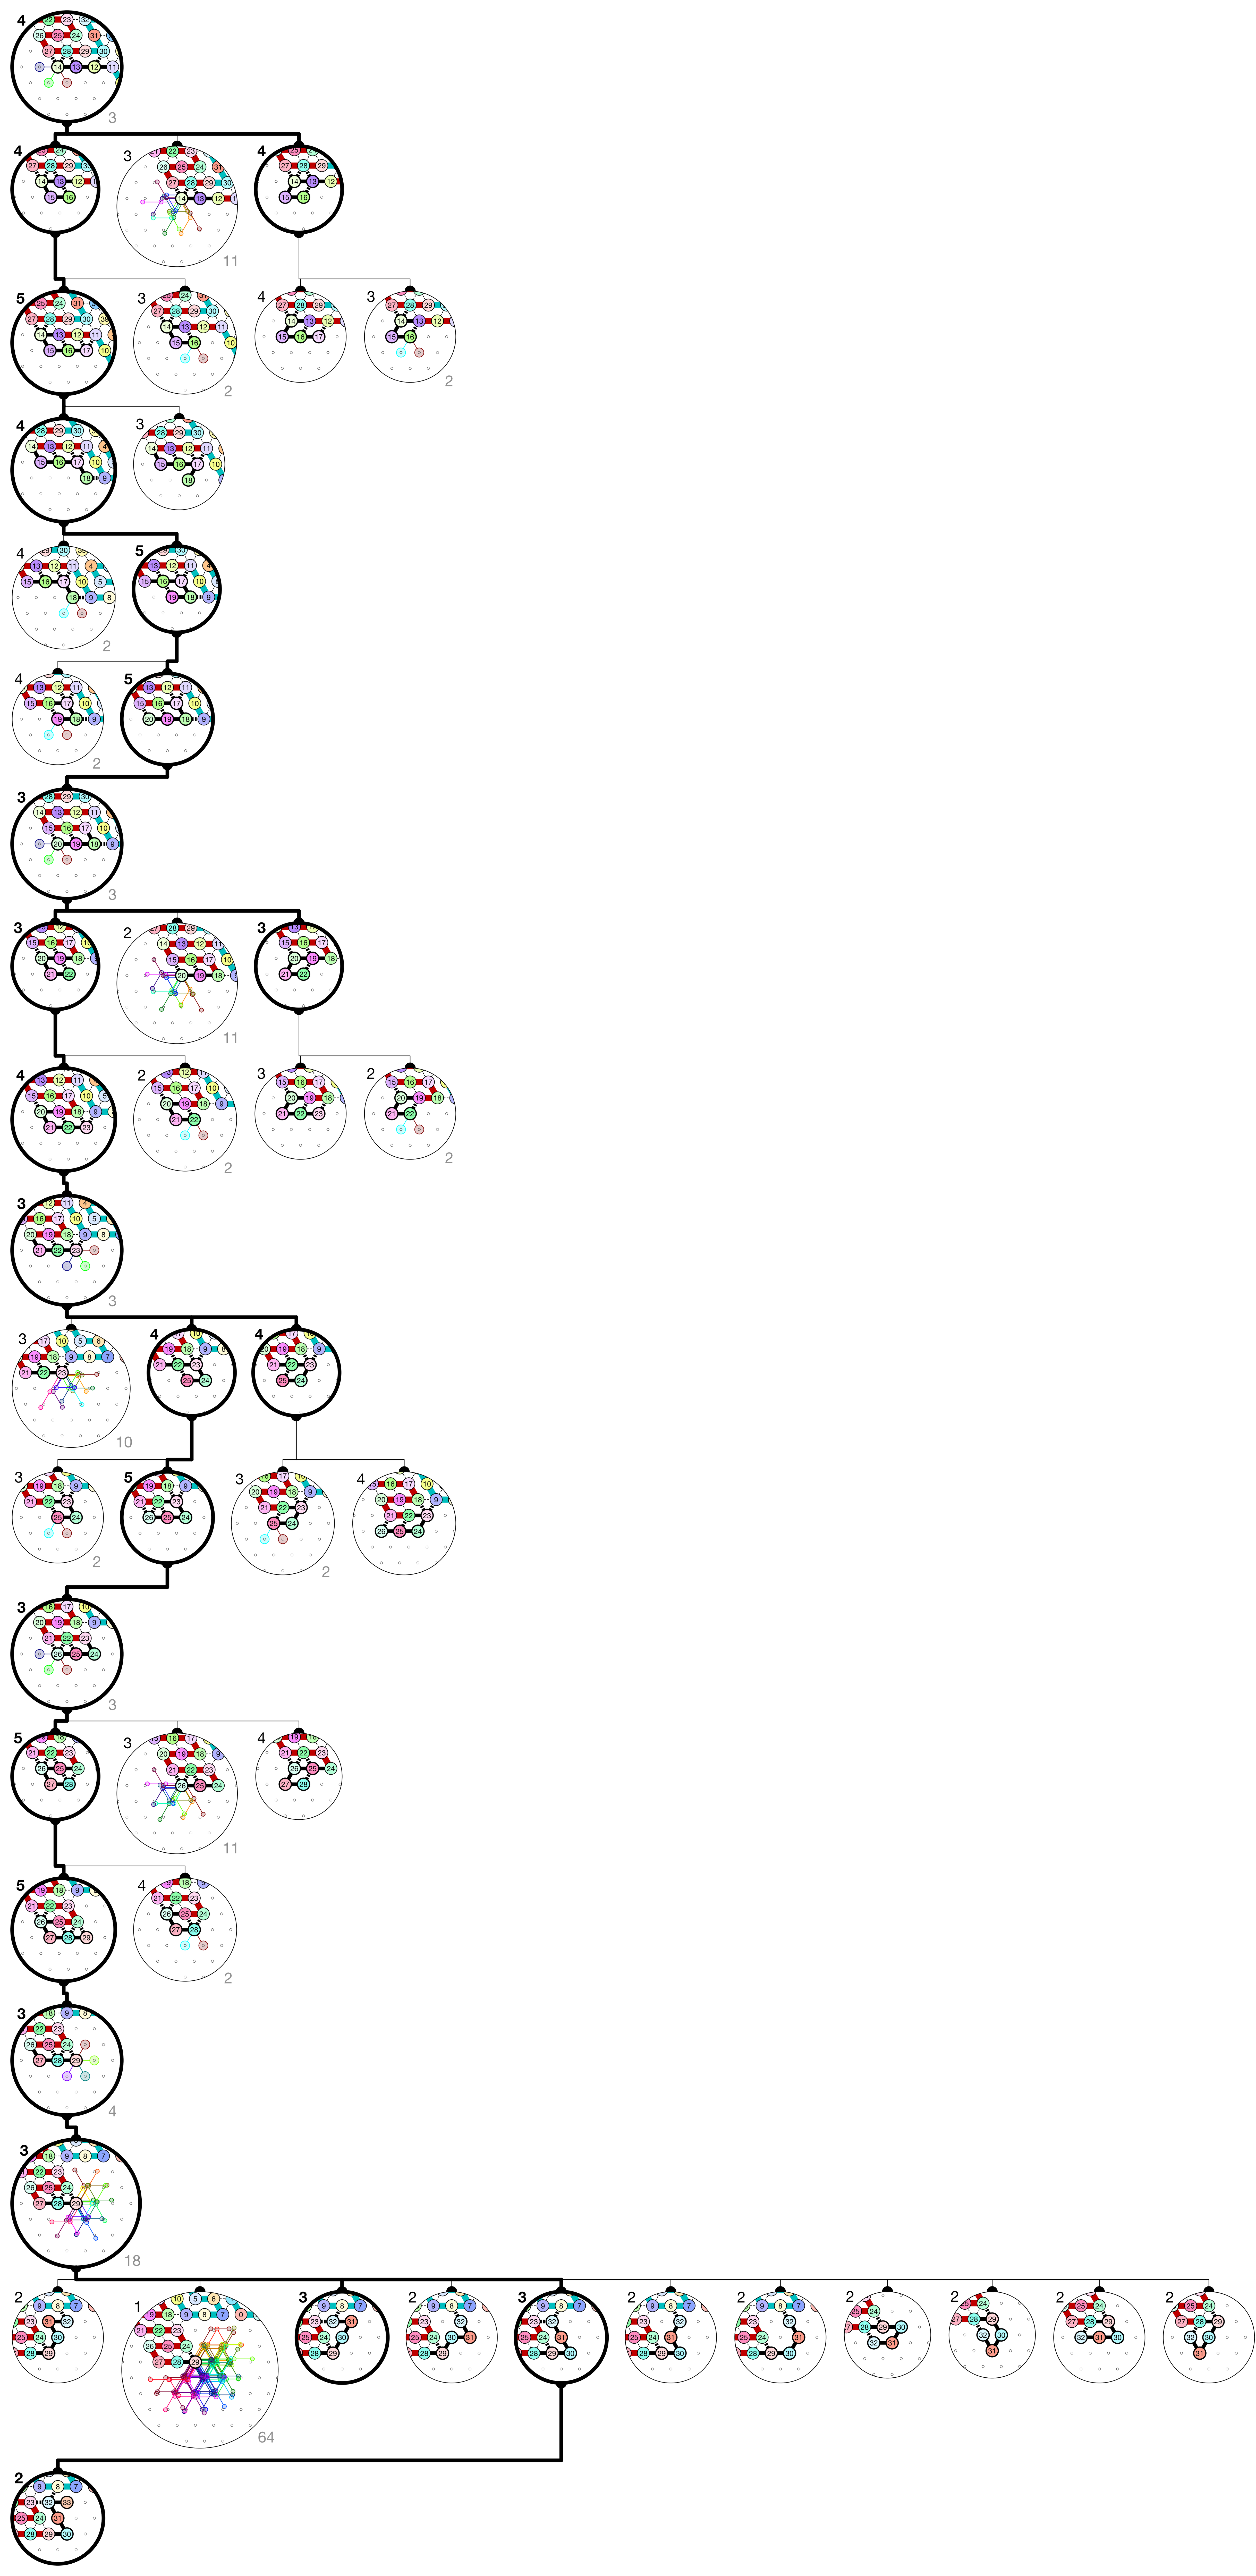

Supplement: s2 [file s2]

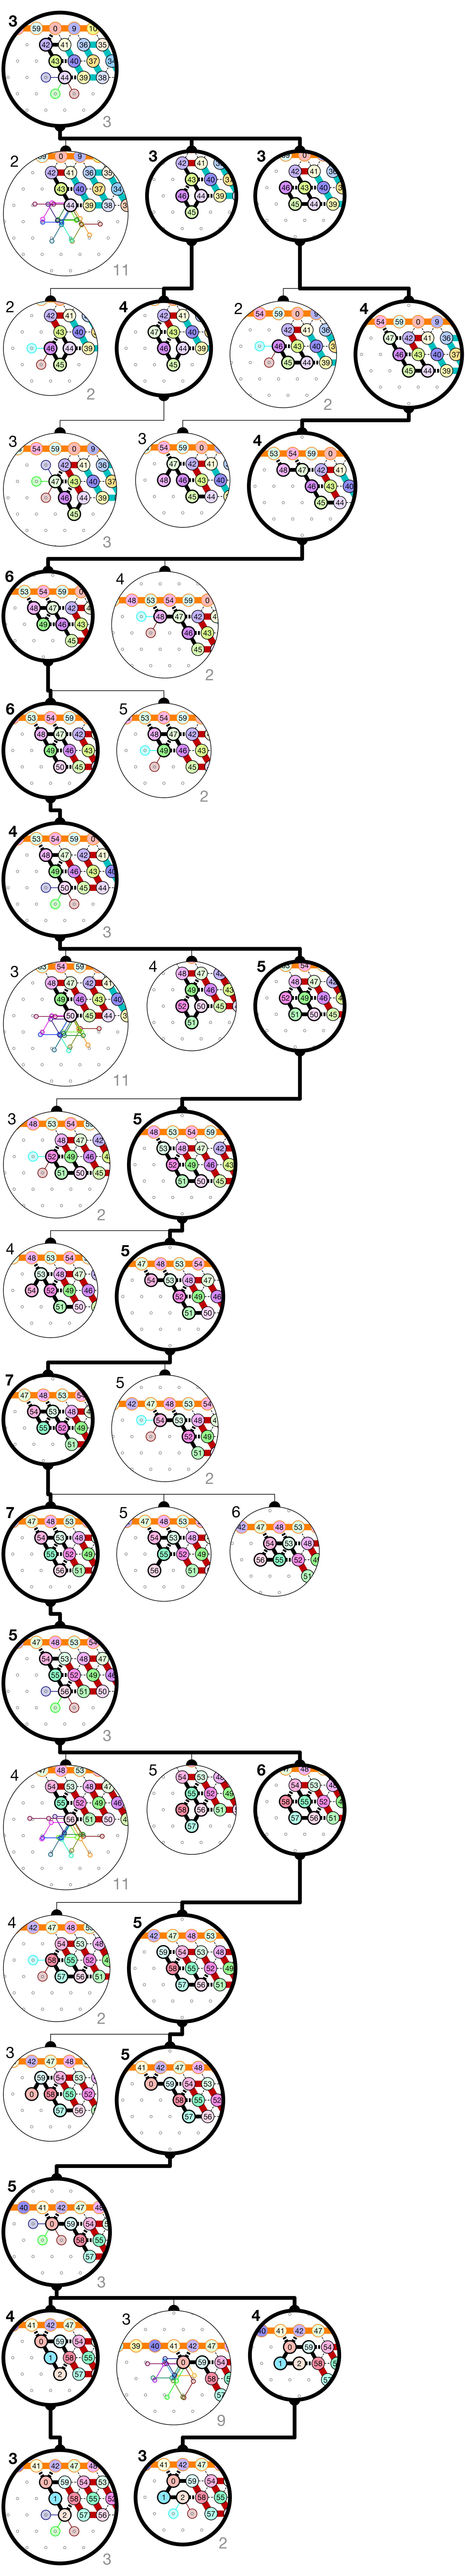

Supplement: s2 [file s2]

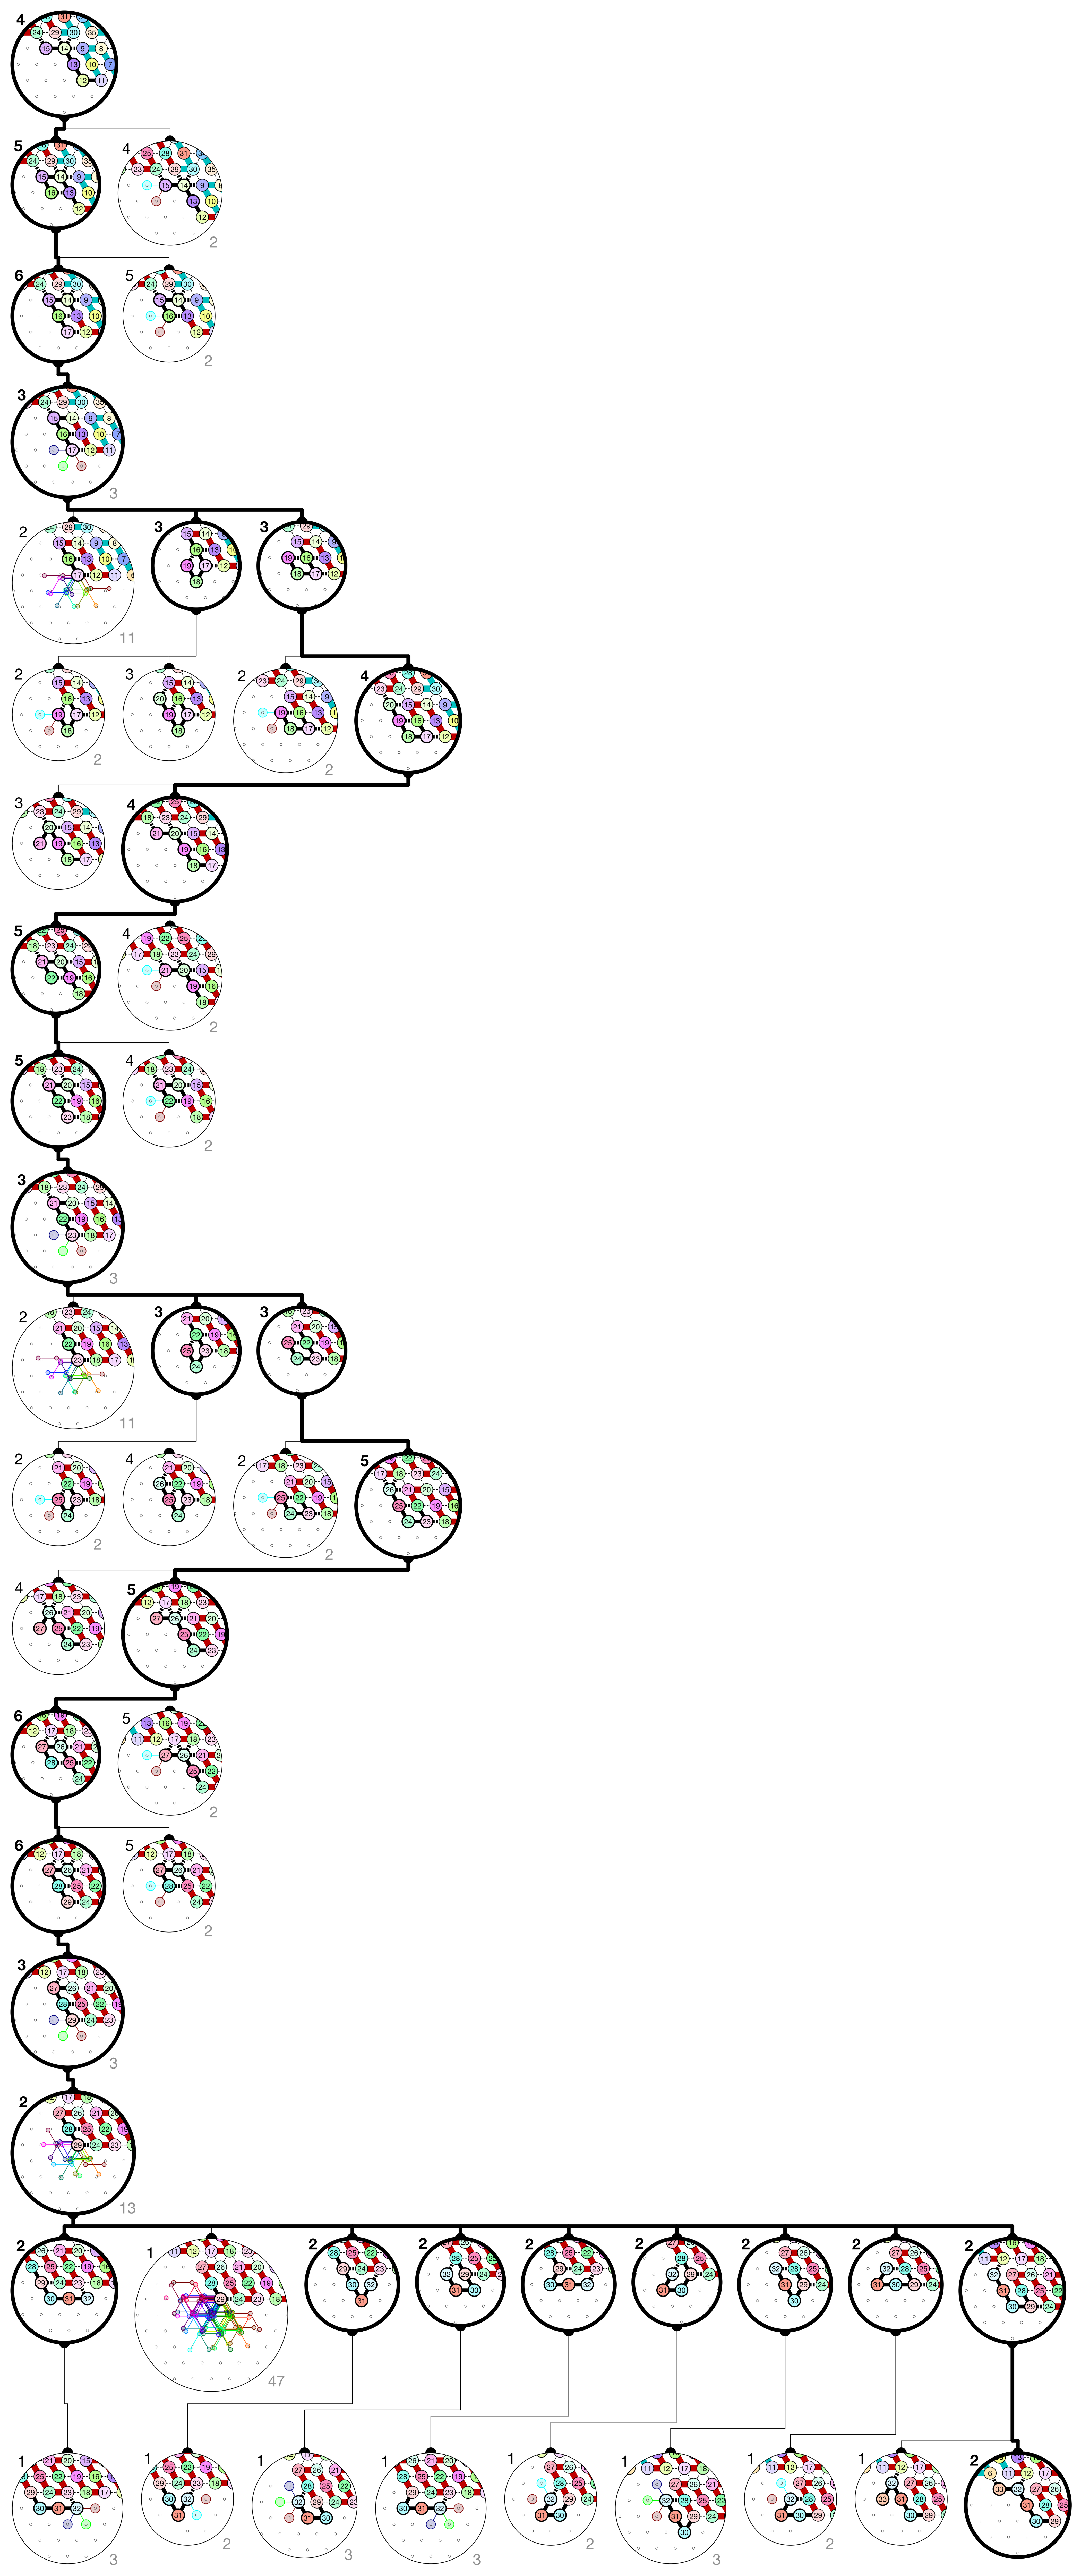

Supplement: s2 [file s2]

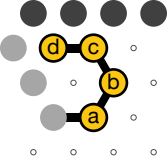

Supplement: s2 [file s2]

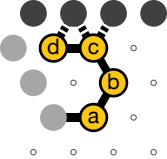

Supplement: s2 [file s2]

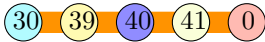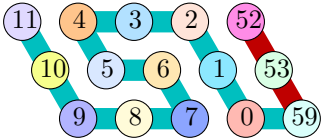

Supplement: s2 [file s2]

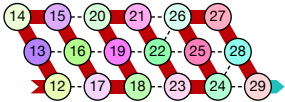

Supplement: s2 [file s2]

## Zig pass ←

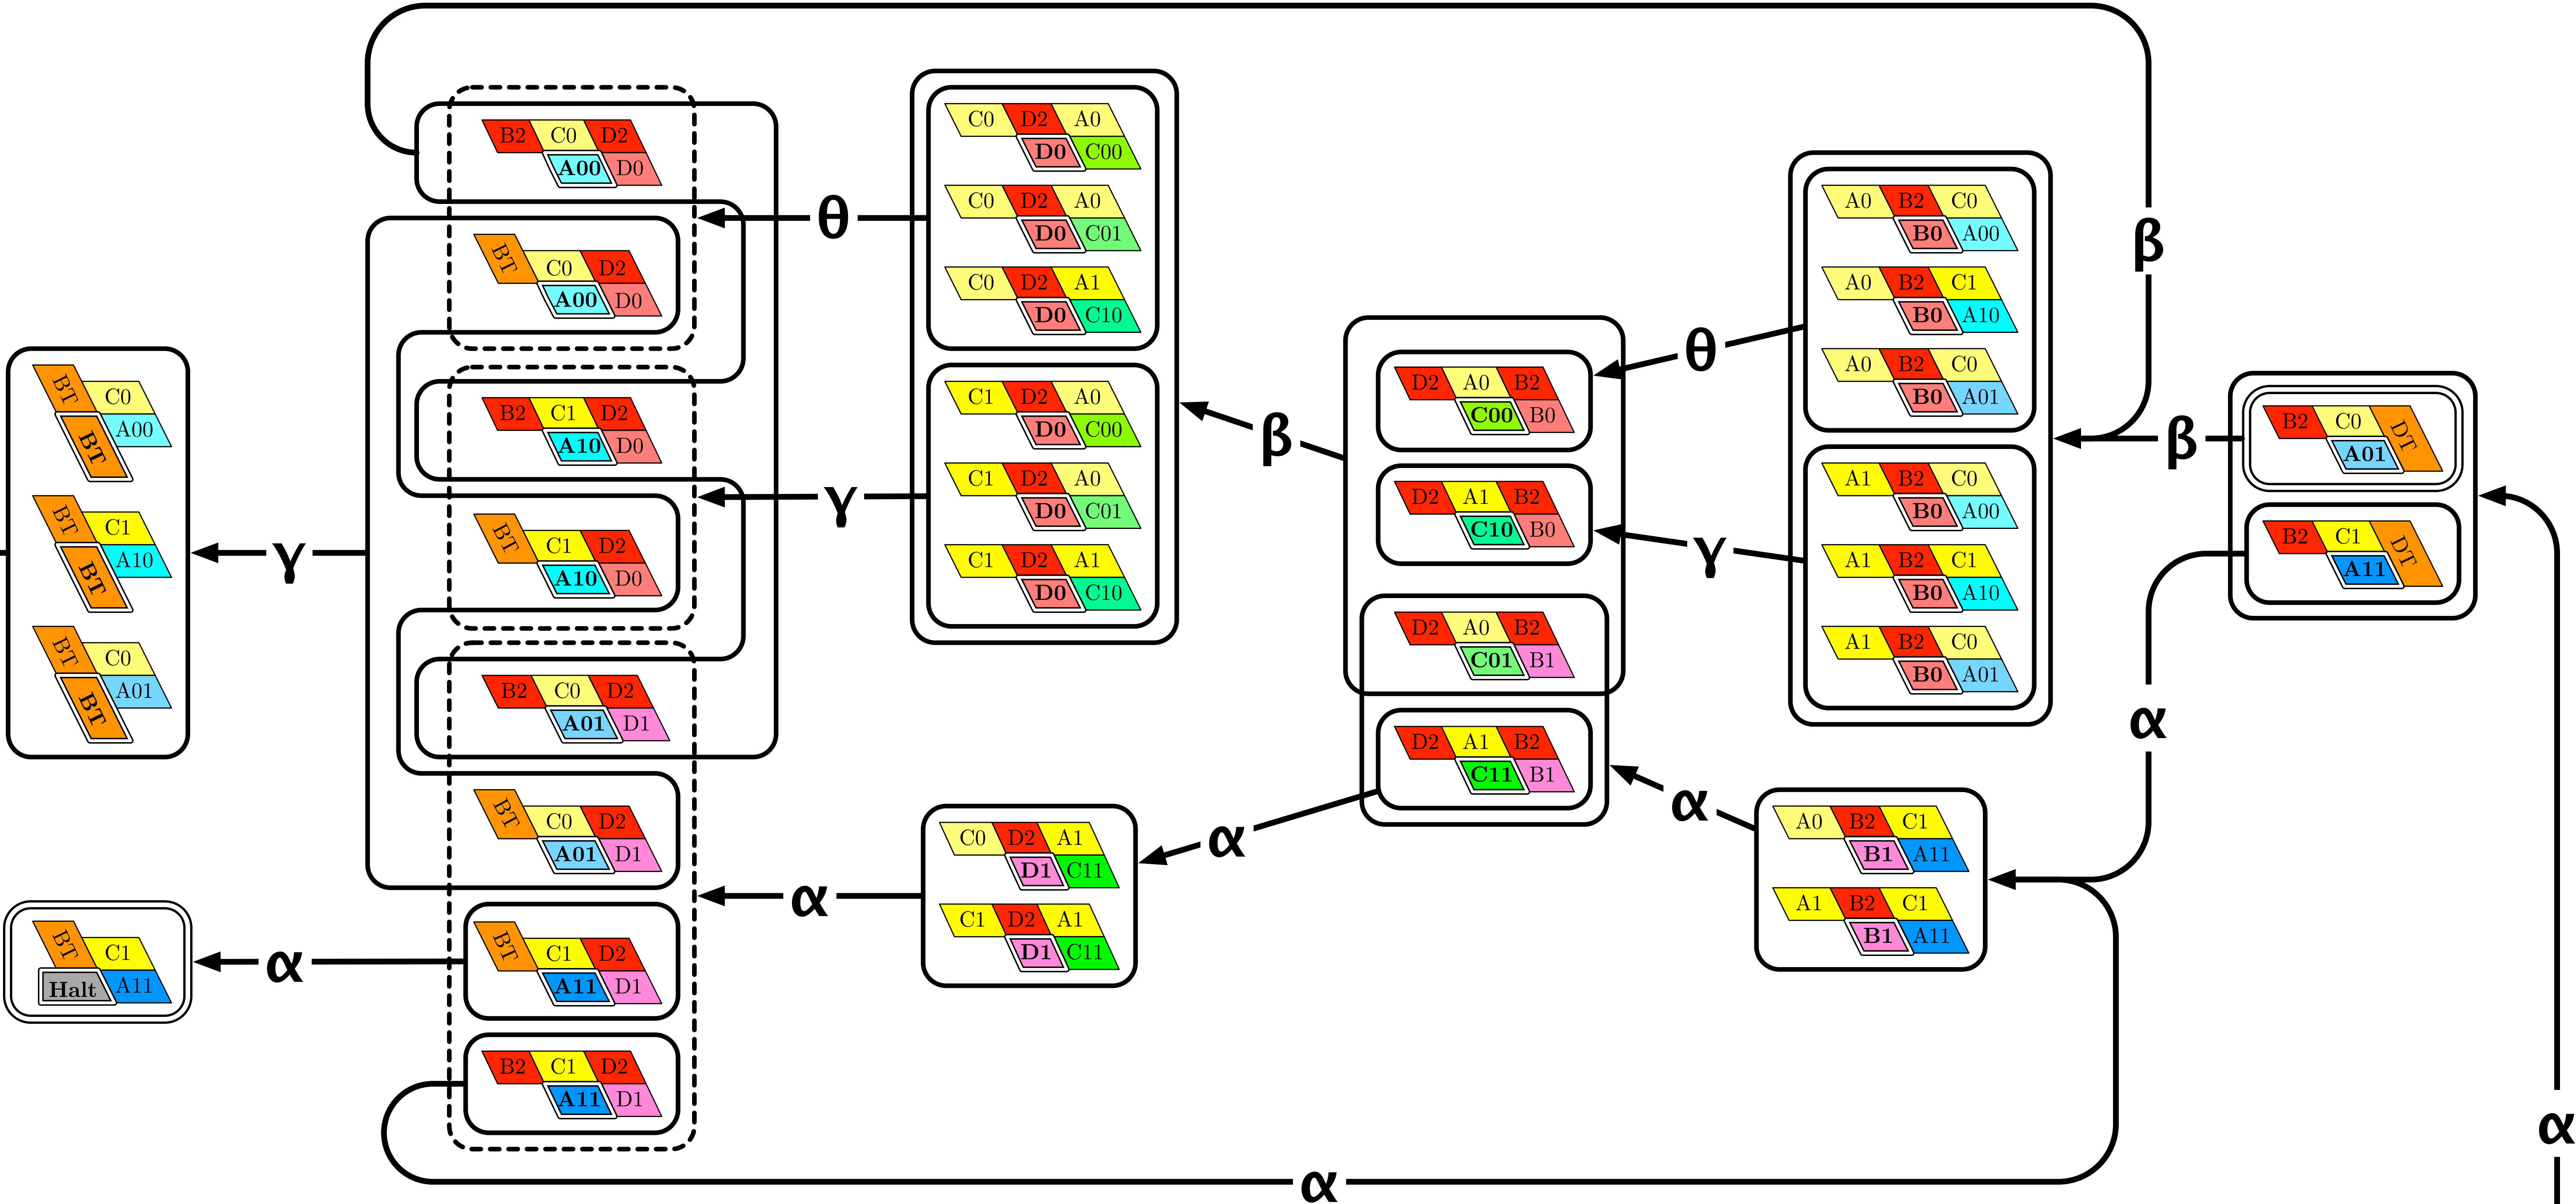

## Zag pass →

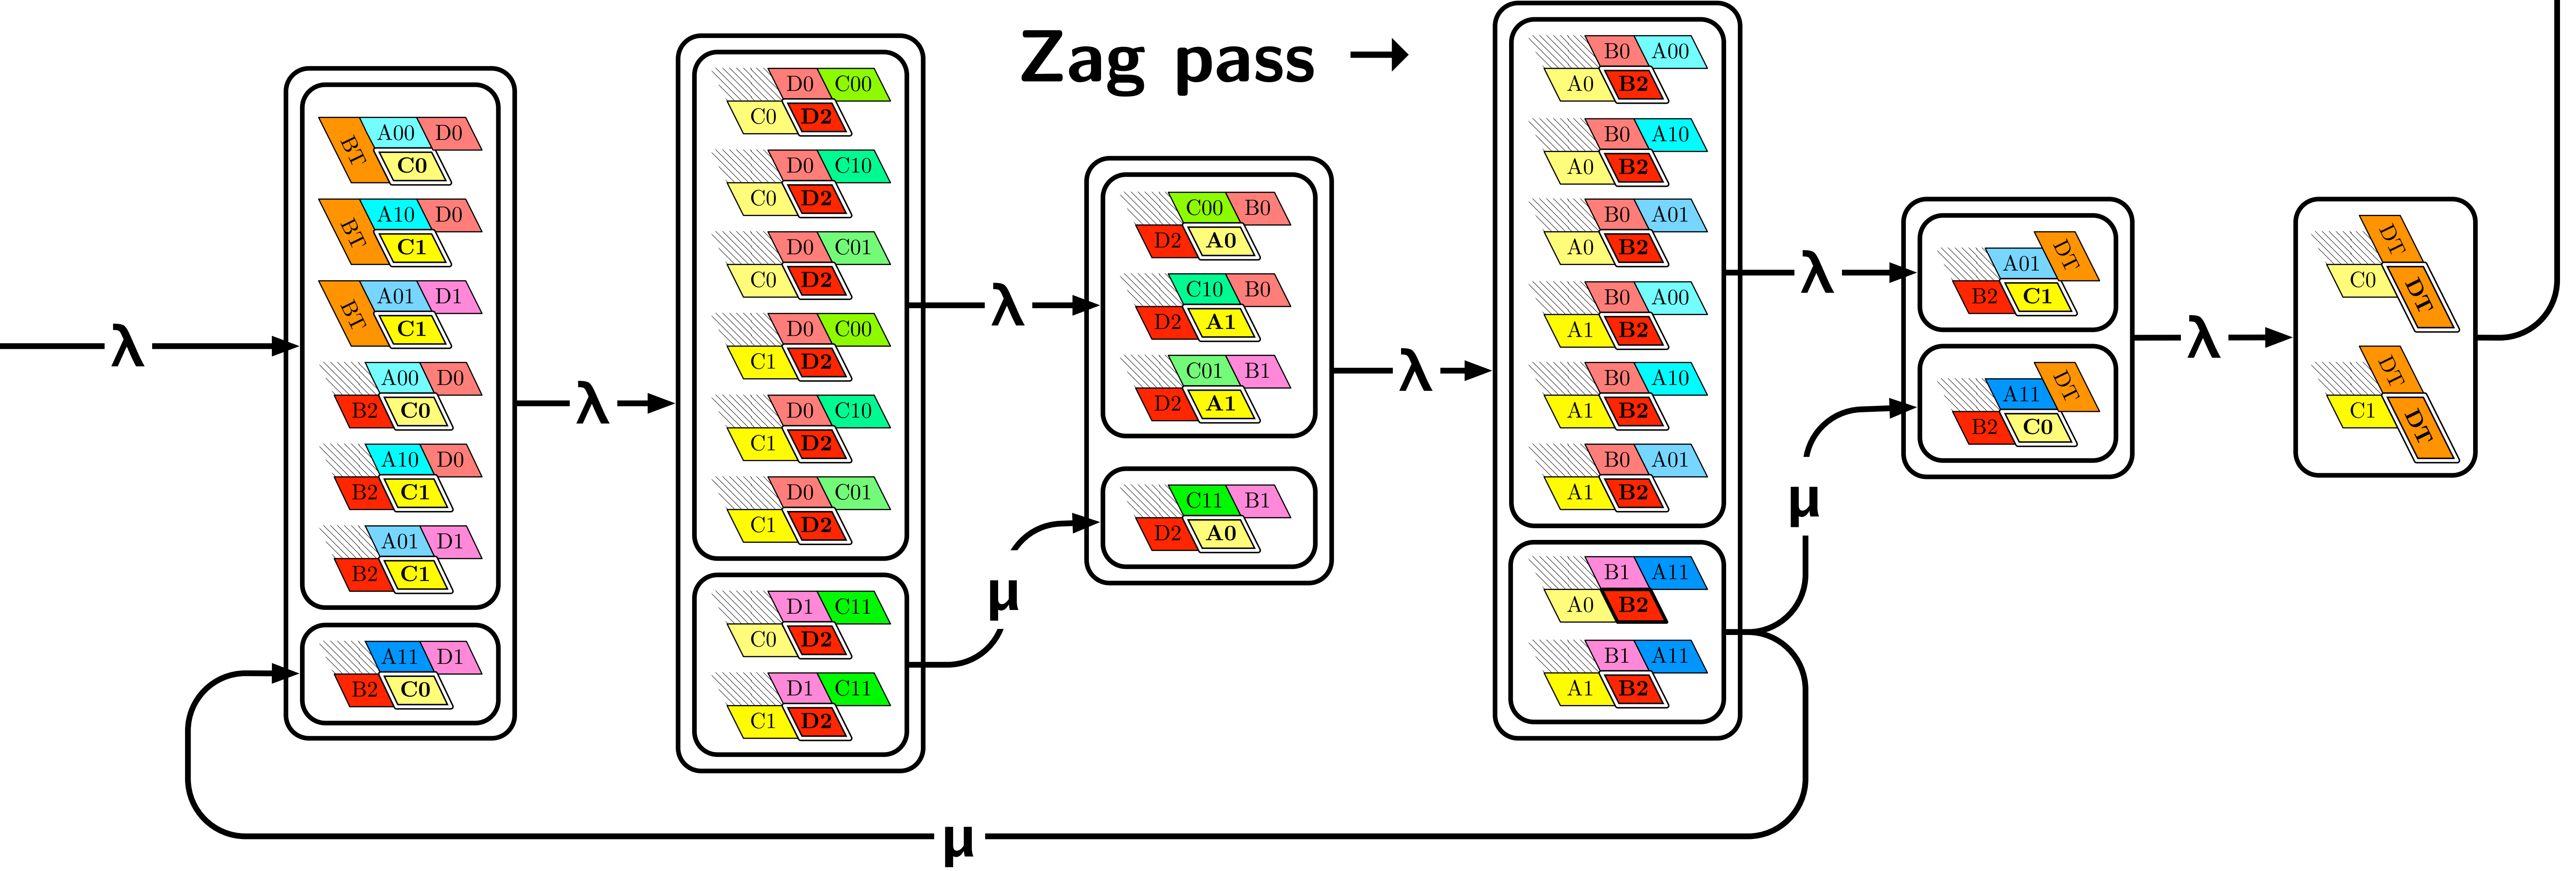

Supplement: s2 [file s2]

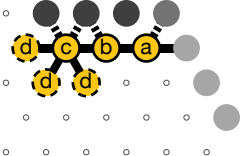

Supplement: s2 [file s2]

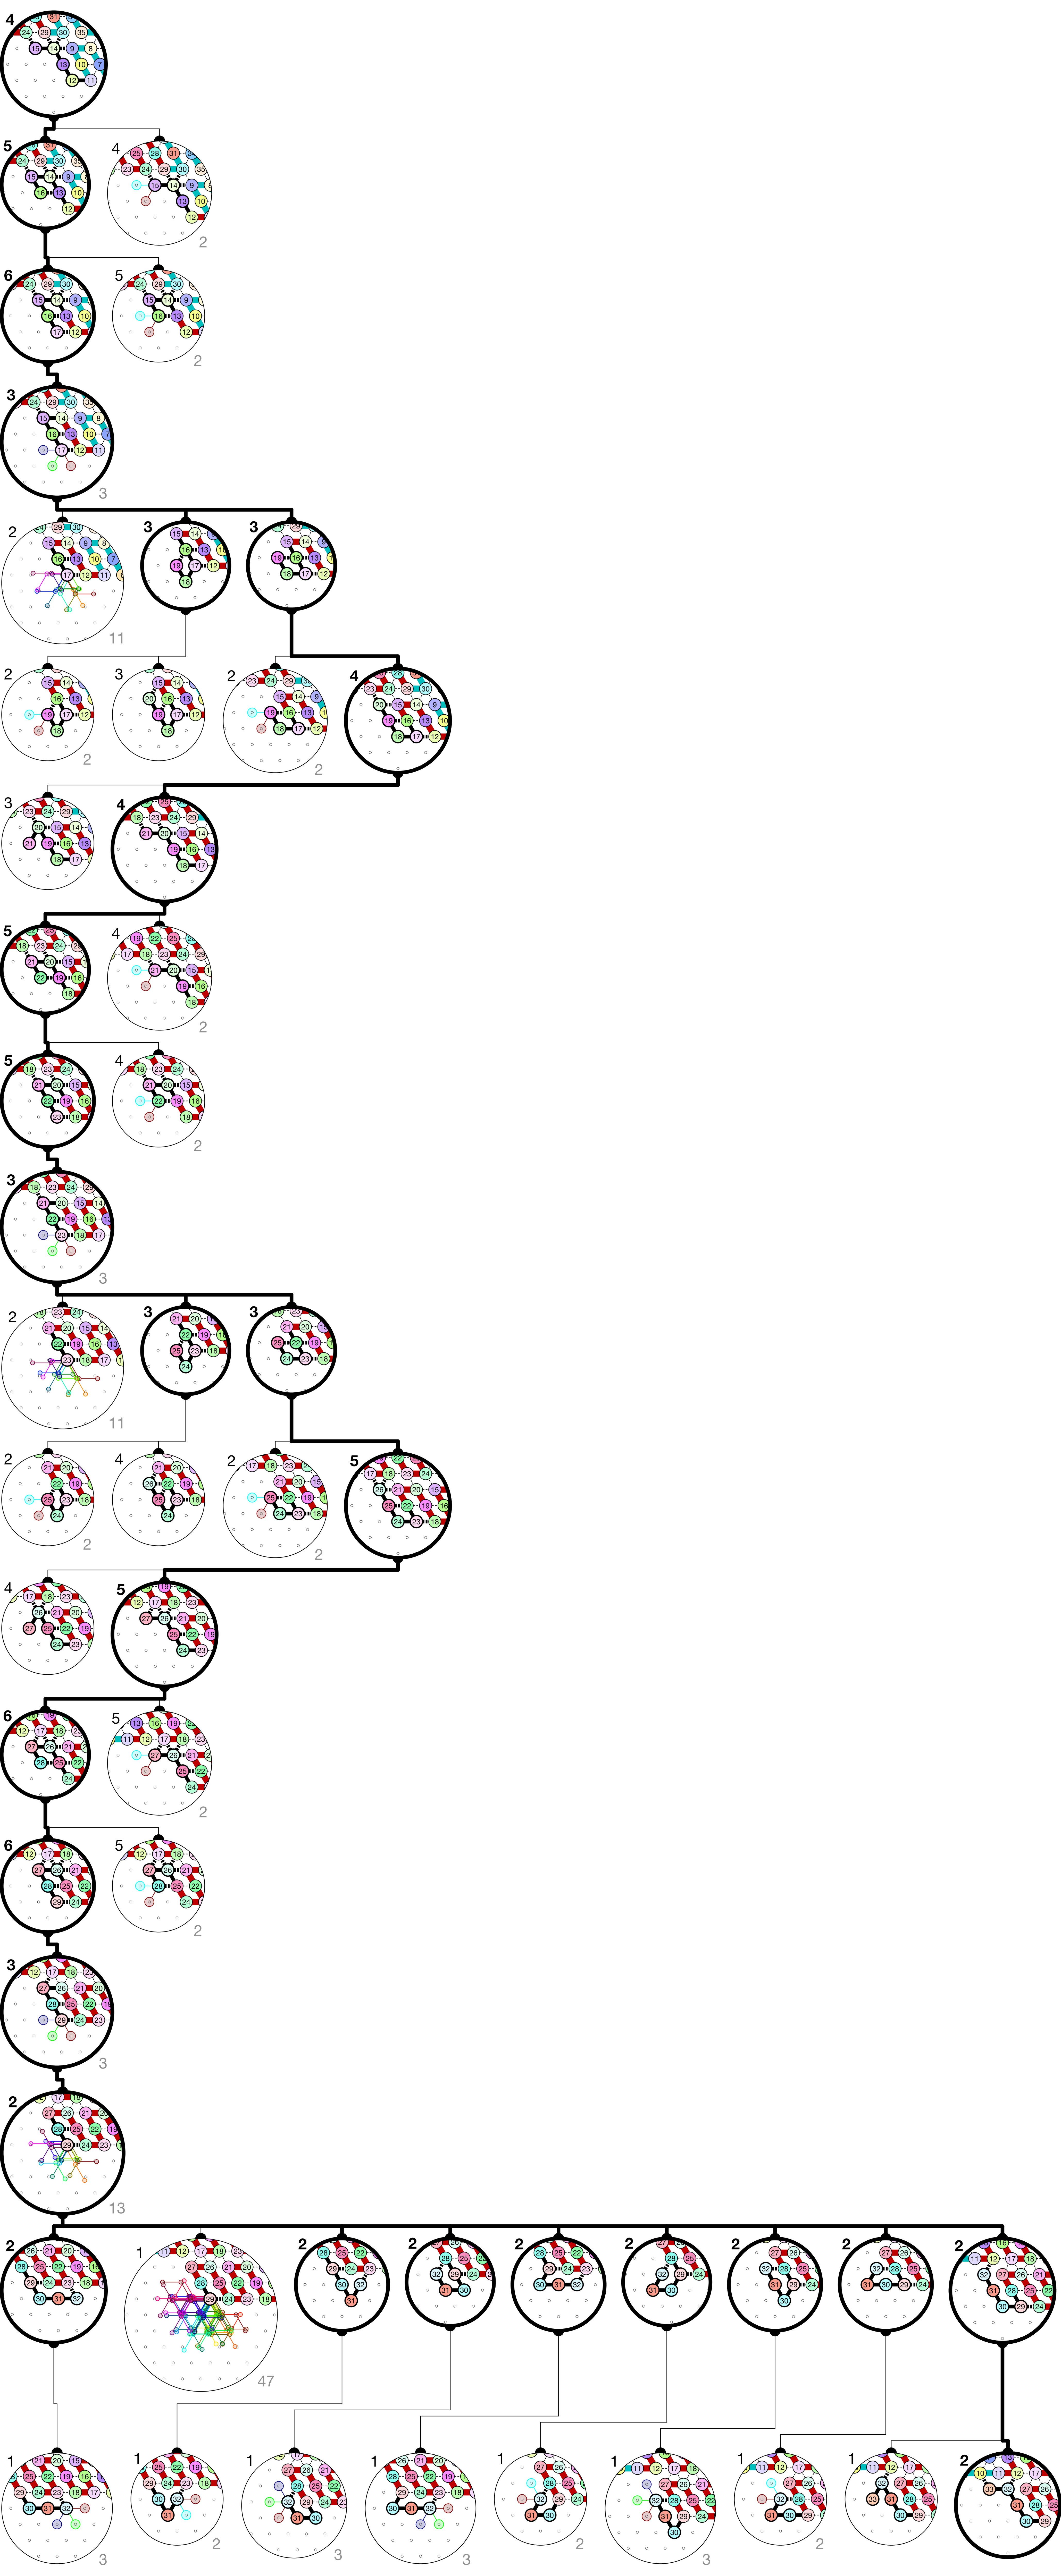

Supplement: s2 [file s2]

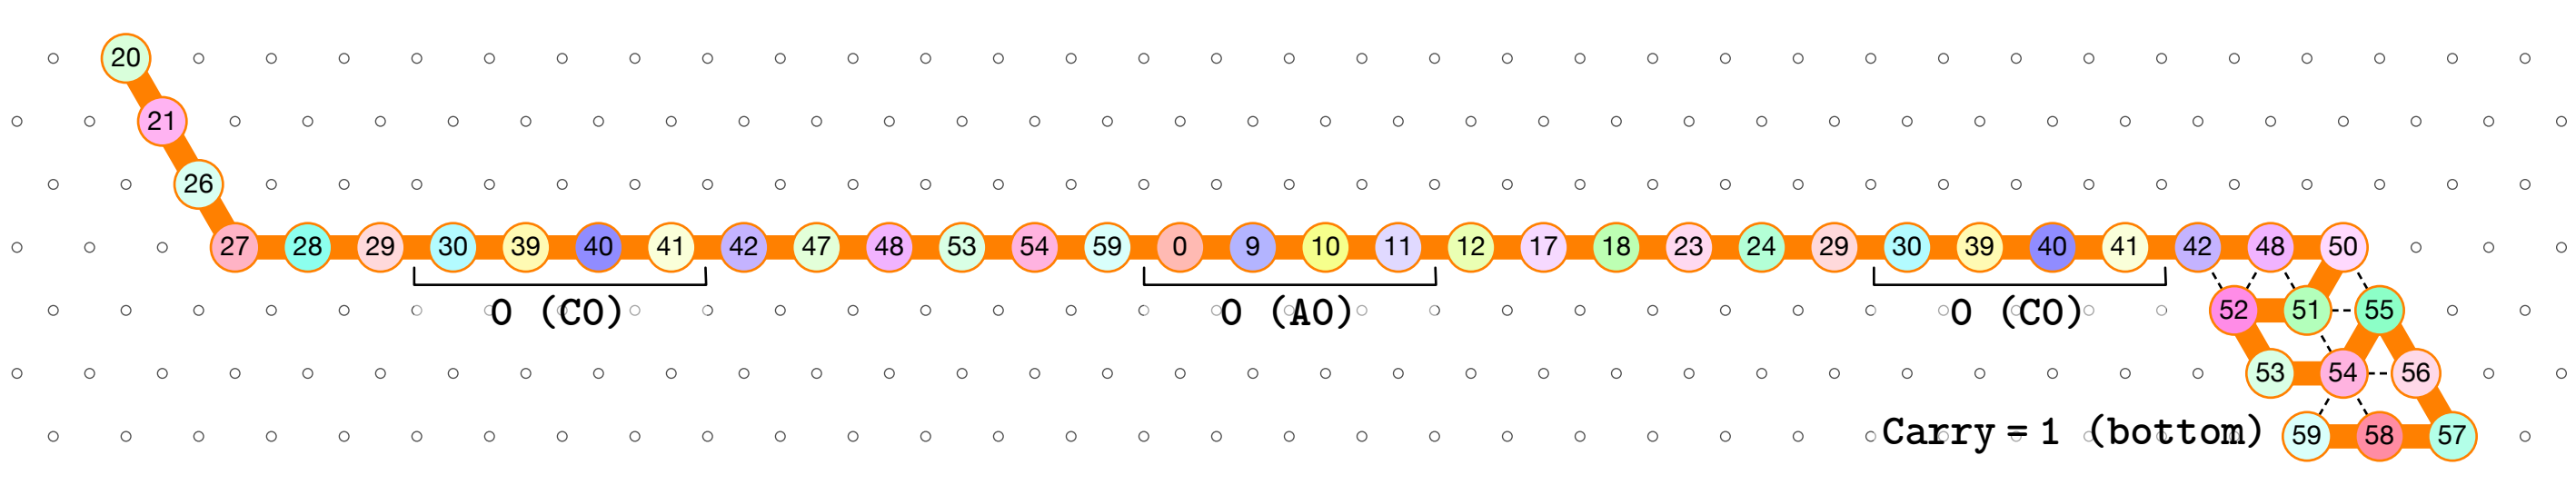

Supplement: s2 [file s2]

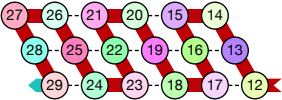

Supplement: s2 [file s2]

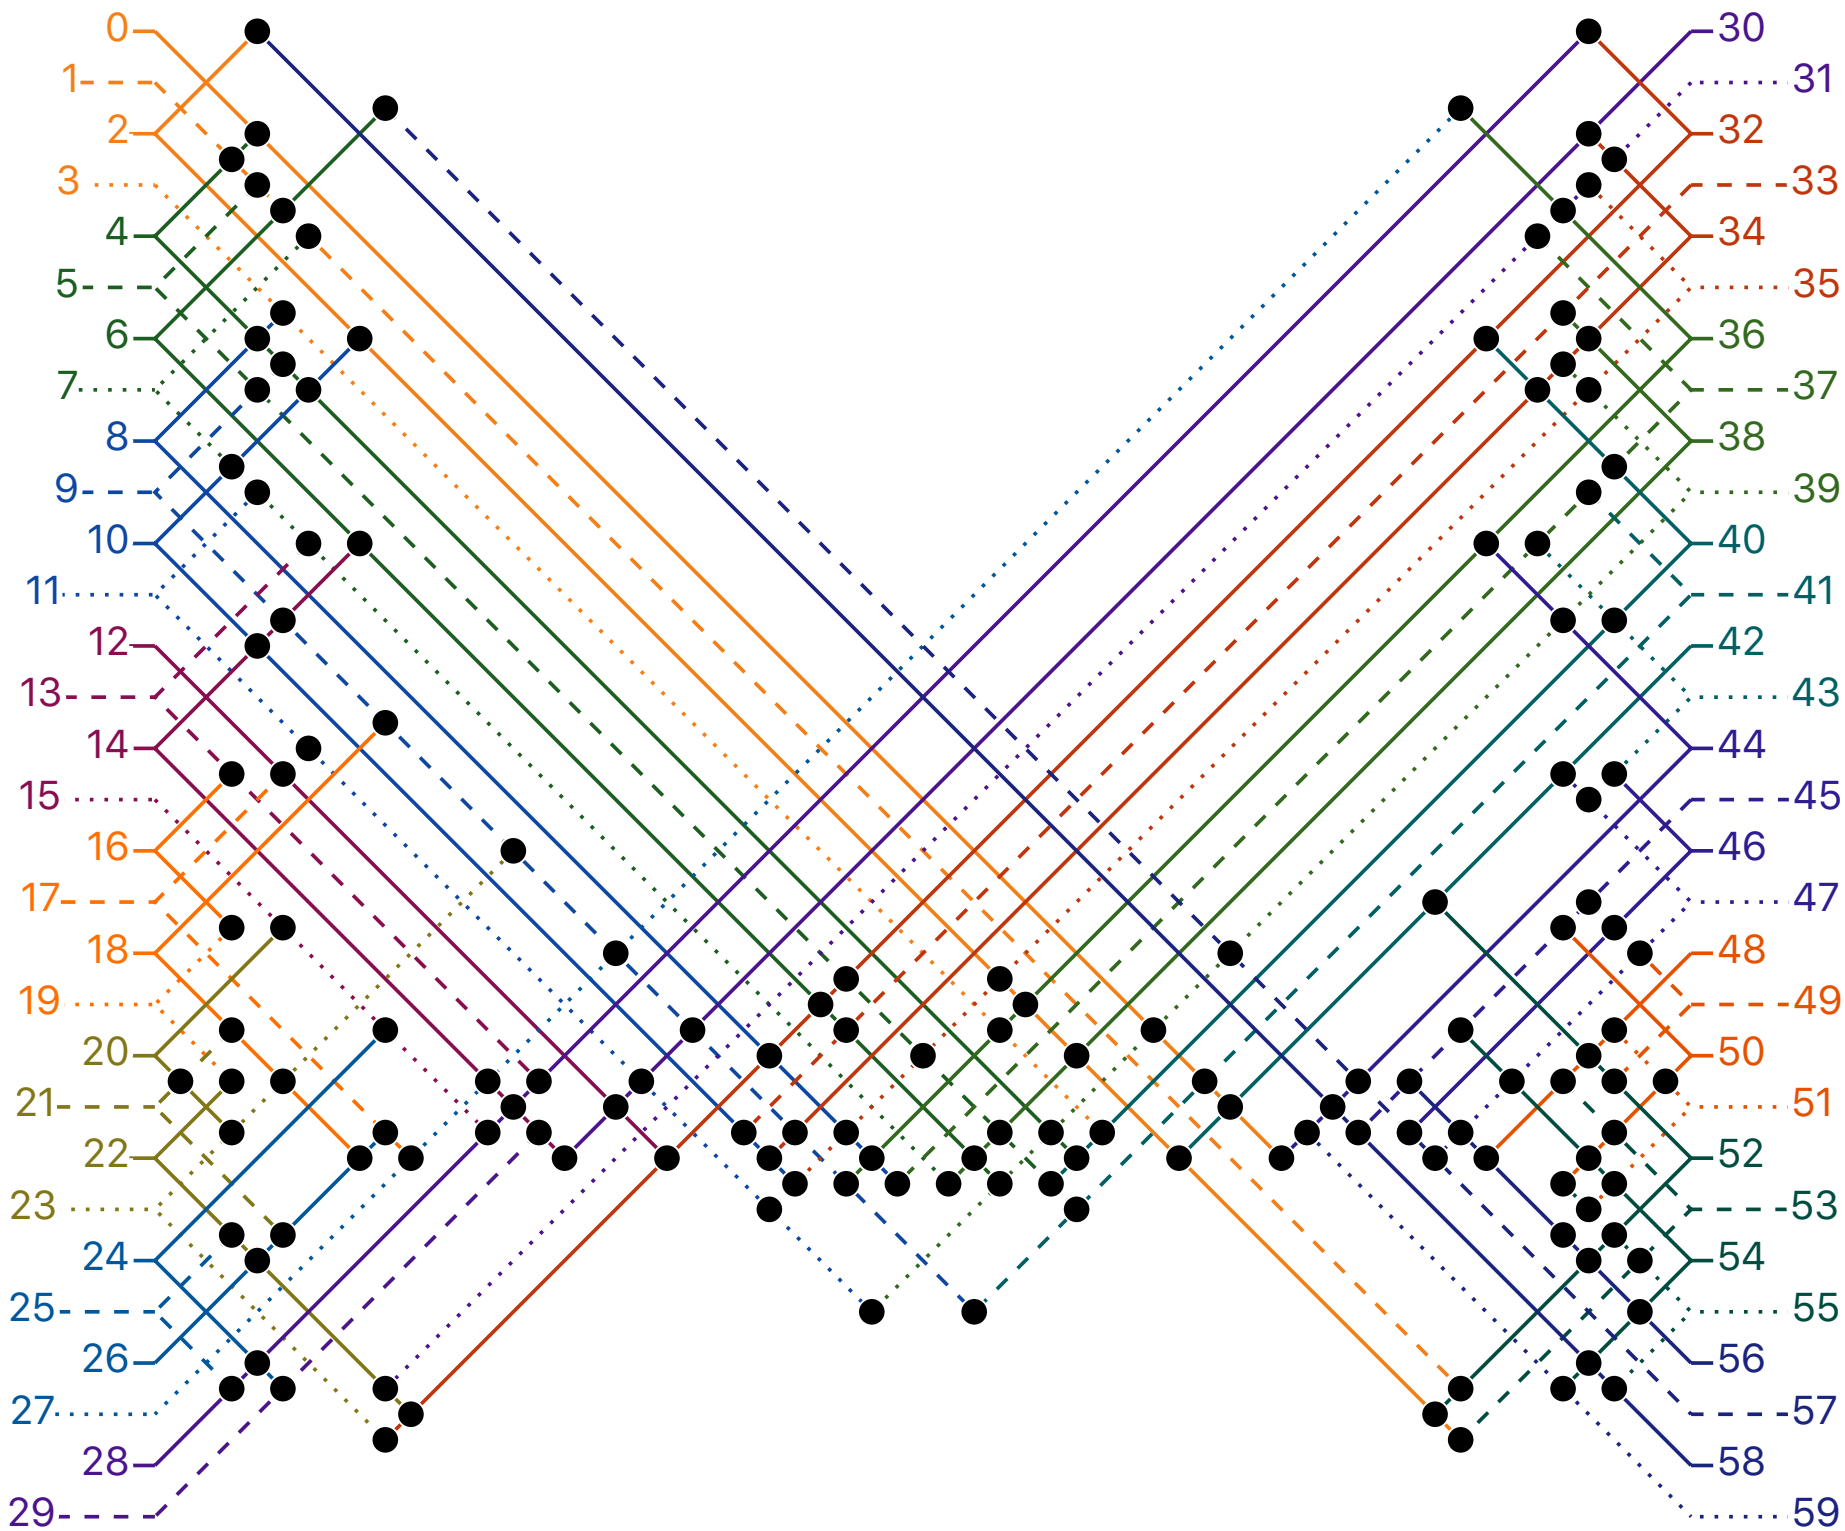

Supplement: s2 [file s2]

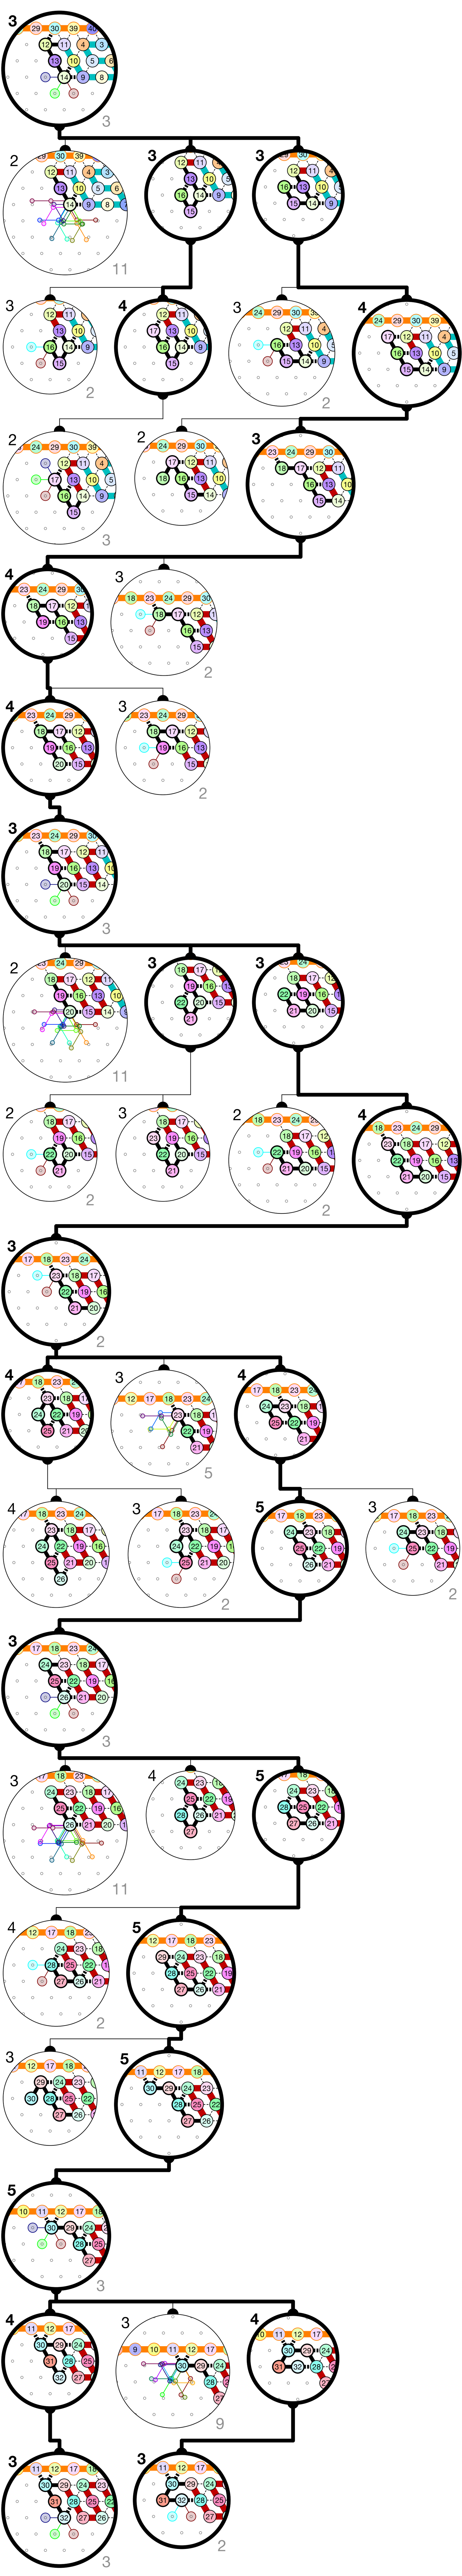

Supplement: s2 [file s2]

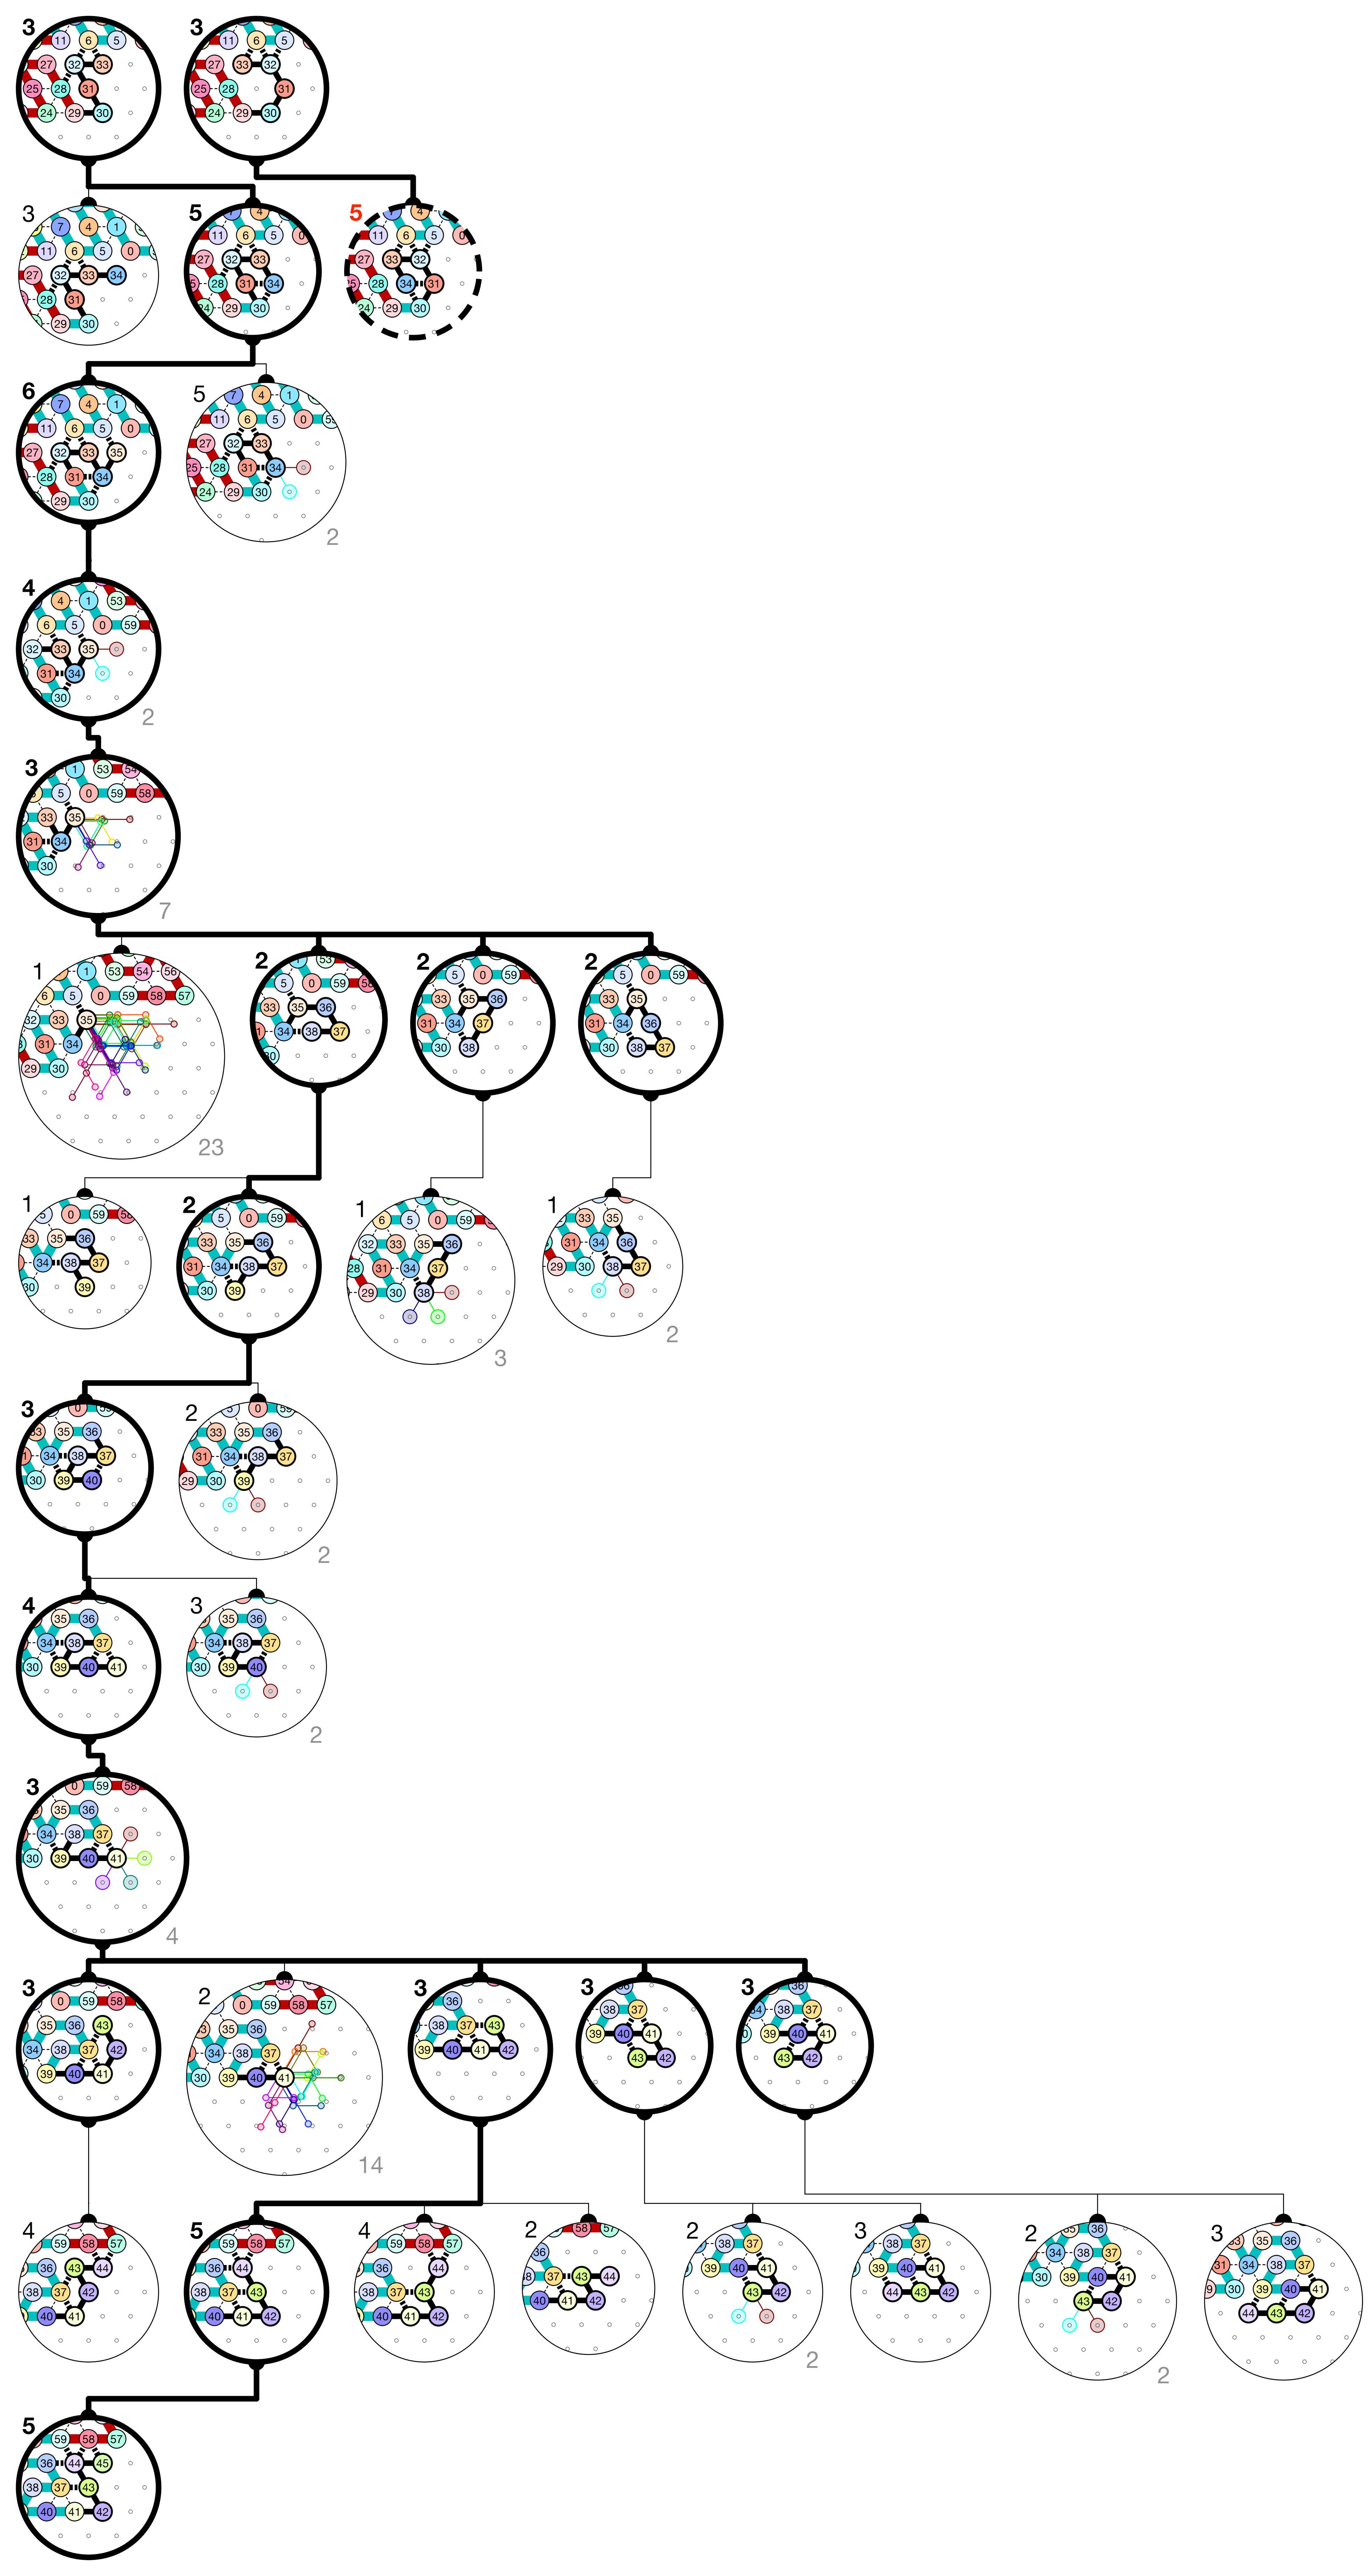

Supplement: s2 [file s2]

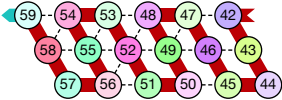

Supplement: s2 [file s2]

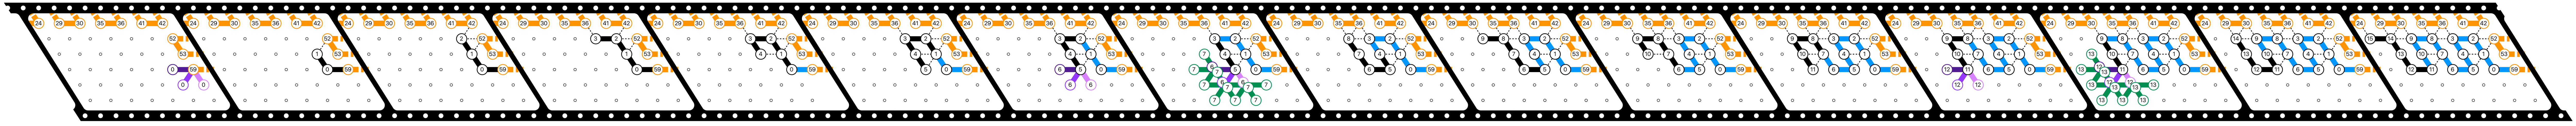

Supplement: s2 [file s2]

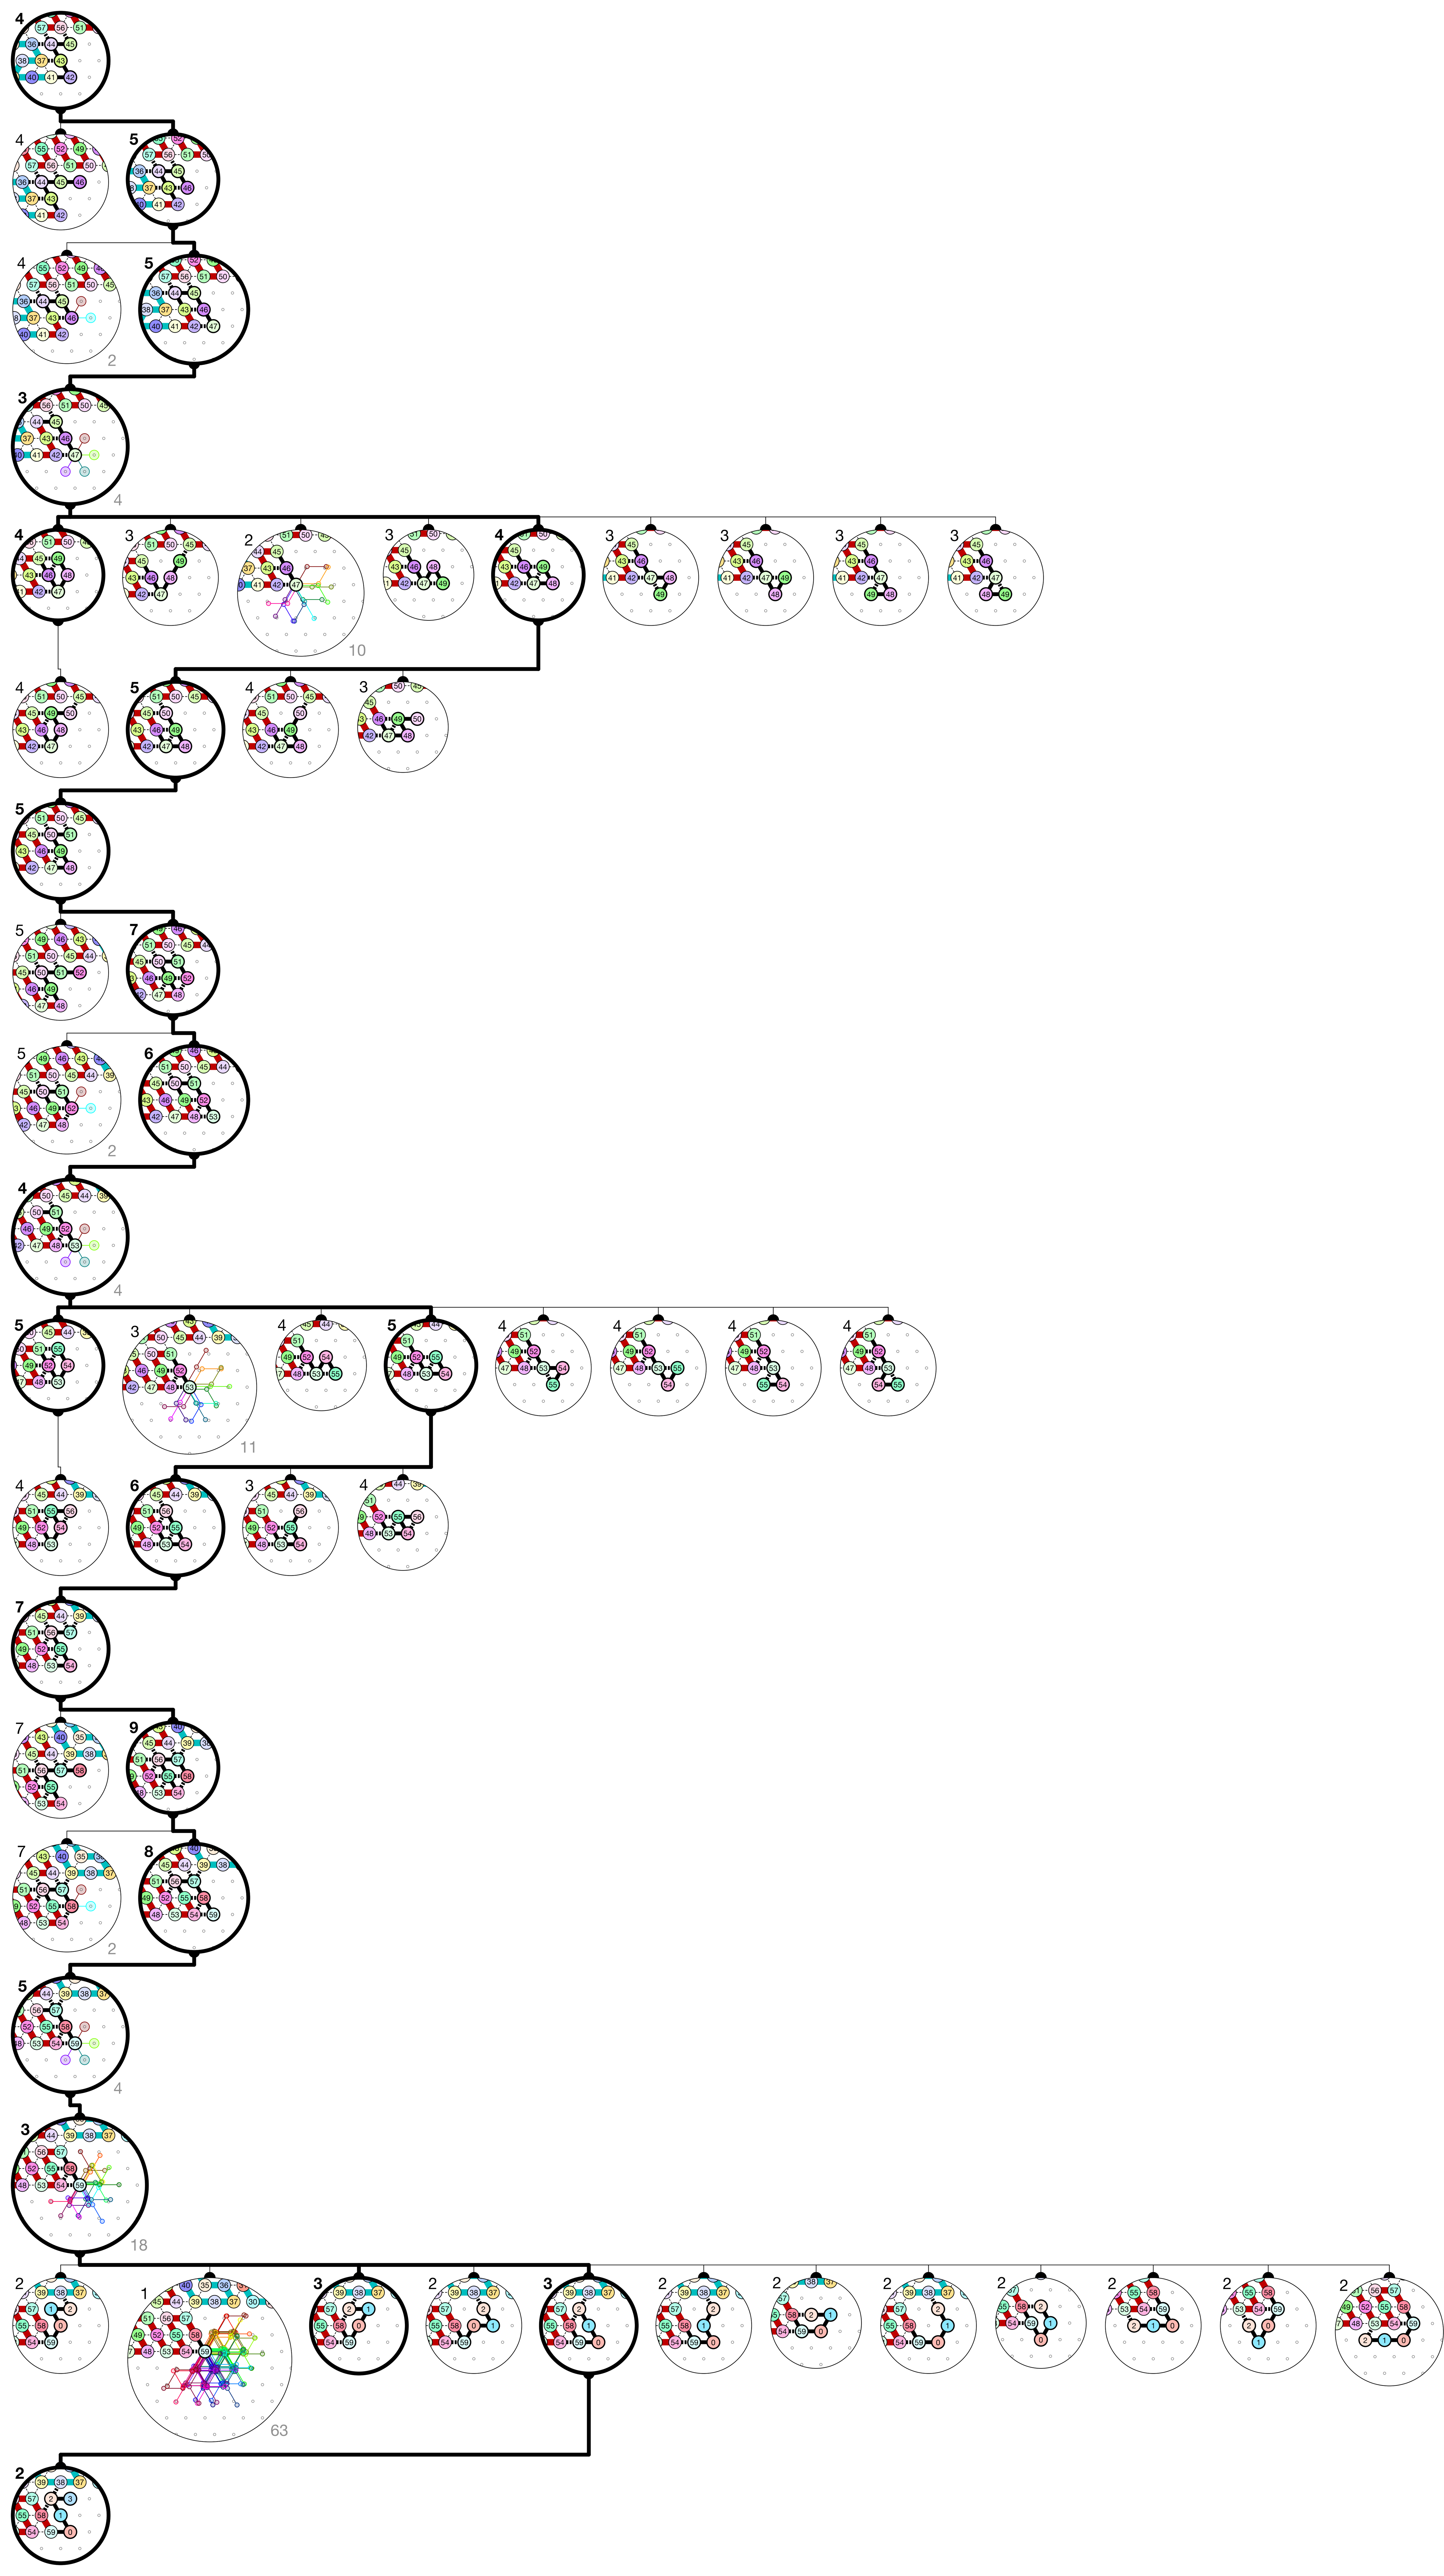

Supplement: s2 [file s2]

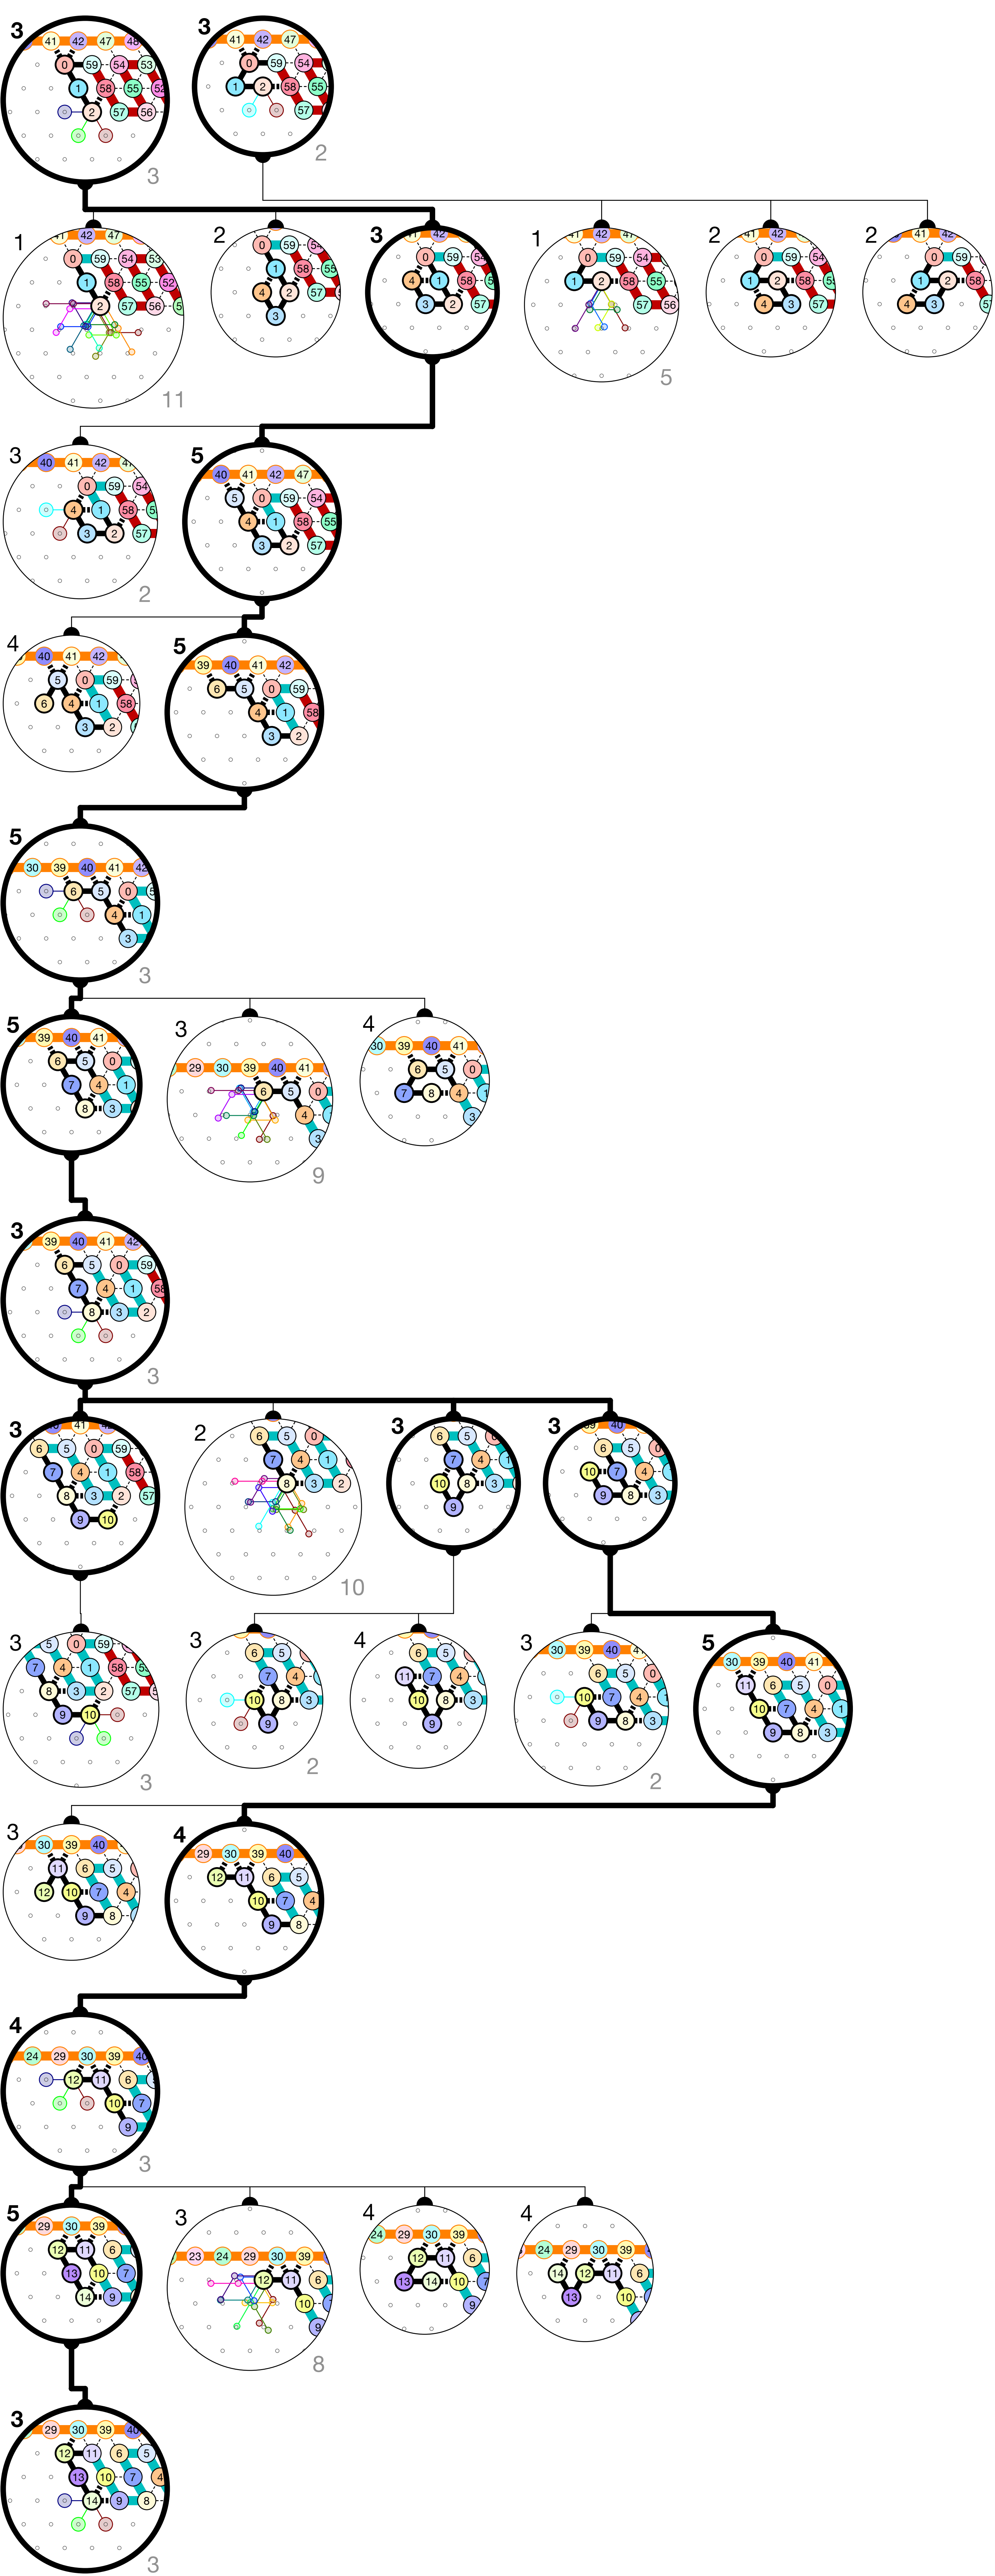

Supplement: s2 [file s2]

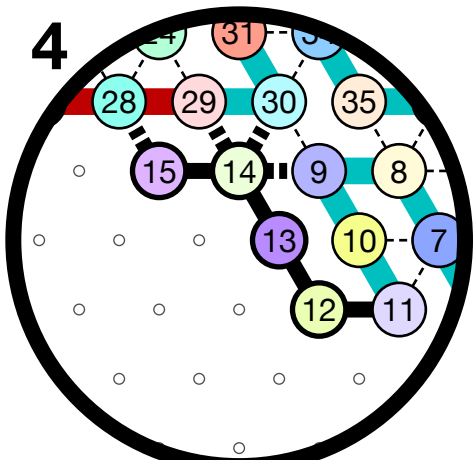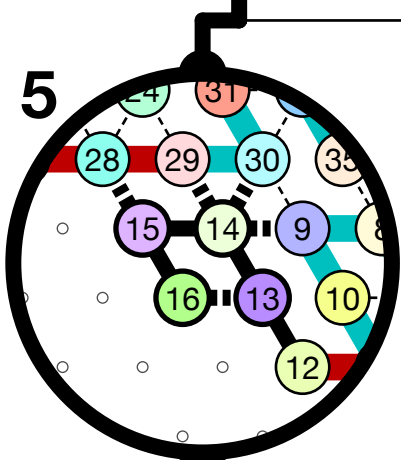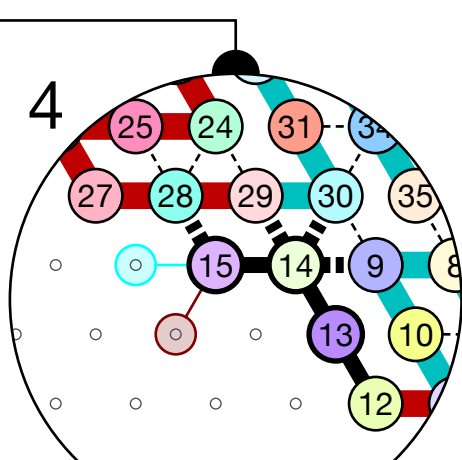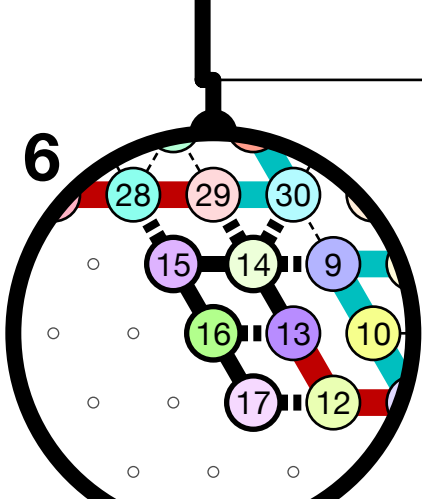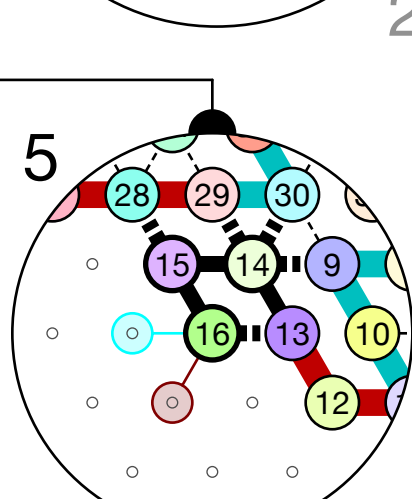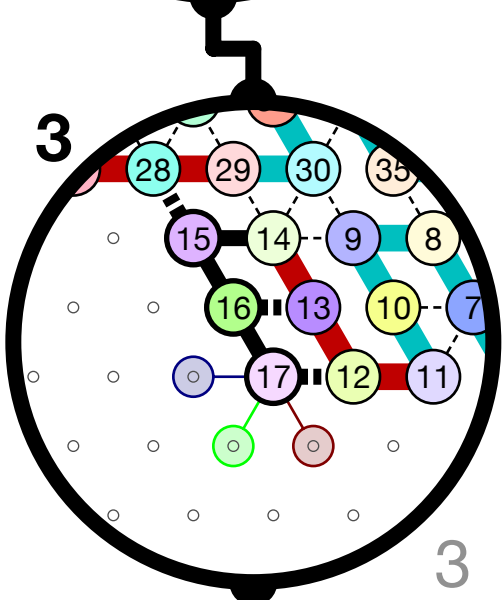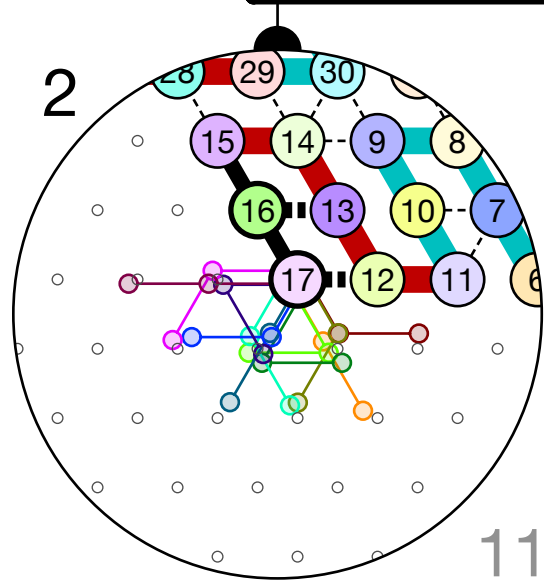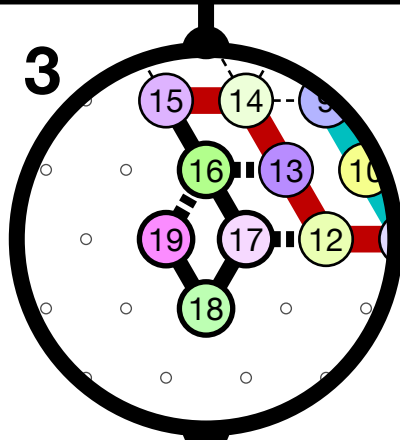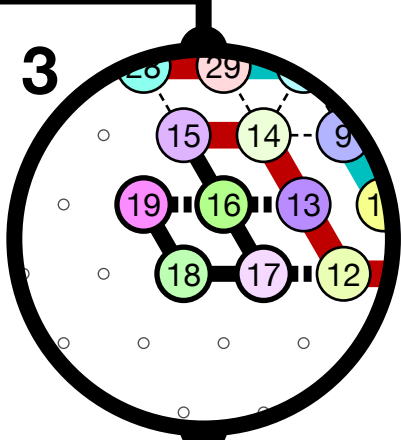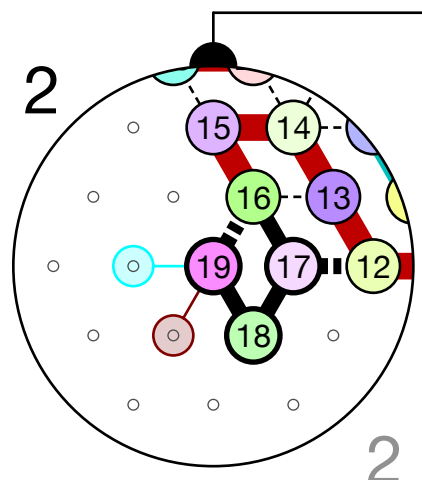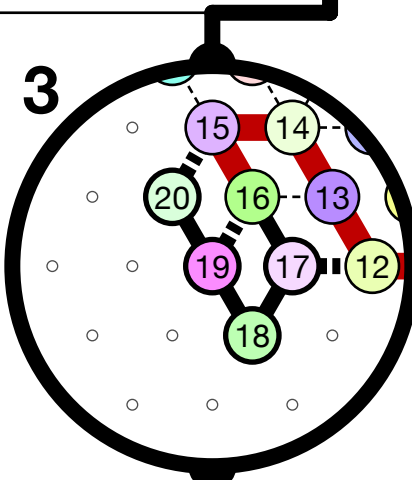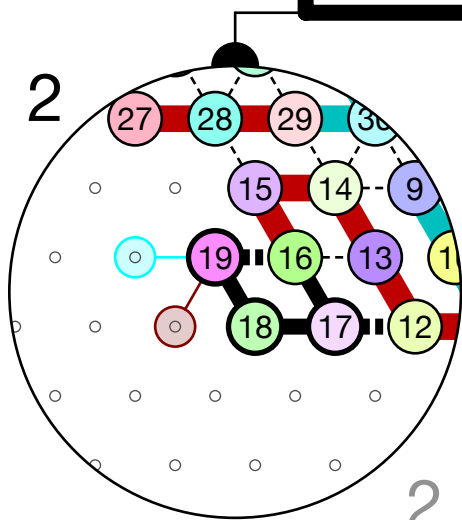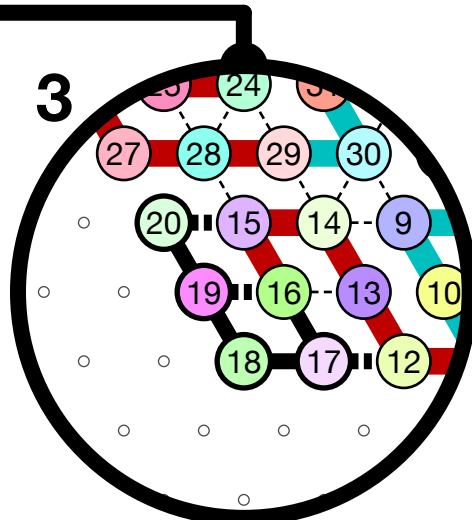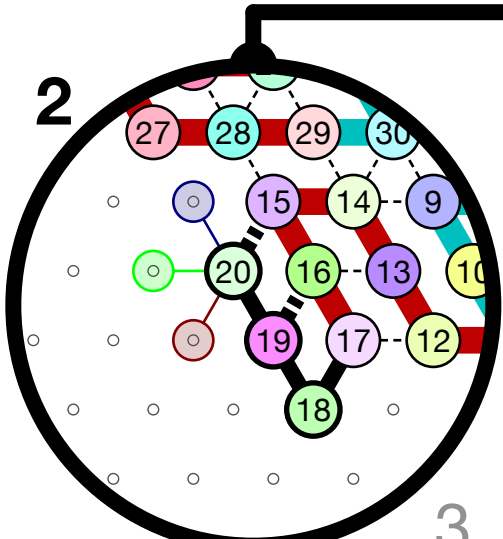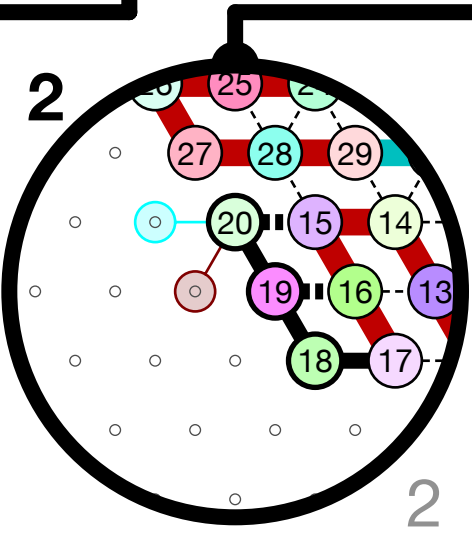

Supplement: s2 [file s2]

1

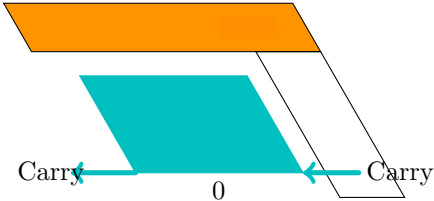

Supplement: s2 [file s2]

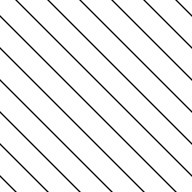

Supplement: s2 [file s2]

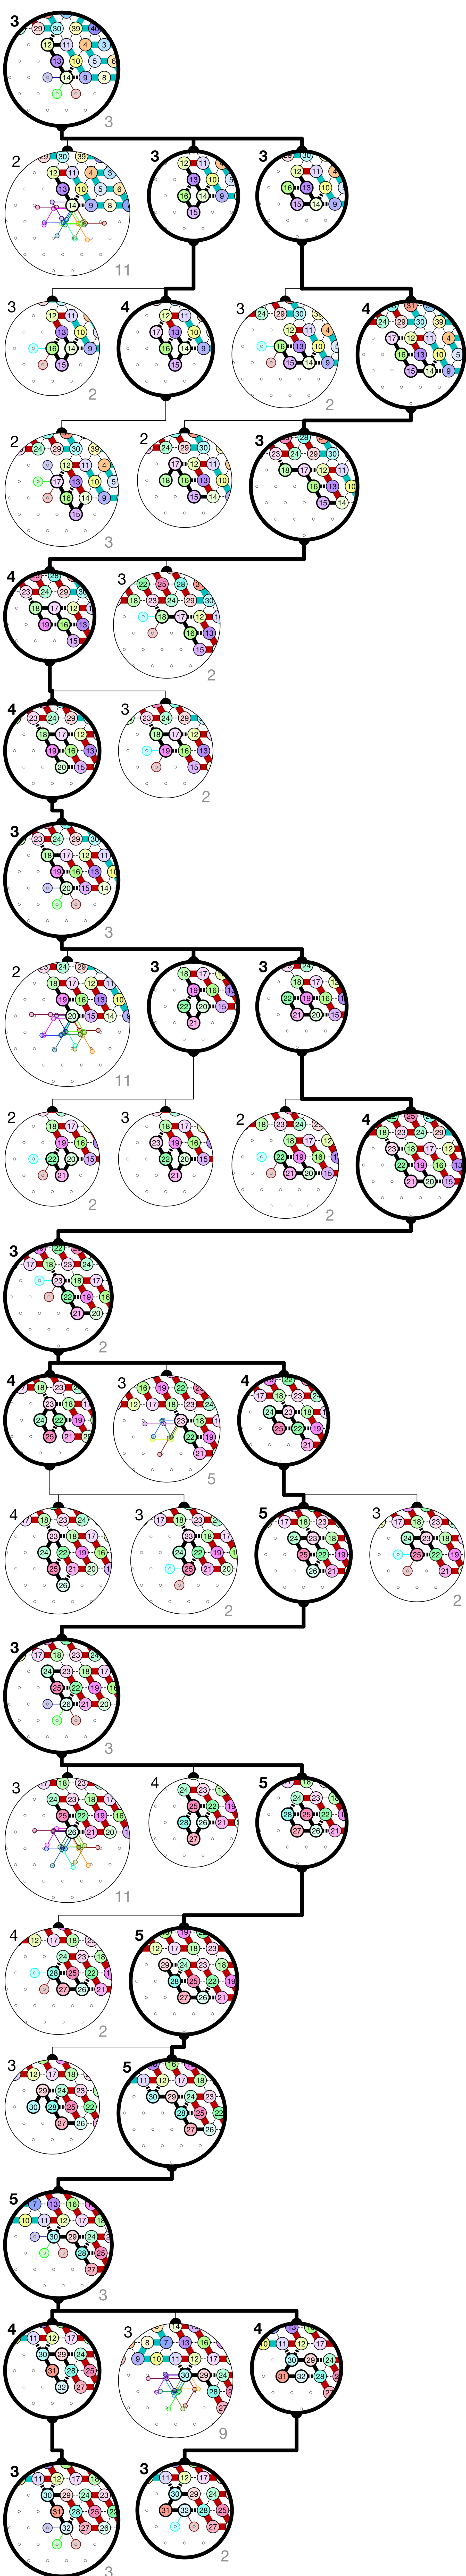

Supplement: s2 [file s2]

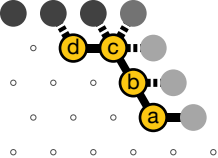

Supplement: s2 [file s2]

4) Beads 42-45

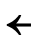

3) Beads 38-41

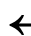

2) Beads 34-37

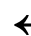

1) Beads 30-33

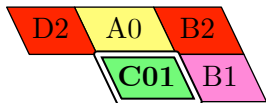

Carry = 0

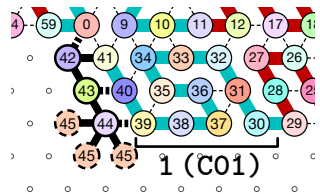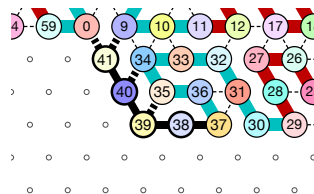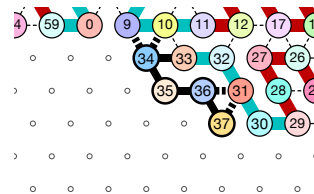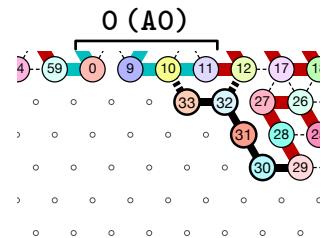

Carry = 1

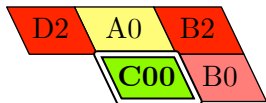

Carry = 0

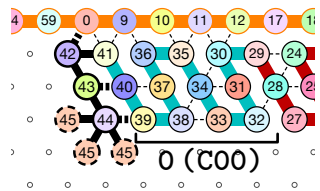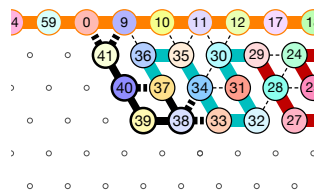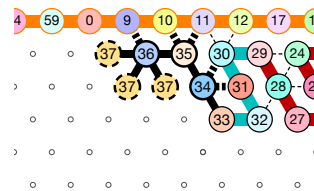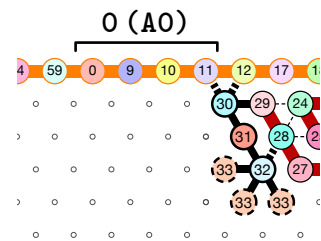

Carry = 0

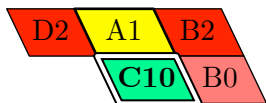

Carry = 0

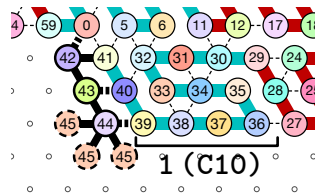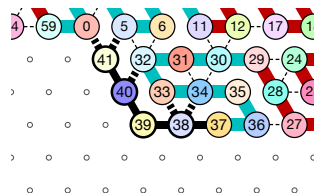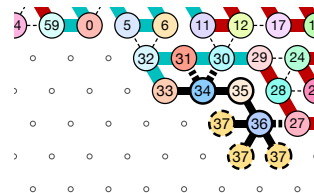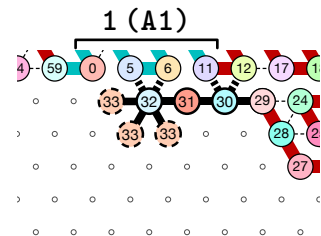

Carry = 0

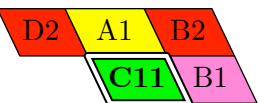

Carry = 1

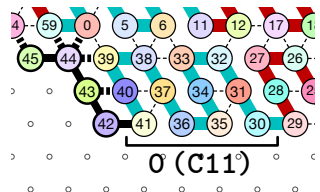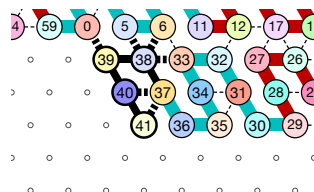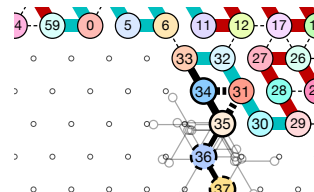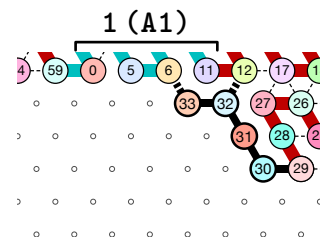

Carry = 1

Supplement: s2 [file s2]

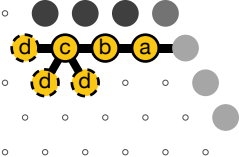

Supplement: s2 [file s2]

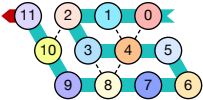

Supplement: s2 [file s2]

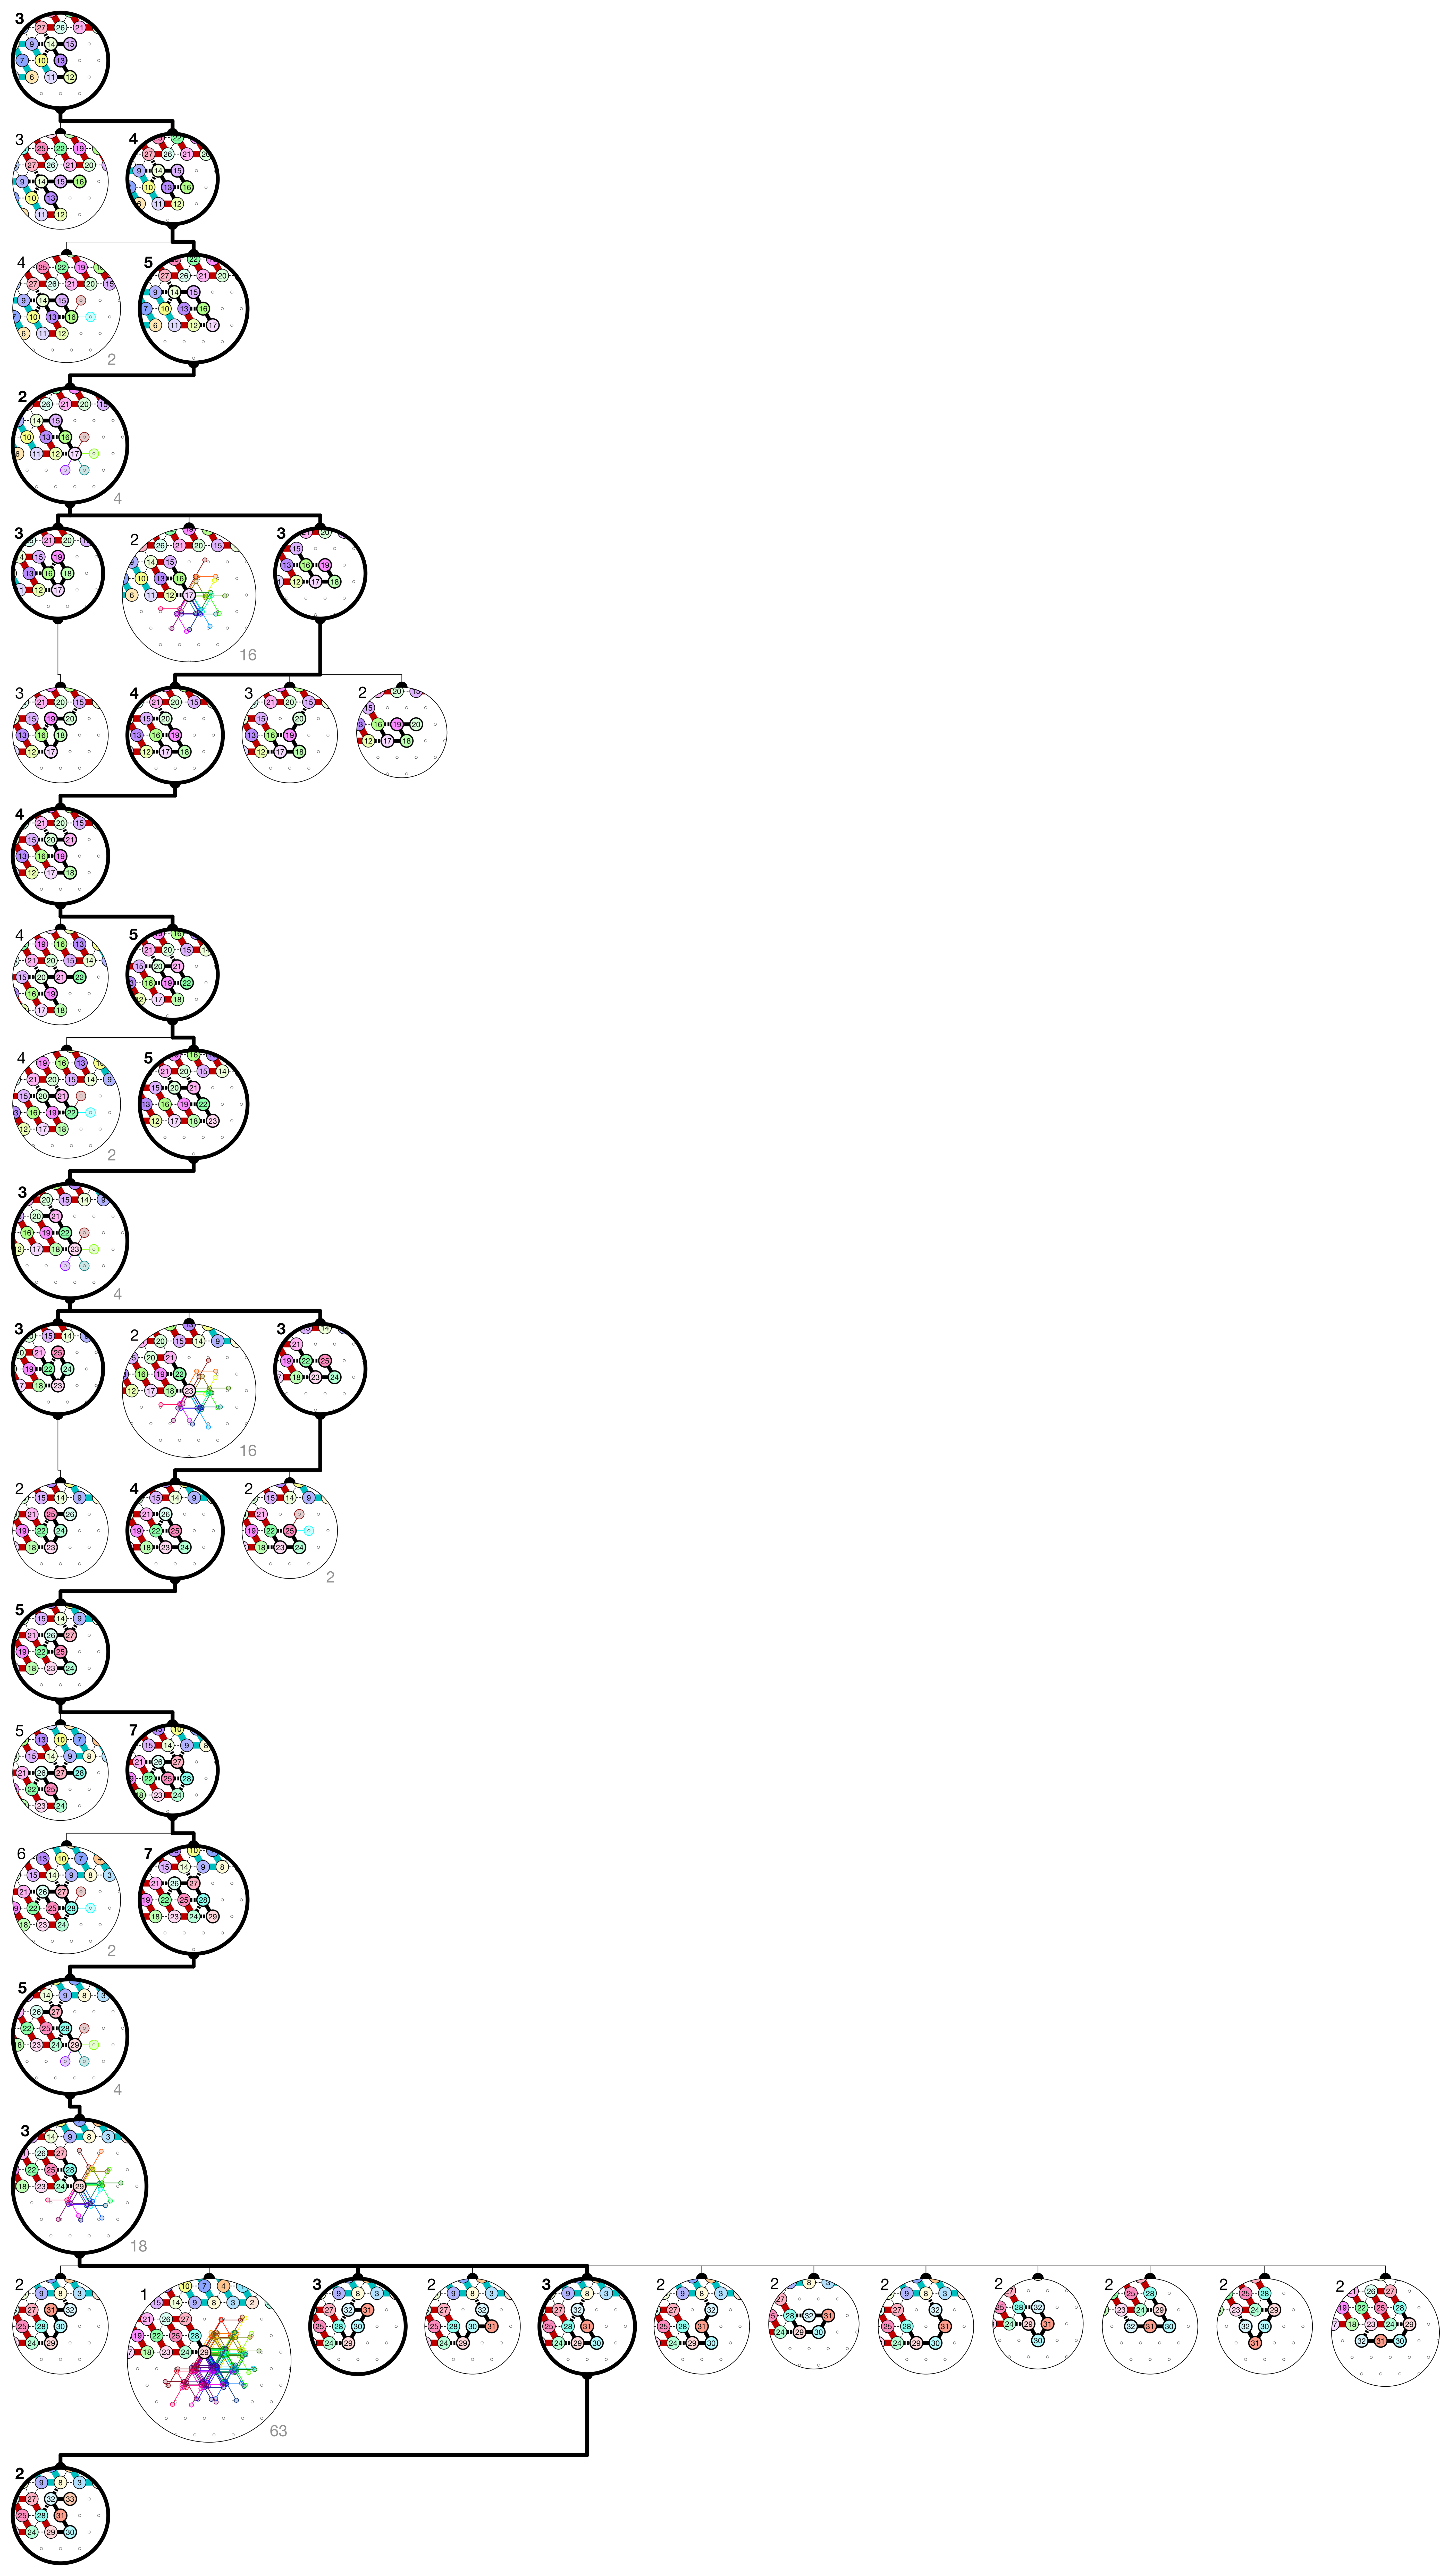

Supplement: s2 [file s2]

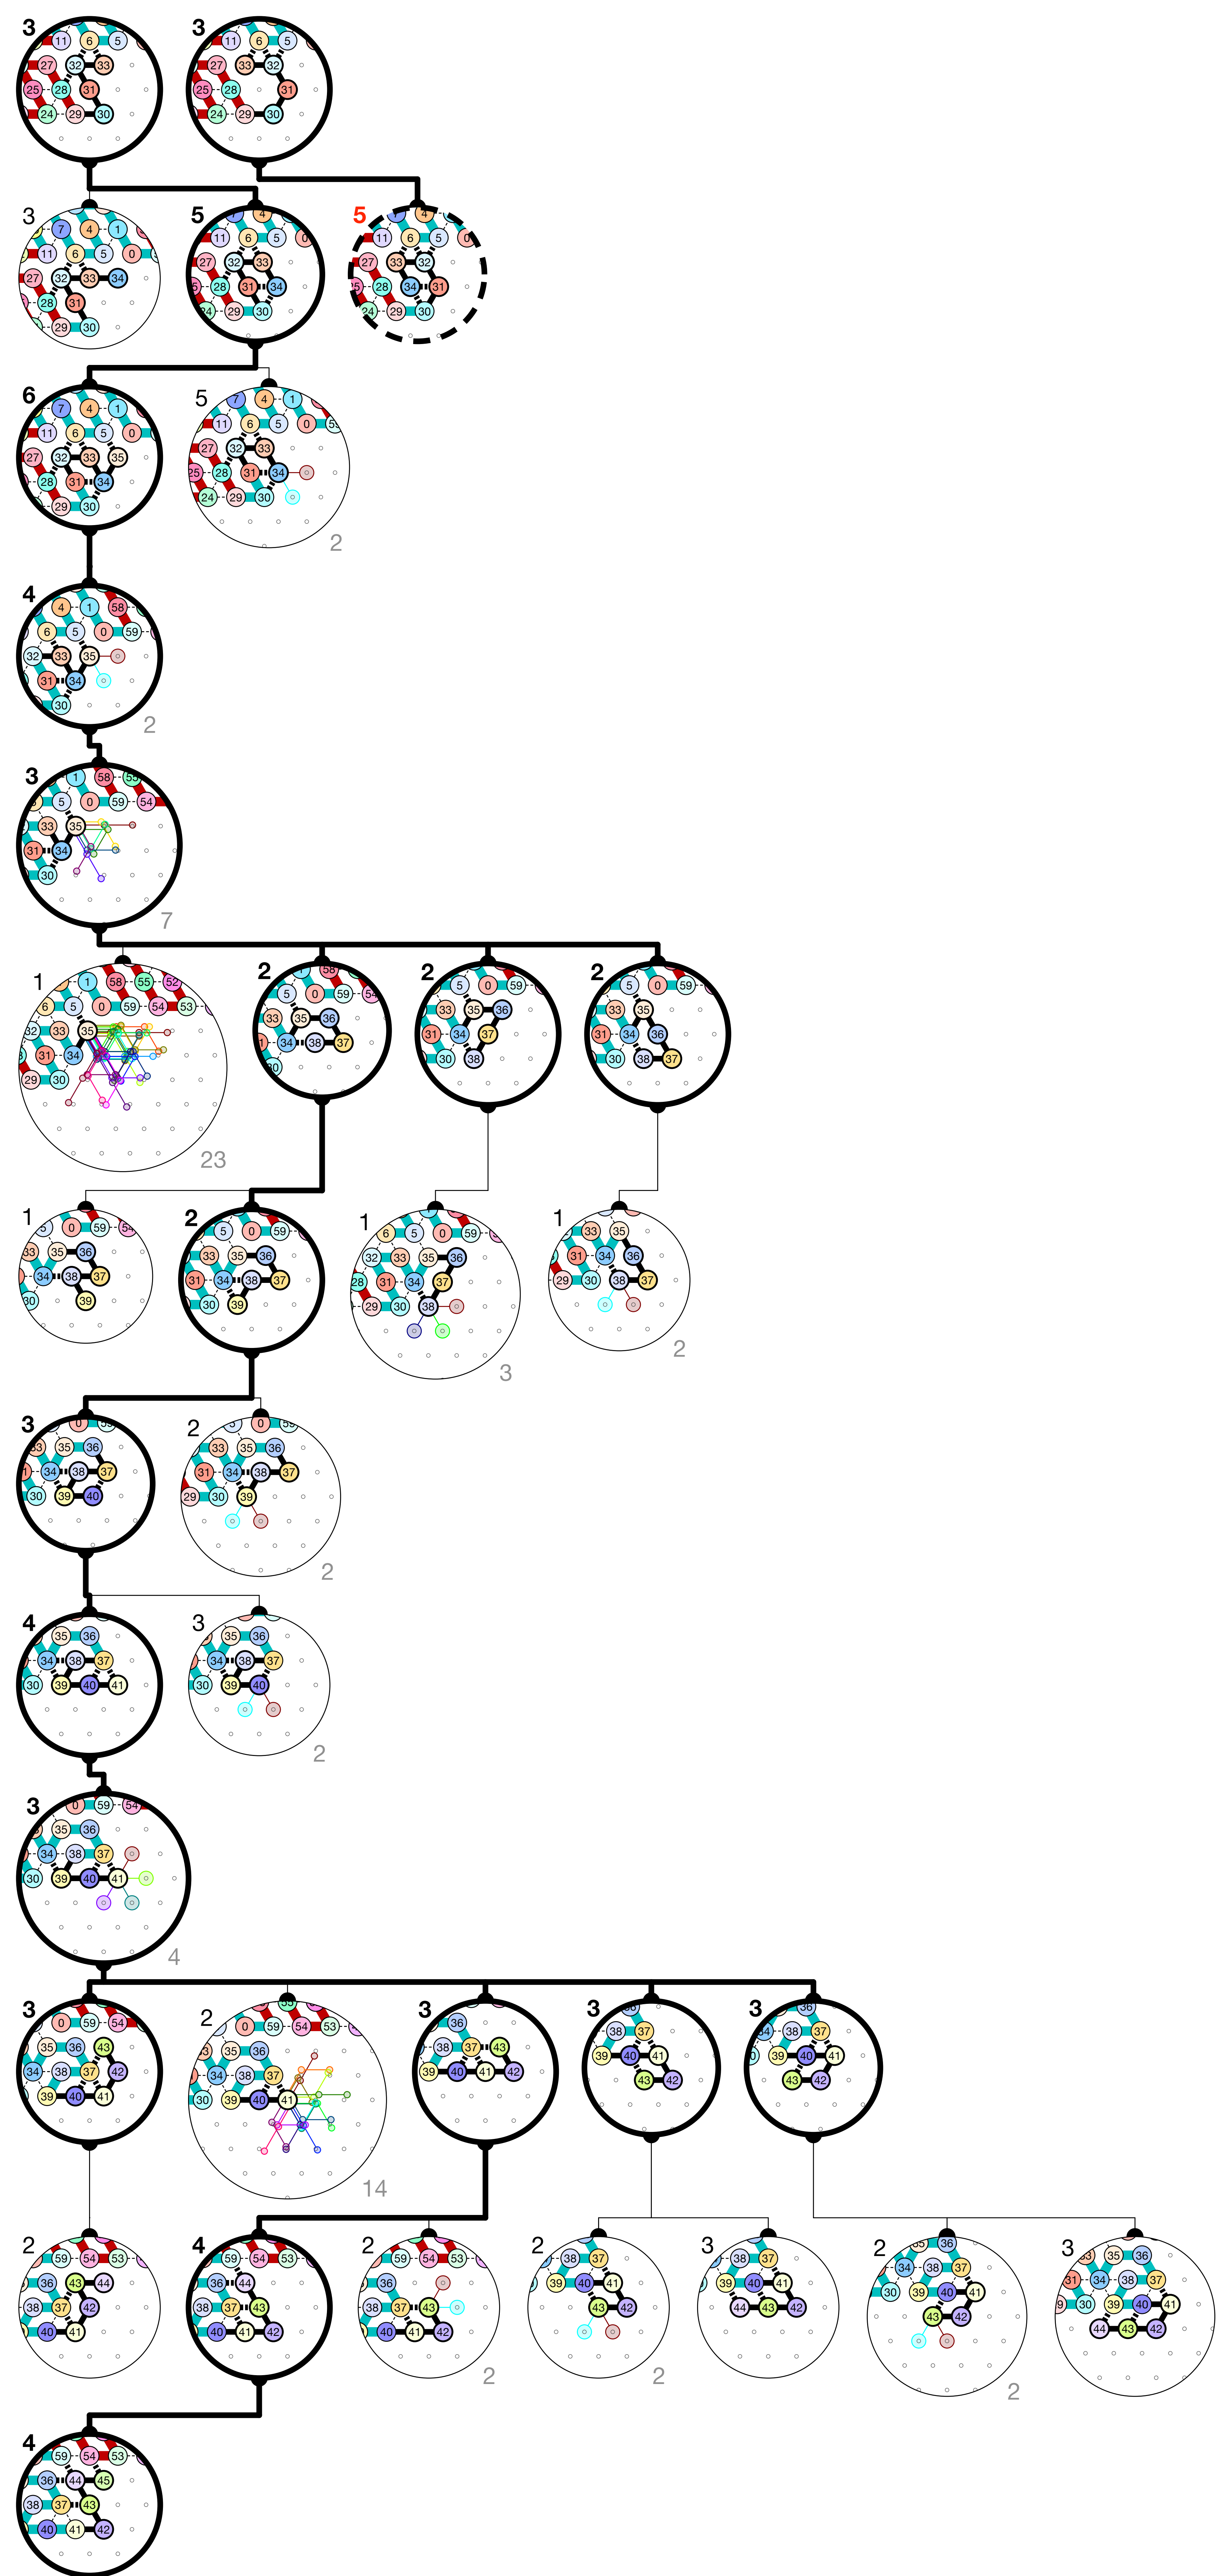

Supplement: s2 [file s2]

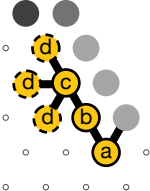

Supplement: s2 [file s2]

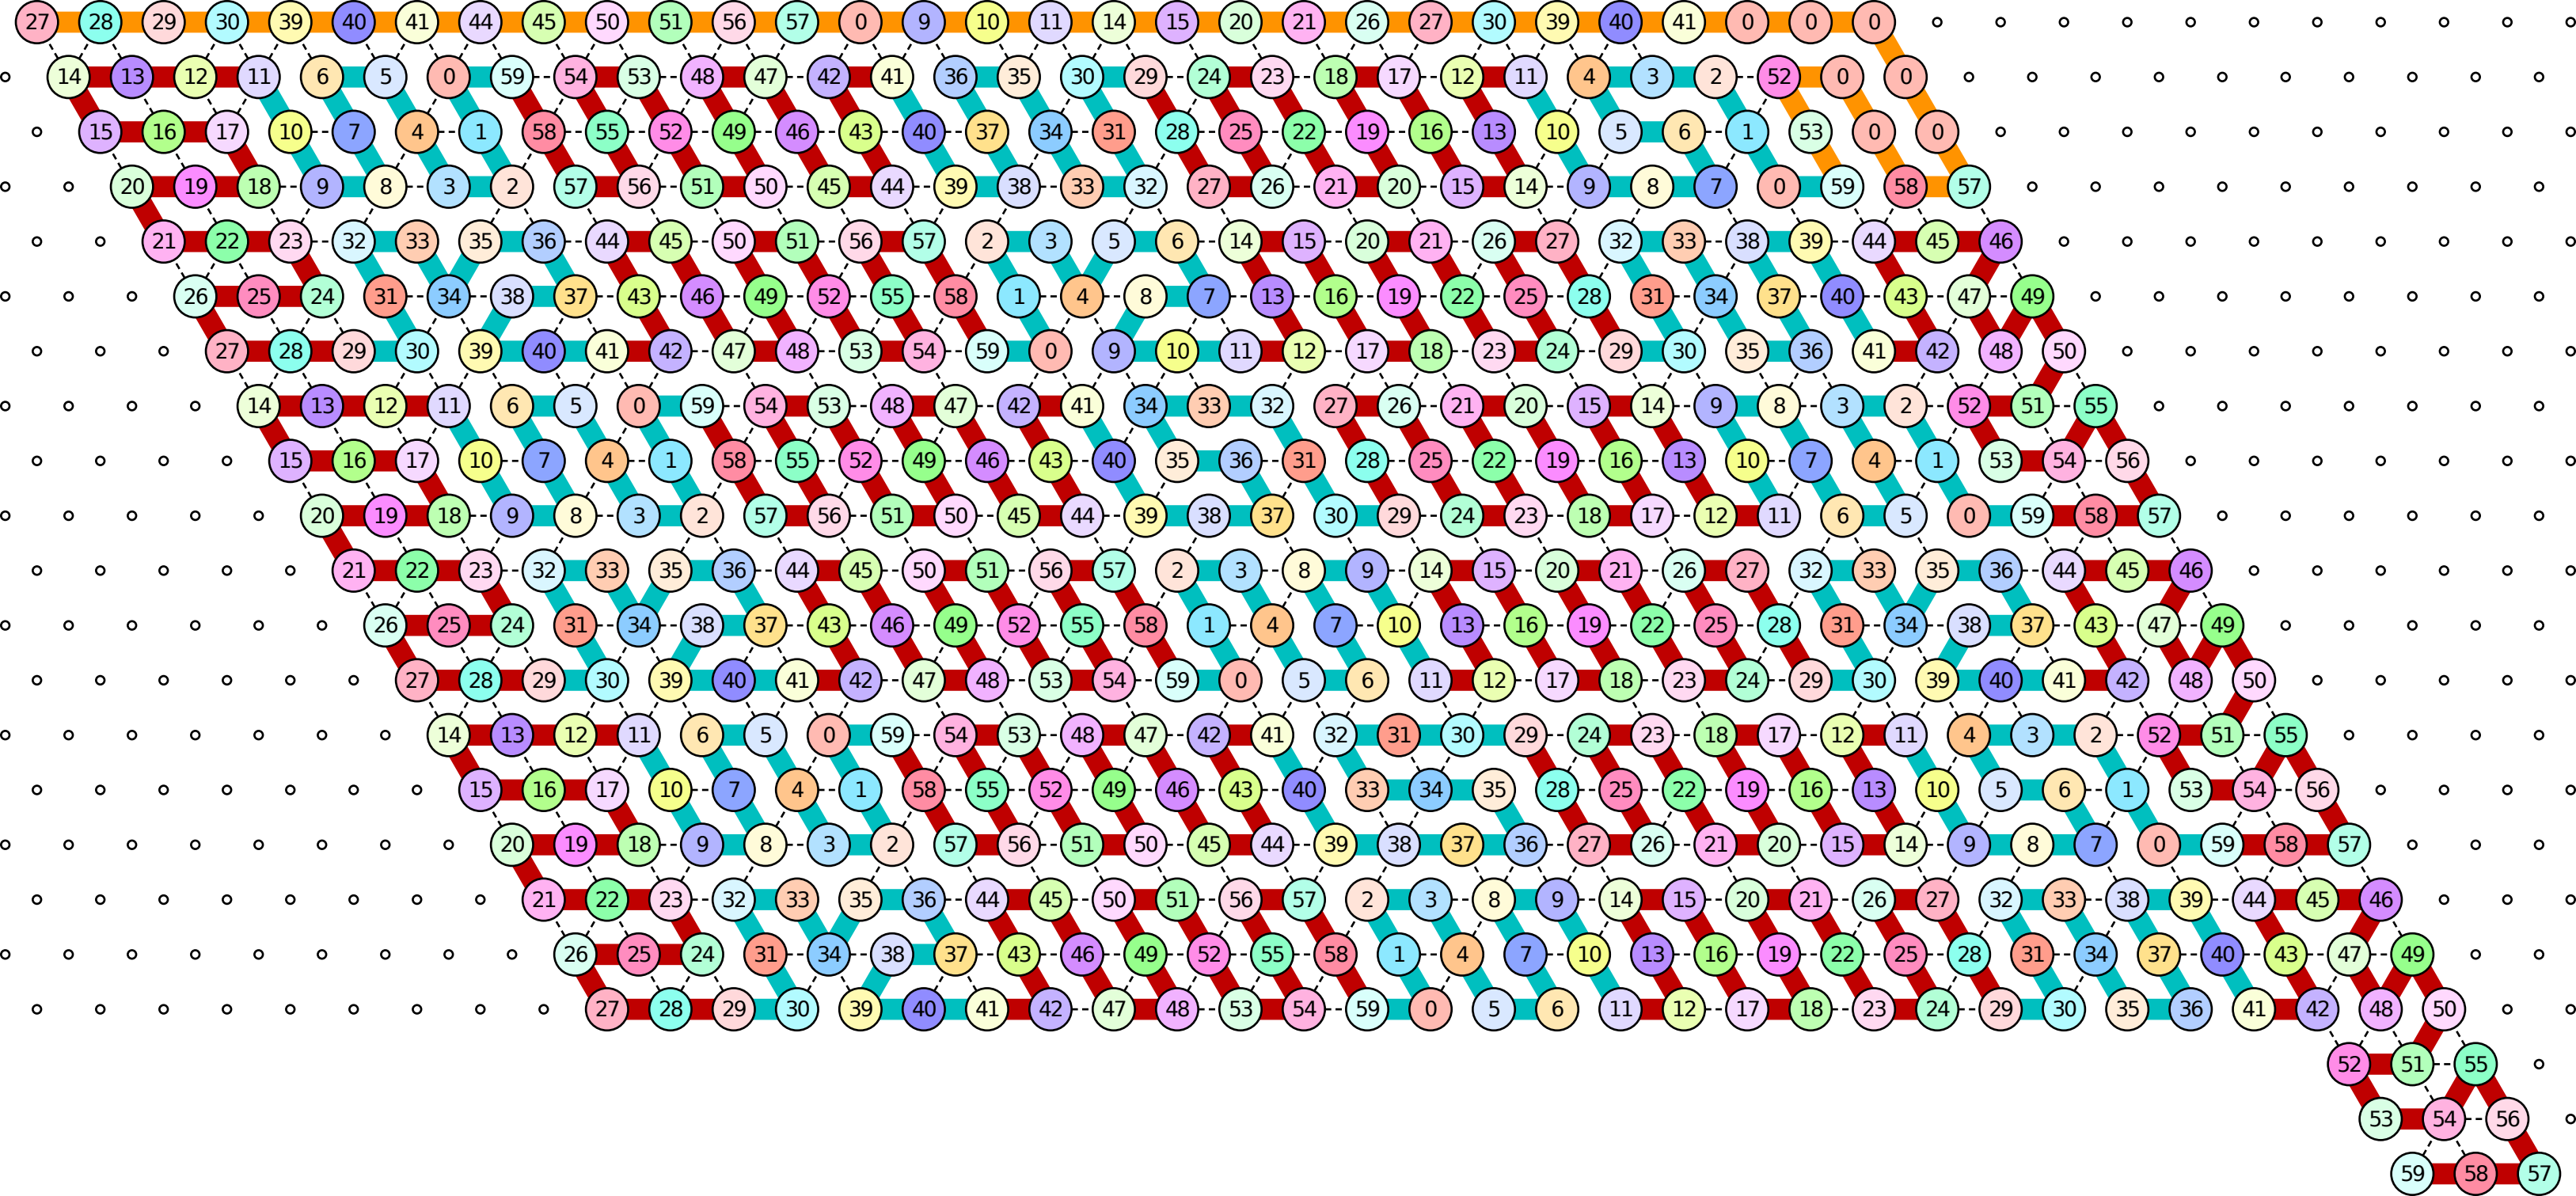

Supplement: s2 [file s2]

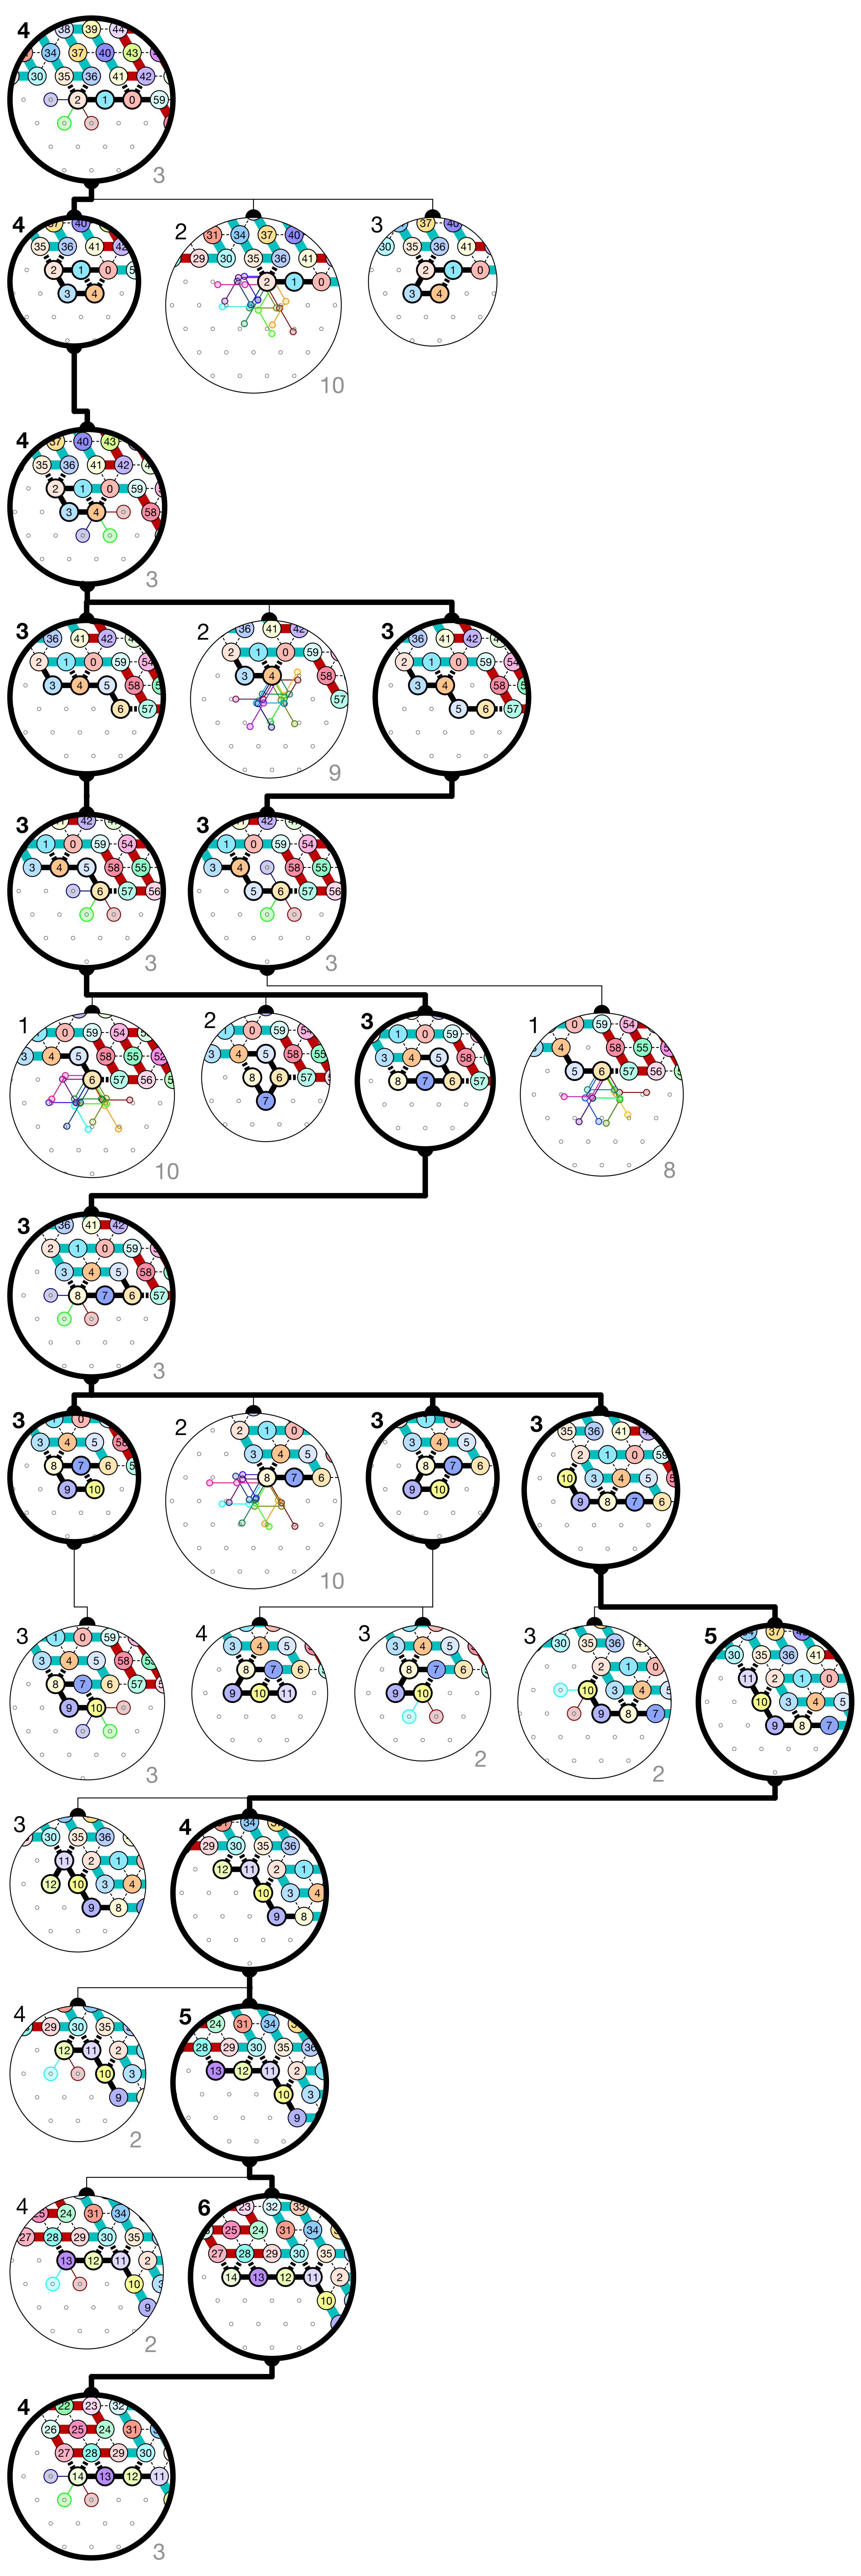

Supplement: s2 [file s2]

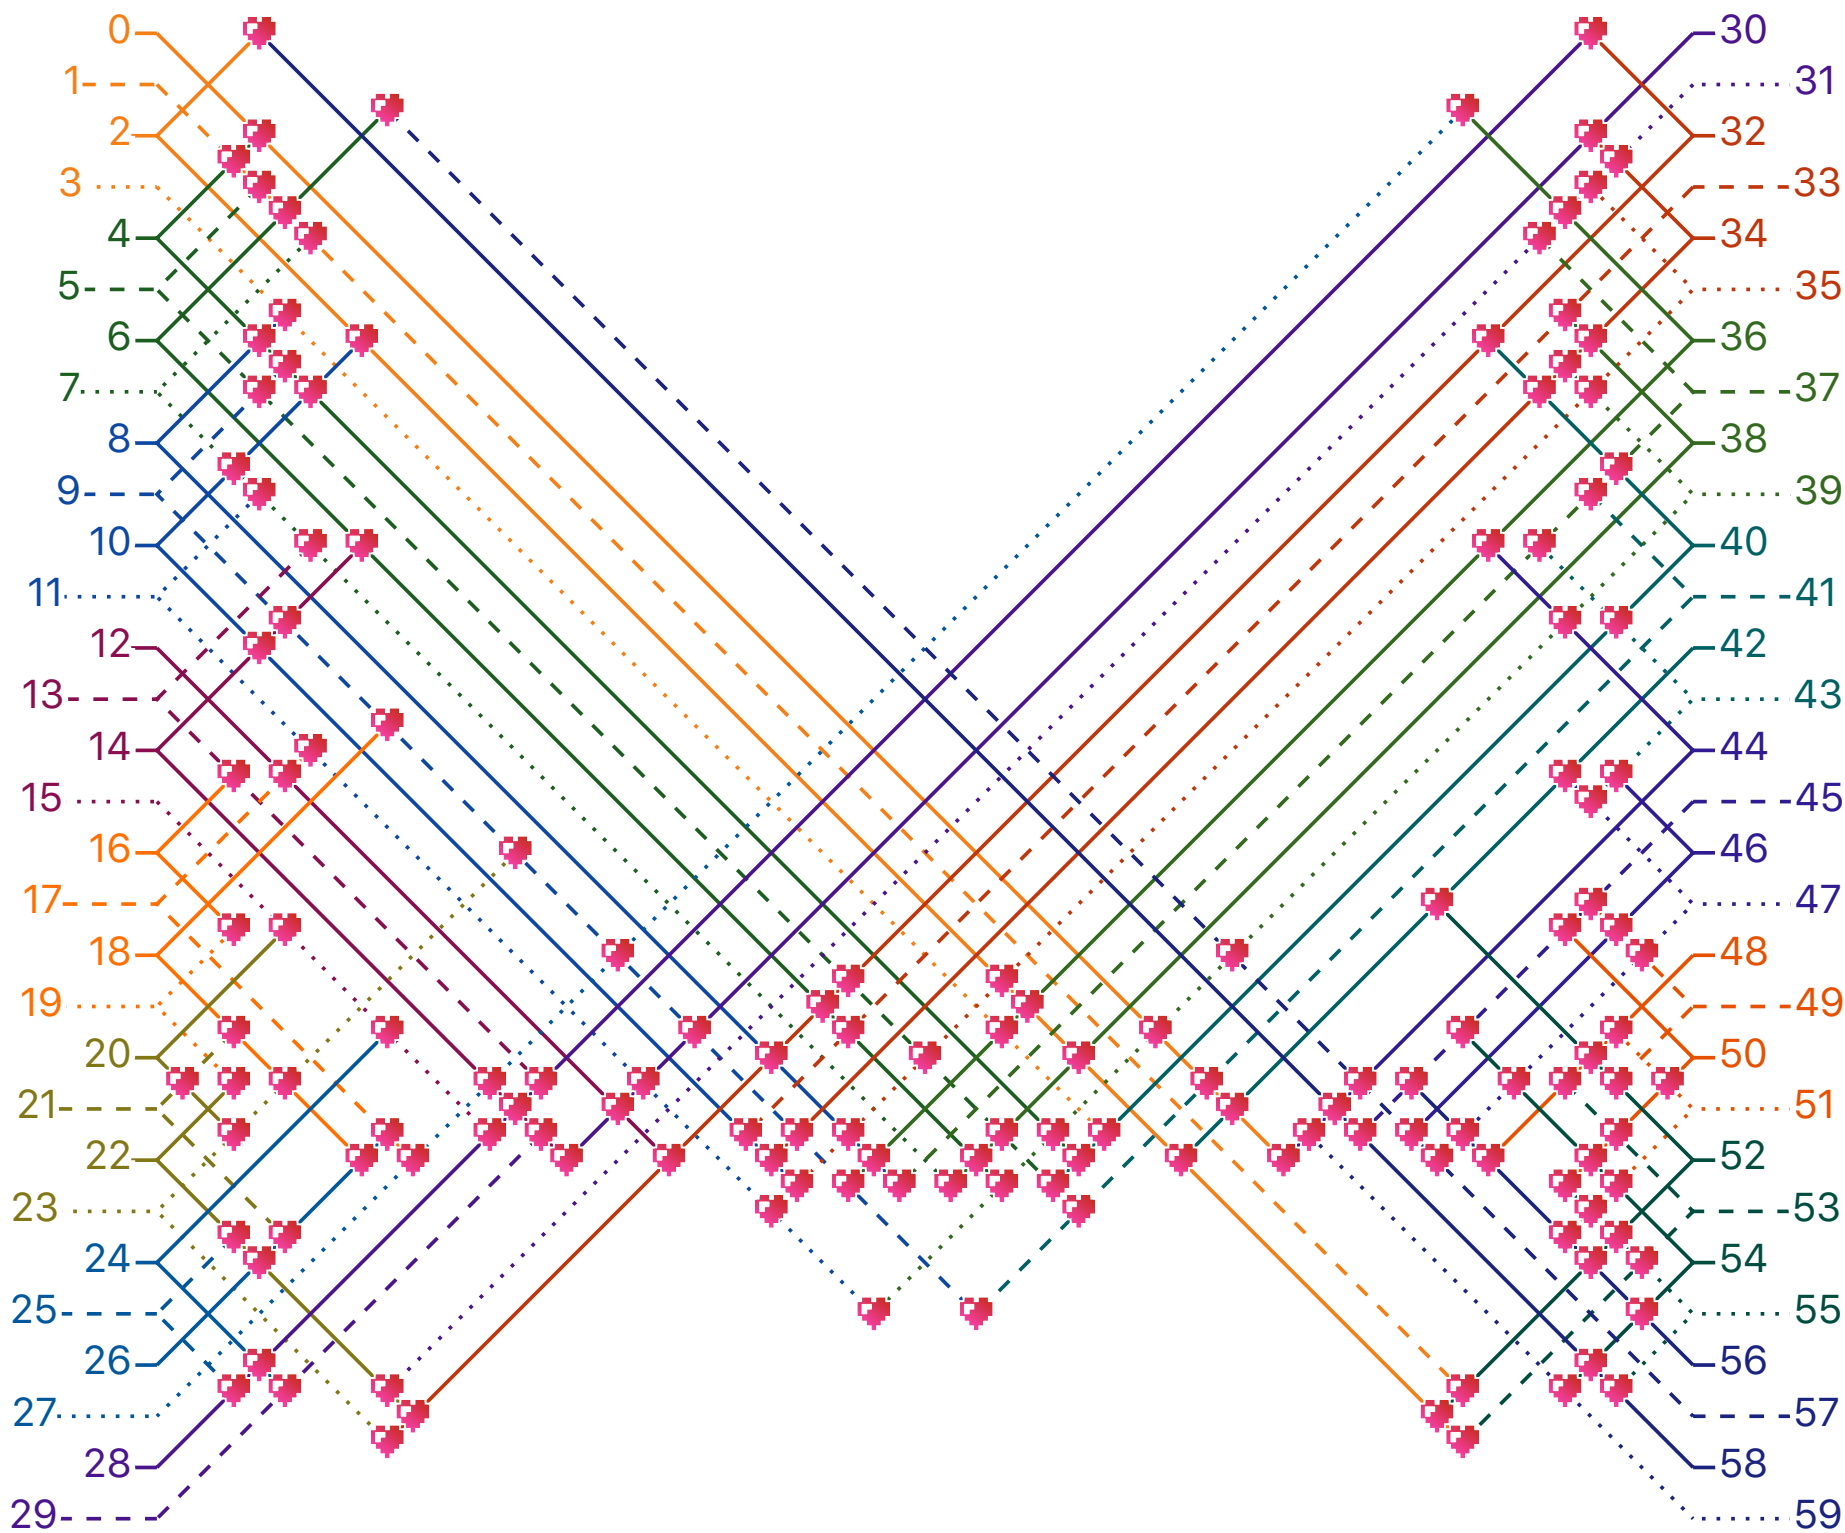

Supplement: s2 [file s2]

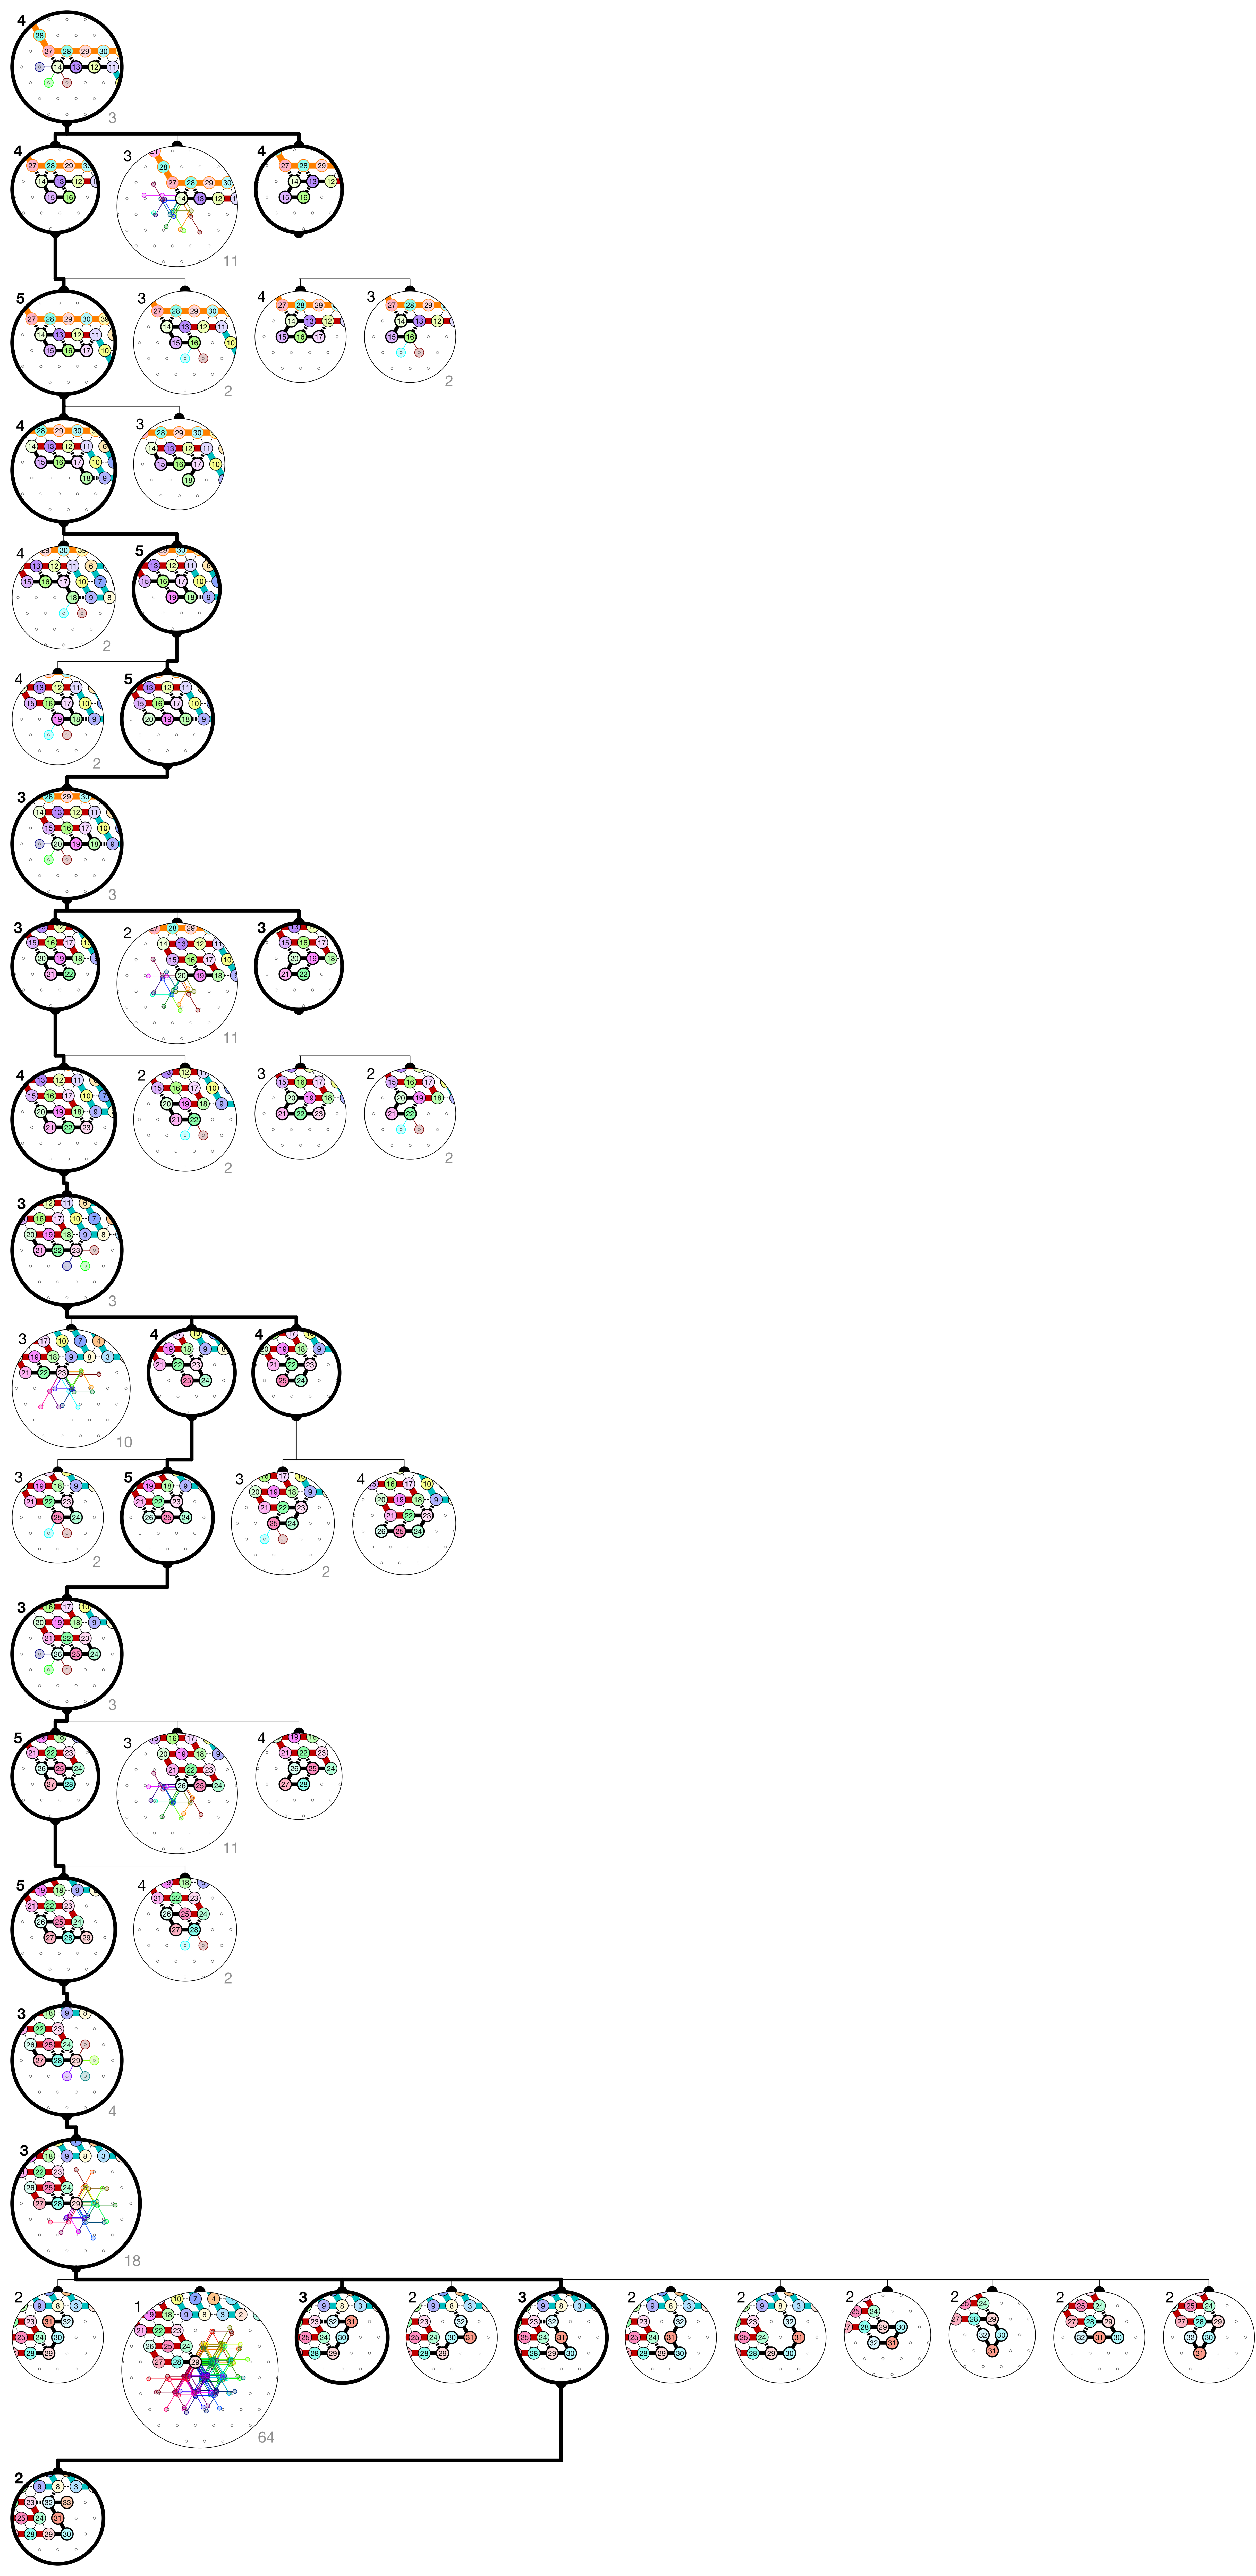

Supplement: s2 [file s2]

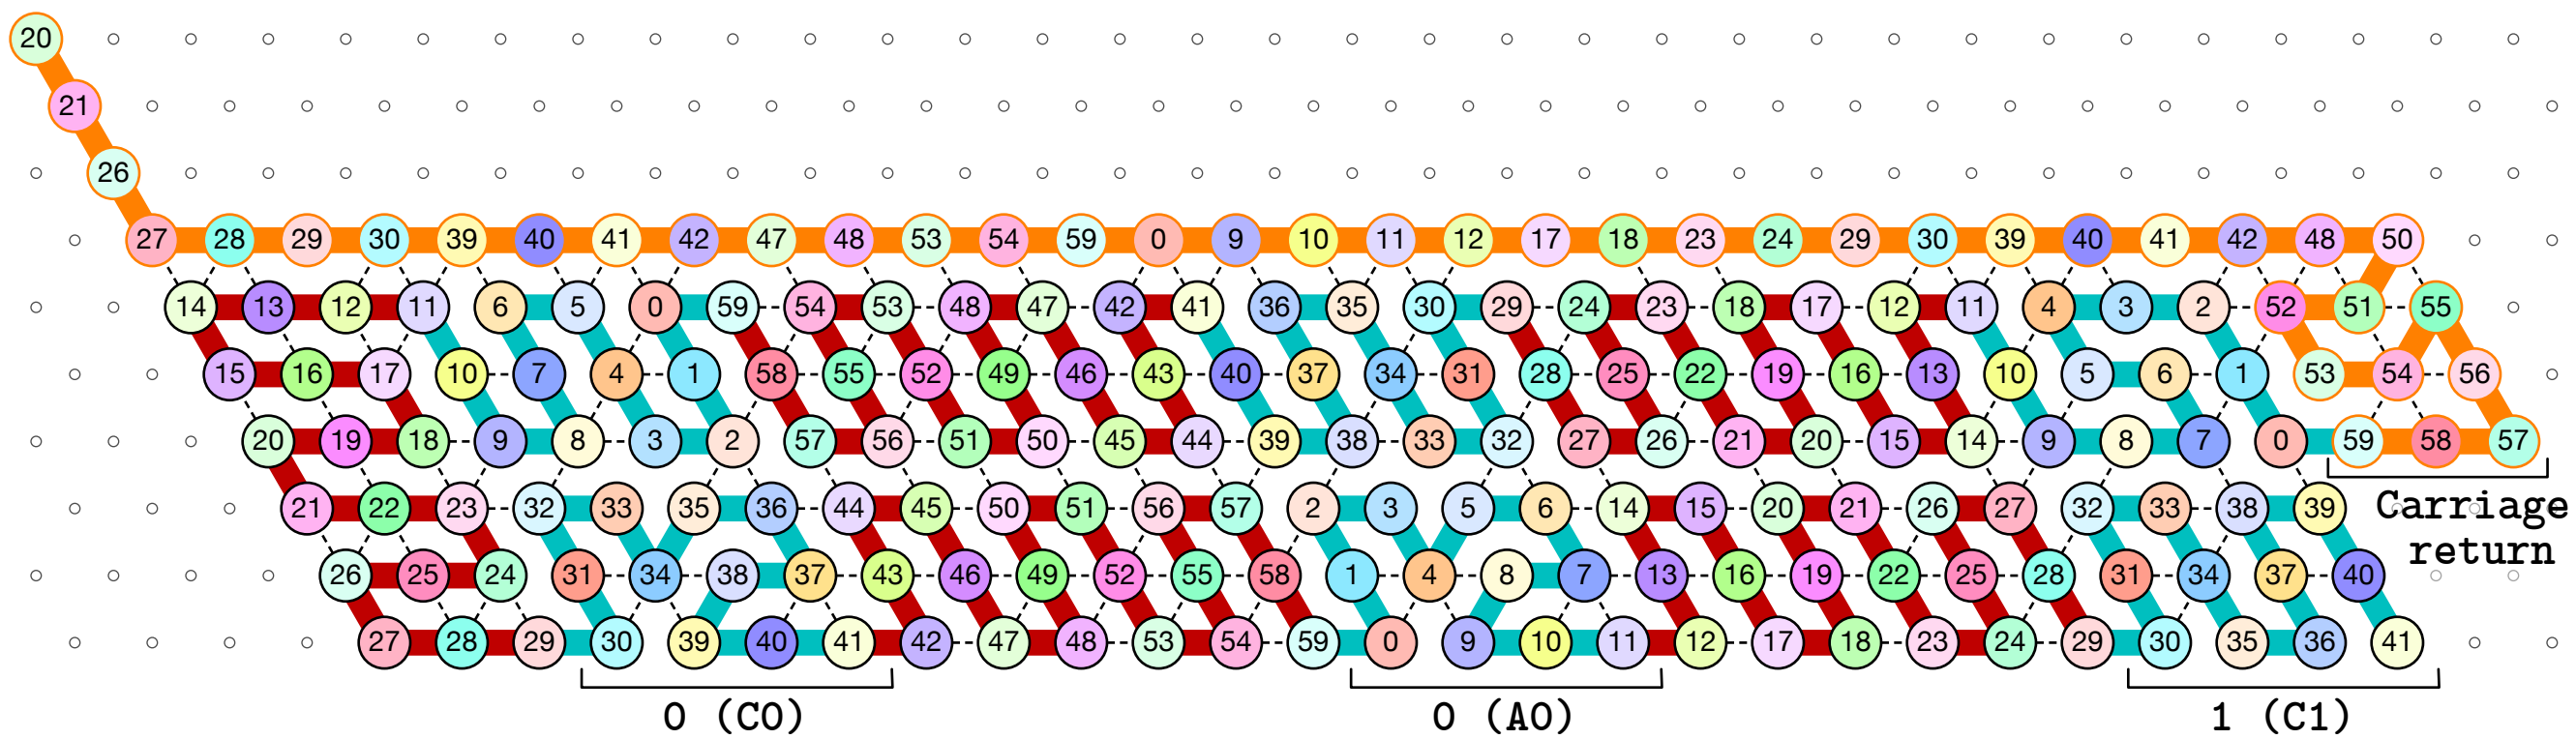

Supplement: s2 [file s2]

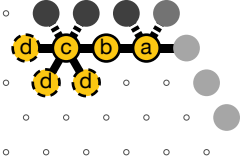

Supplement: s2 [file s2]

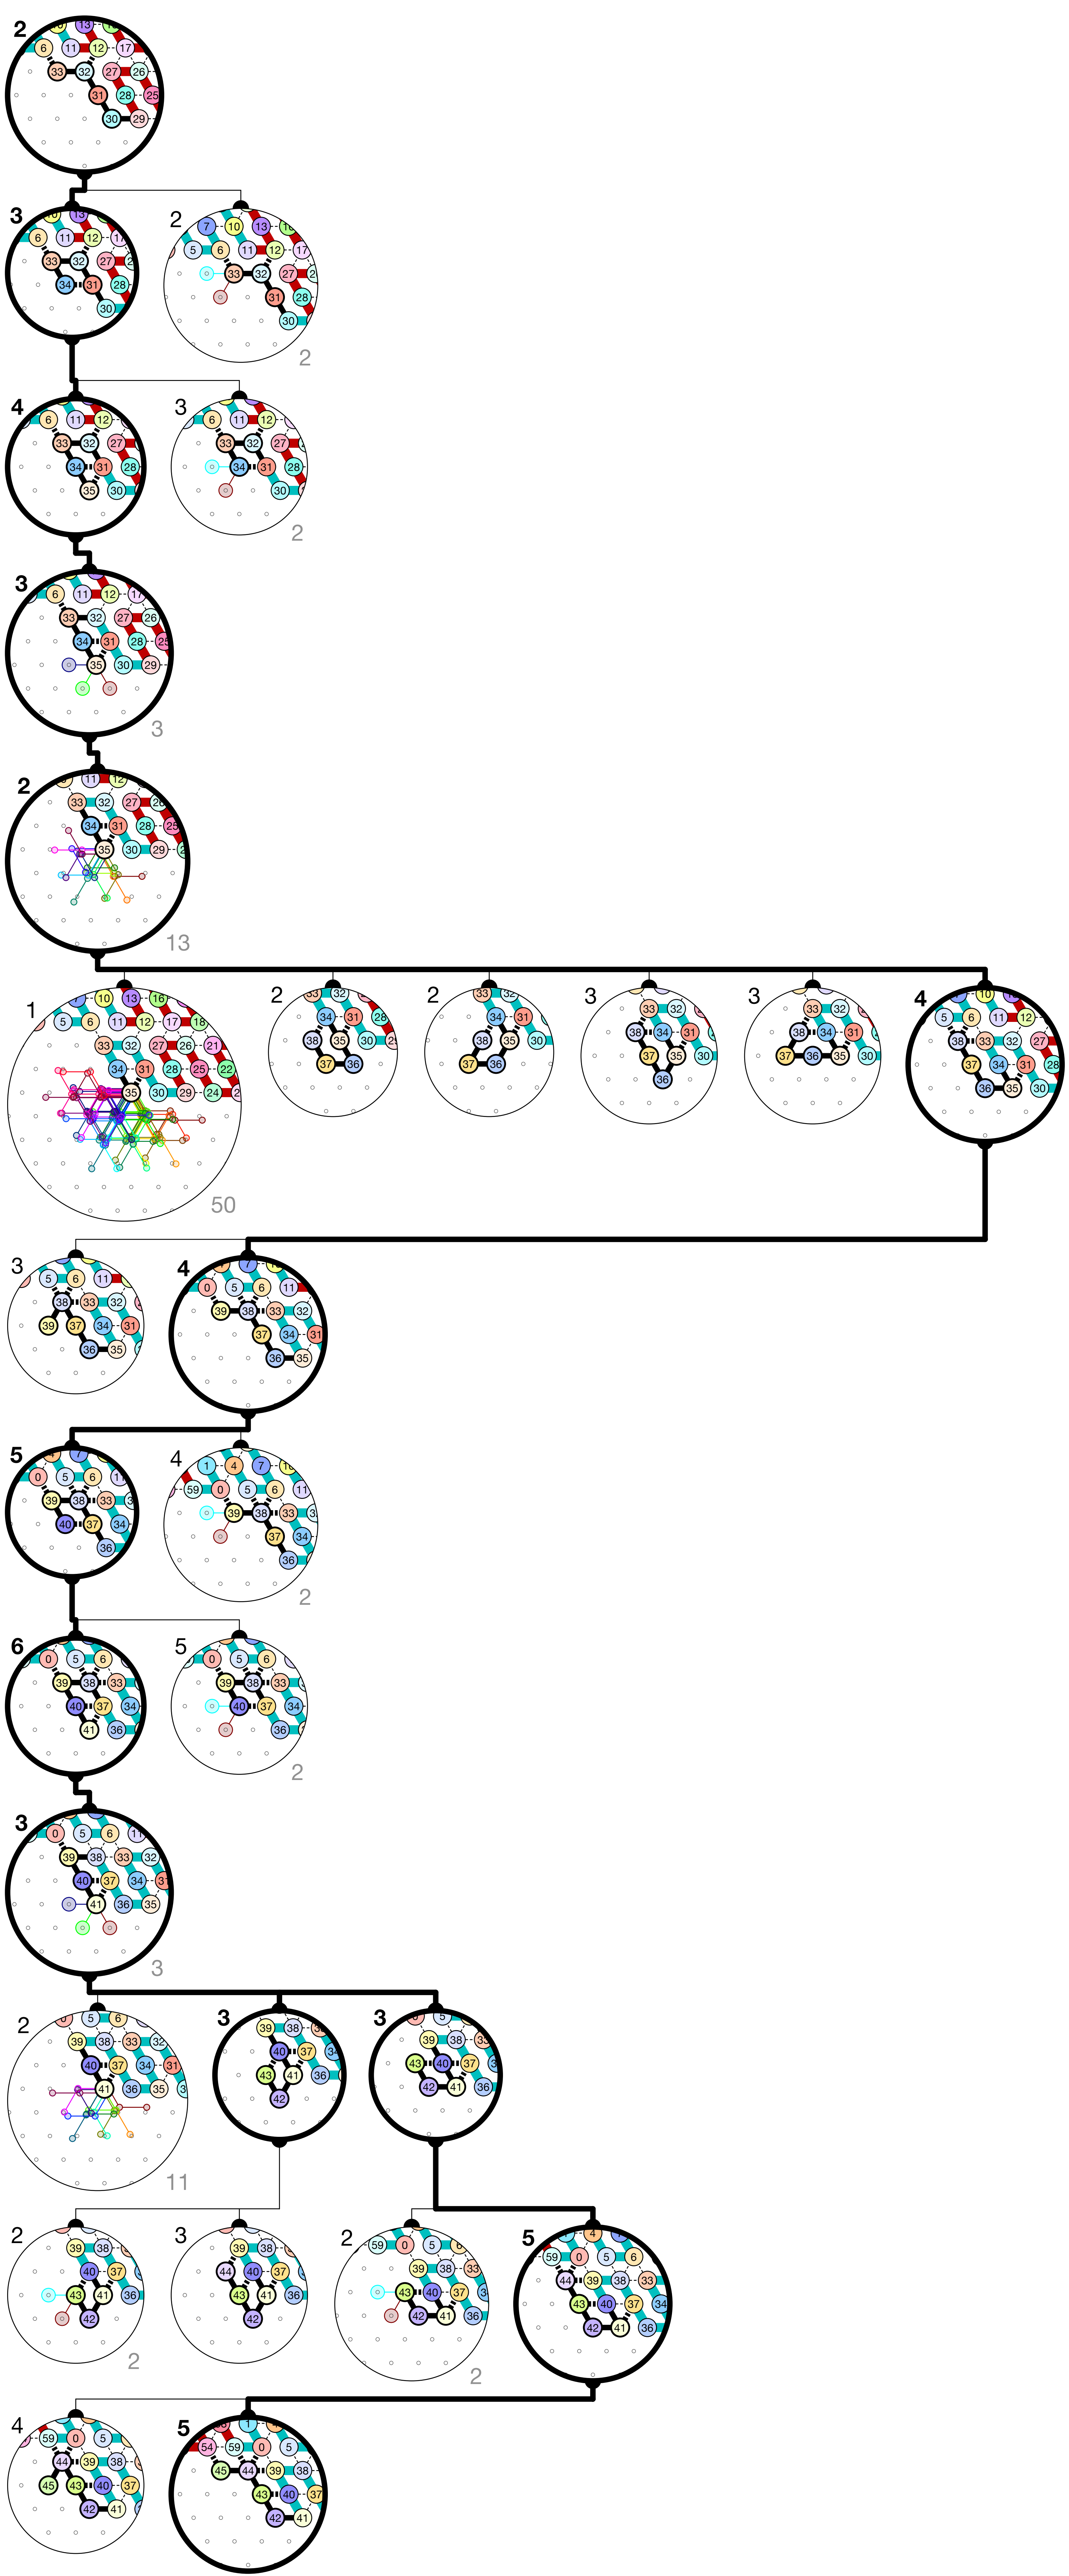

Supplement: s2 [file s2]

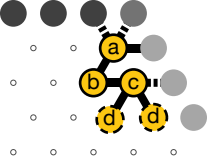

Supplement: s2 [file s2]

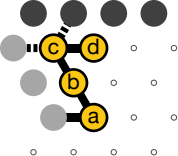

Supplement: s2 [file s2]

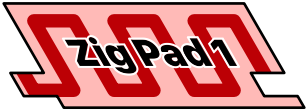

Supplement: s2 [file s2]

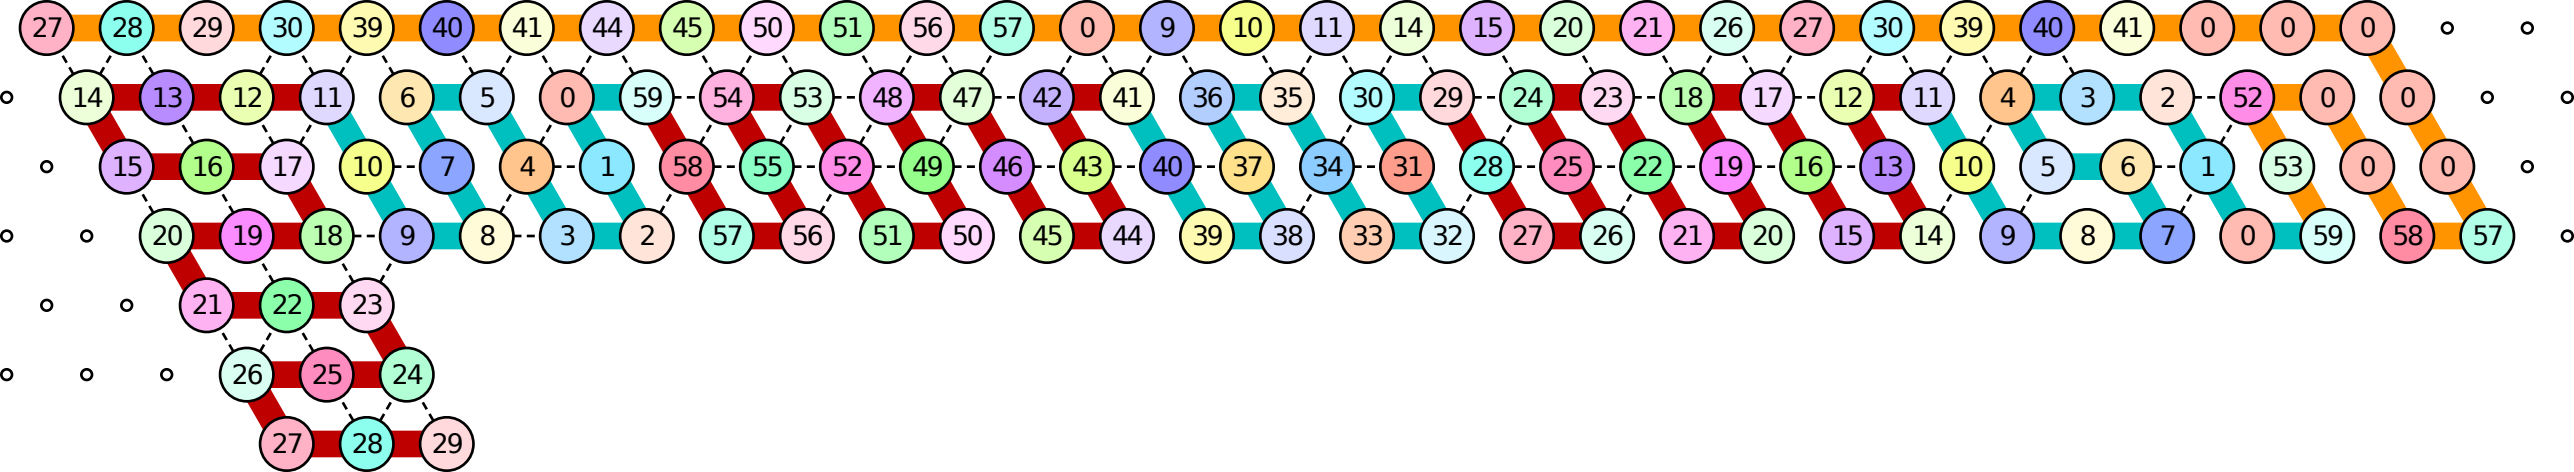

Supplement: s2 [file s2]

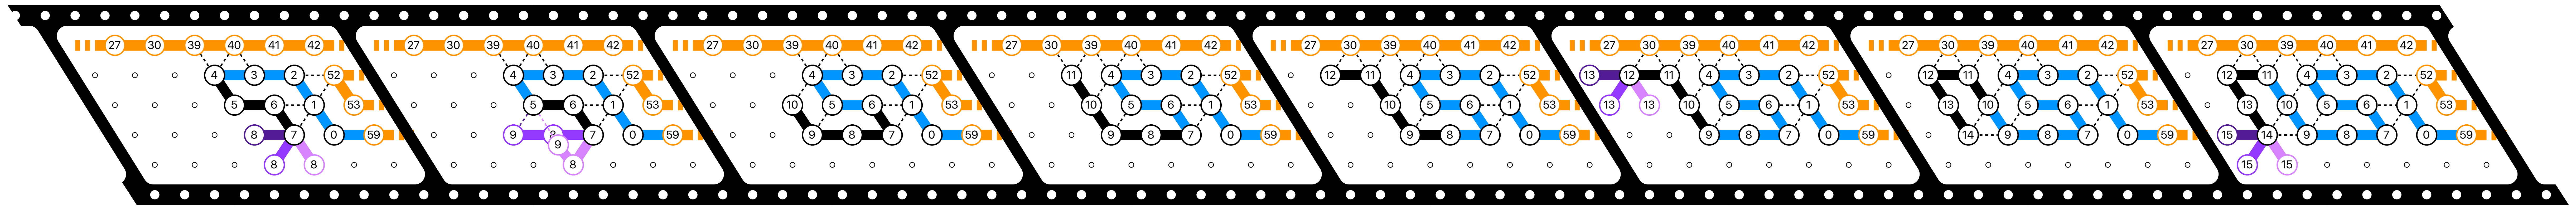

Supplement: s2 [file s2]

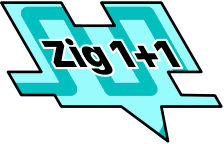

Supplement: s2 [file s2]

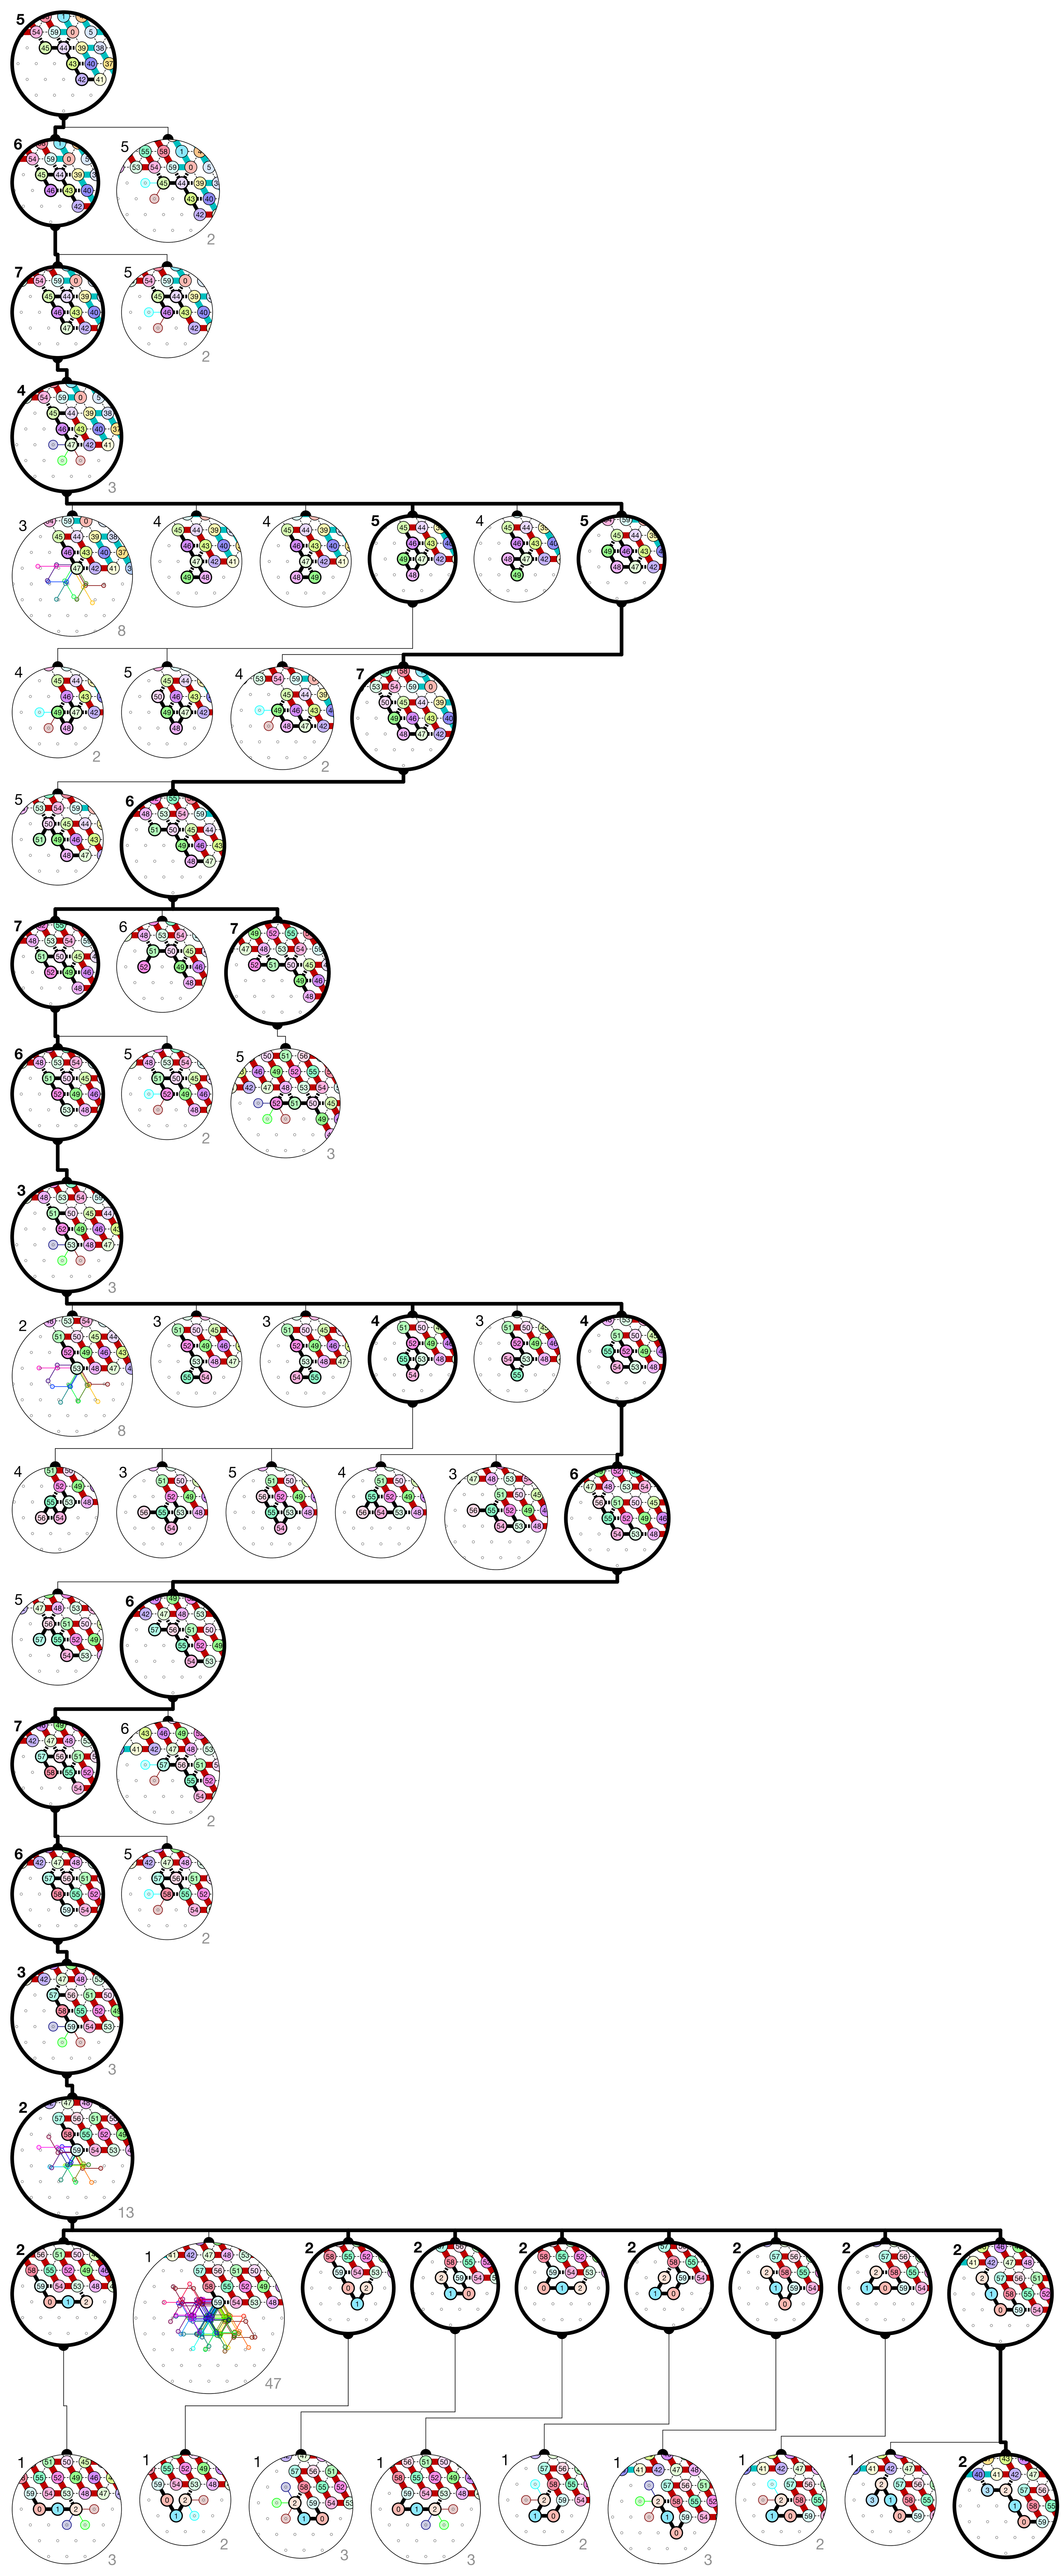

Supplement: s2 [file s2]

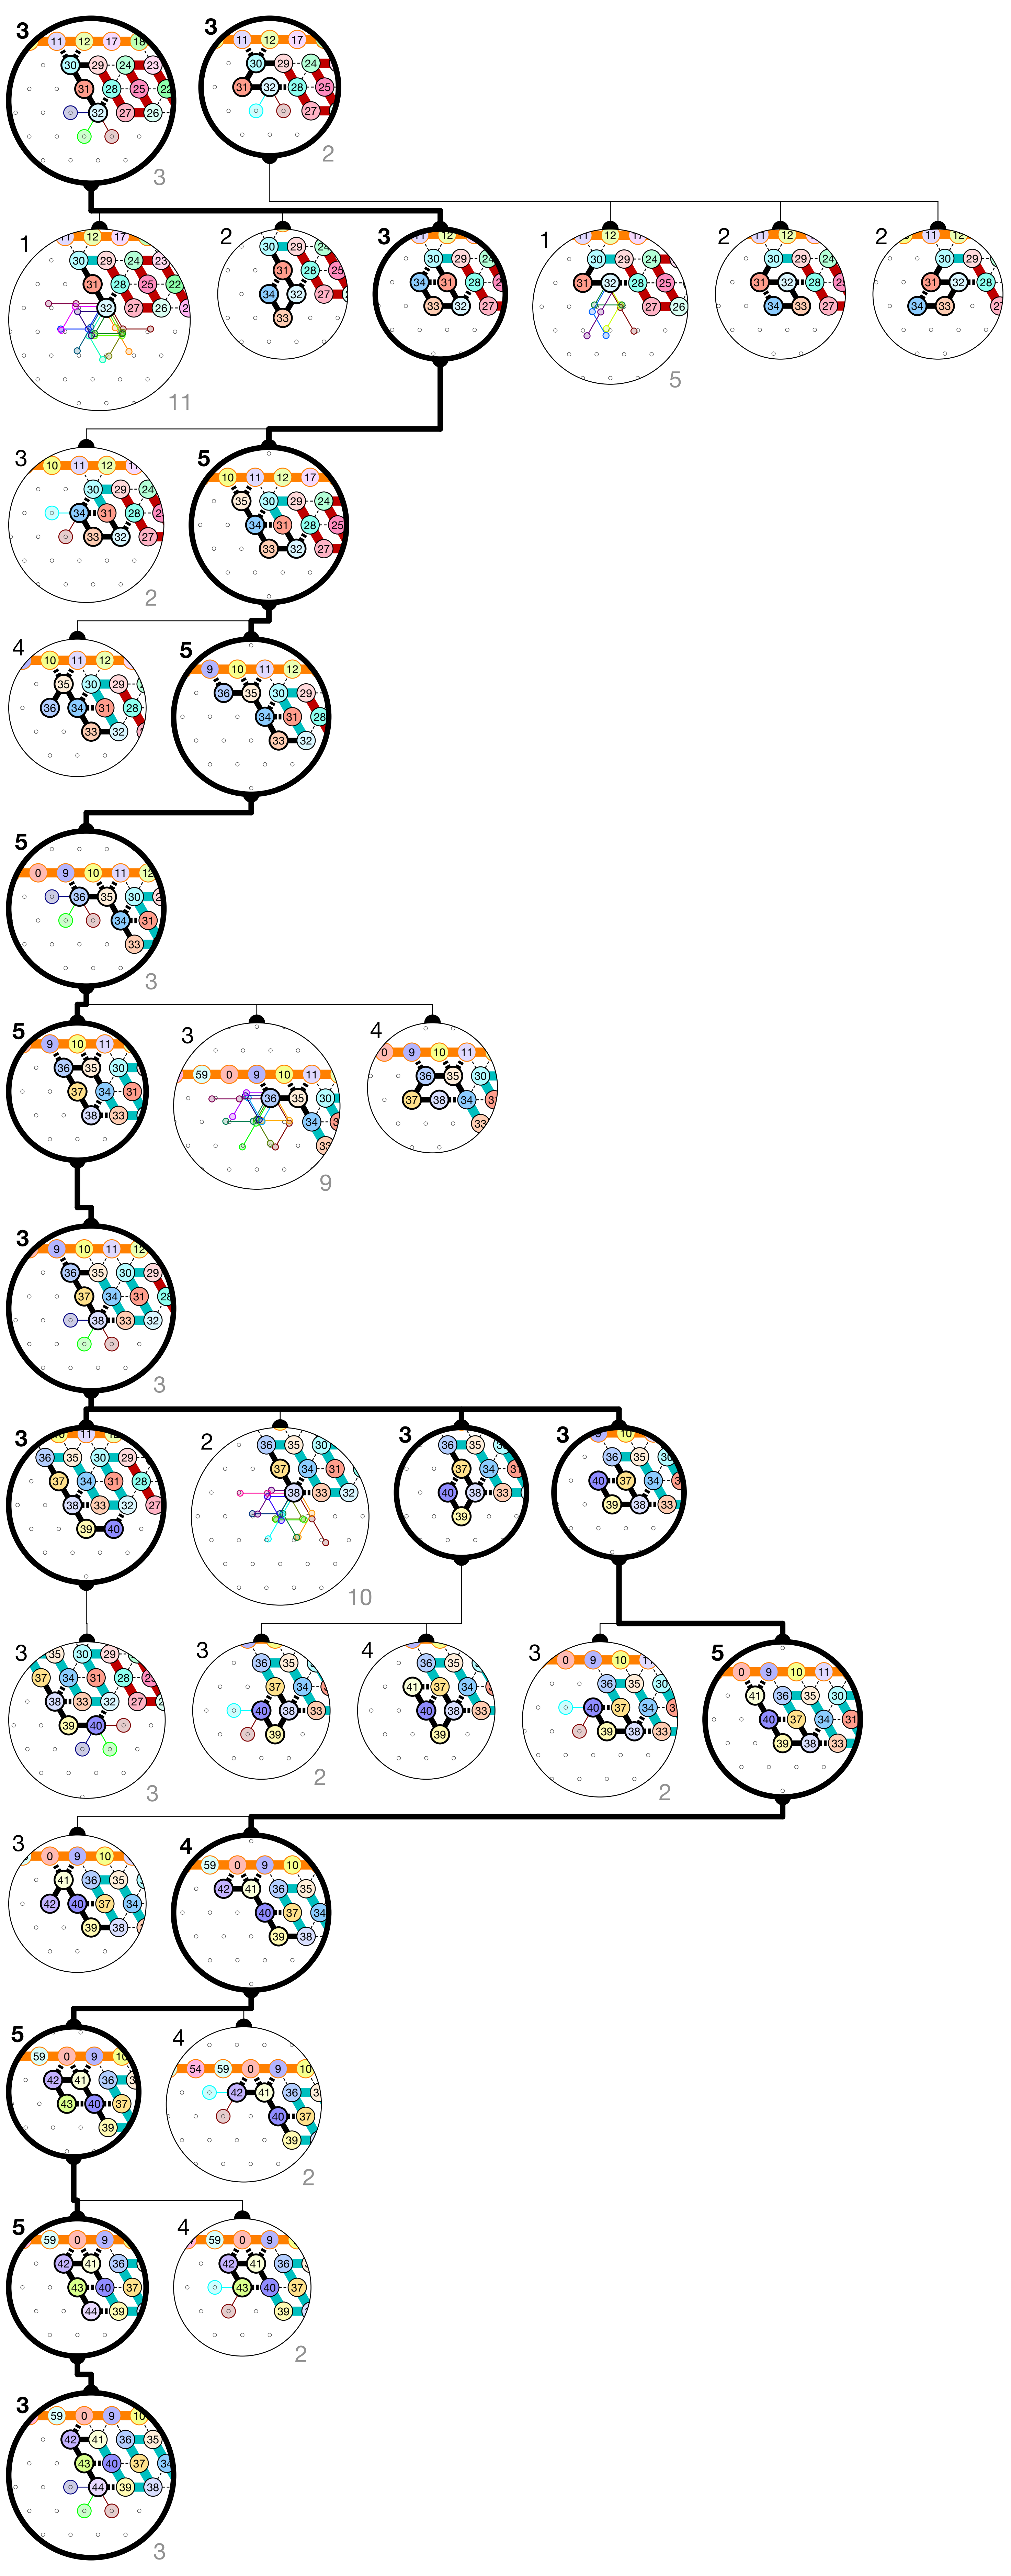

Supplement: s2 [file s2]

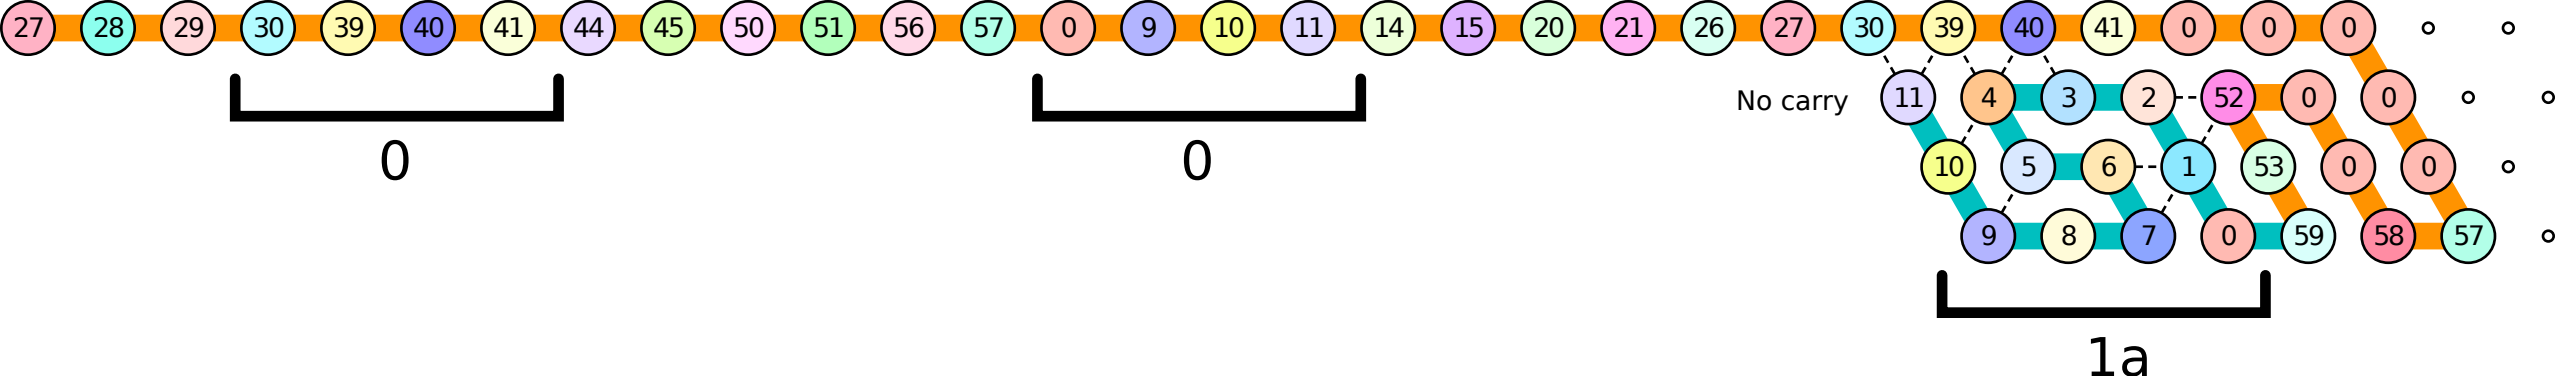

Supplement: s2 [file s2]

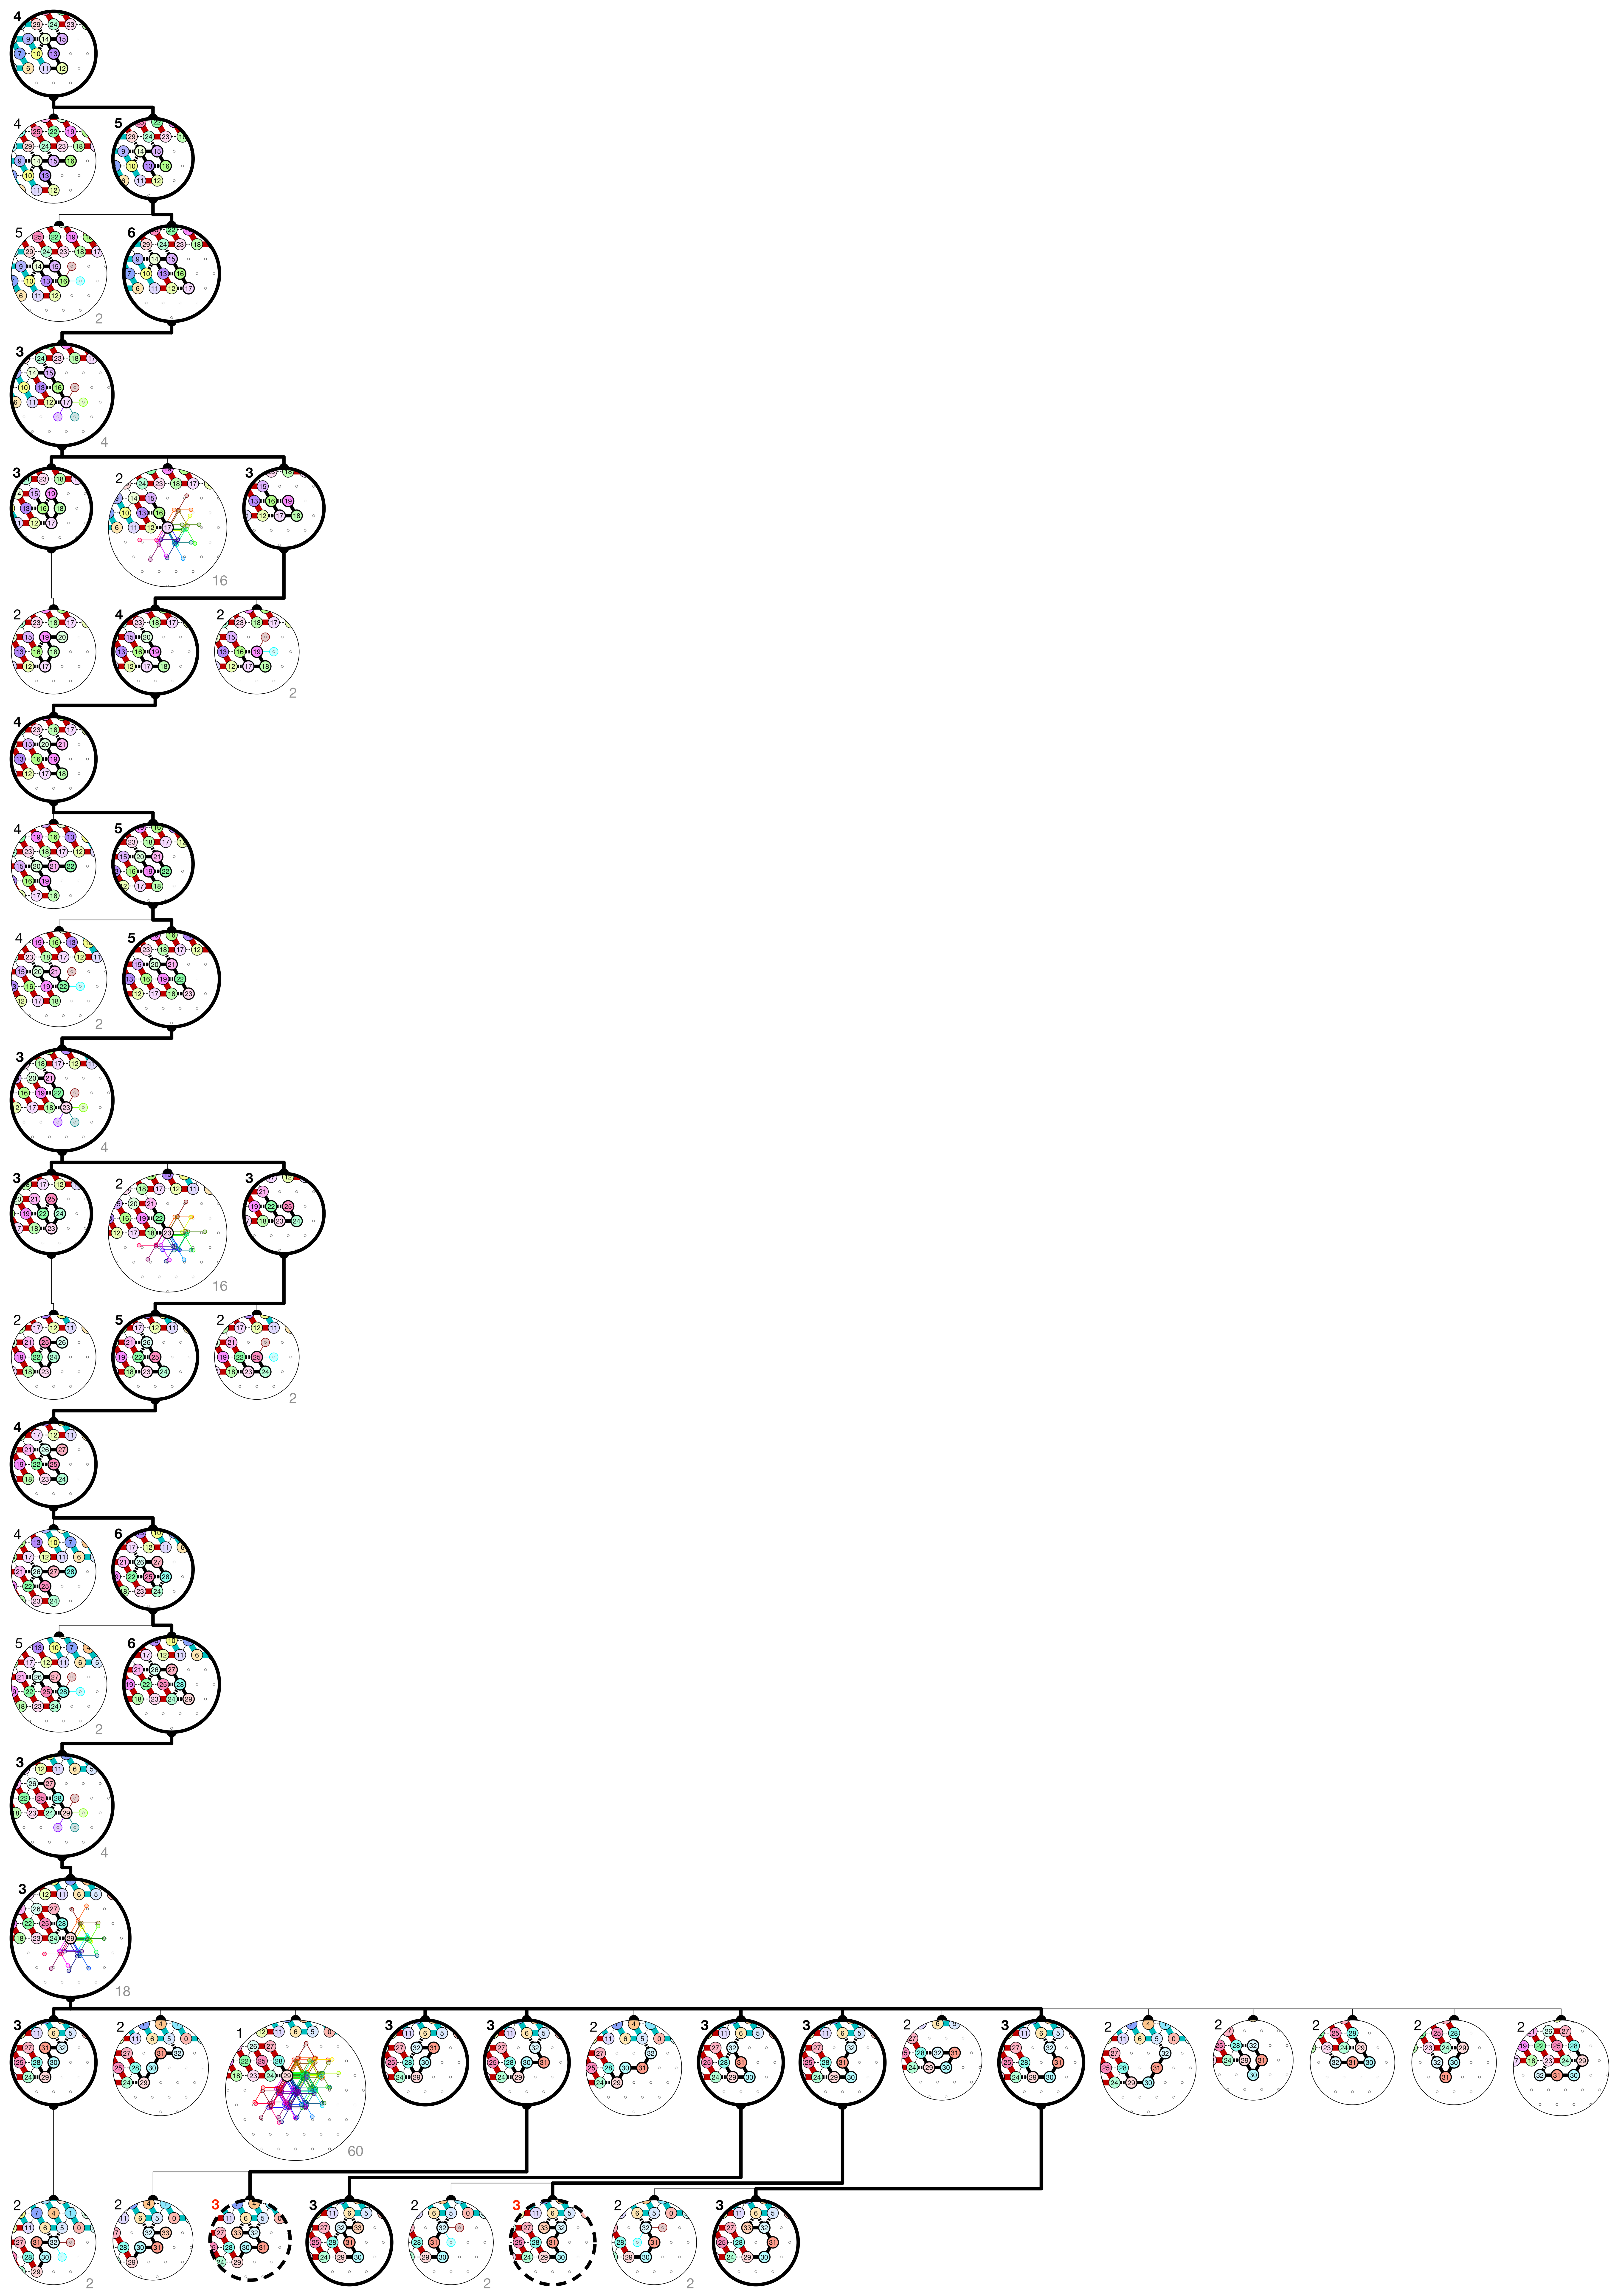

Supplement: s2 [file s2]

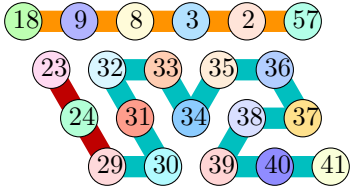

Supplement: s2 [file s2]

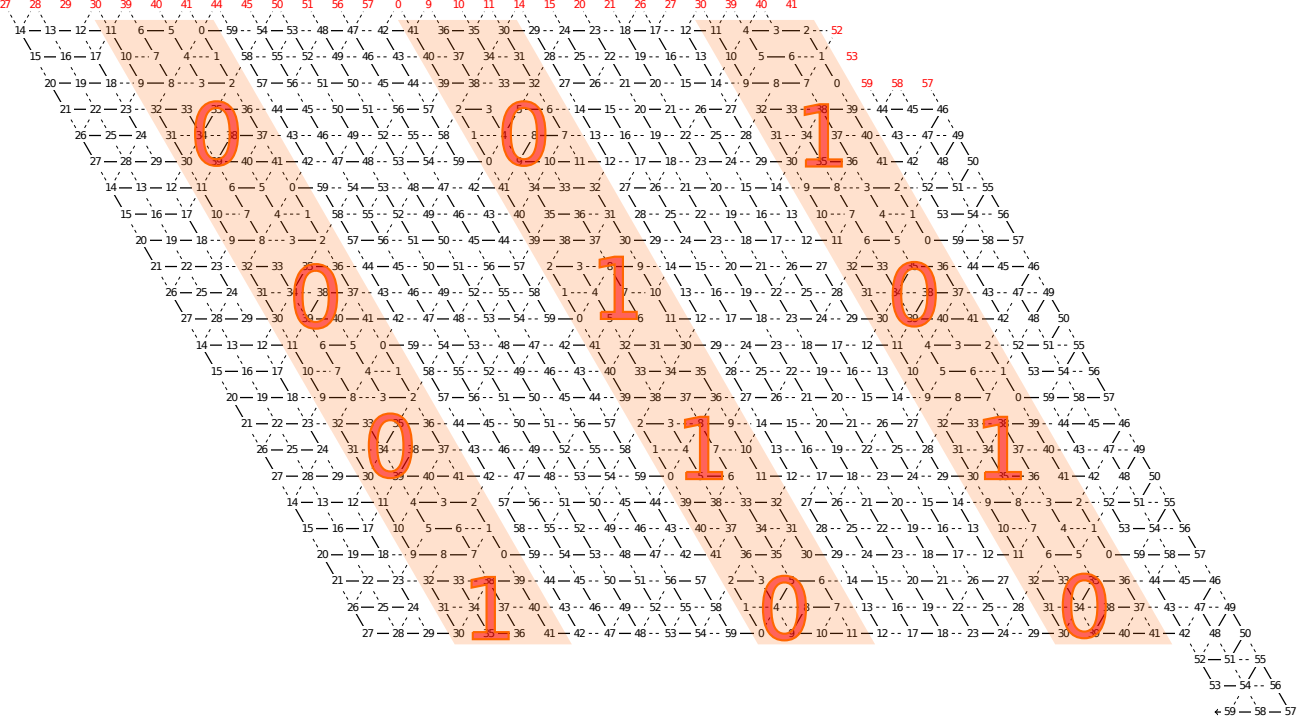

Supplement: s2 [file s2]

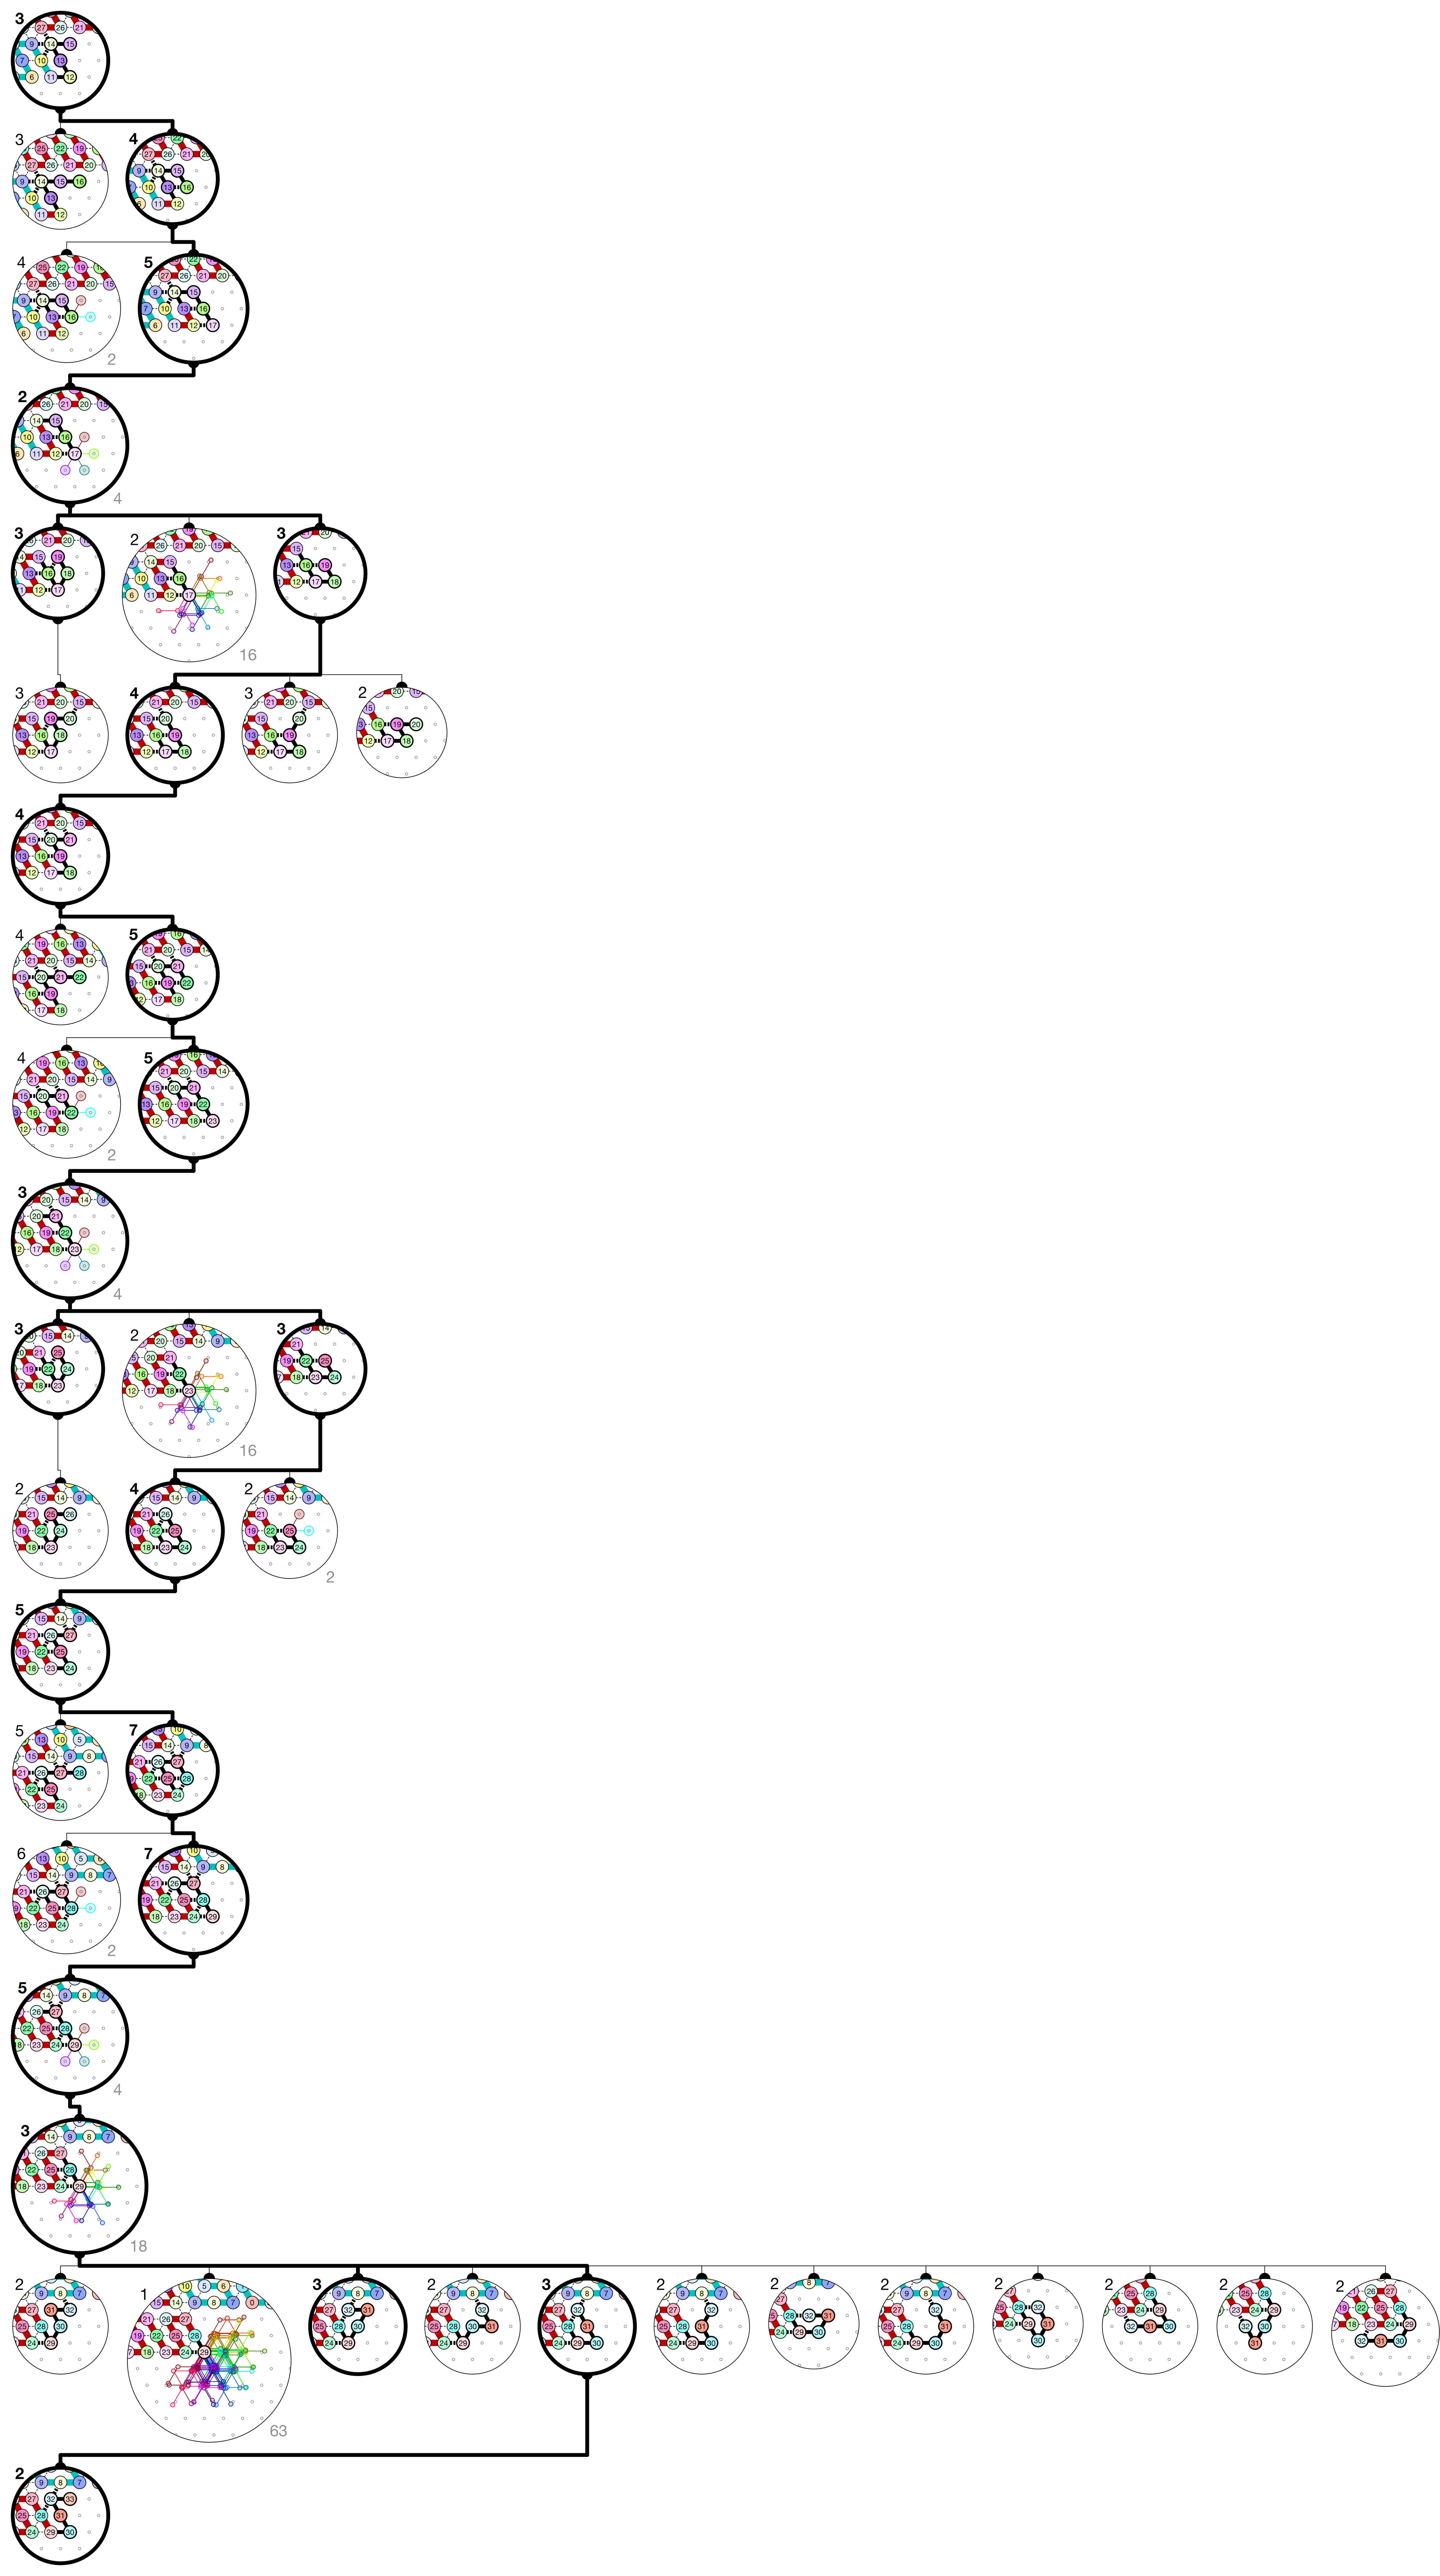

Supplement: s2 [file s2]

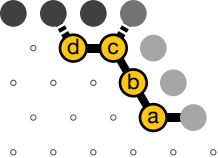

Supplement: s2 [file s2]

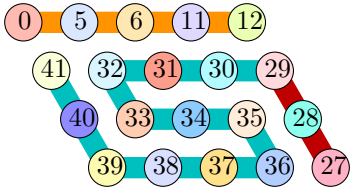

Supplement: s2 [file s2]

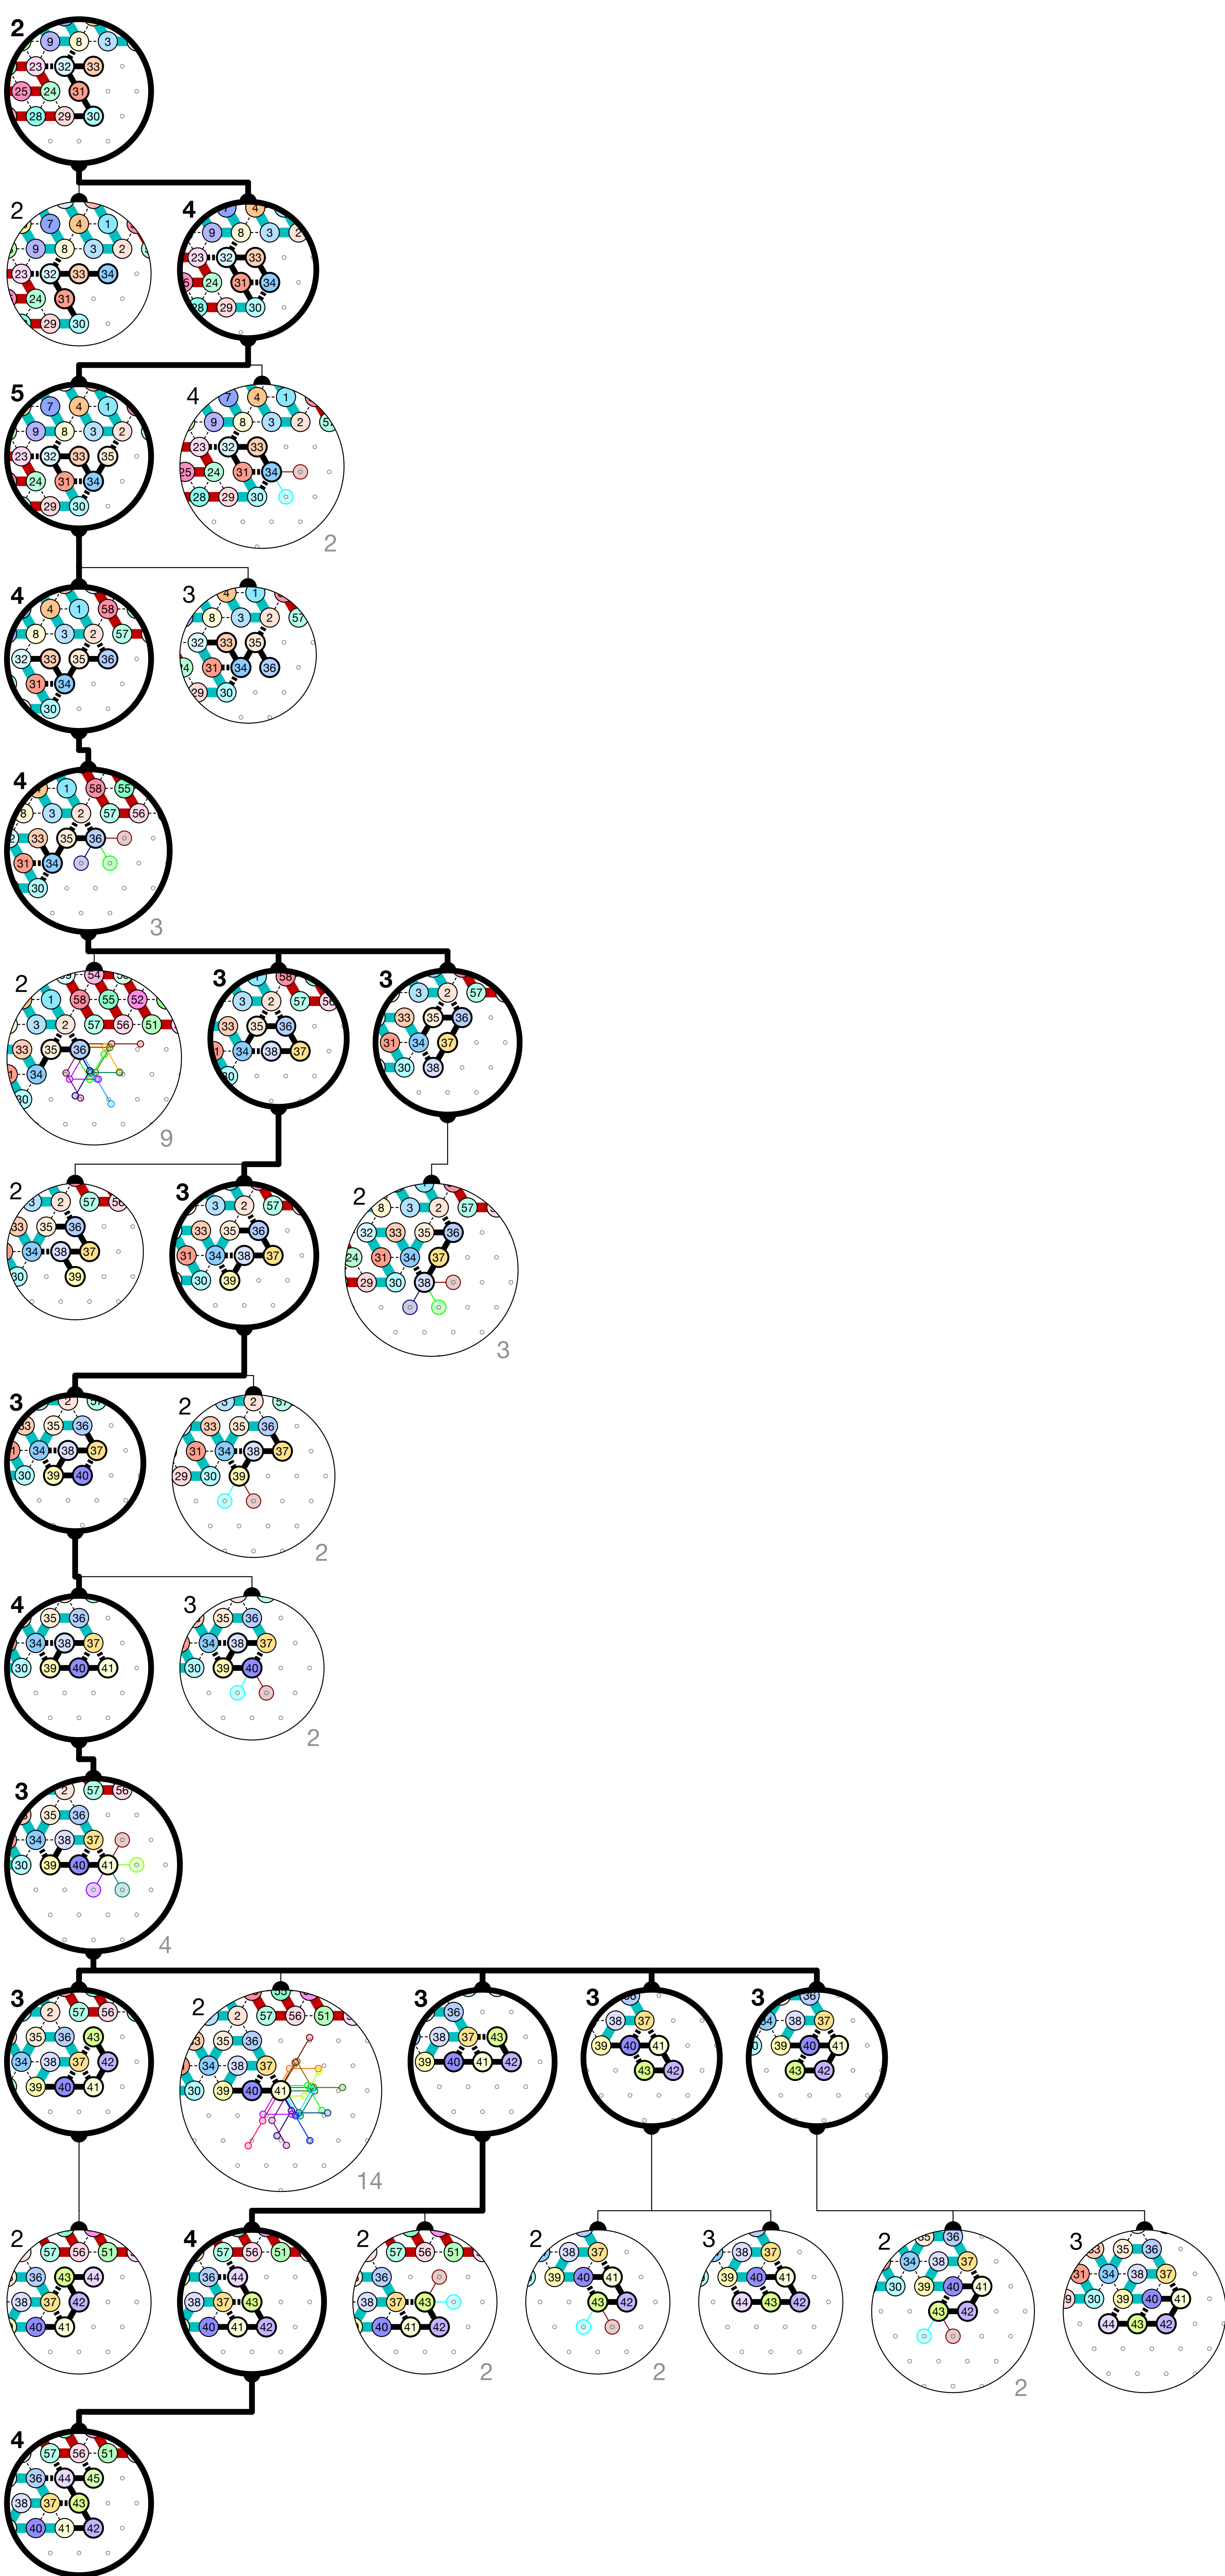

Supplement: s2 [file s2]

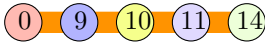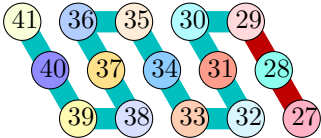

Supplement: s2 [file s2]

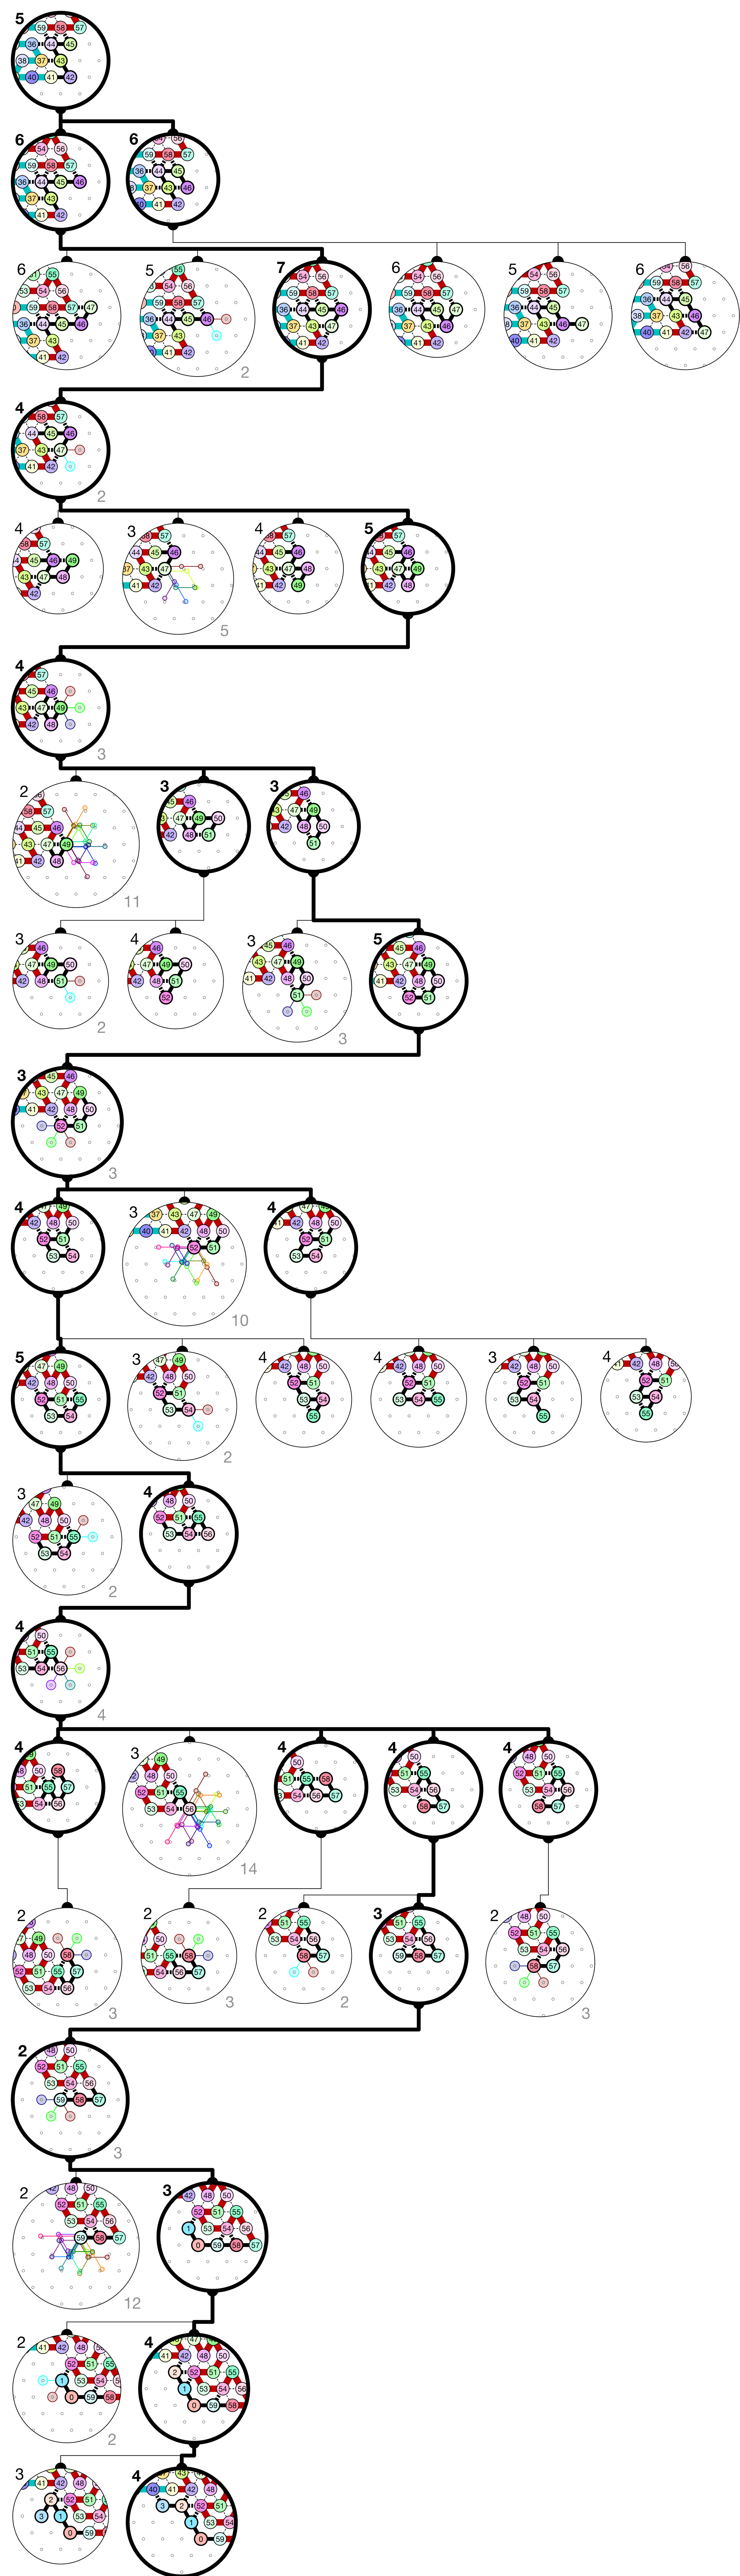

Supplement: s2 [file s2]

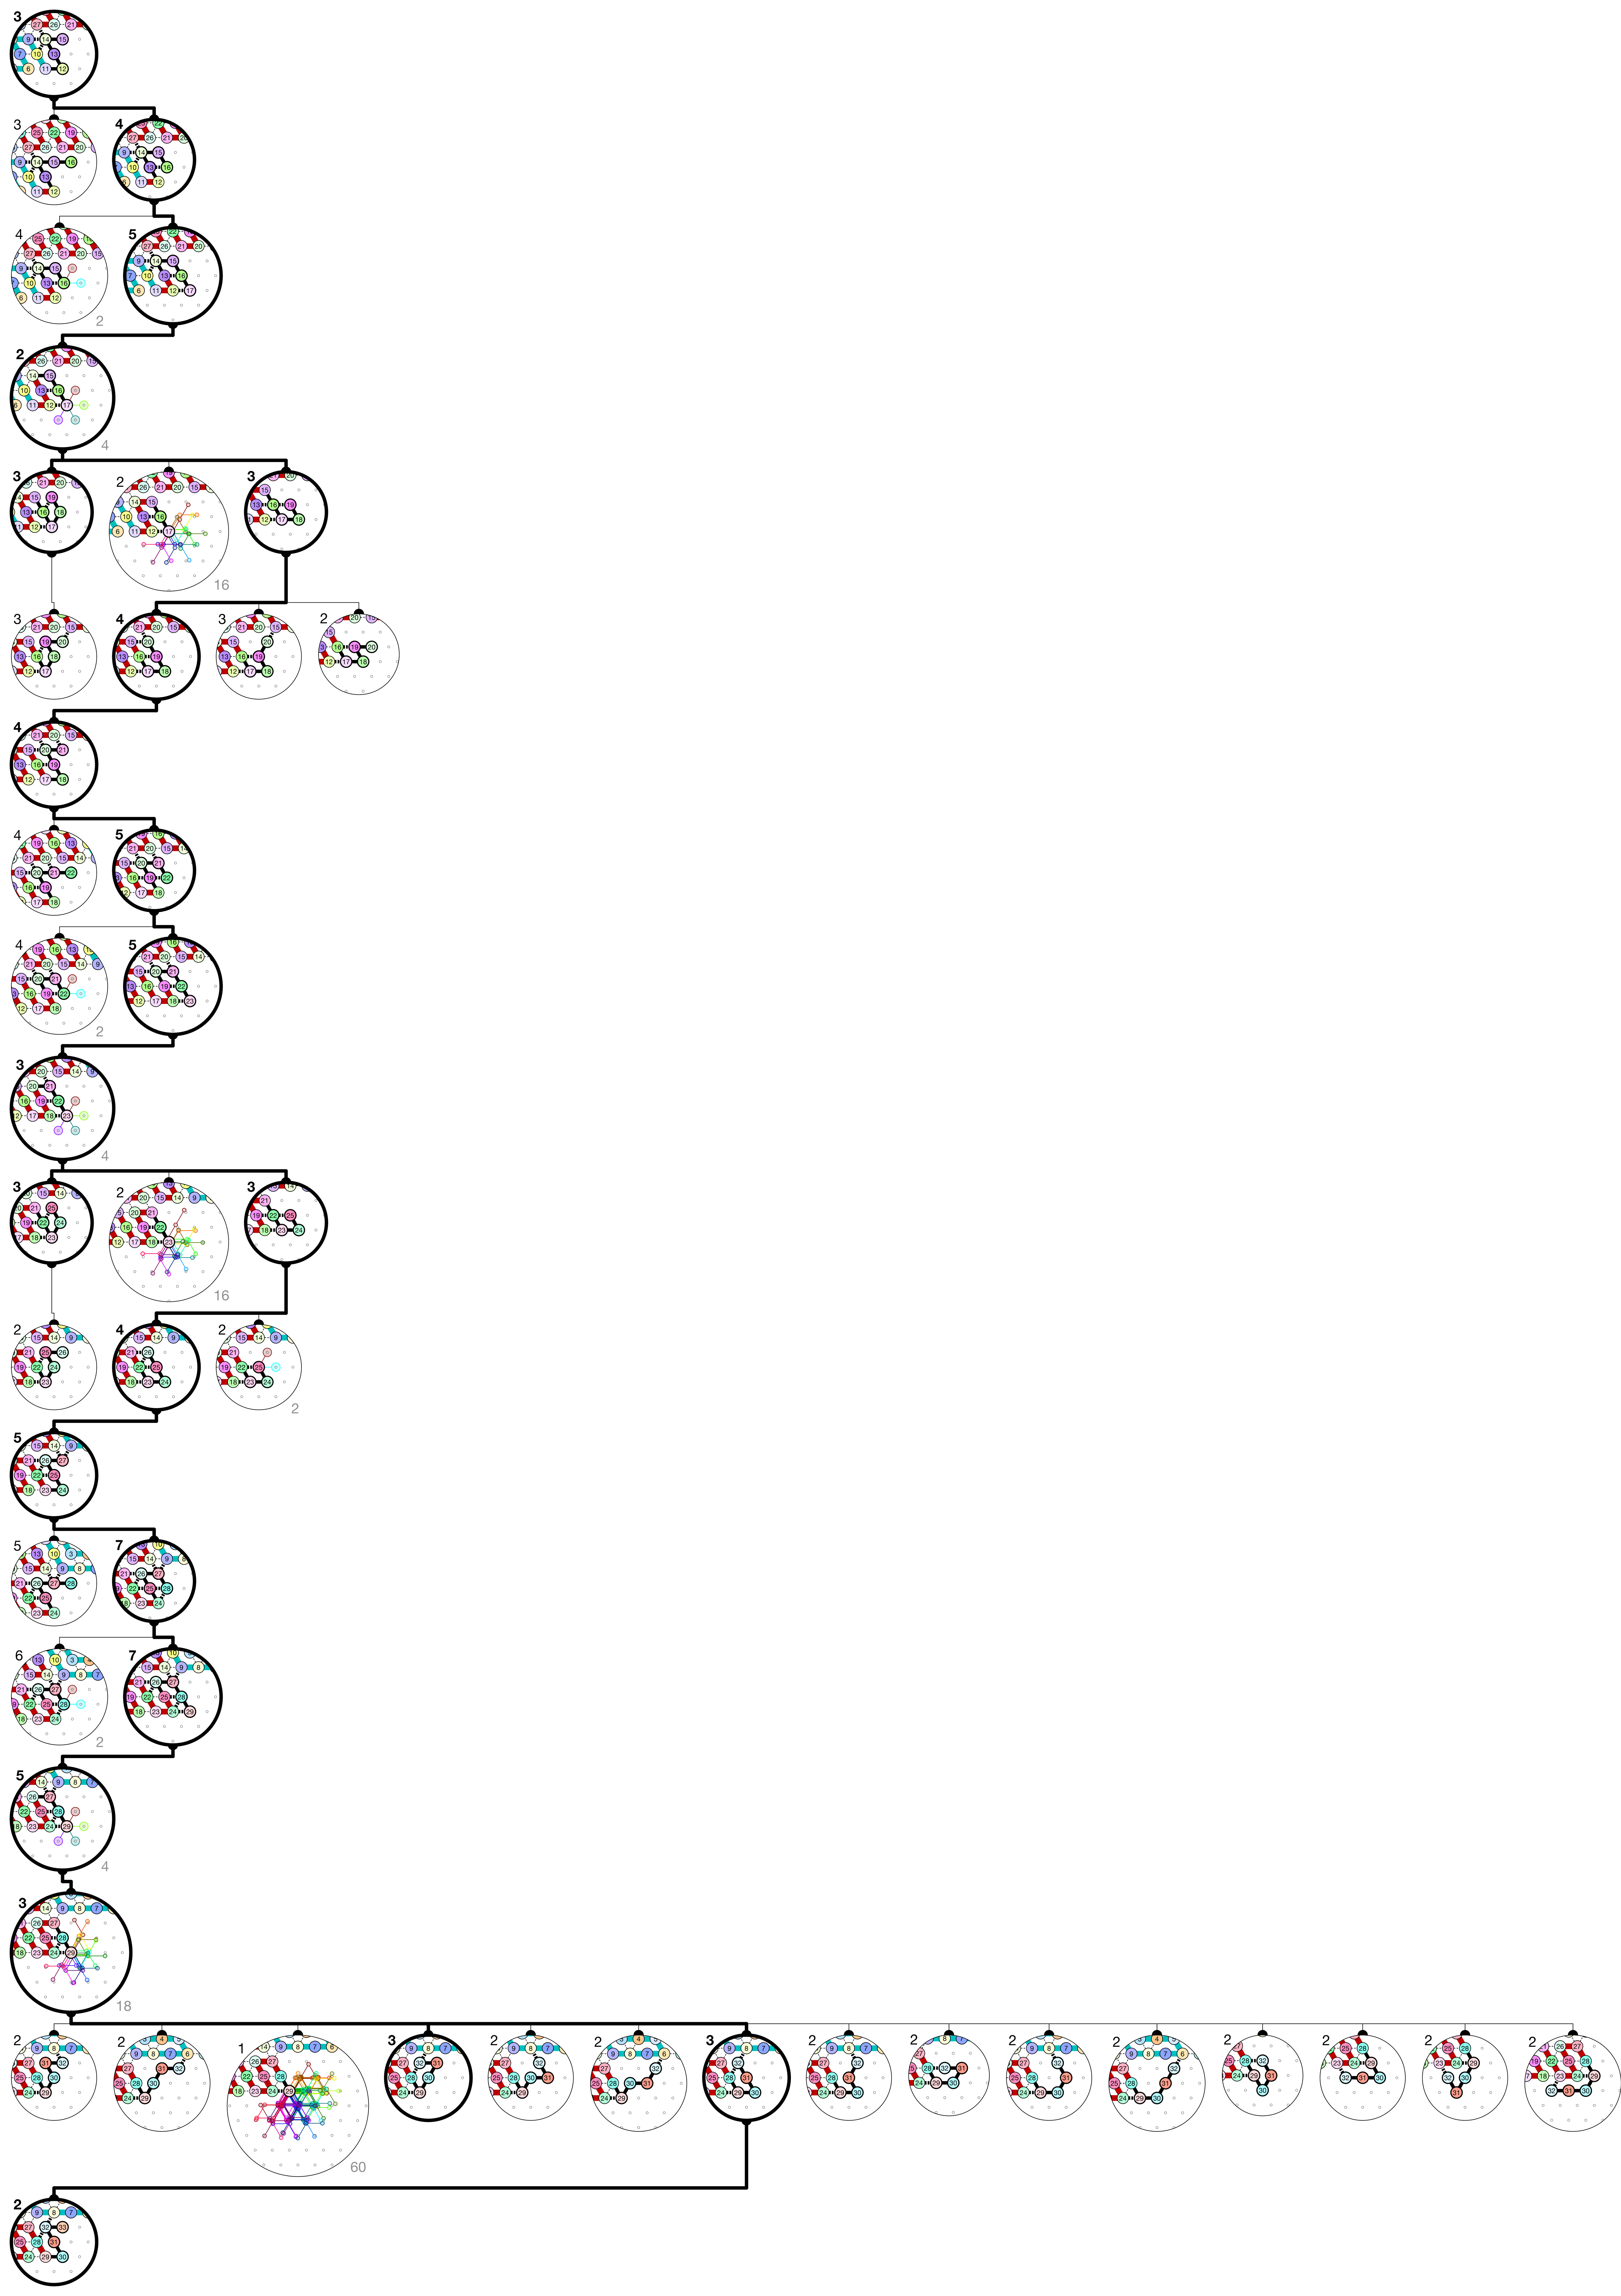

Supplement: s2 [file s2]

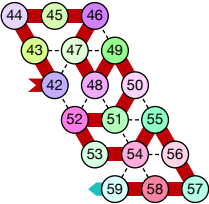

Supplement: s2 [file s2]

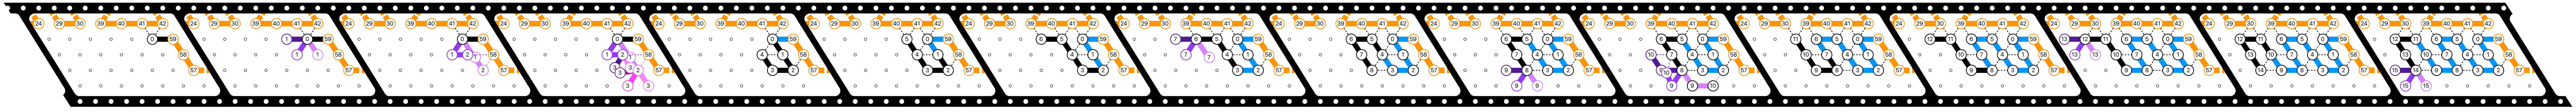

Supplement: s2 [file s2]

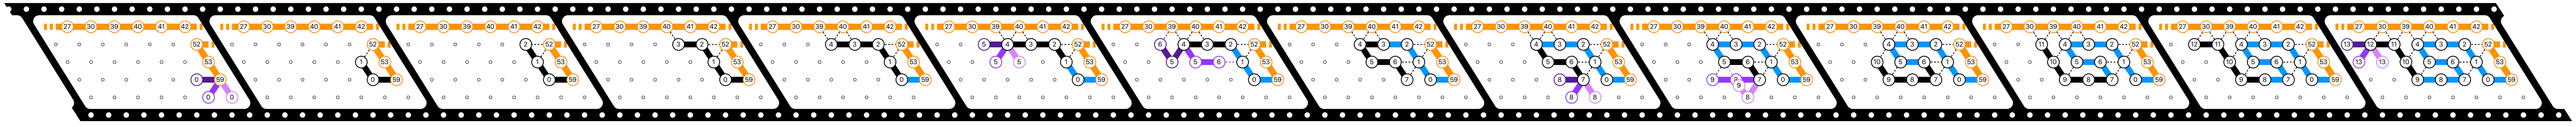

Supplement: s2 [file s2]

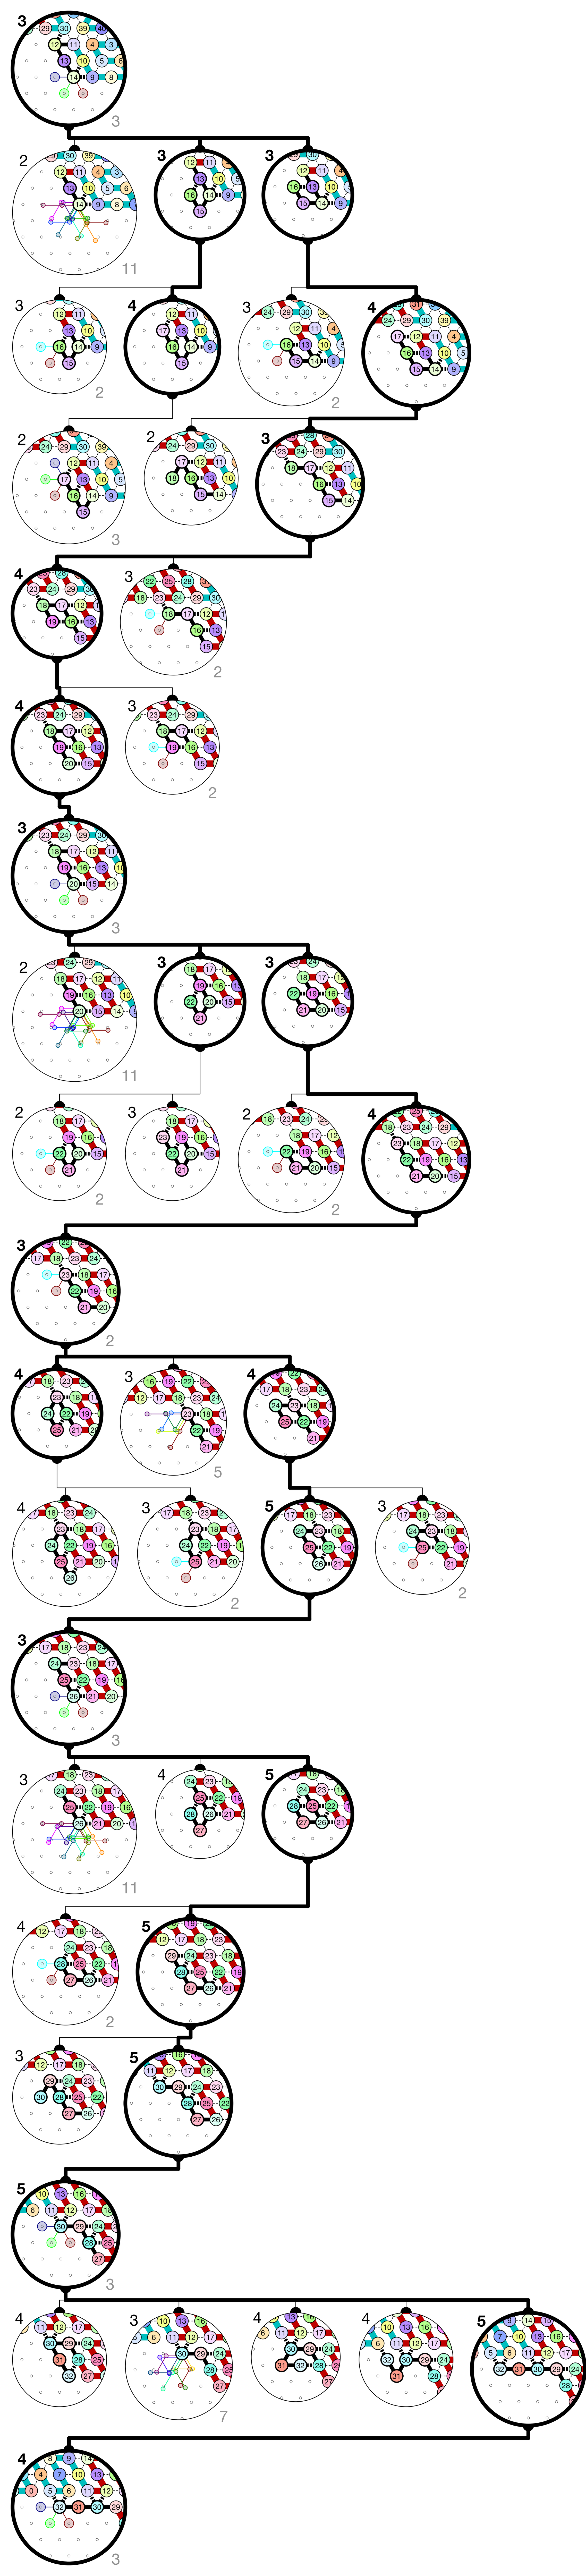

Supplement: s2 [file s2]

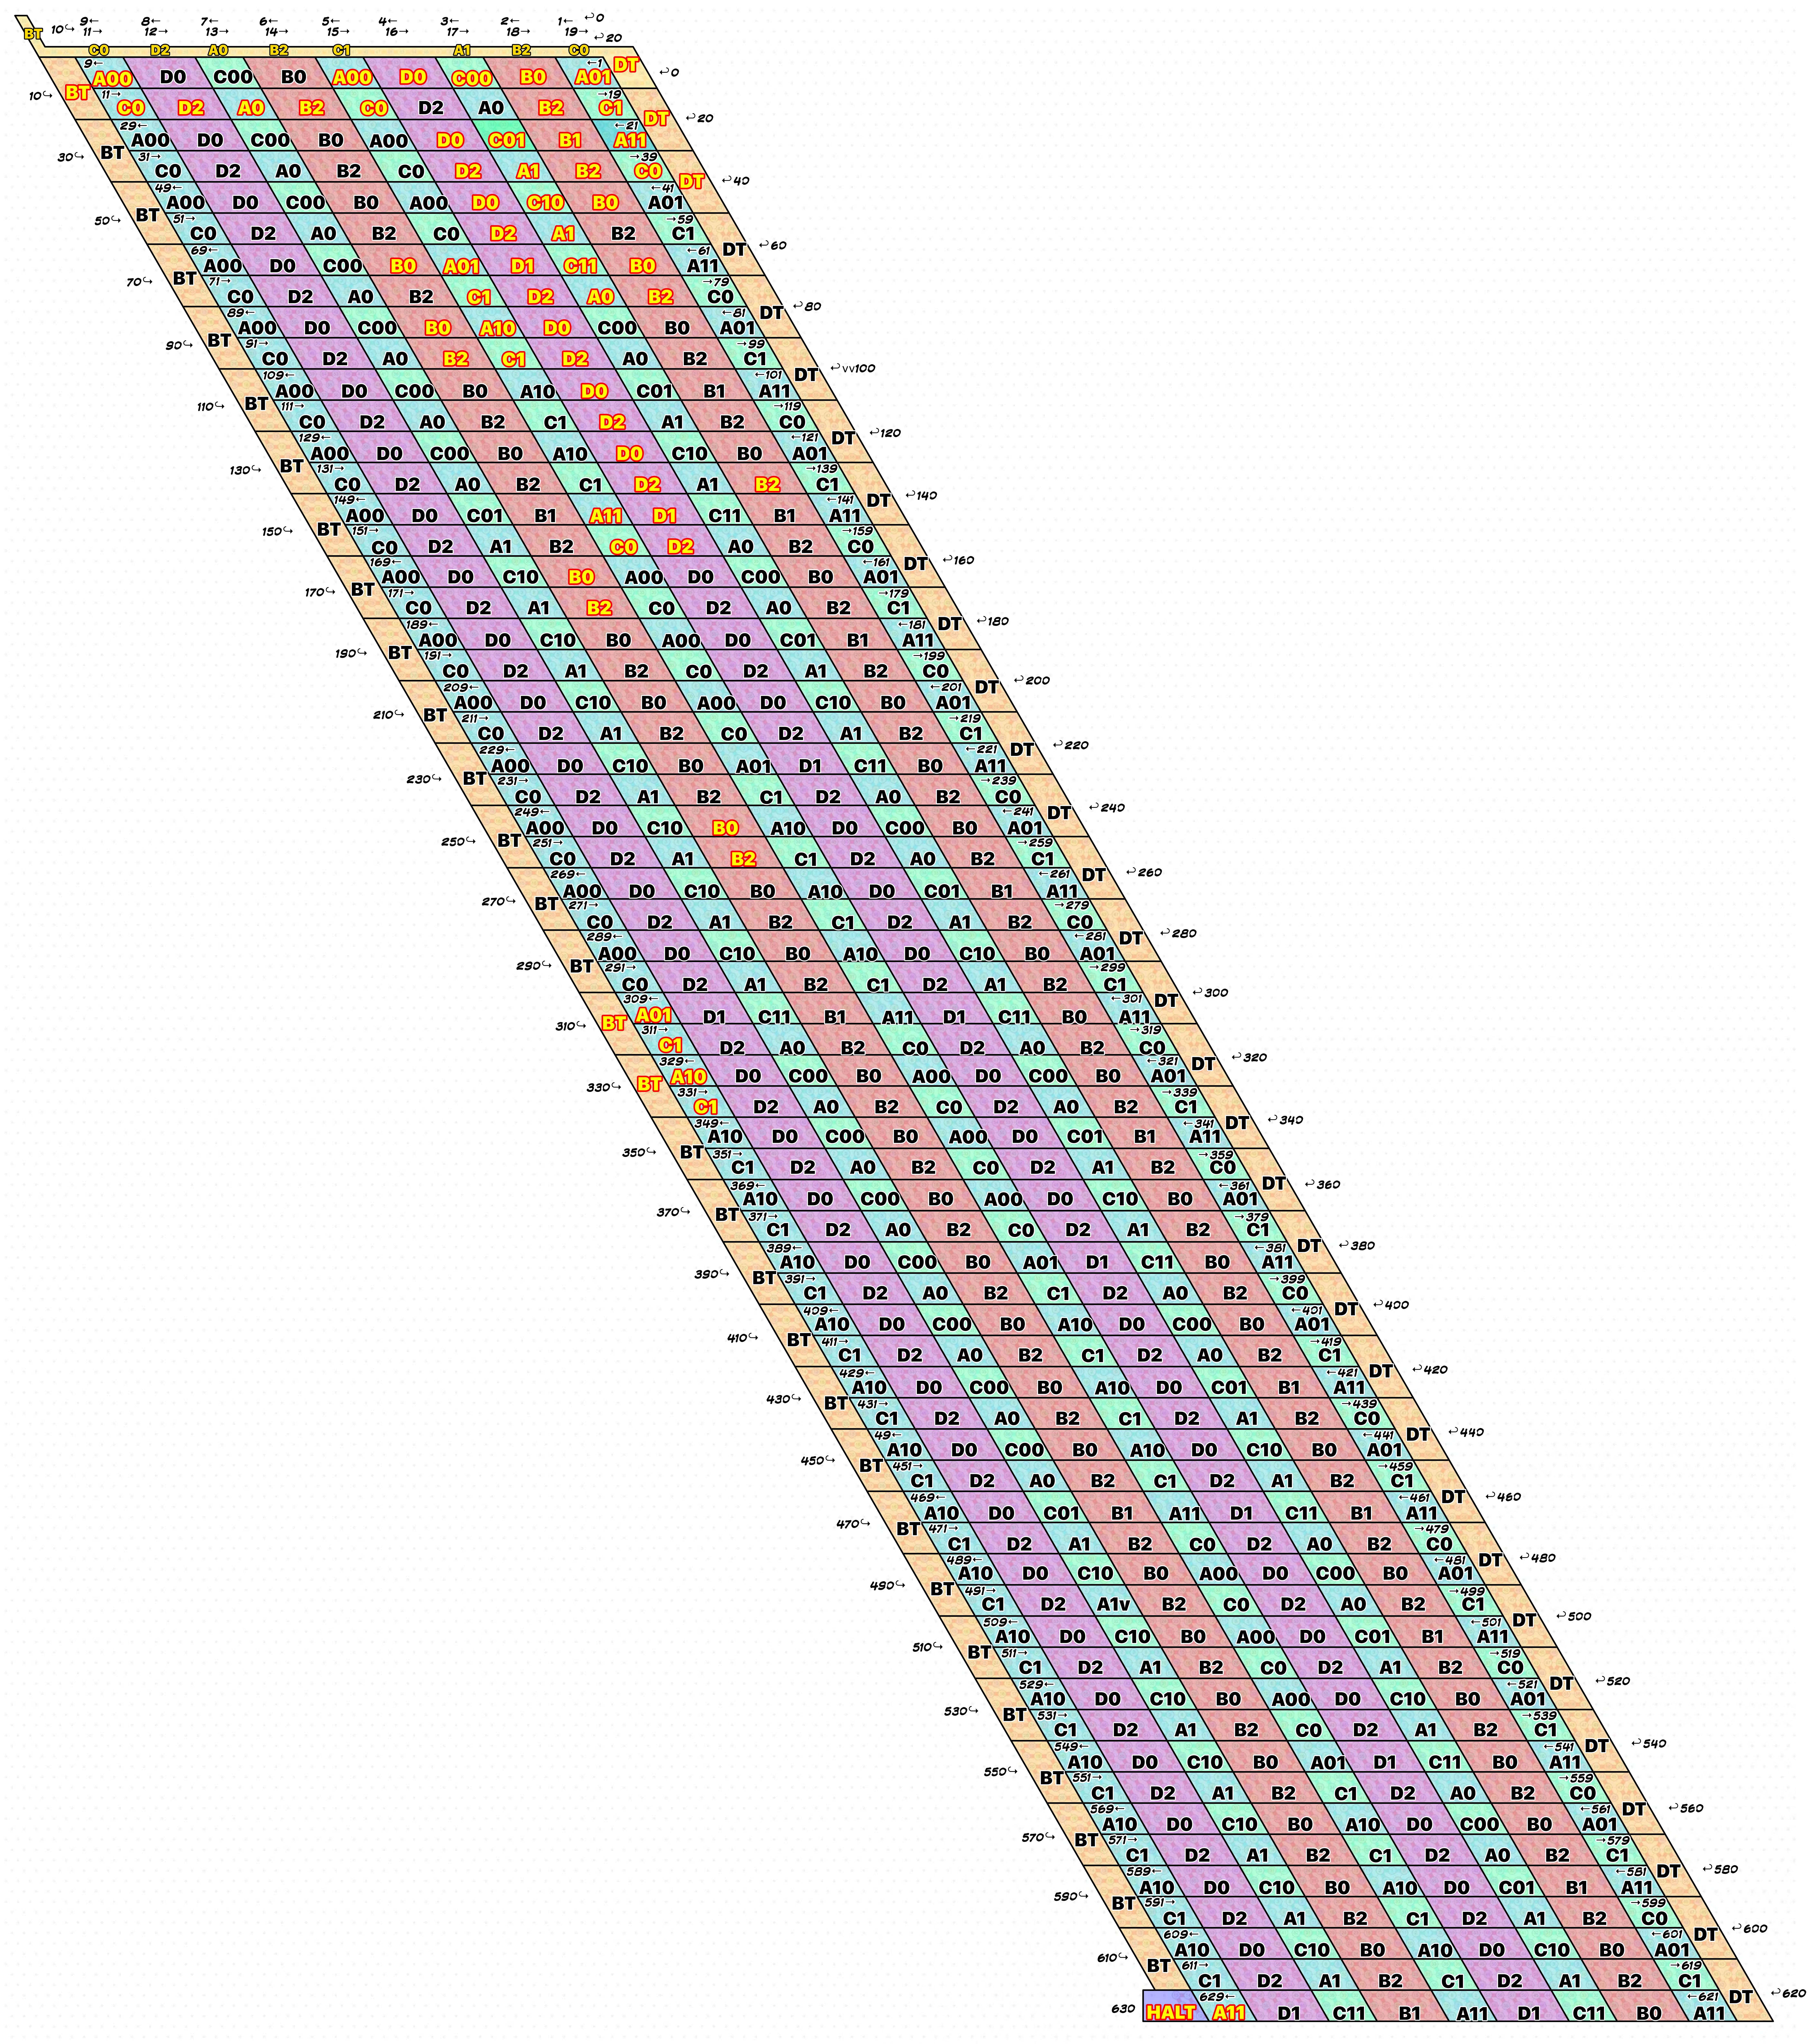

Supplement: s2 [file s2]

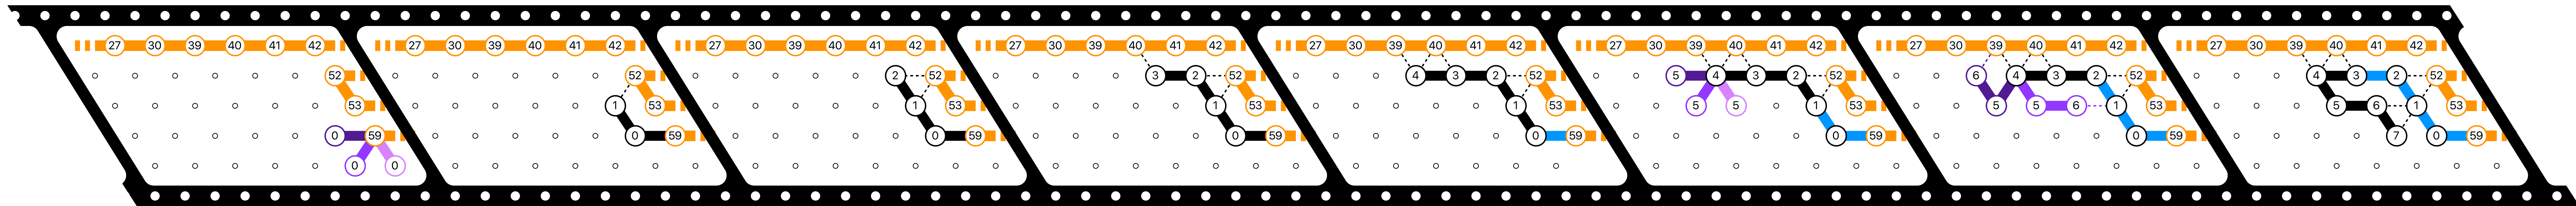

Supplement: s2 [file s2]

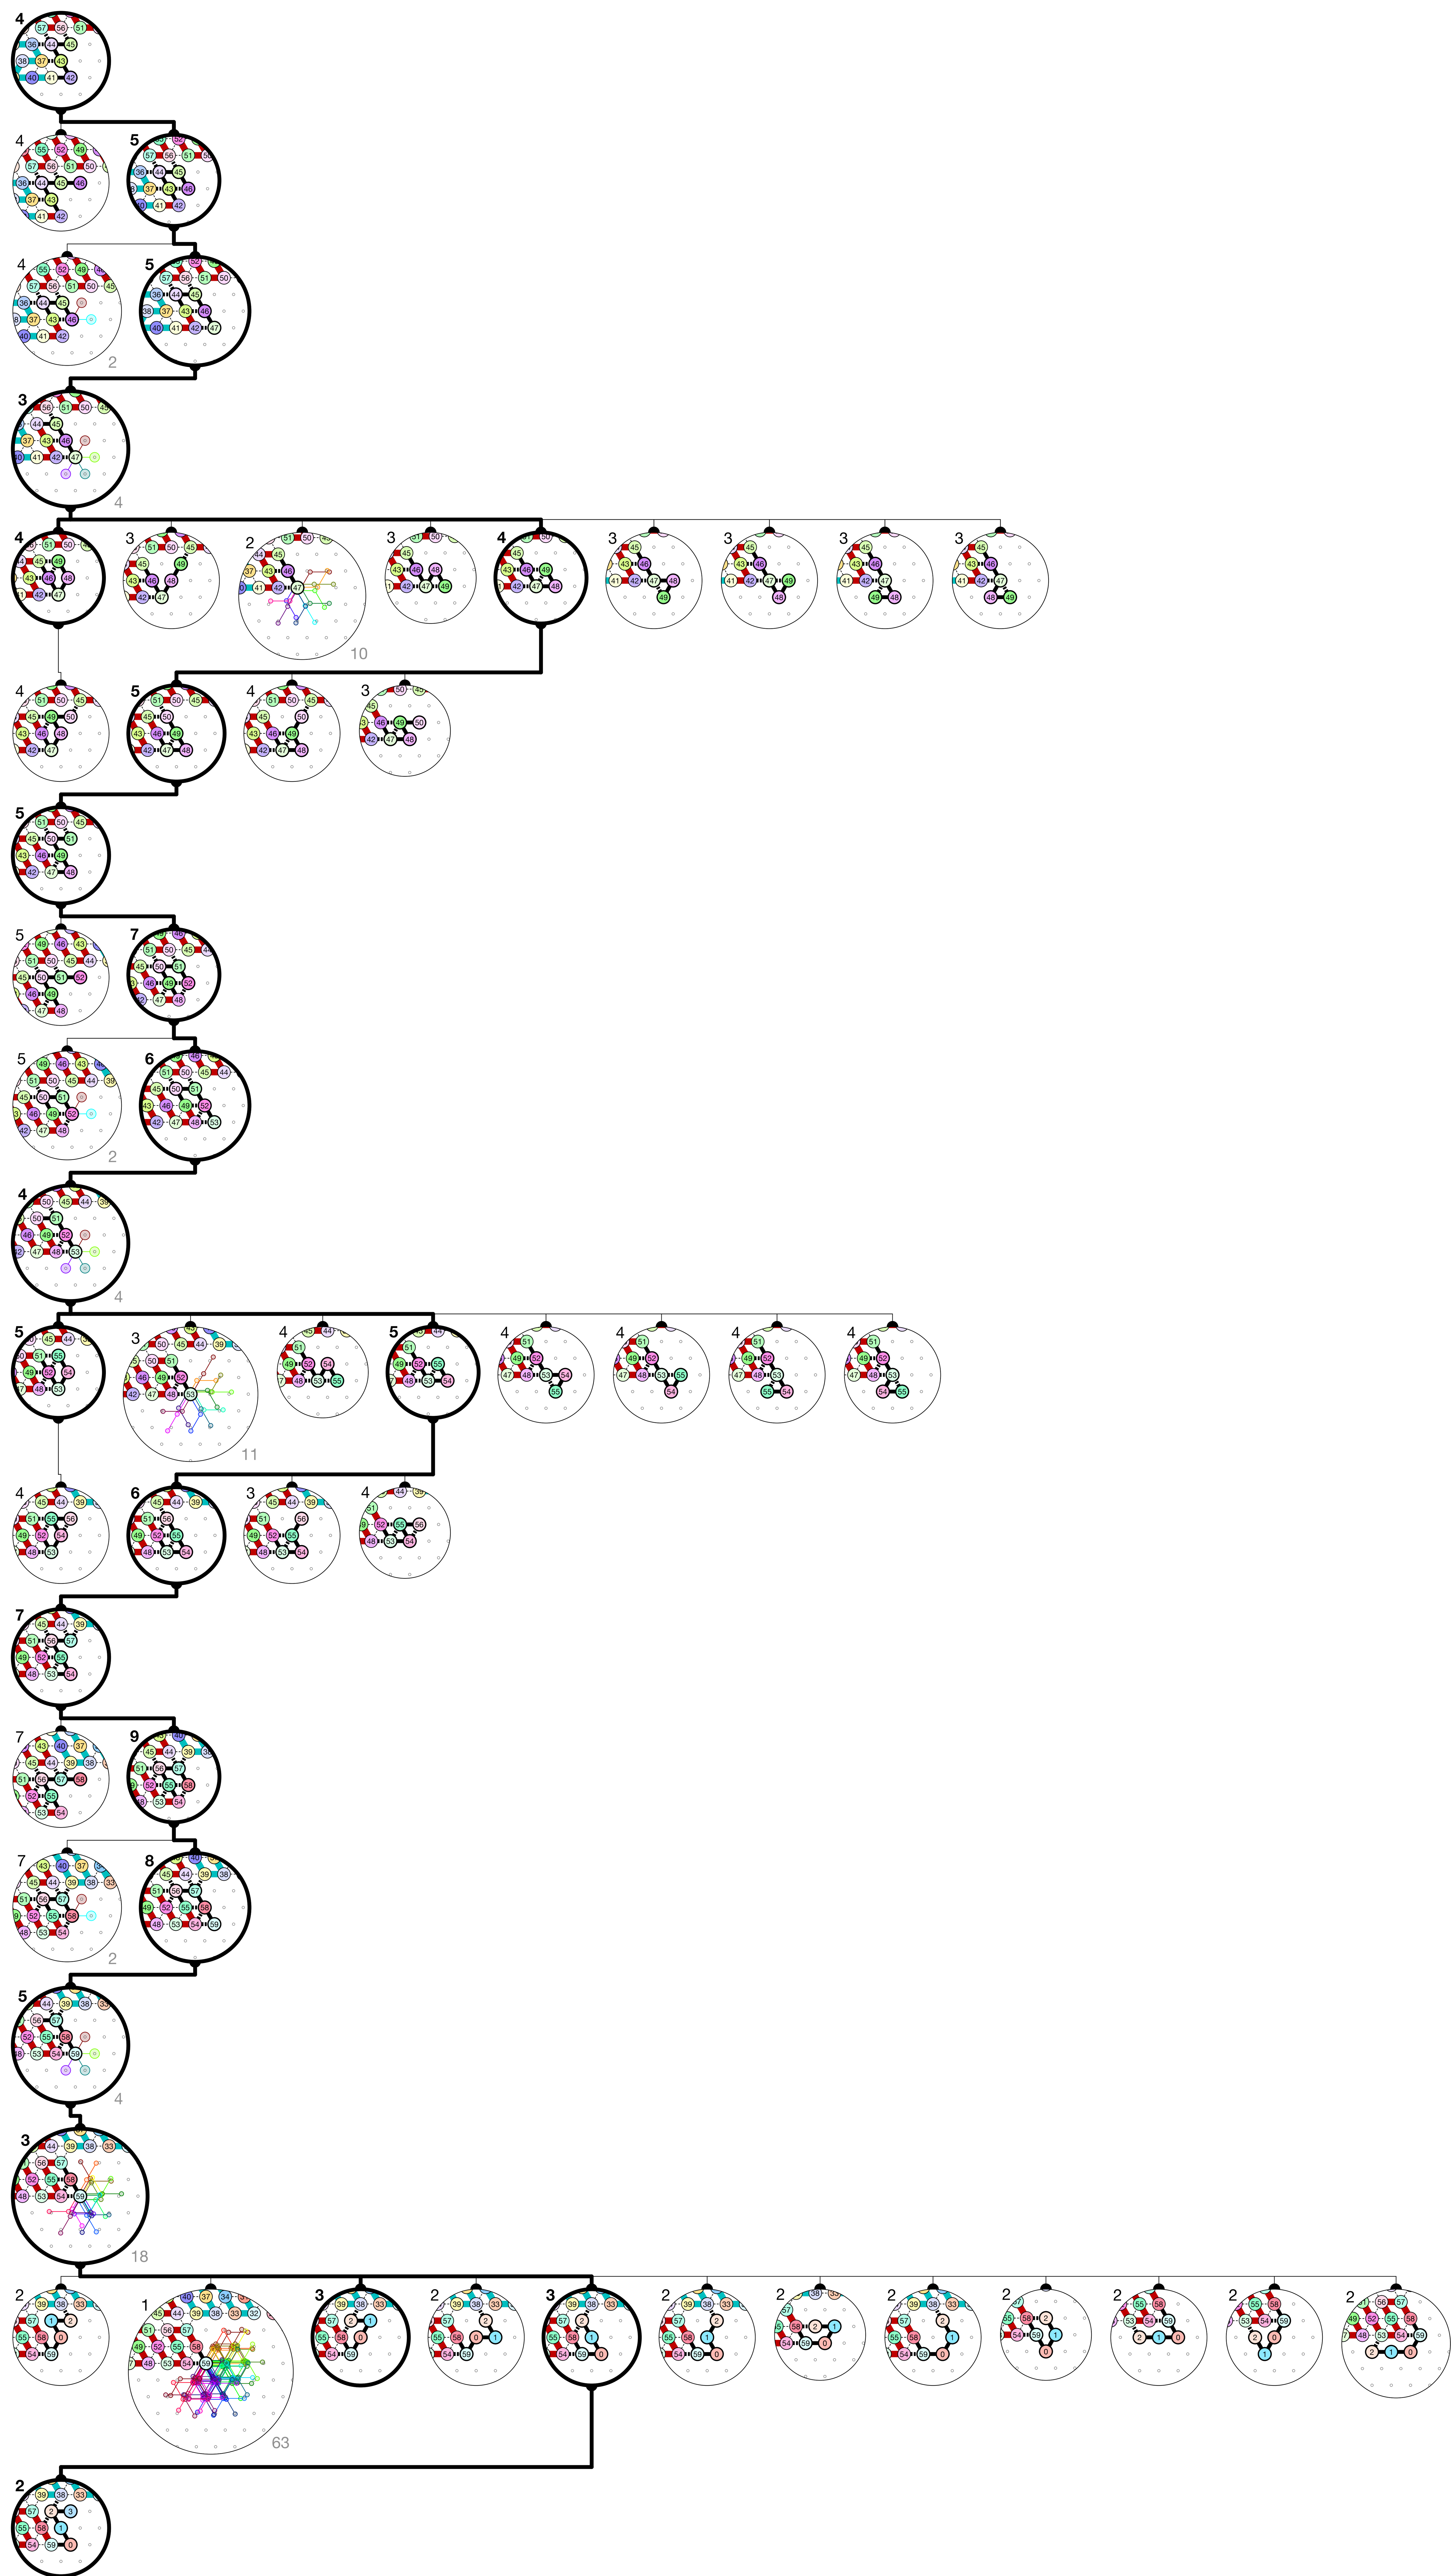

Supplement: s2 [file s2]

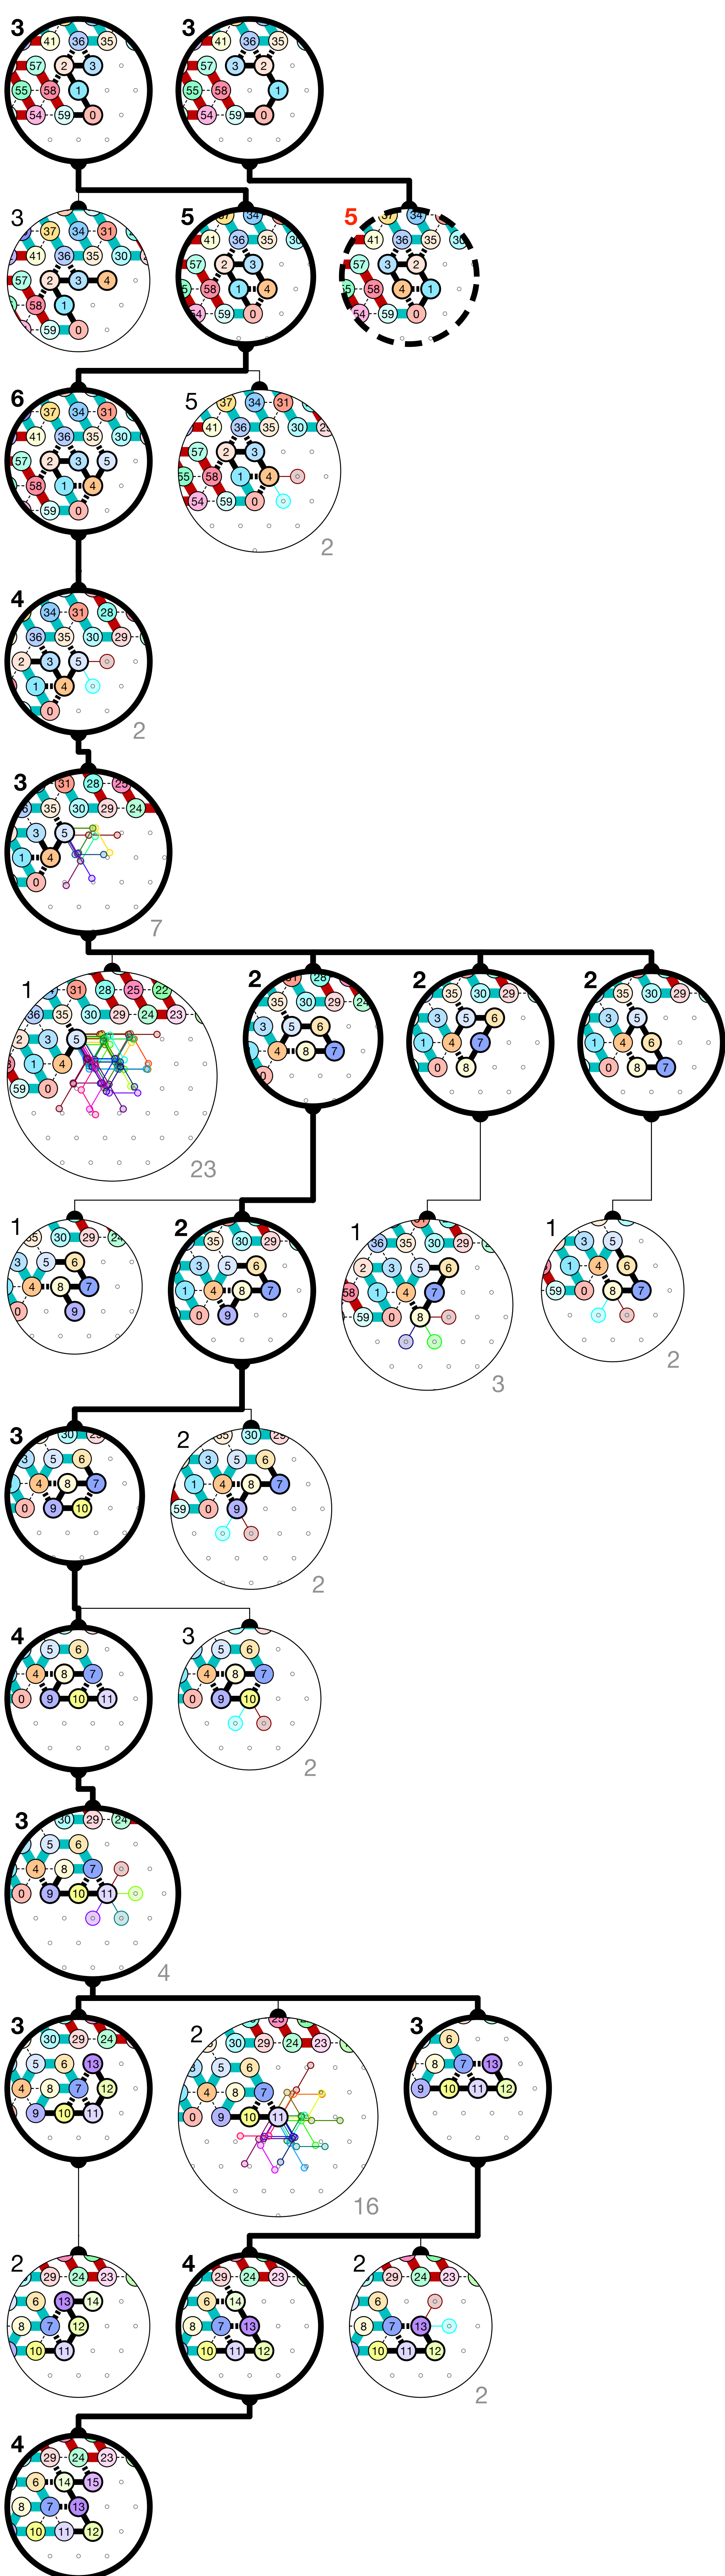

Supplement: s2 [file s2]

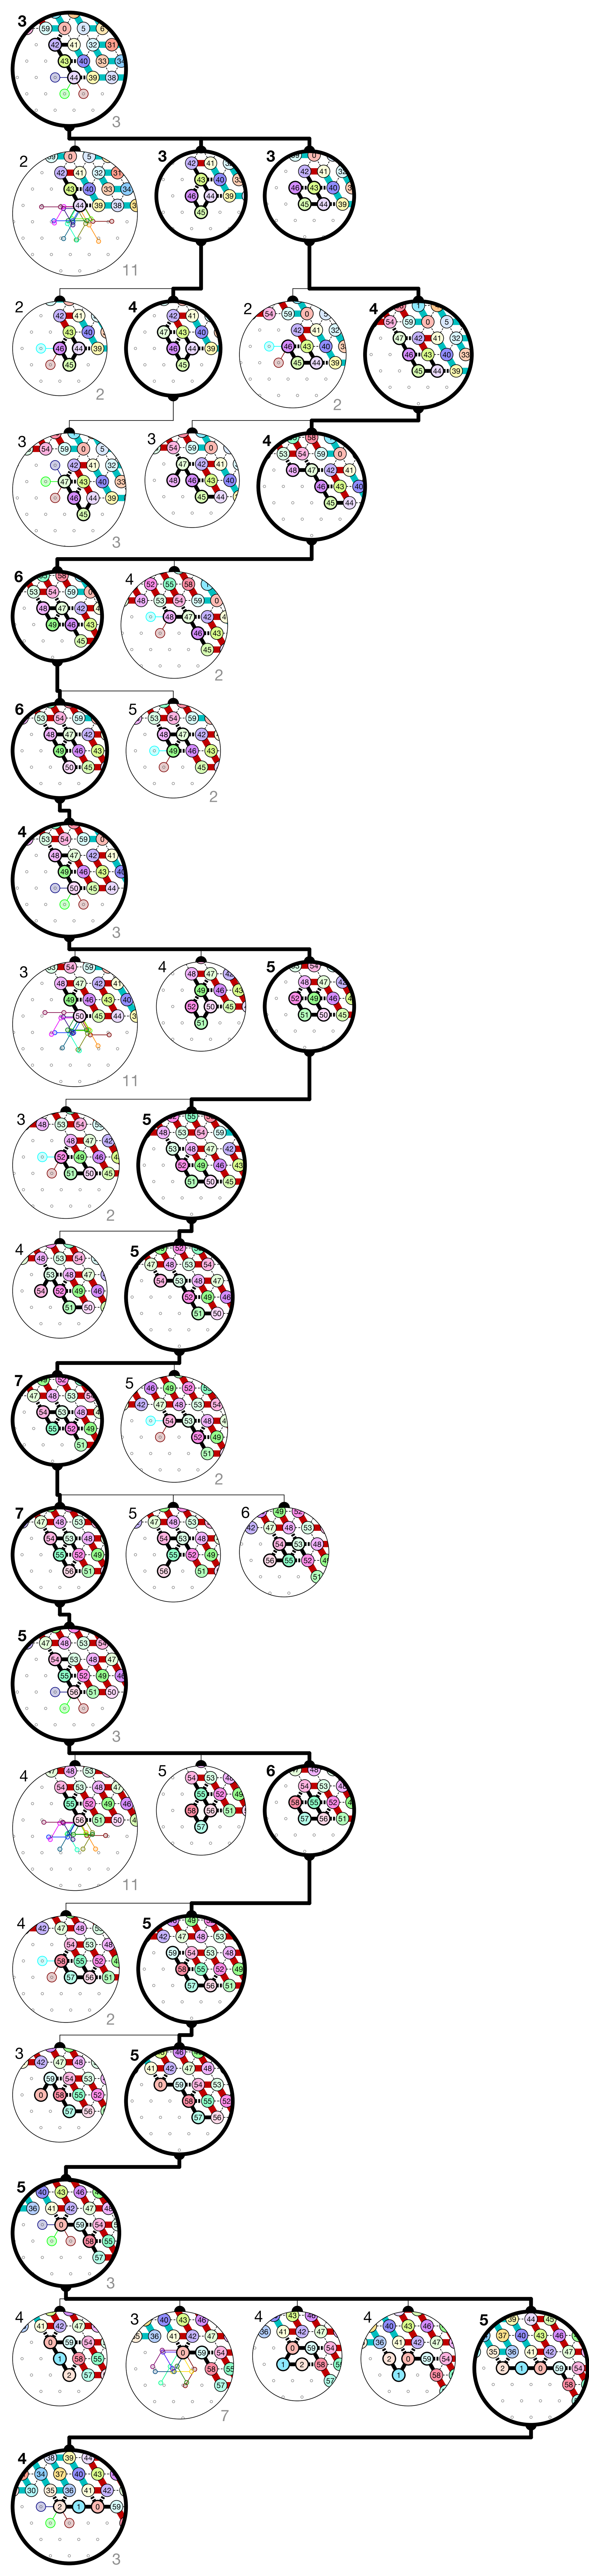

Supplement: s2 [file s2]

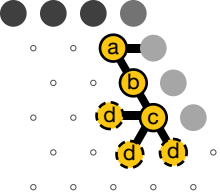

Supplement: s2 [file s2]

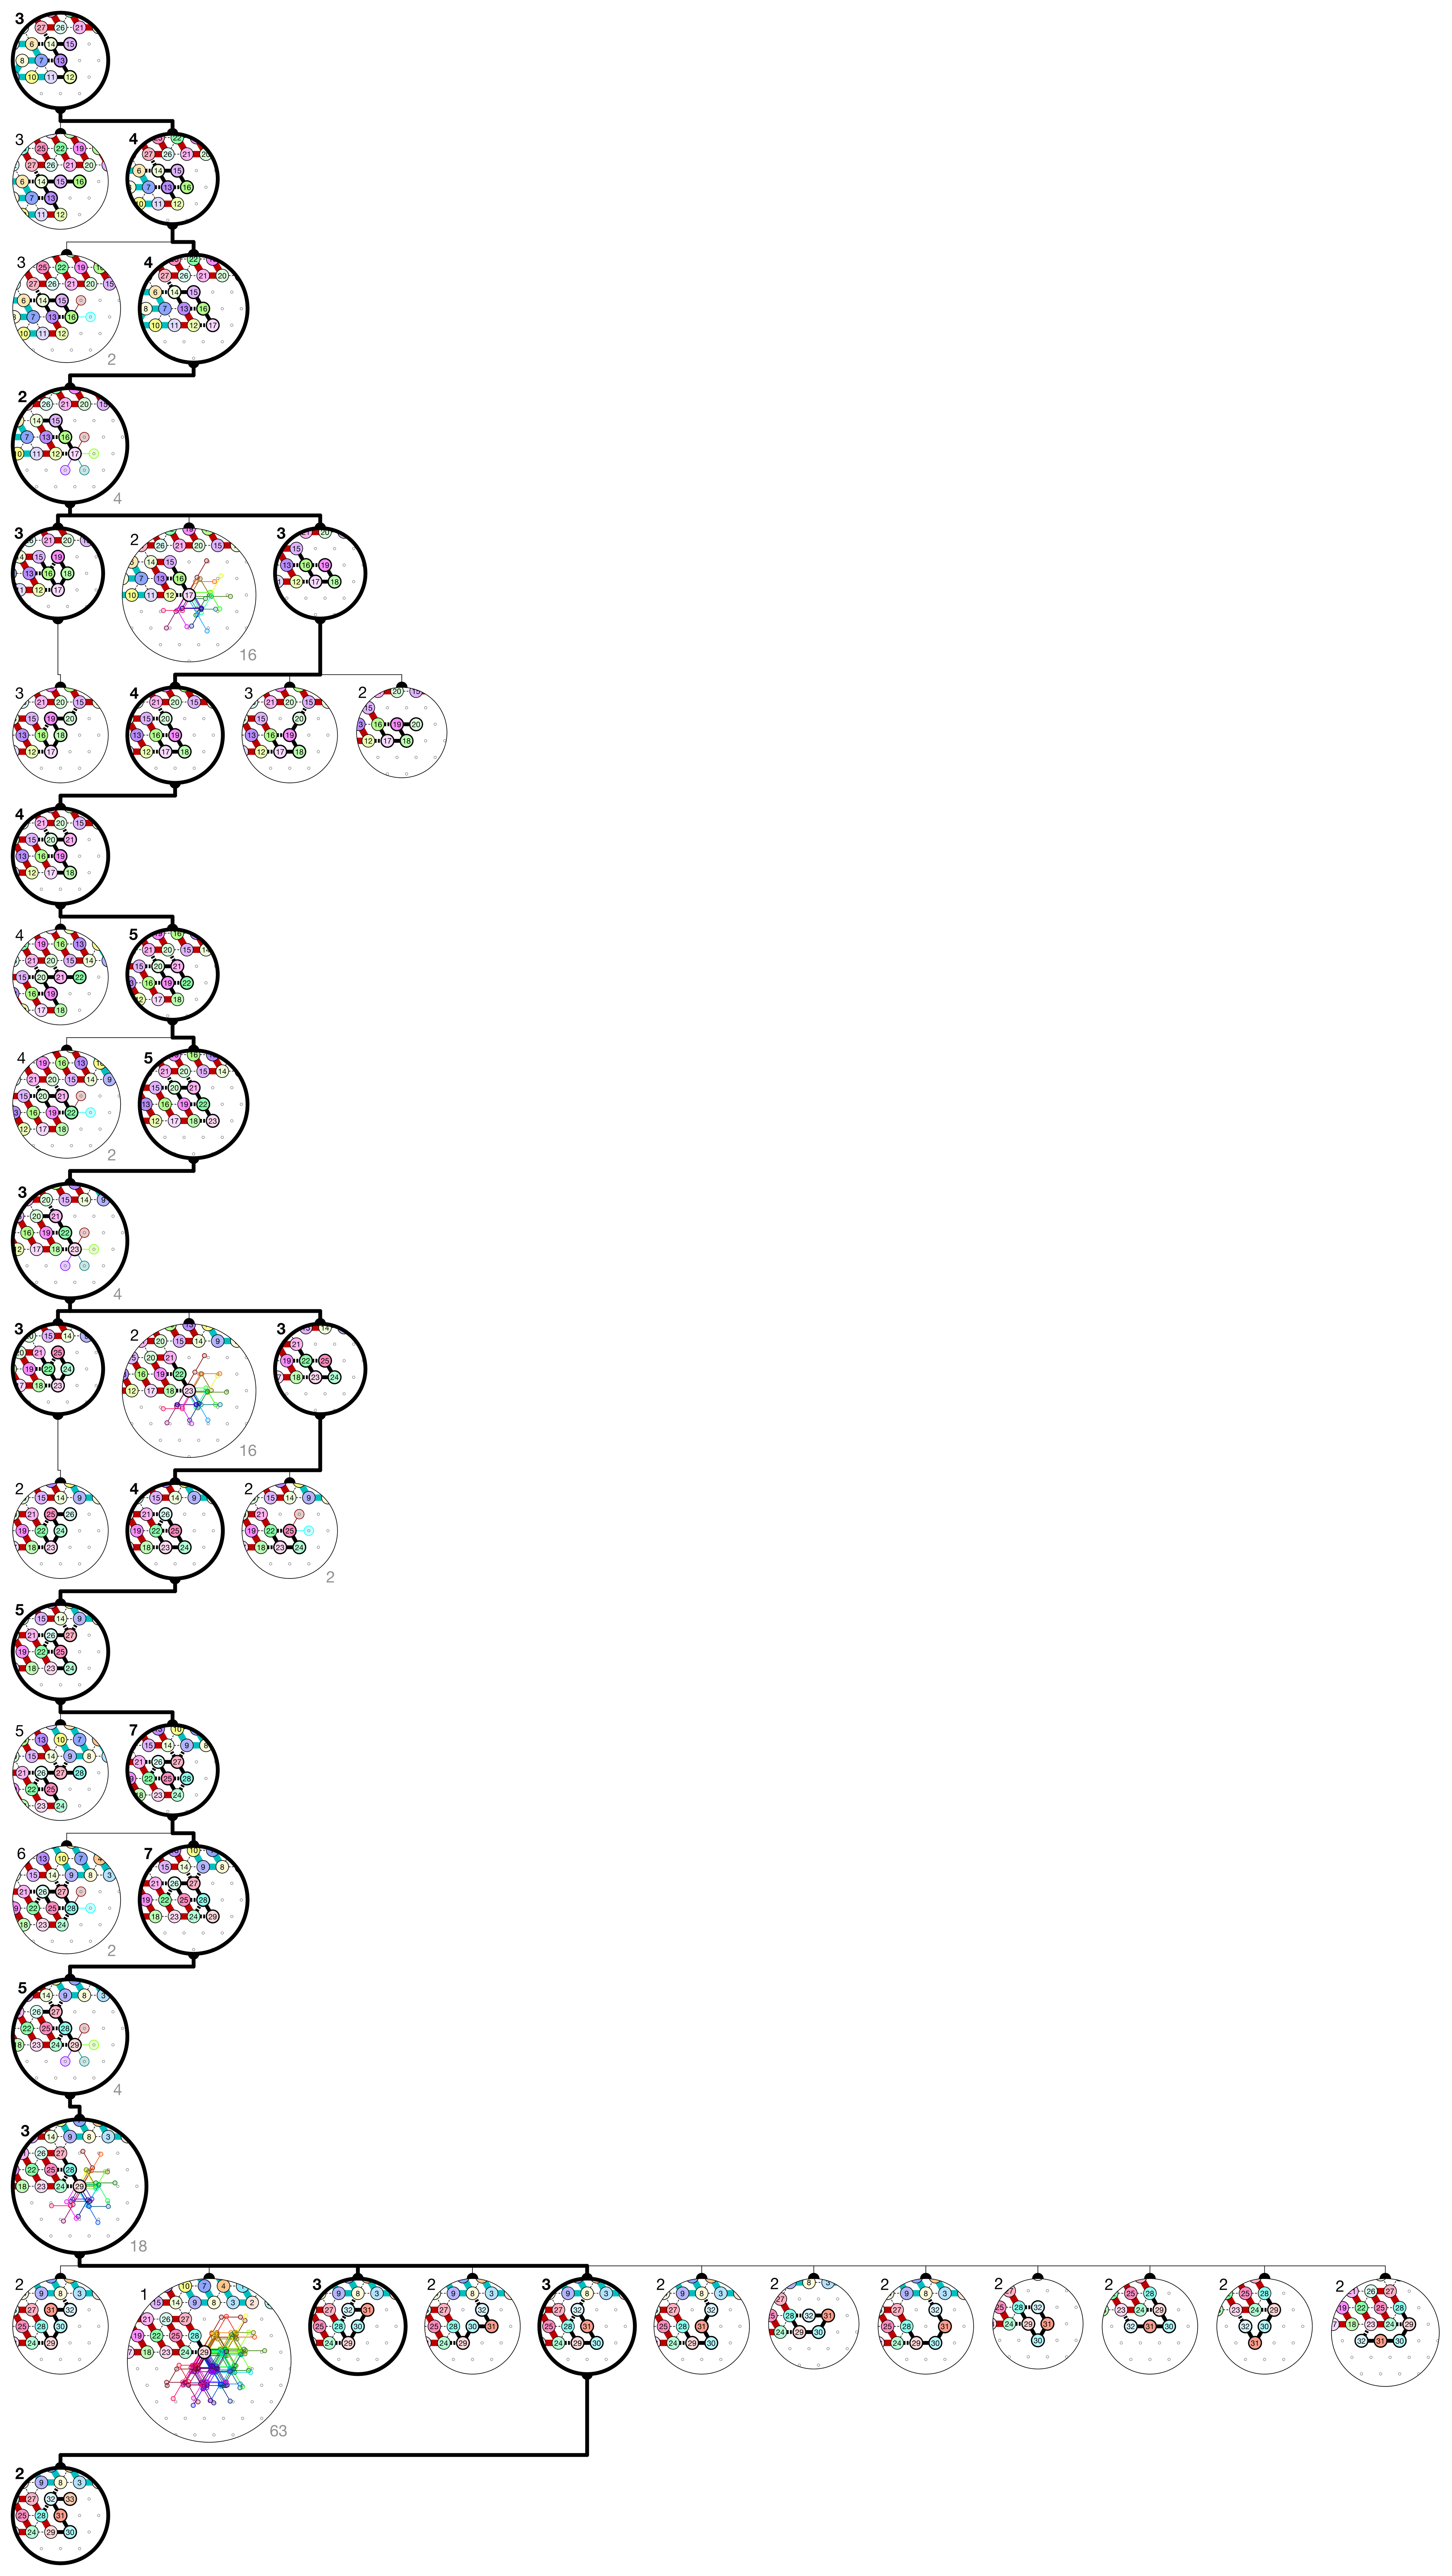

Supplement: s2 [file s2]

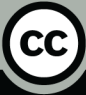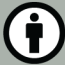

BY

Supplement: s2 [file s2]

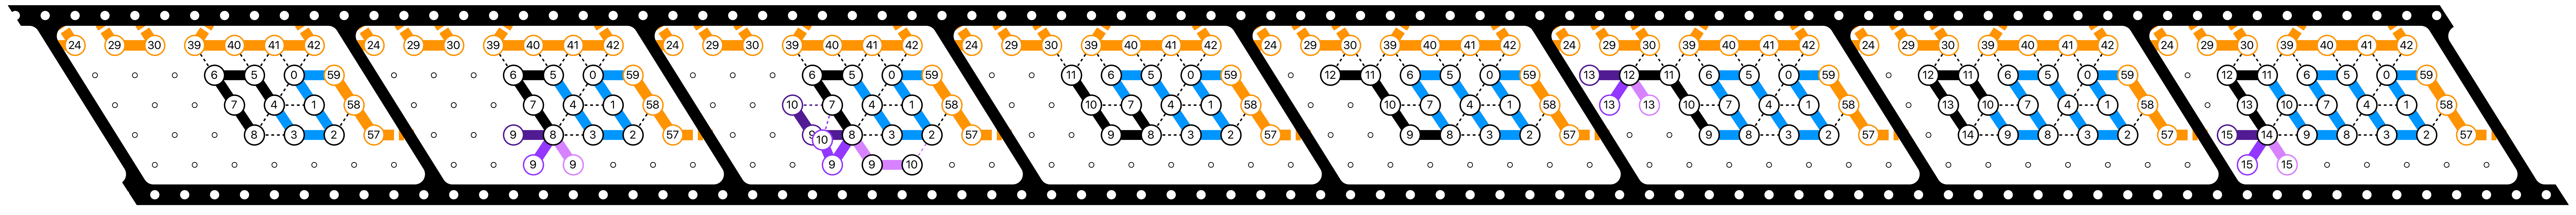

Supplement: s2 [file s2]

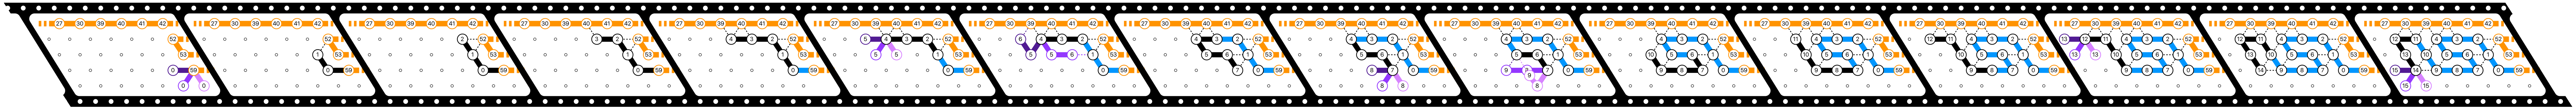

Supplement: s2 [file s2]

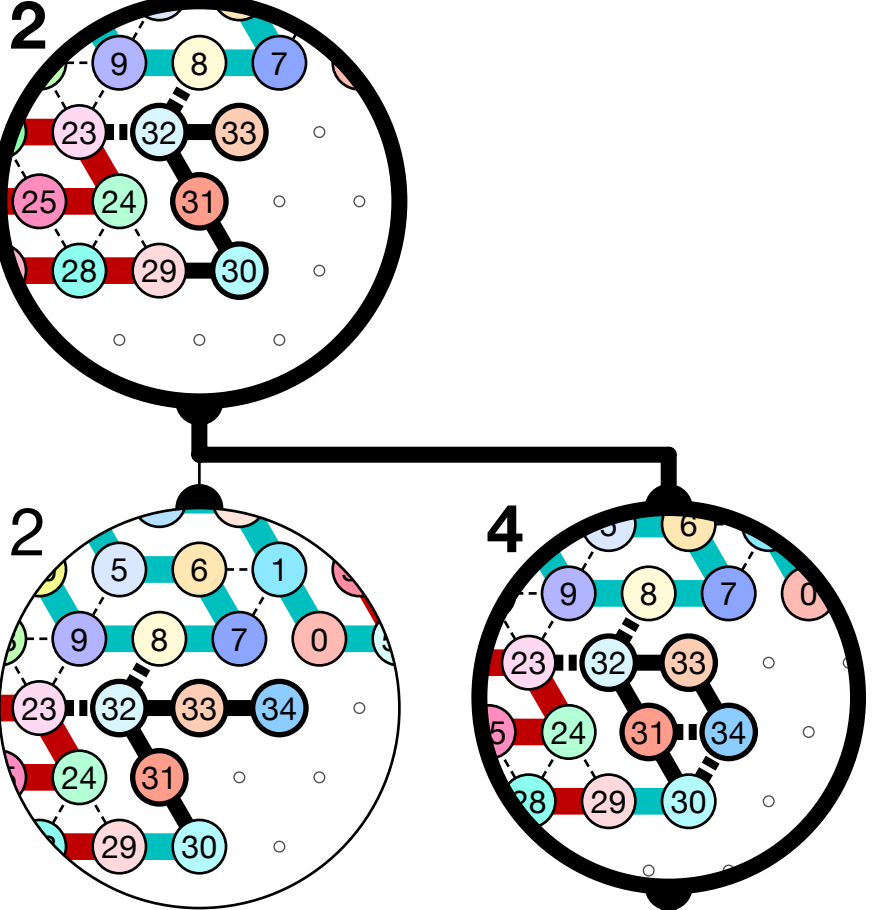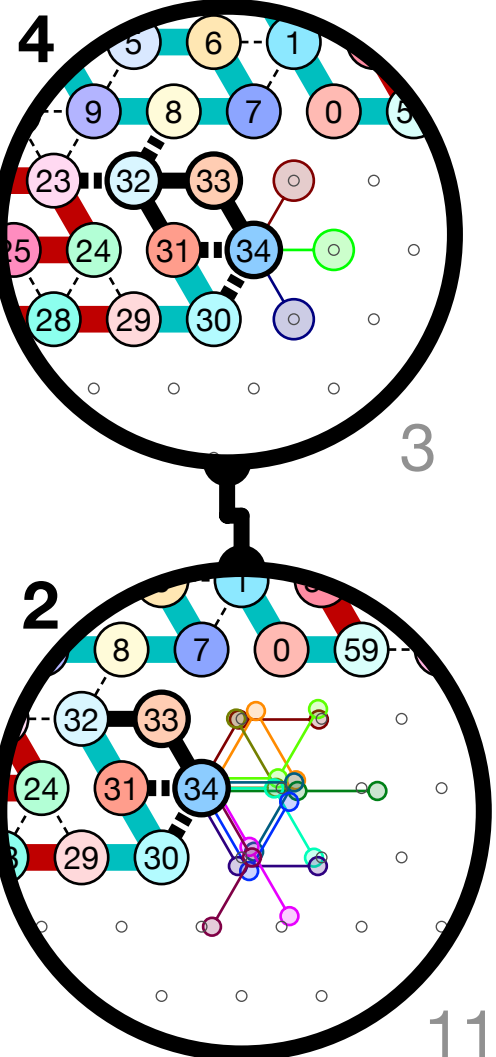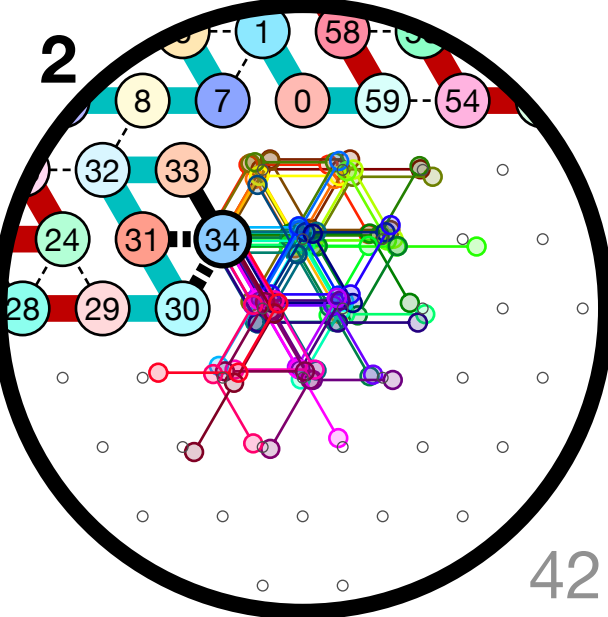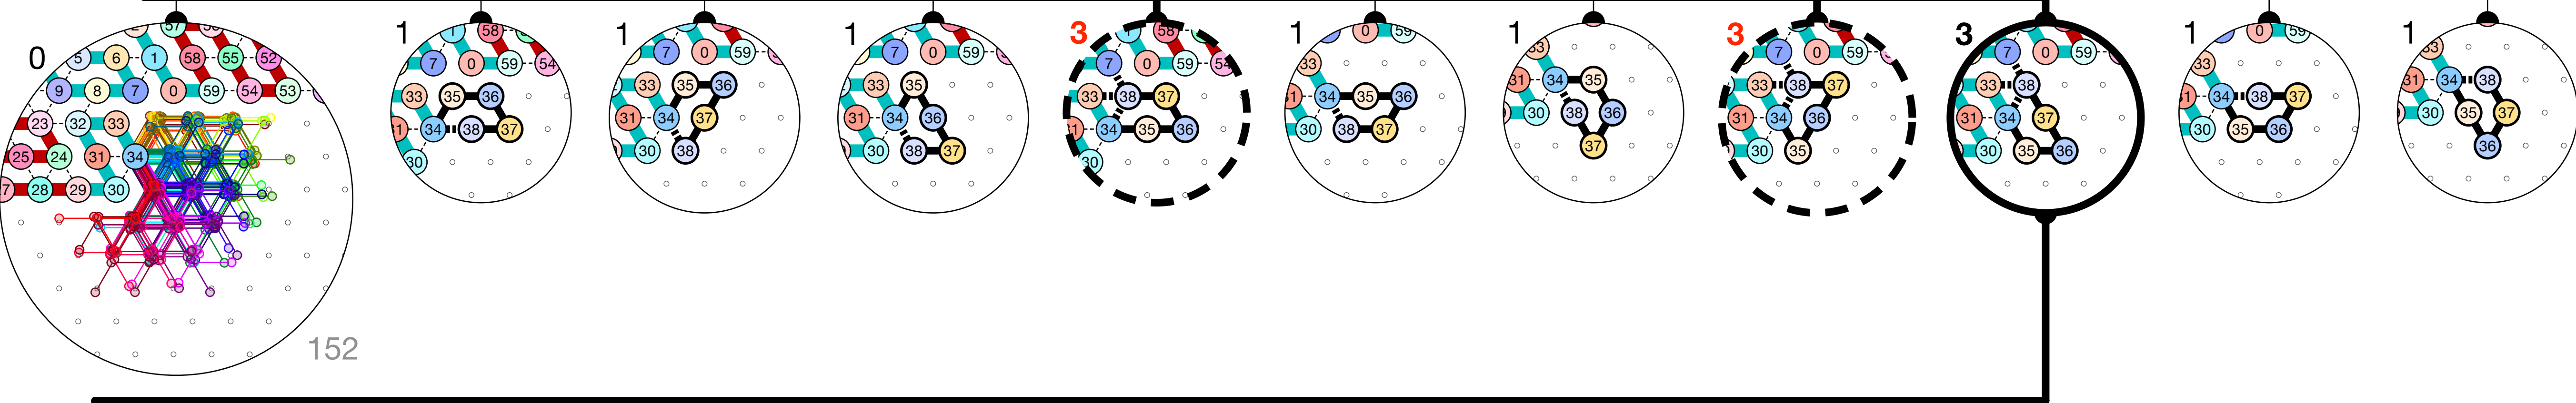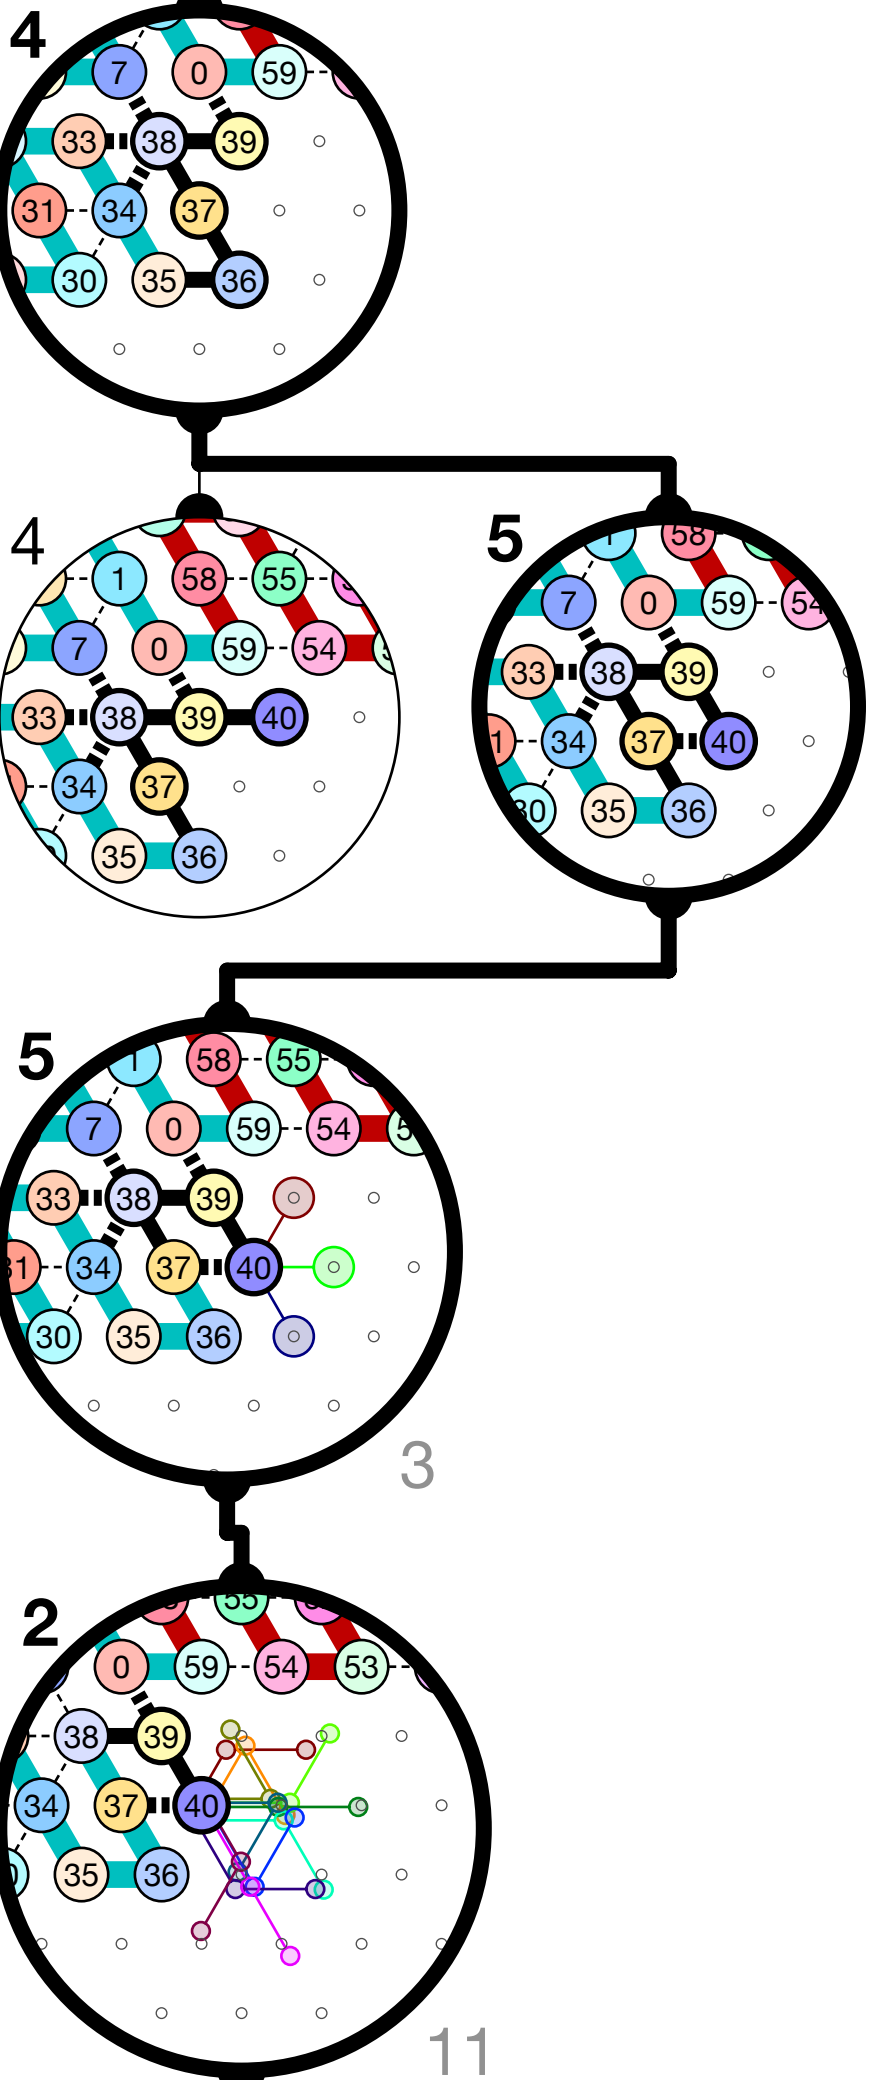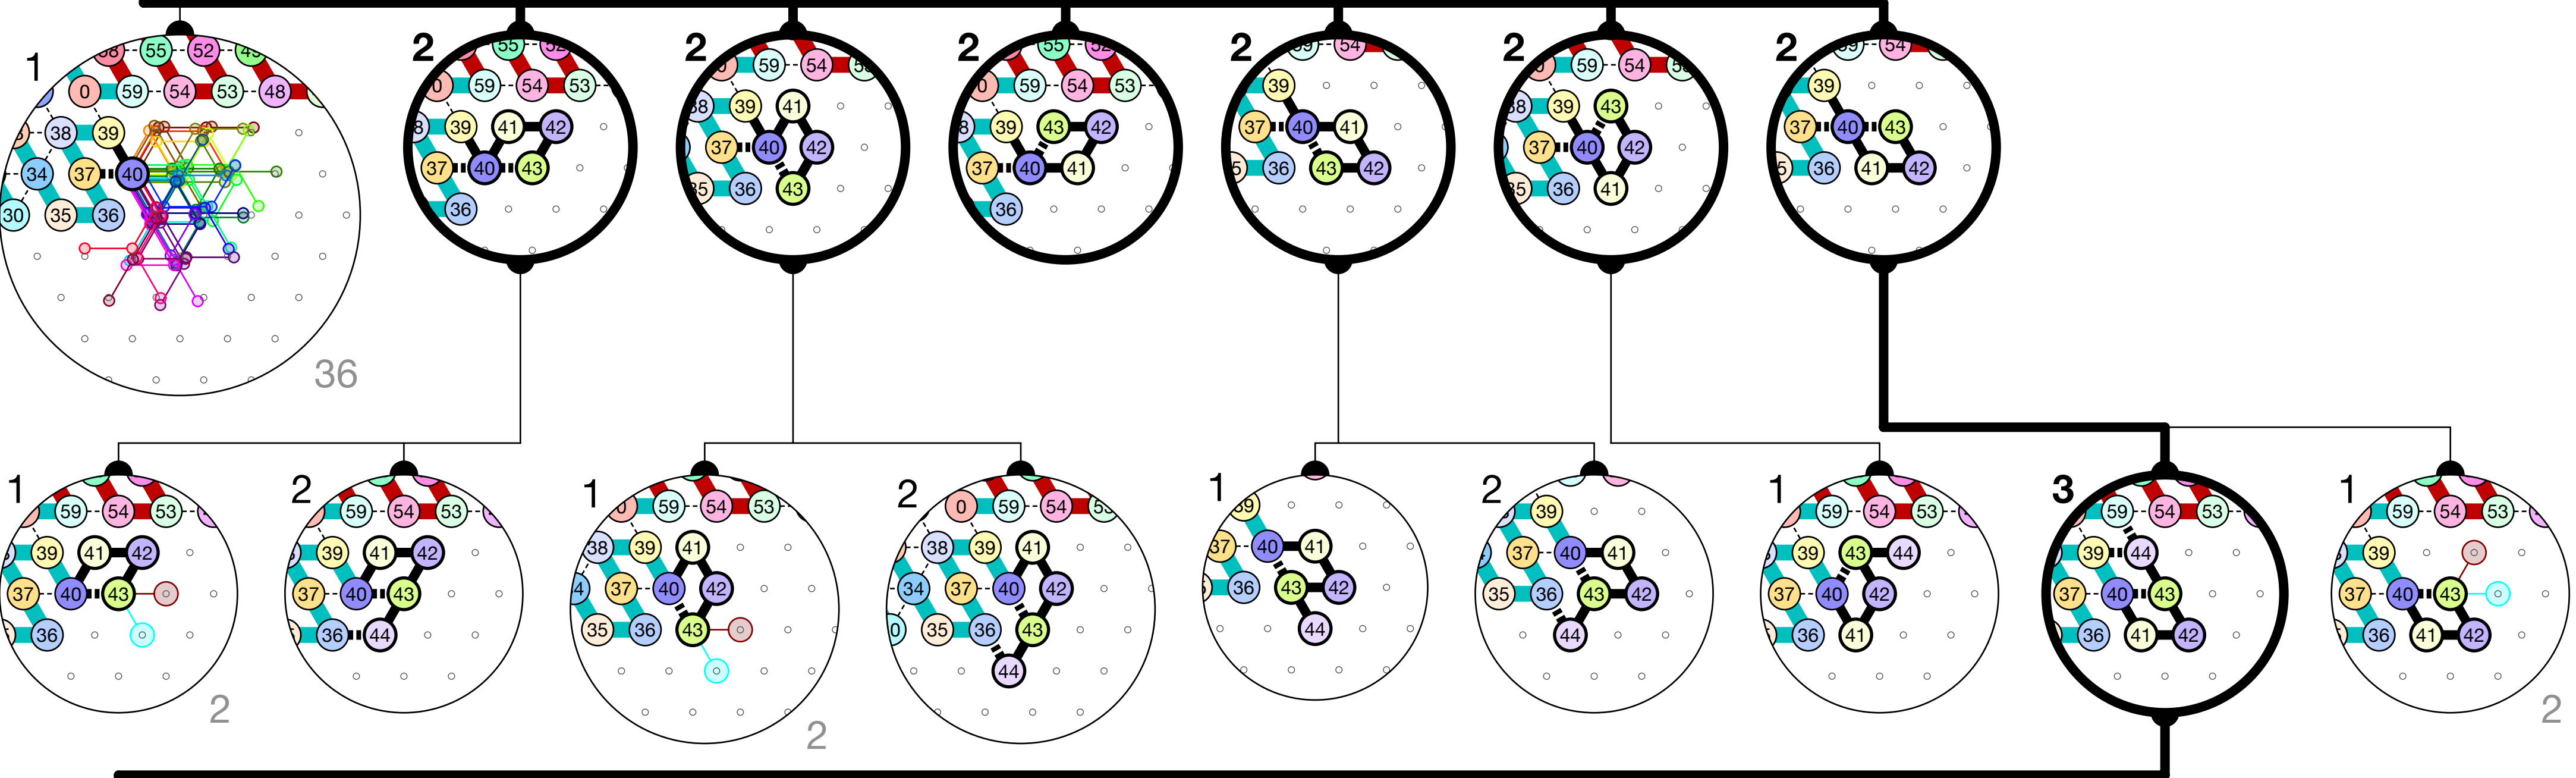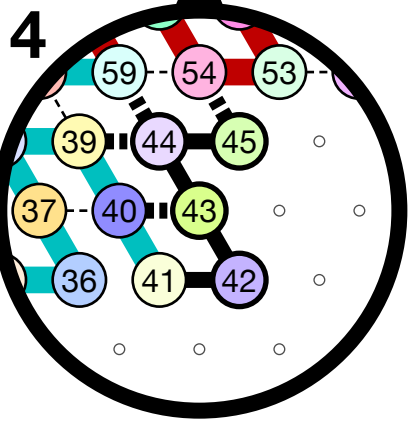

Supplement: s2 [file s2]

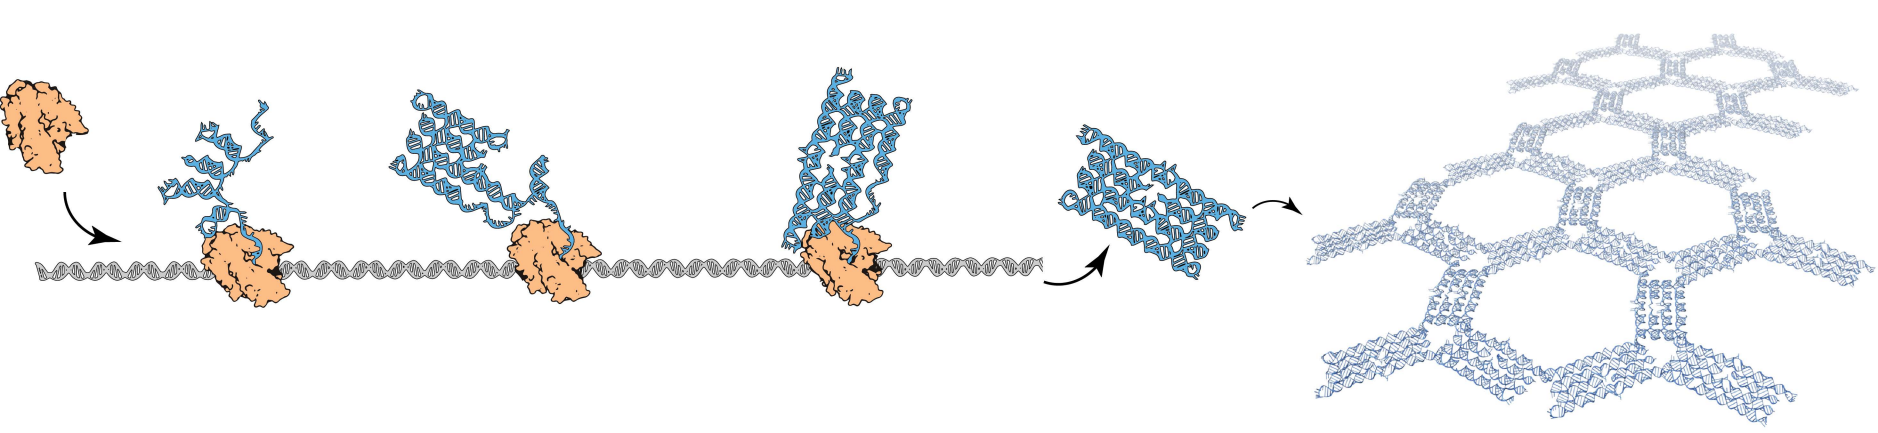

Supplement: s2 [file s2]

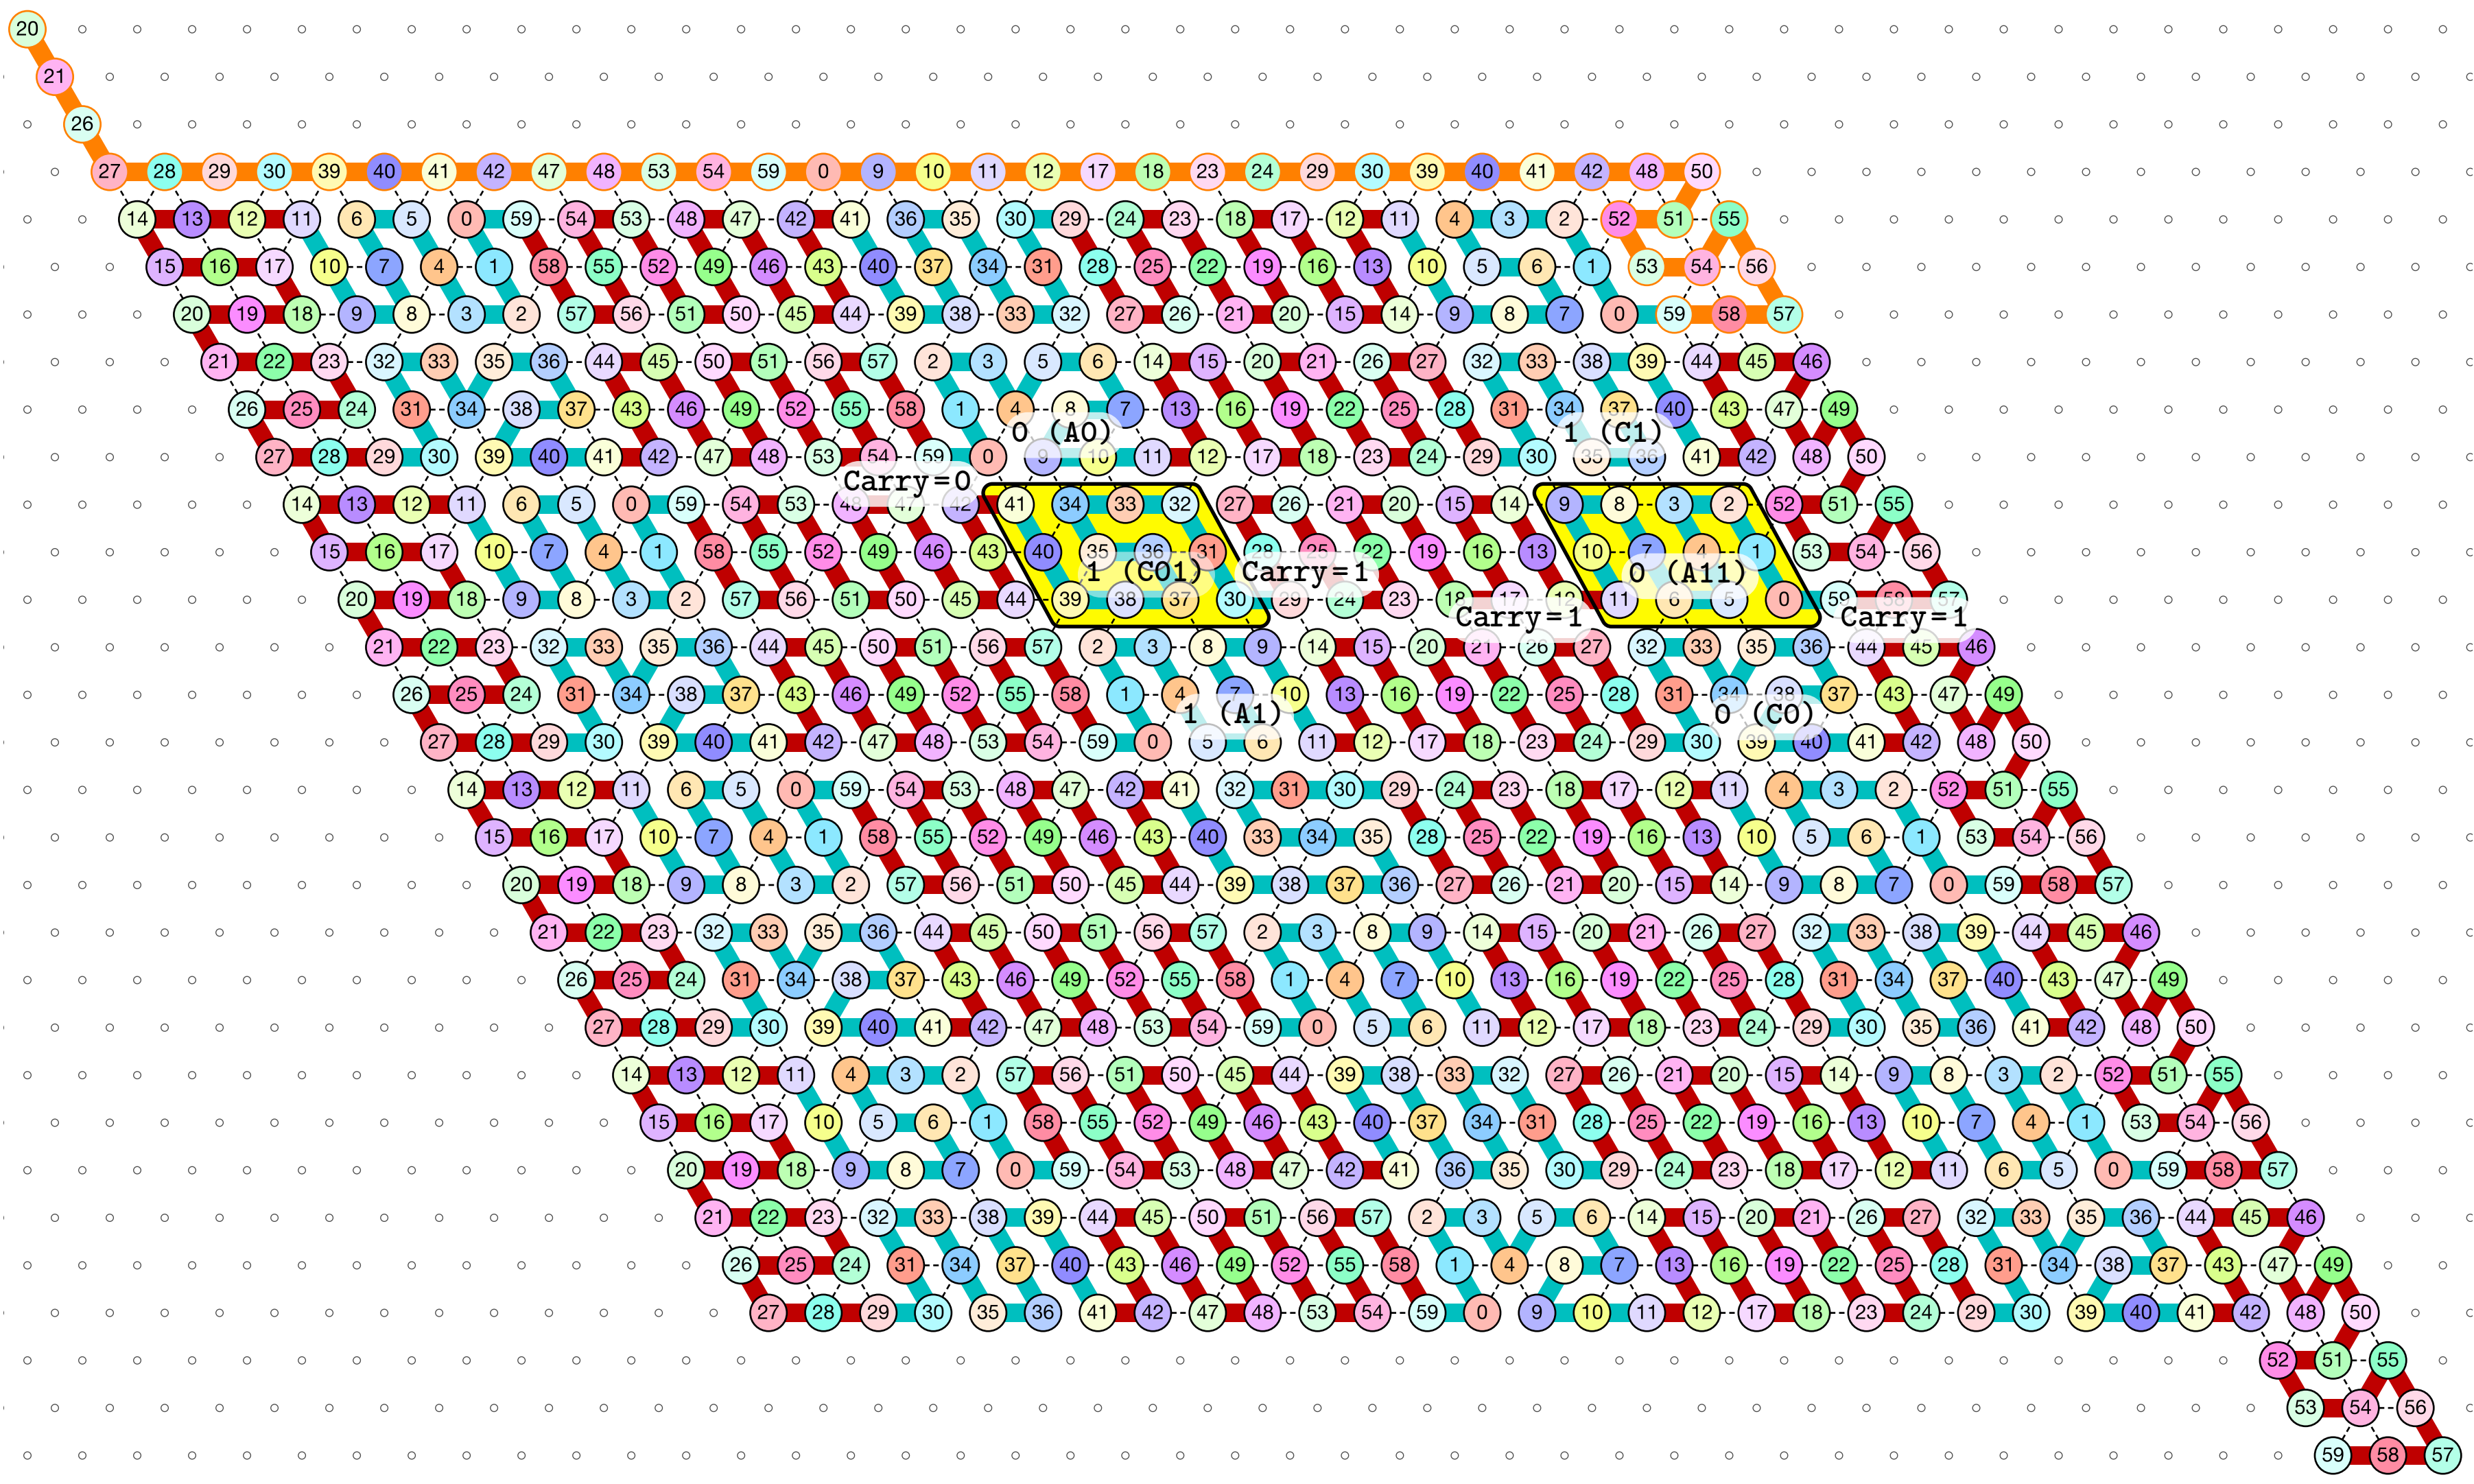

Supplement: s2 [file s2]

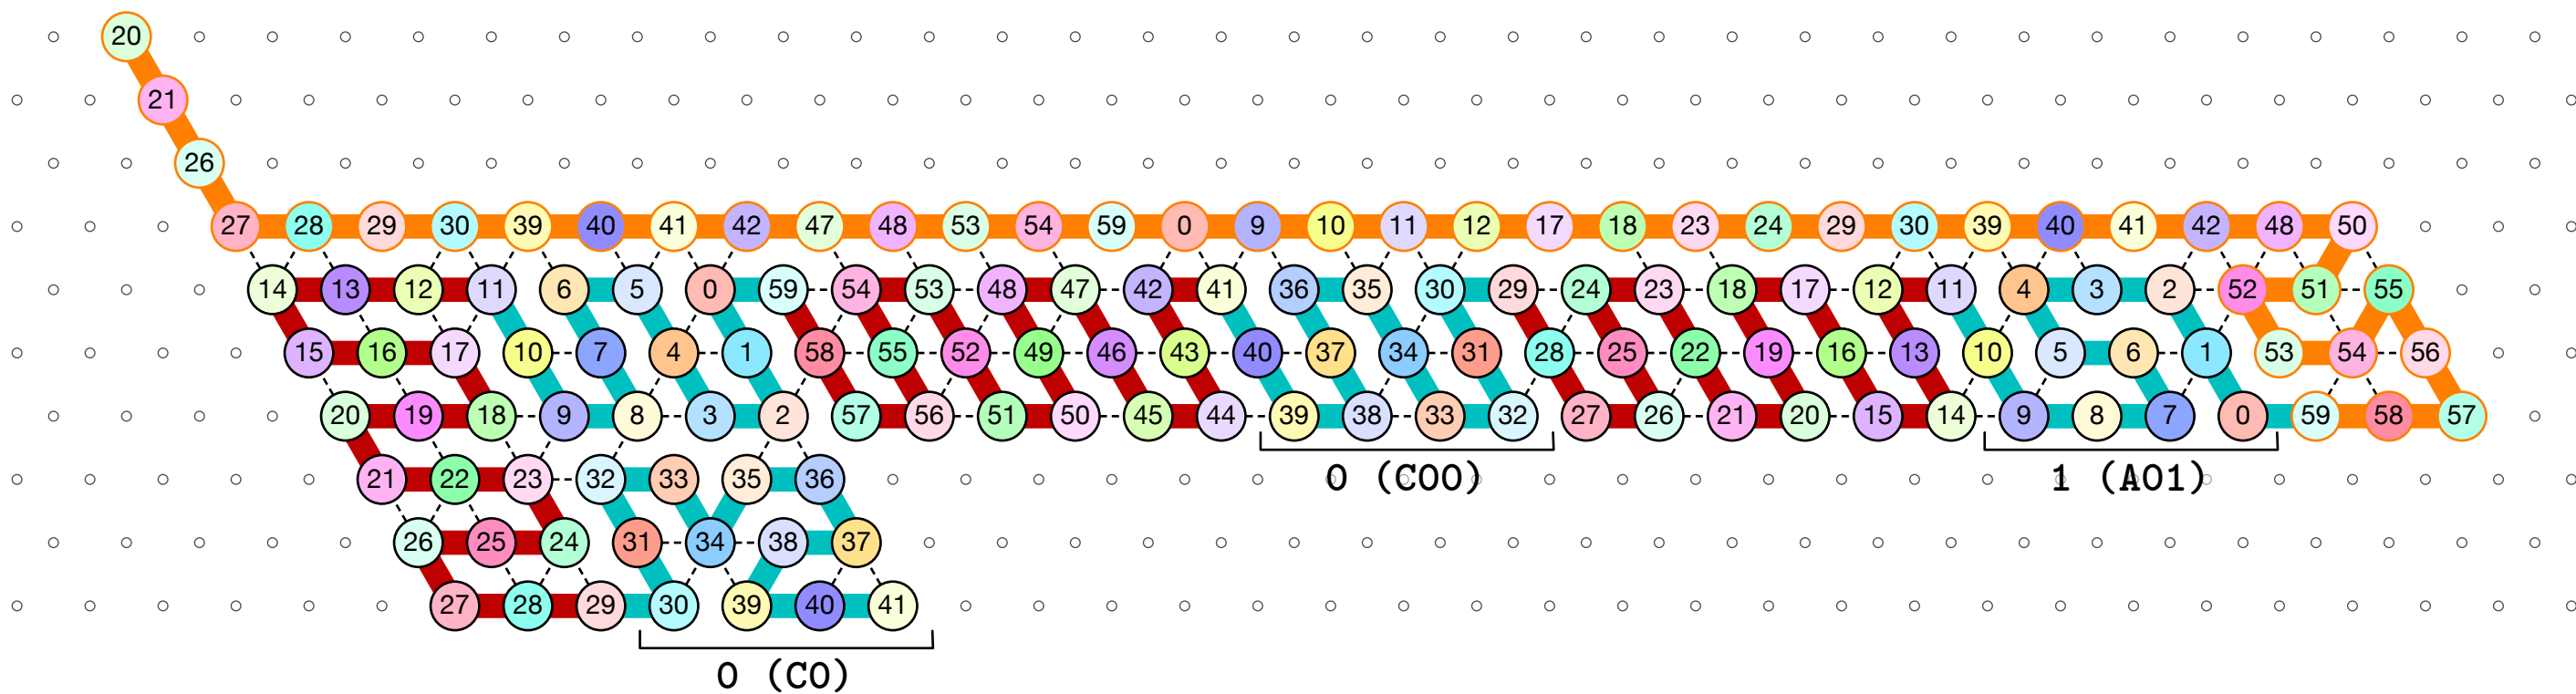

Supplement: s2 [file s2]

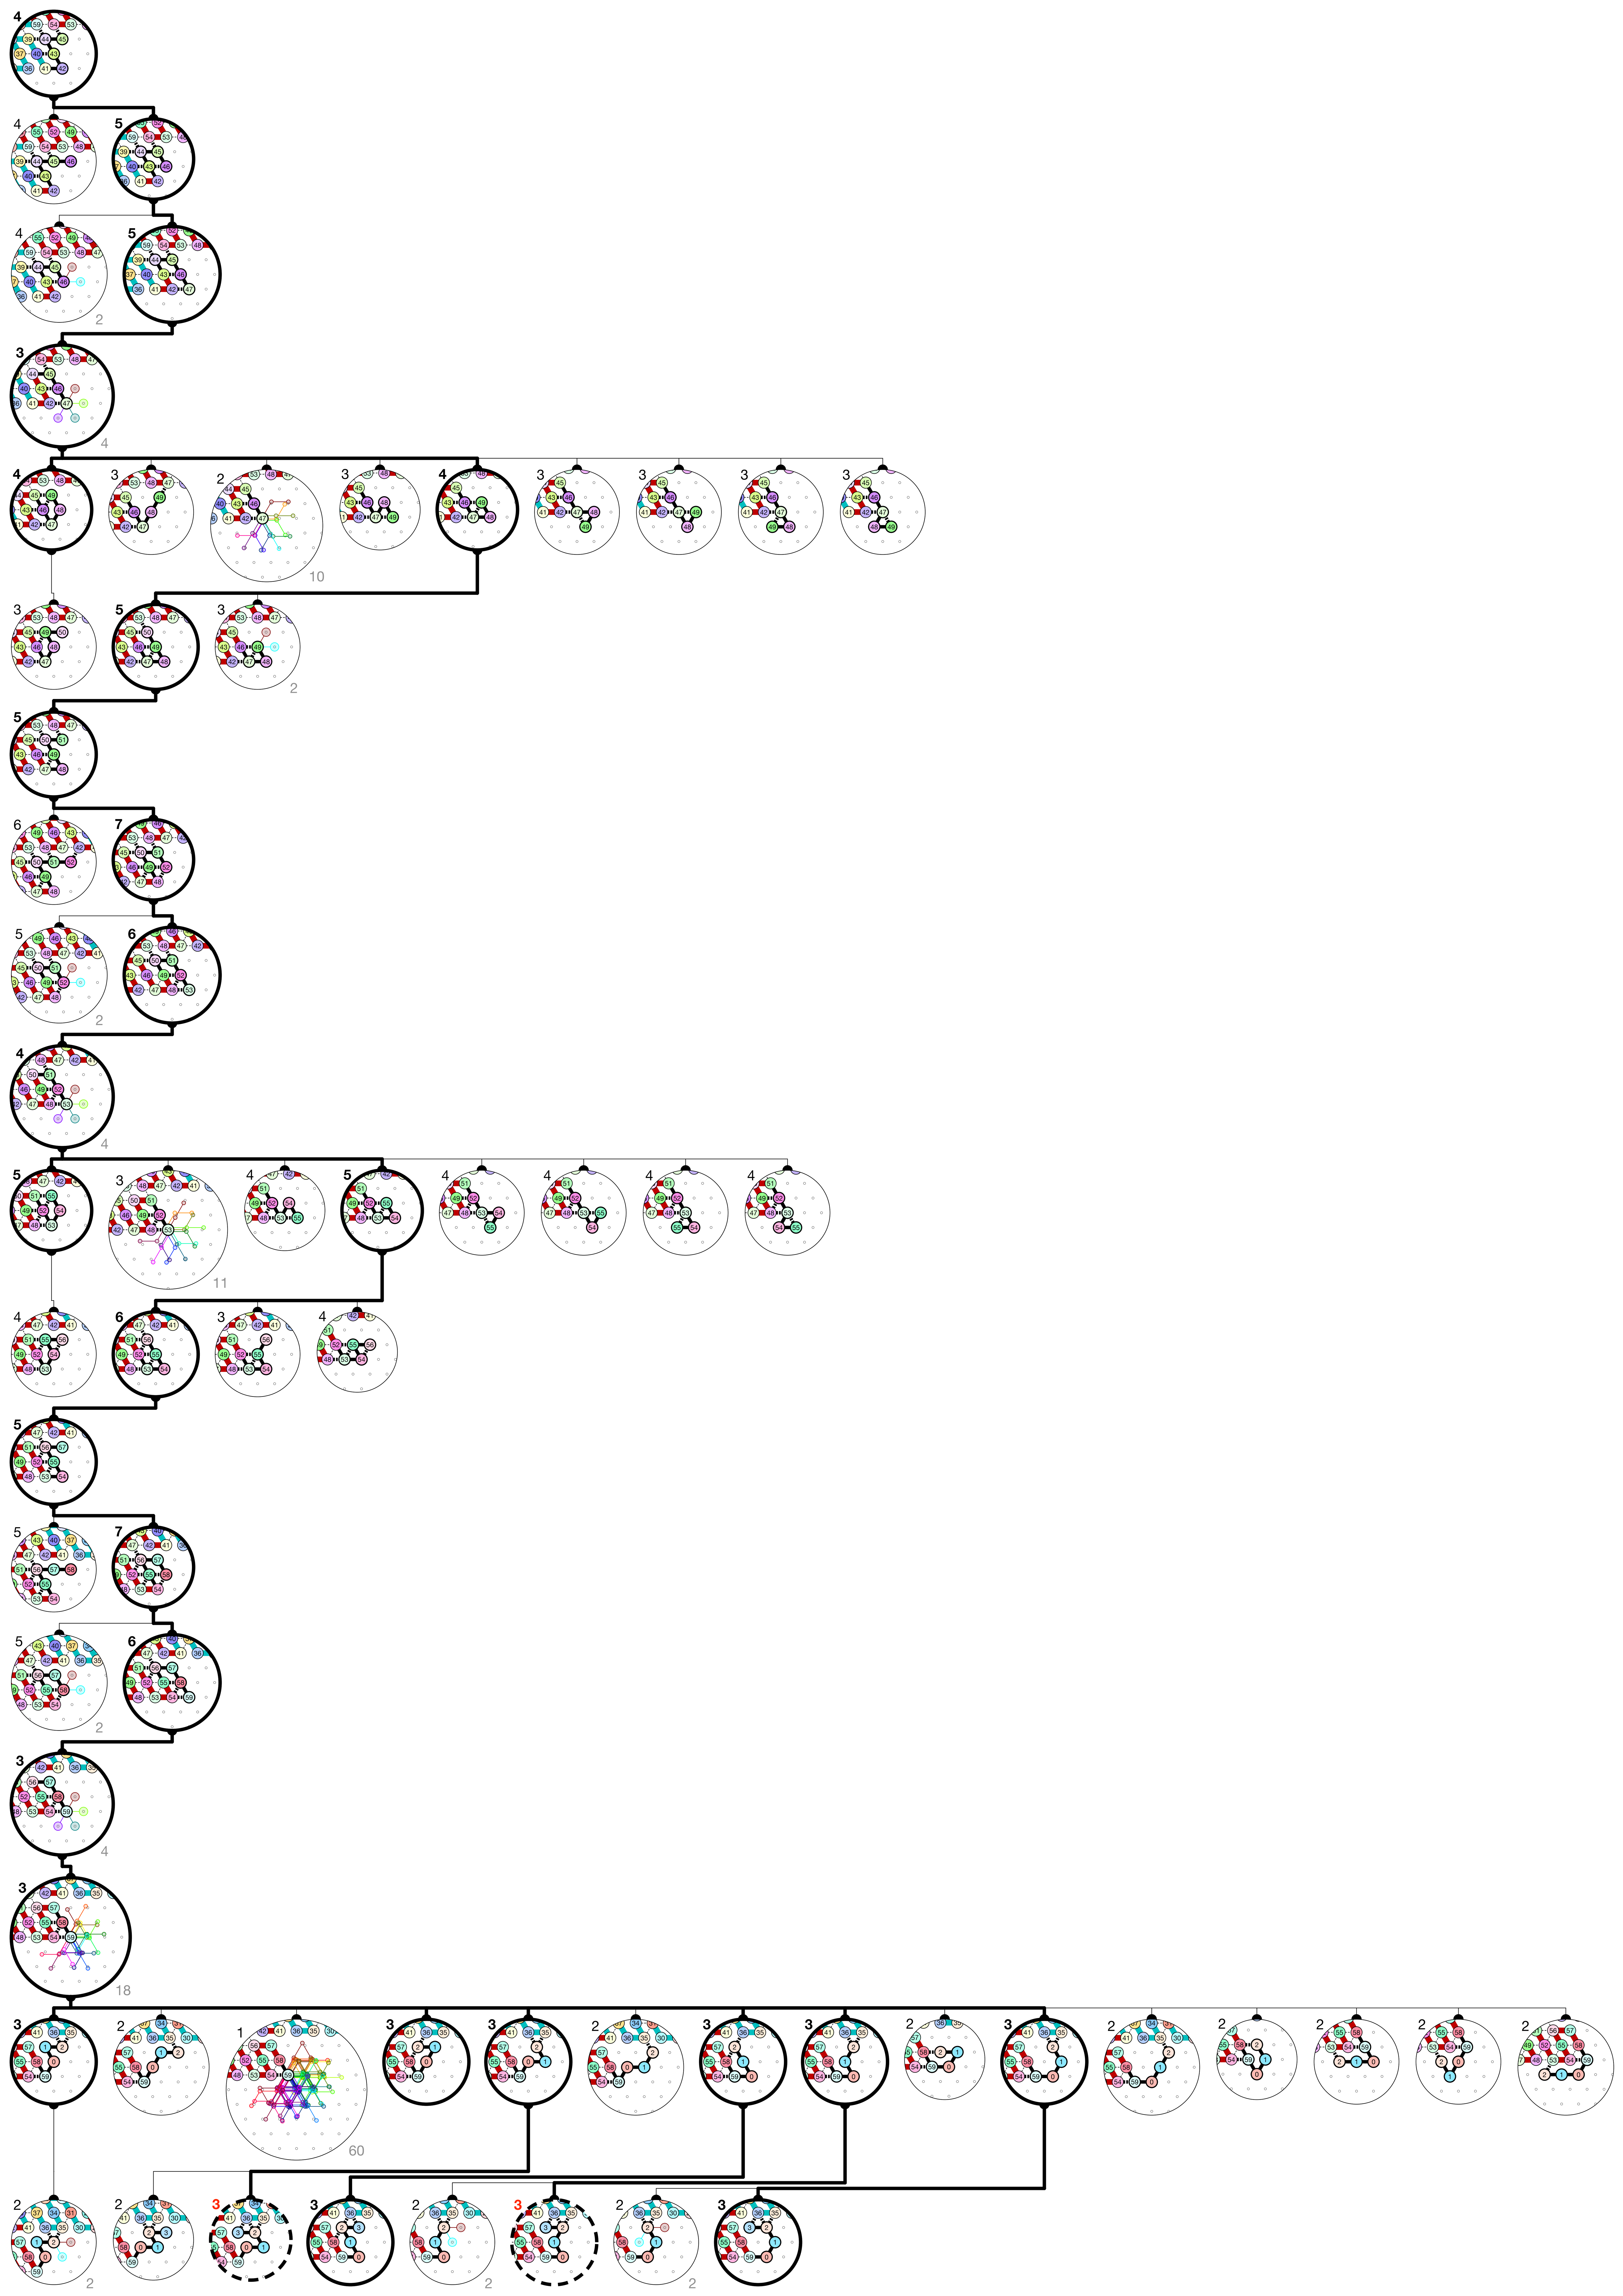

Supplement: s2 [file s2]

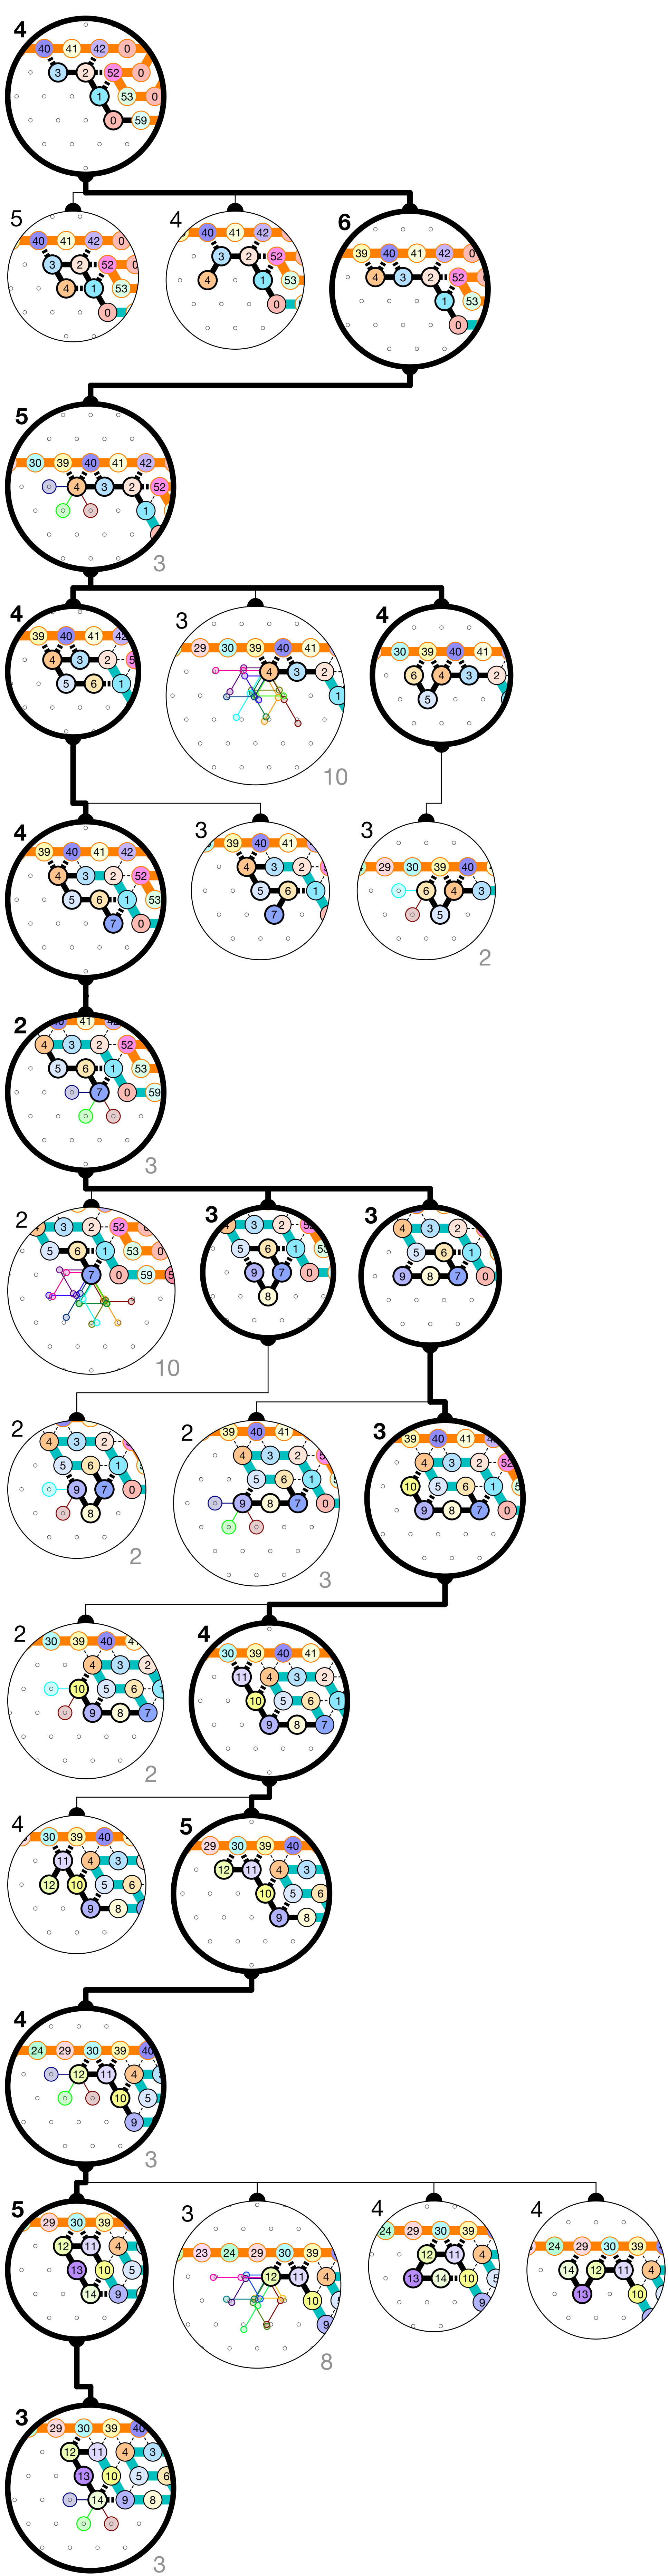

Supplement: s2 [file s2]

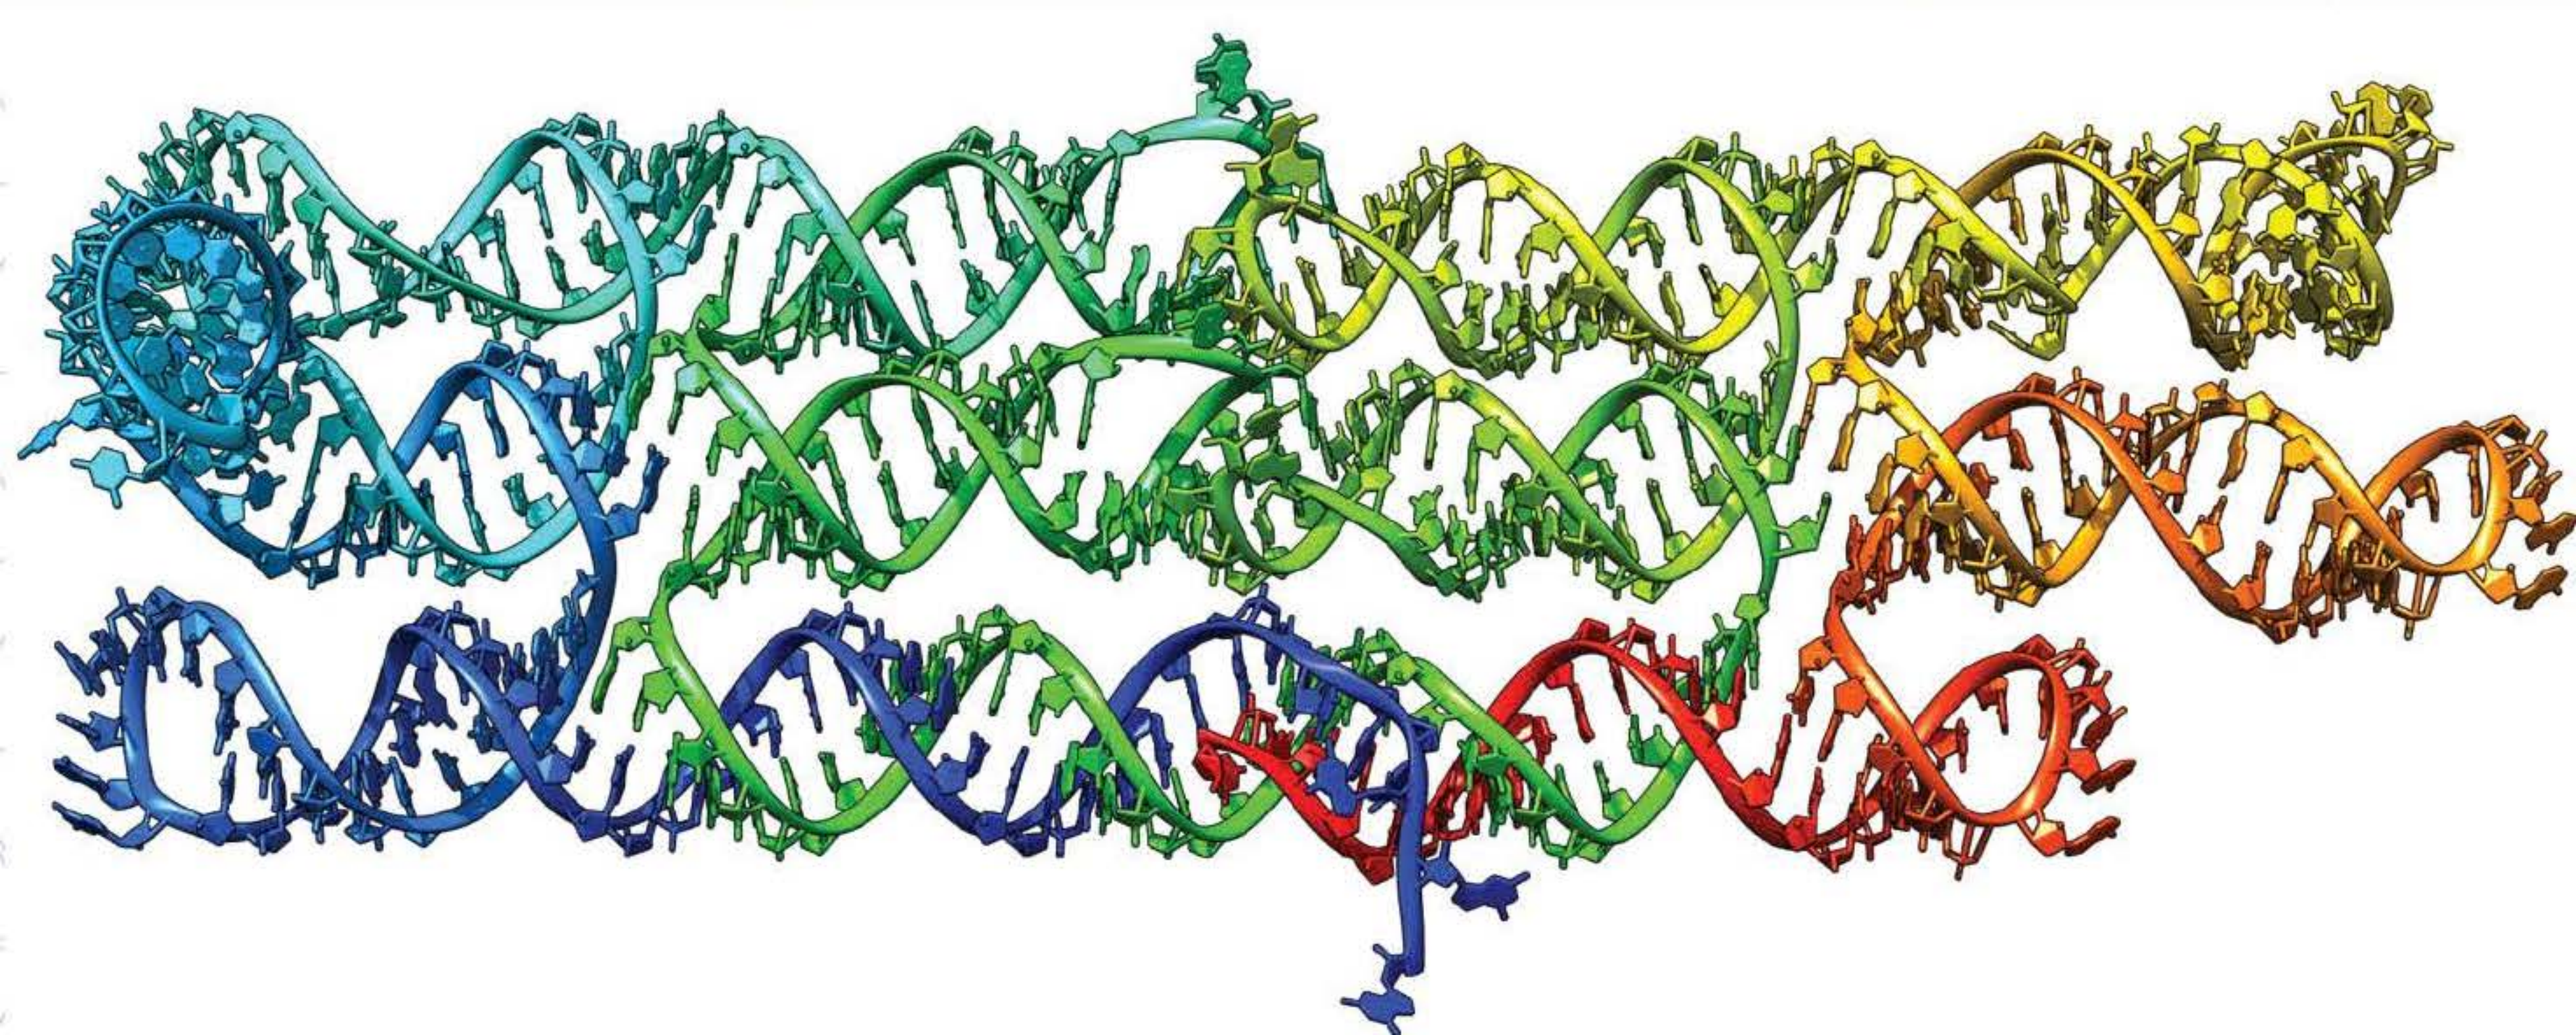

Supplement: s2 [file s2]

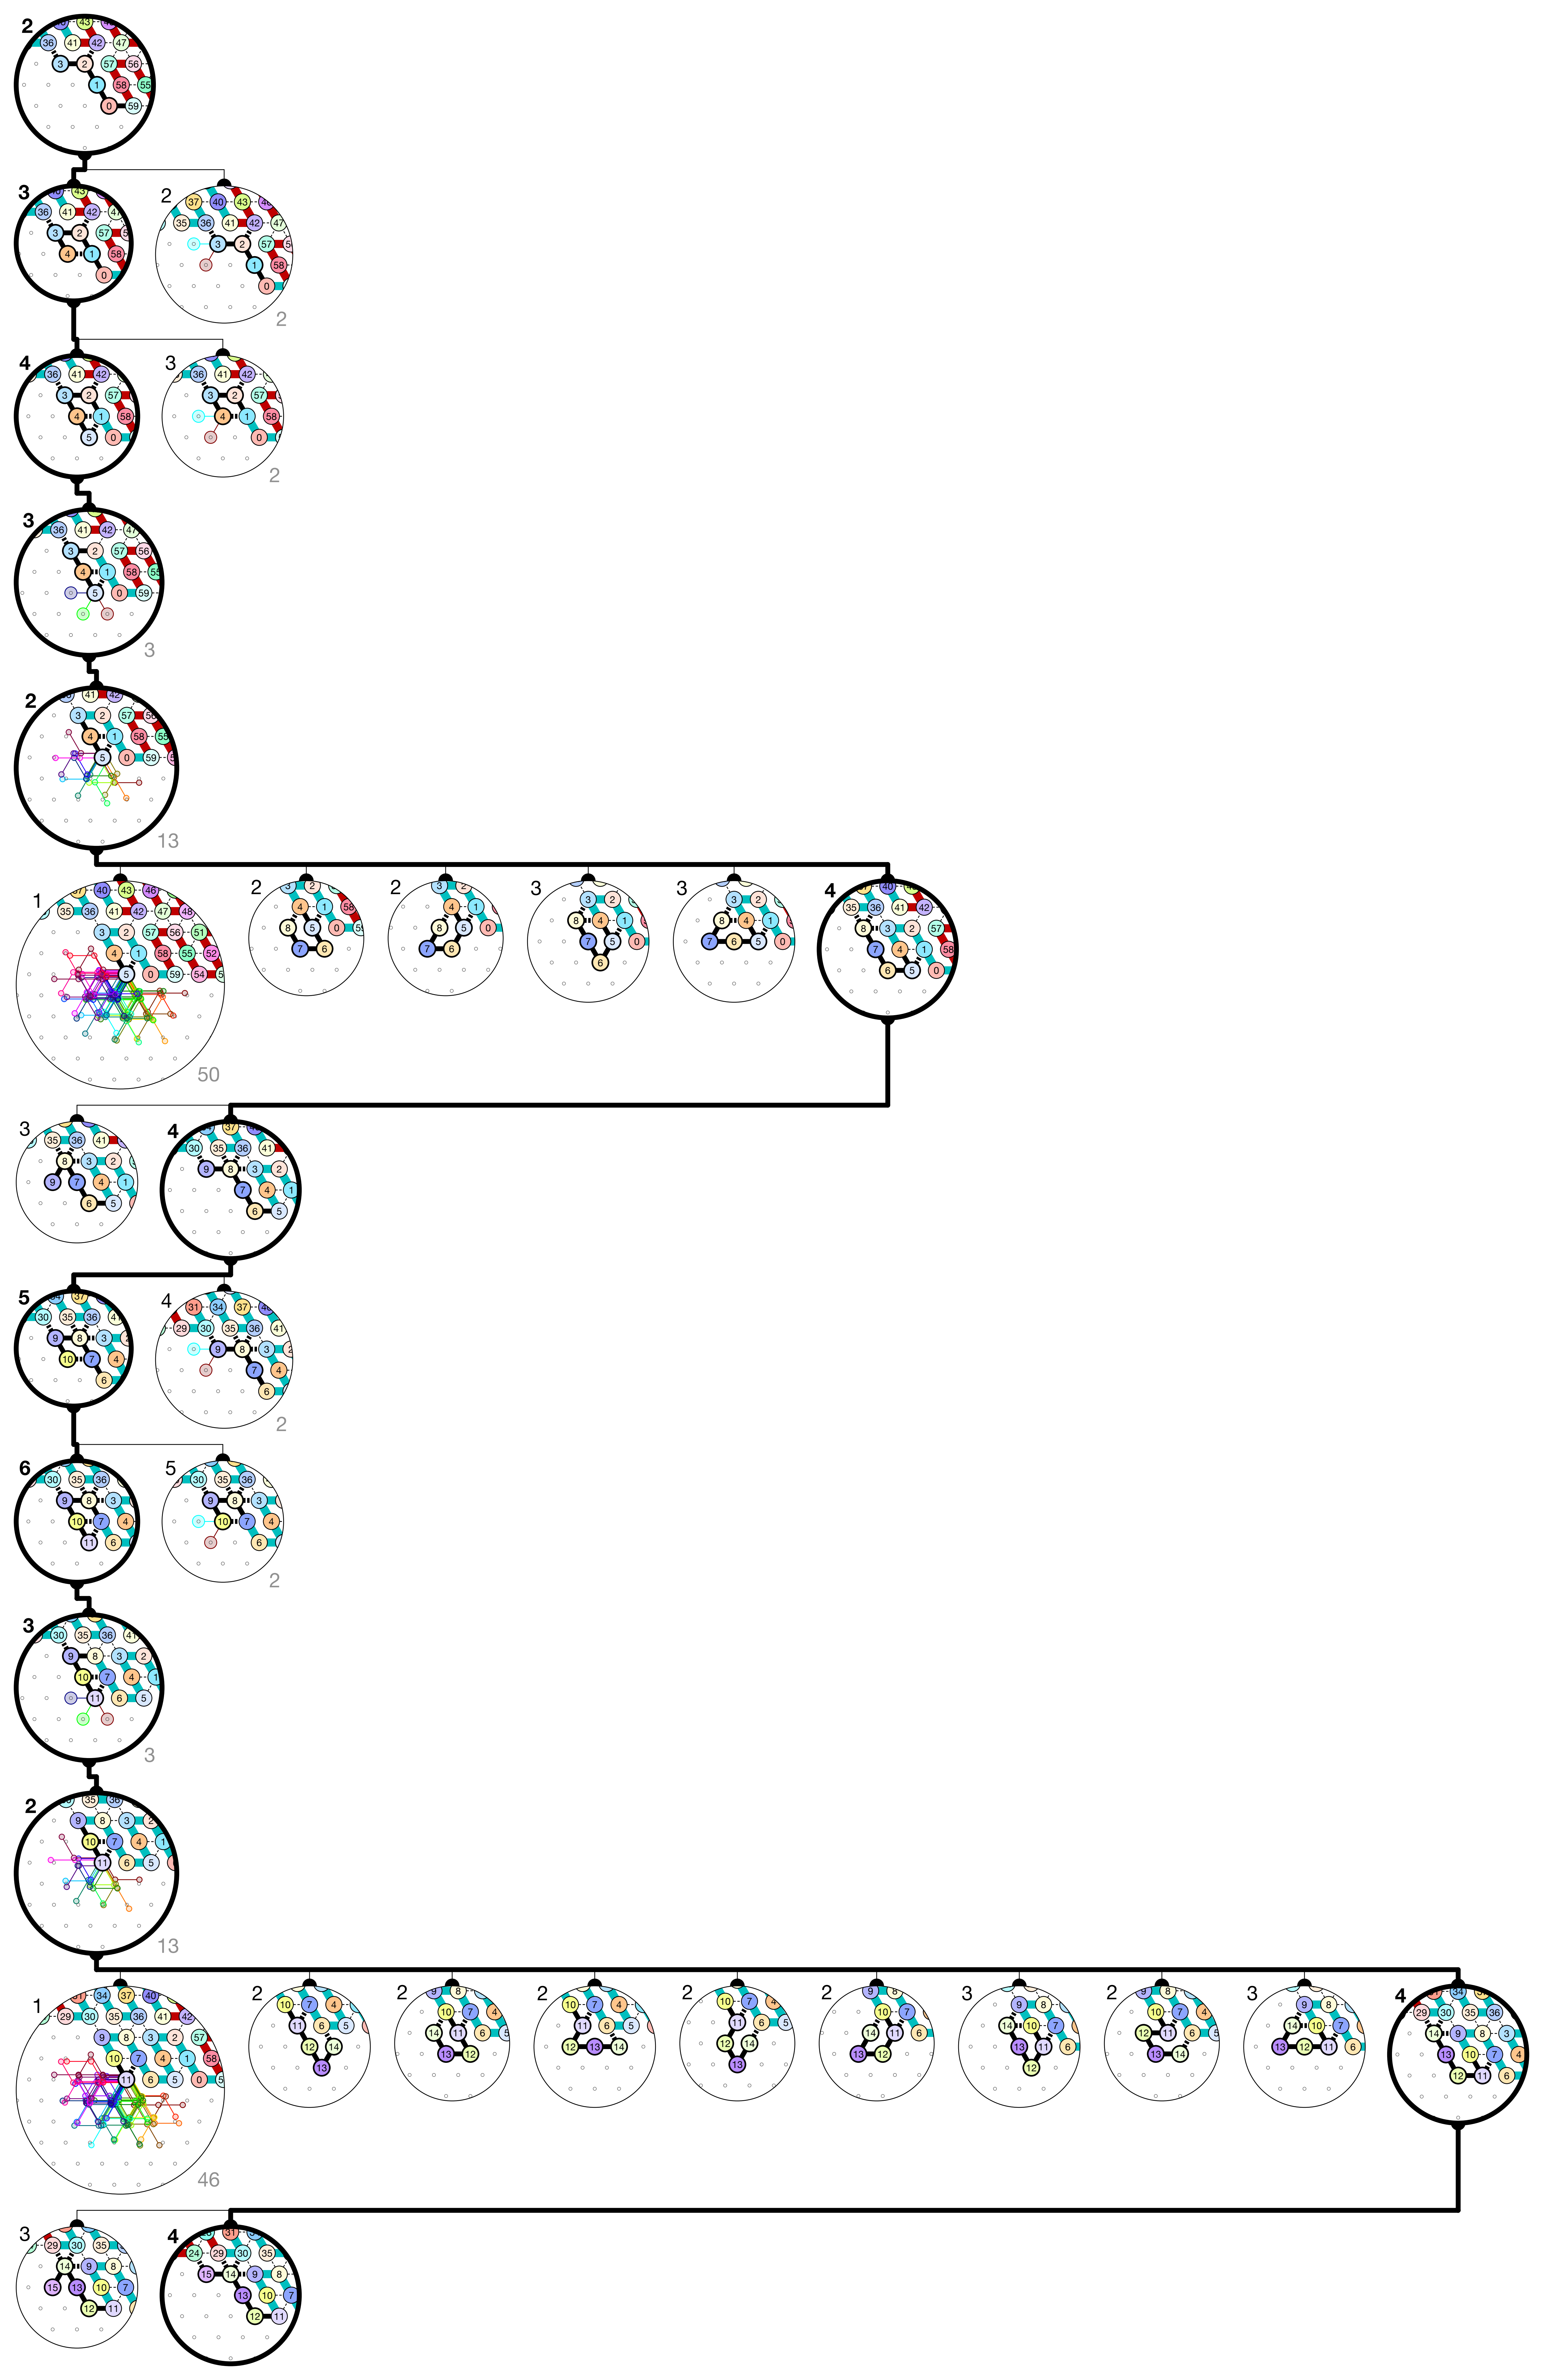

Supplement: s2 [file s2]

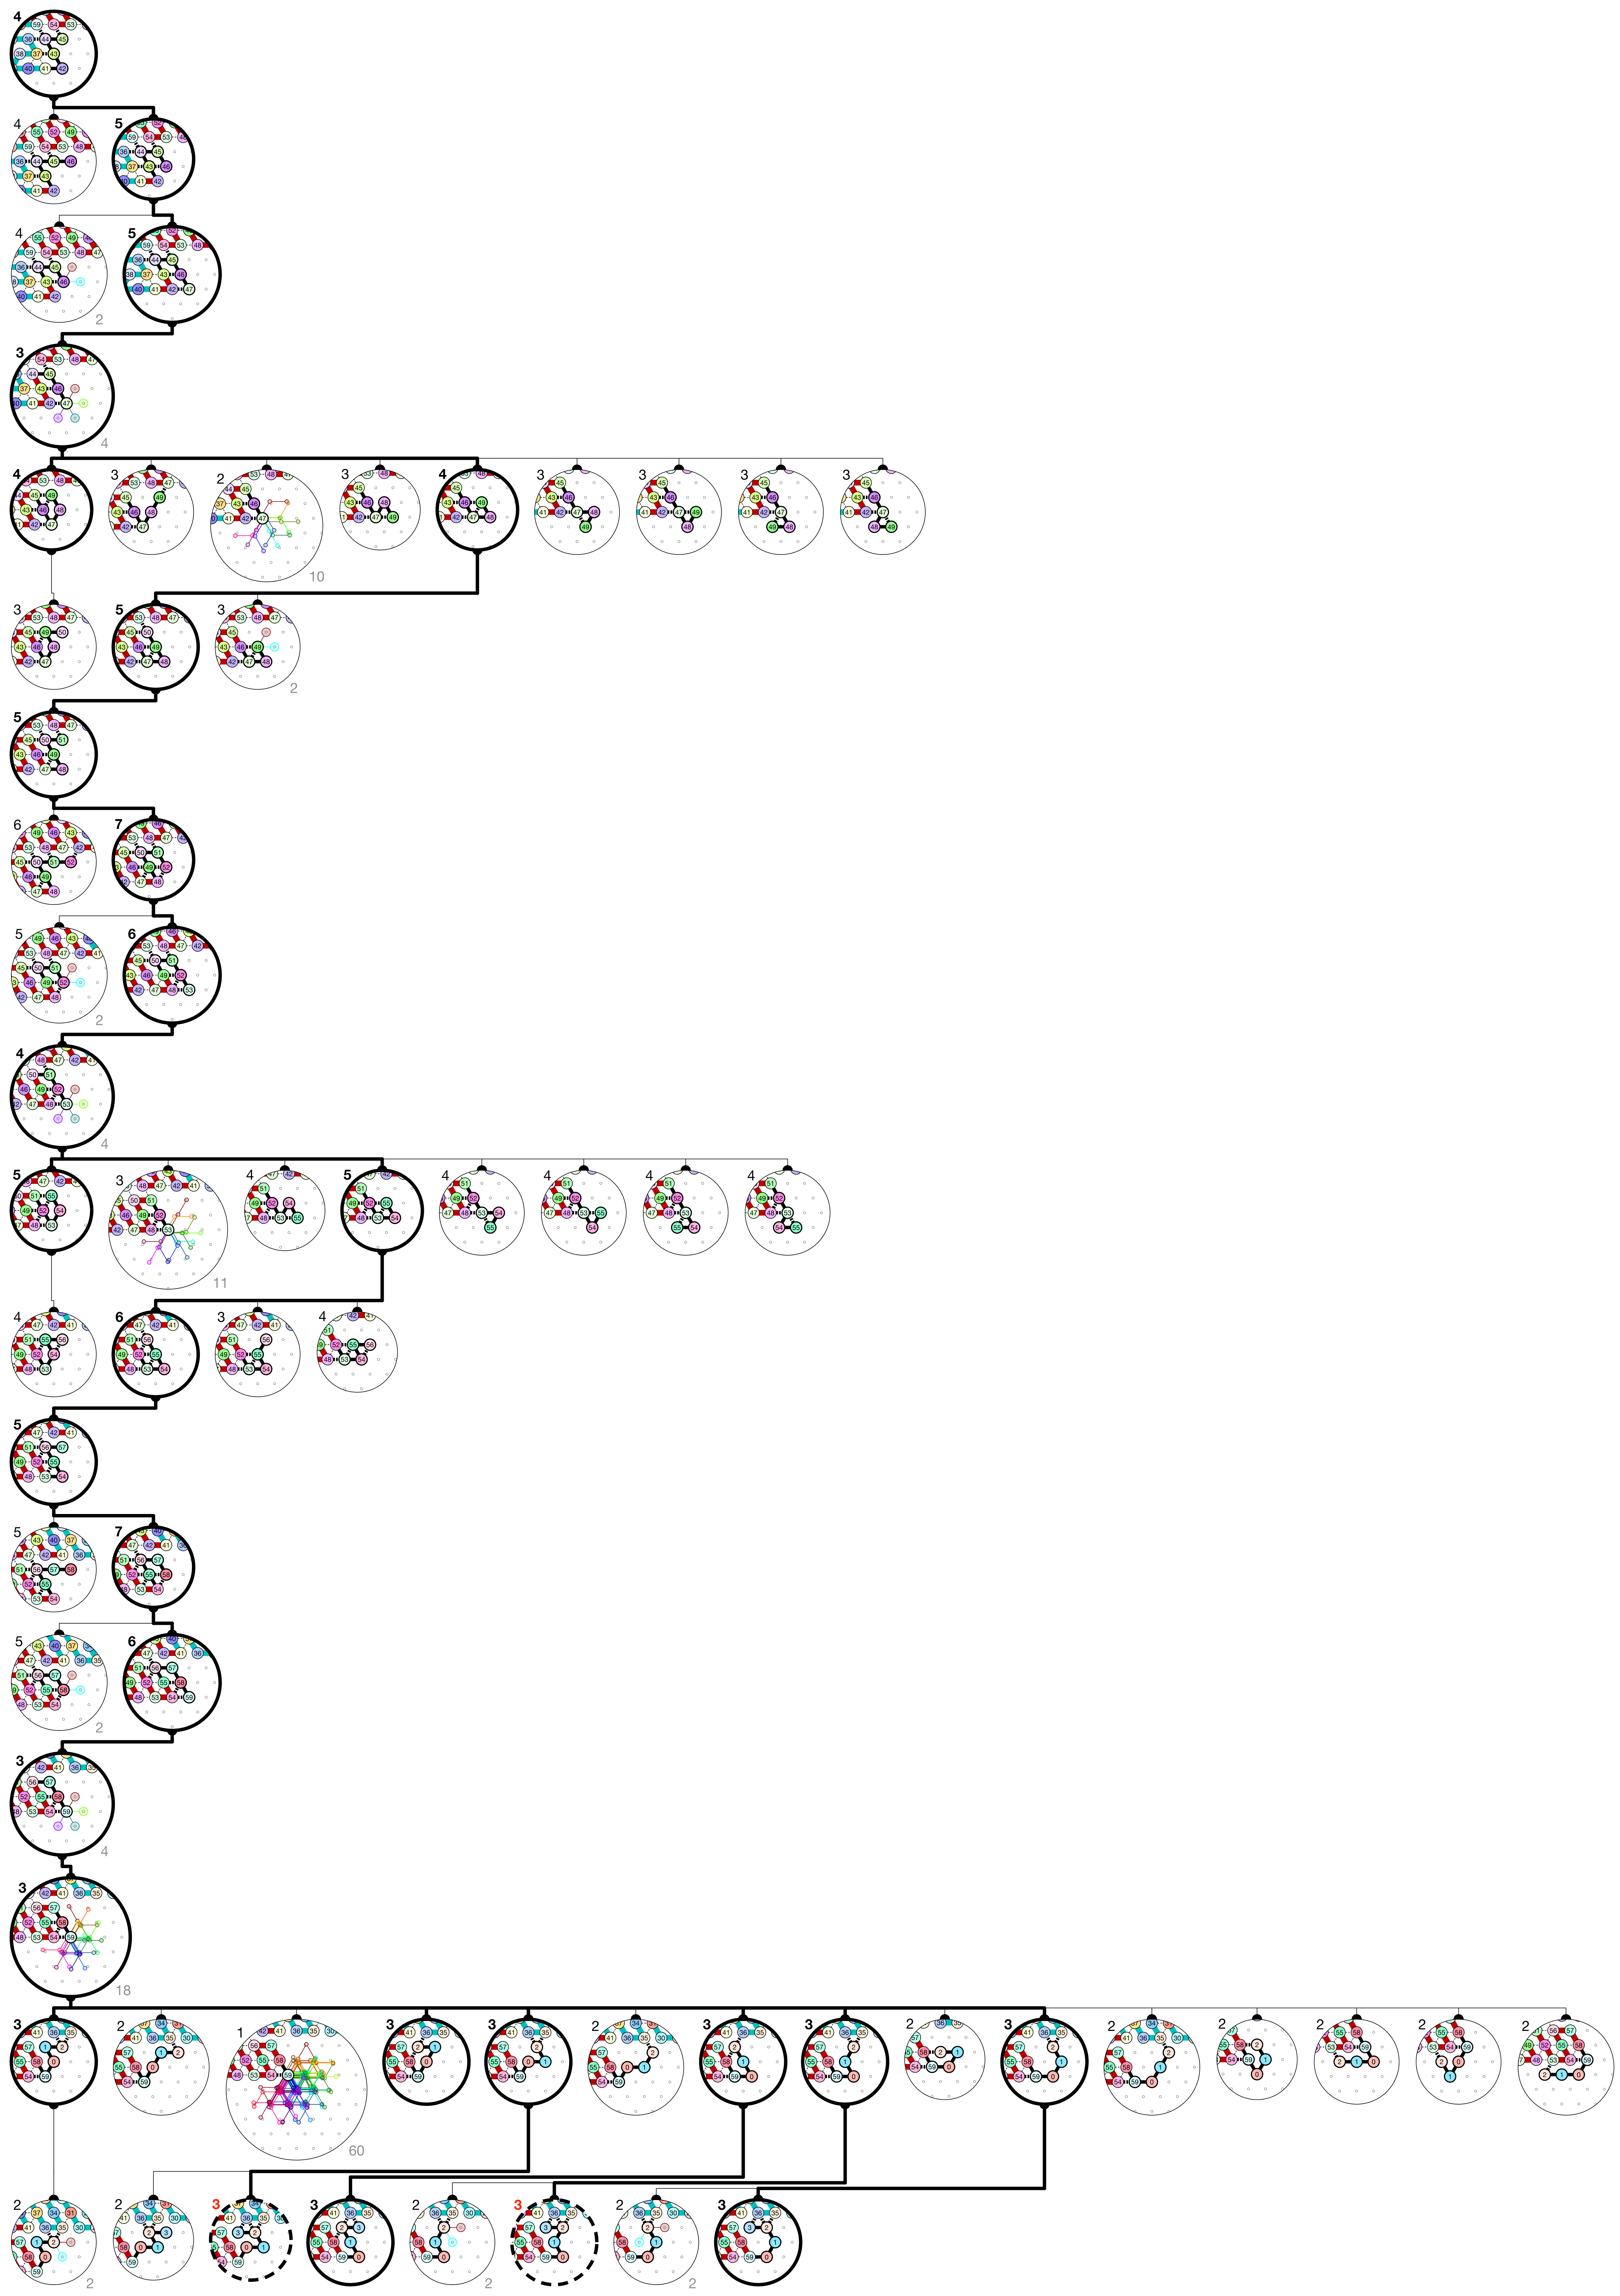

Supplement: s2 [file s2]
