# Supplementary figures and images for: Oritatami: A Computational Model for Molecular Co-Transcriptional Folding (part 2 of 2)
Source: MDPI journal article supplement (doi:10.3390/ijms20092259), 2019-05-07

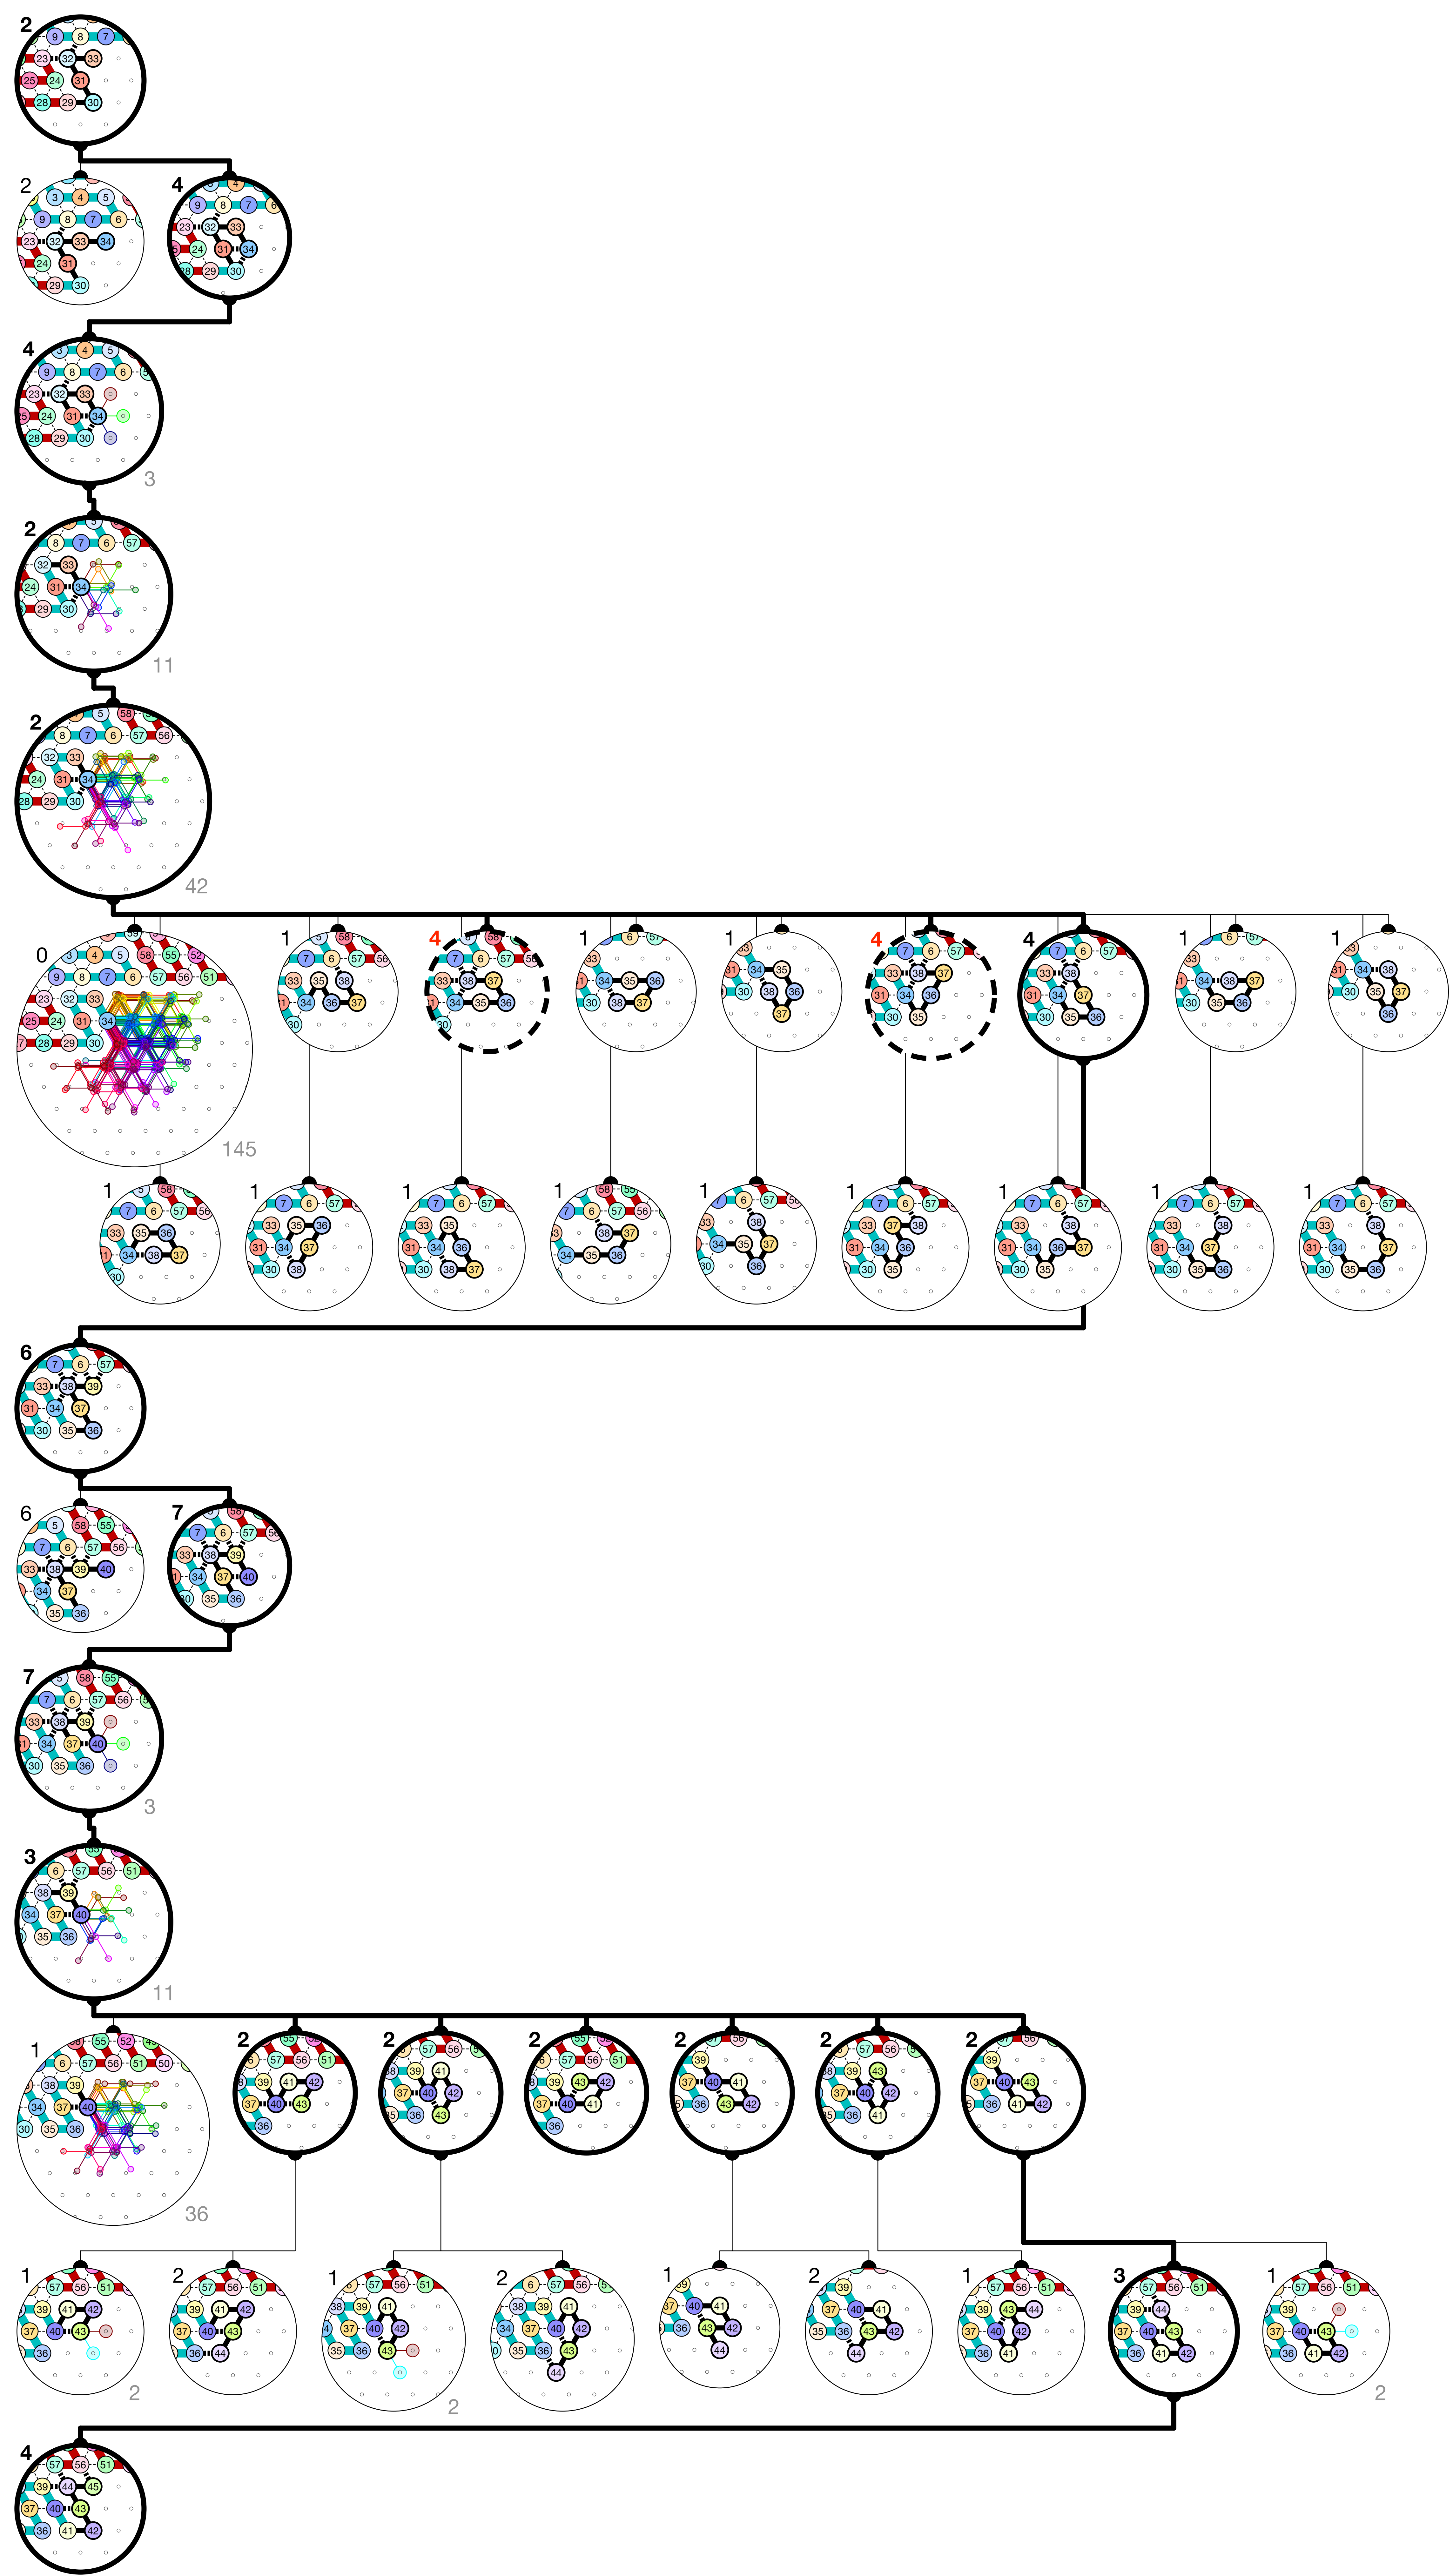

Supplement: s2 [file s2]

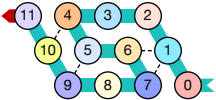

Supplement: s2 [file s2]

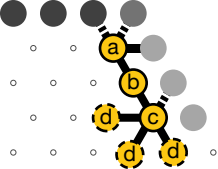

Supplement: s2 [file s2]

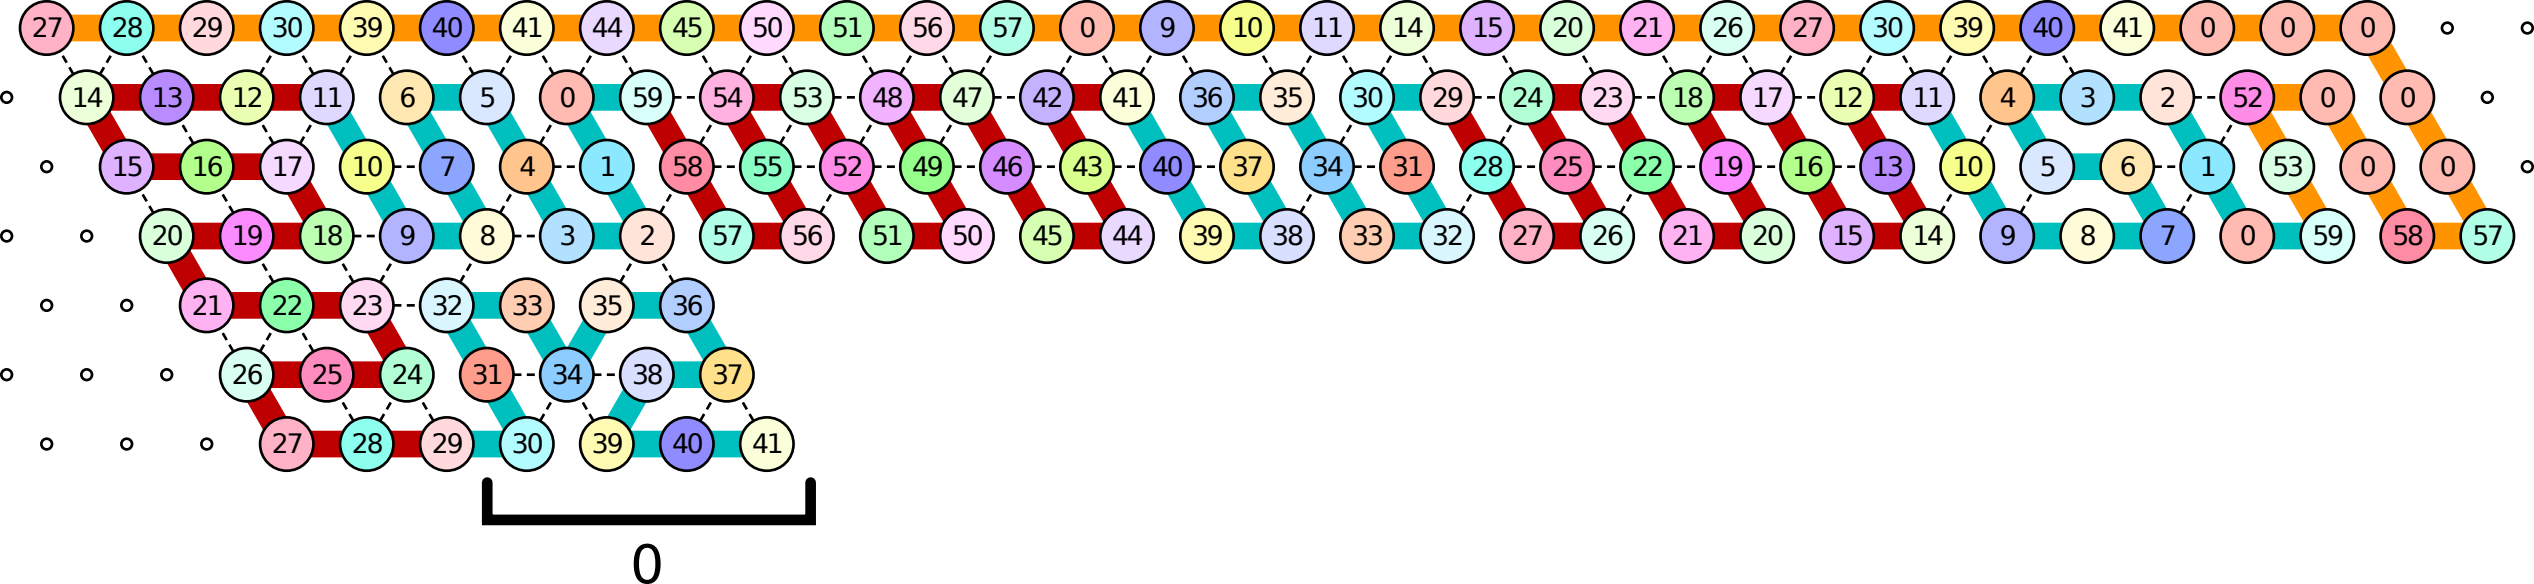

Supplement: s2 [file s2]

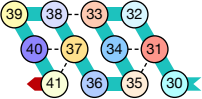

Supplement: s2 [file s2]

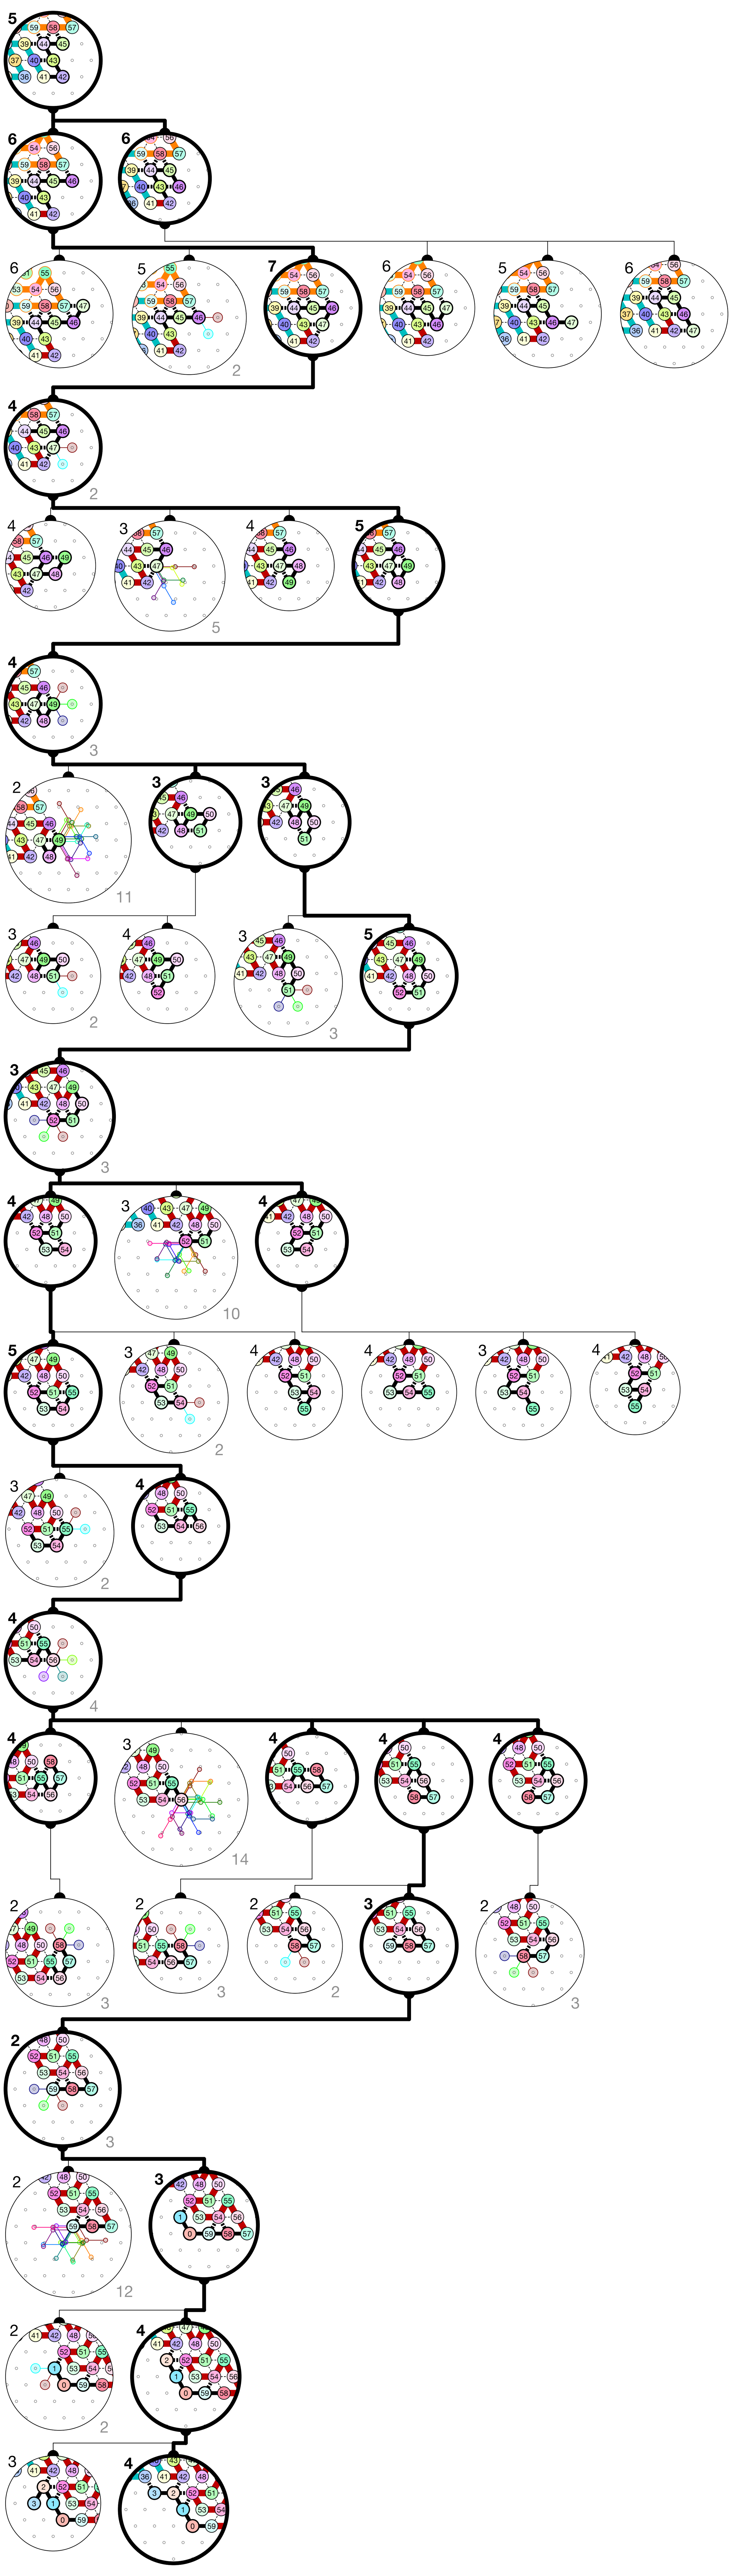

Supplement: s2 [file s2]

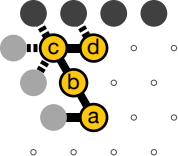

Supplement: s2 [file s2]

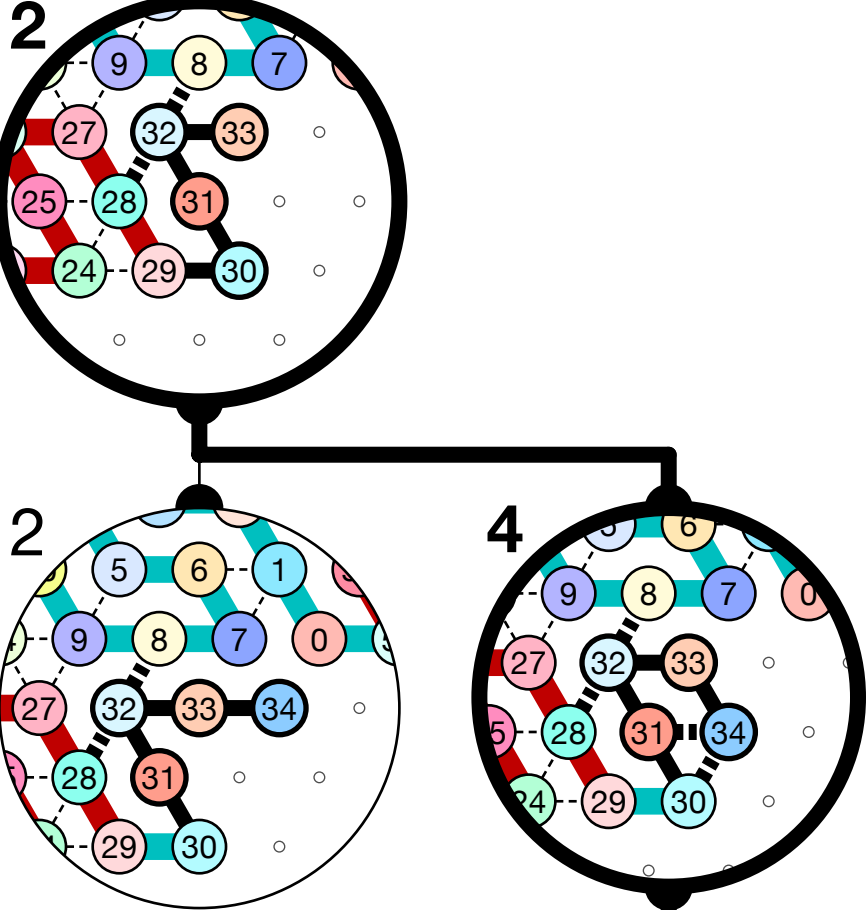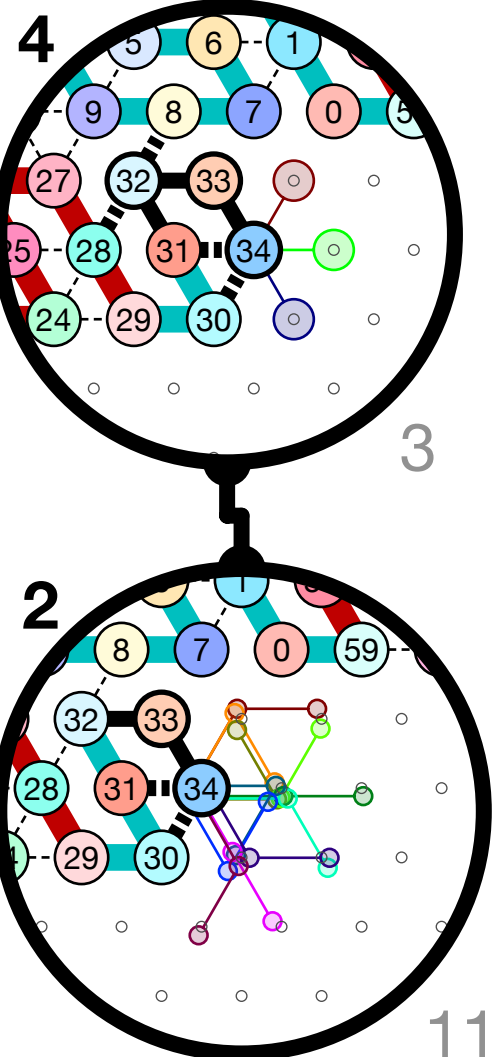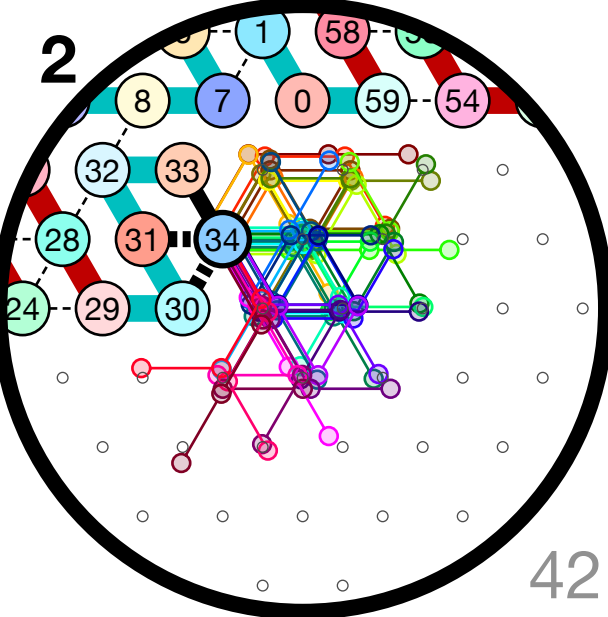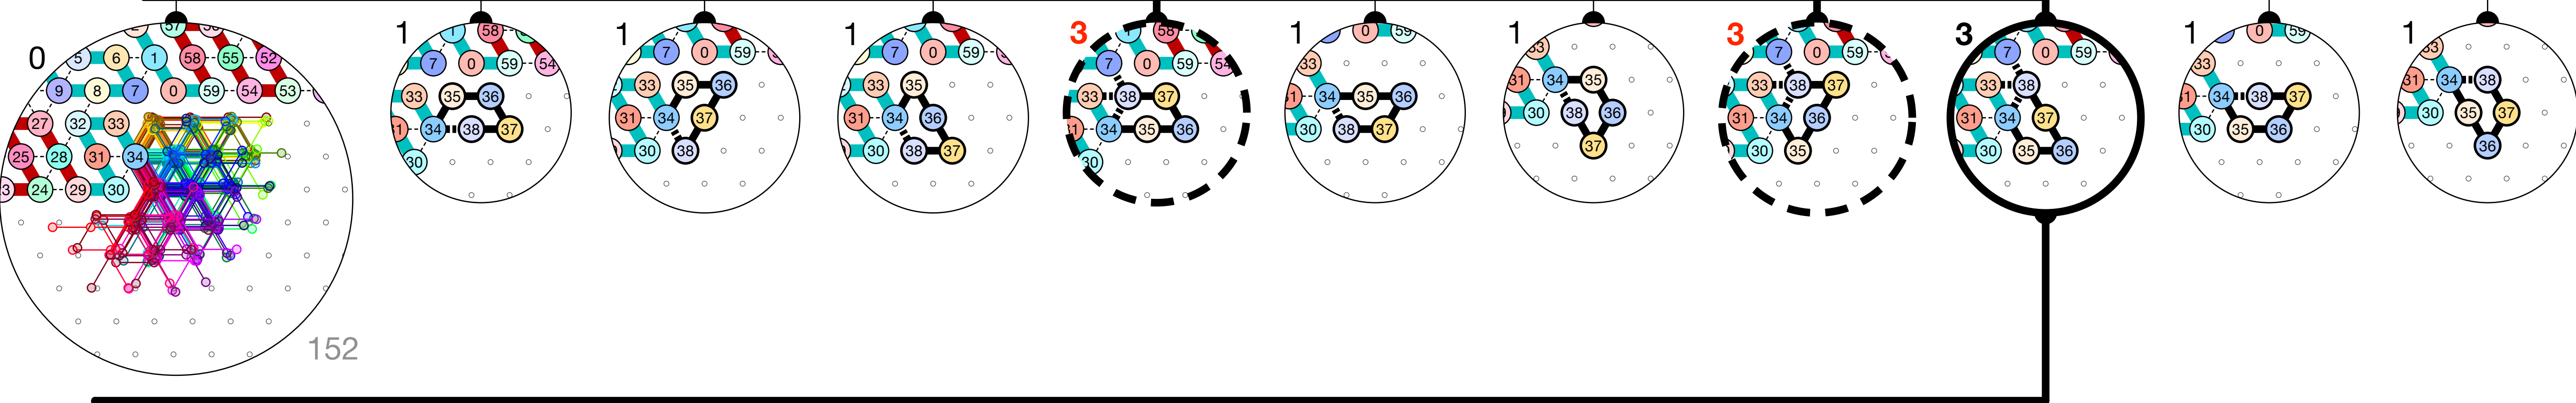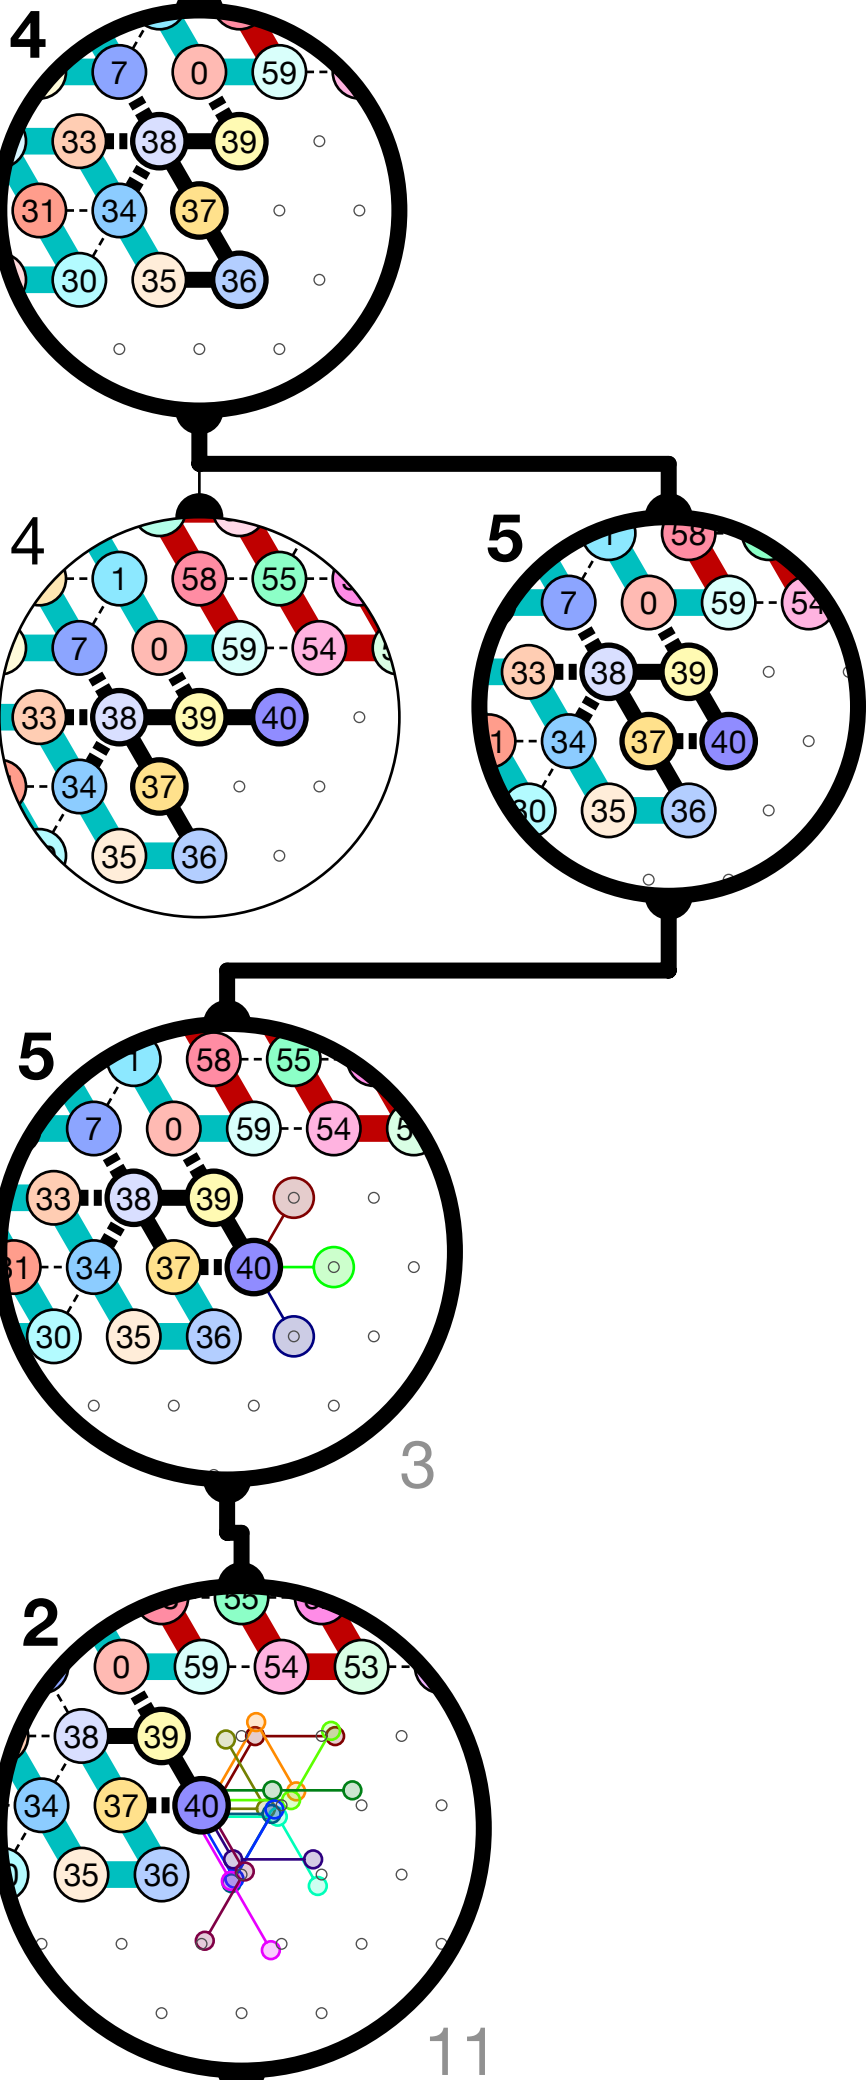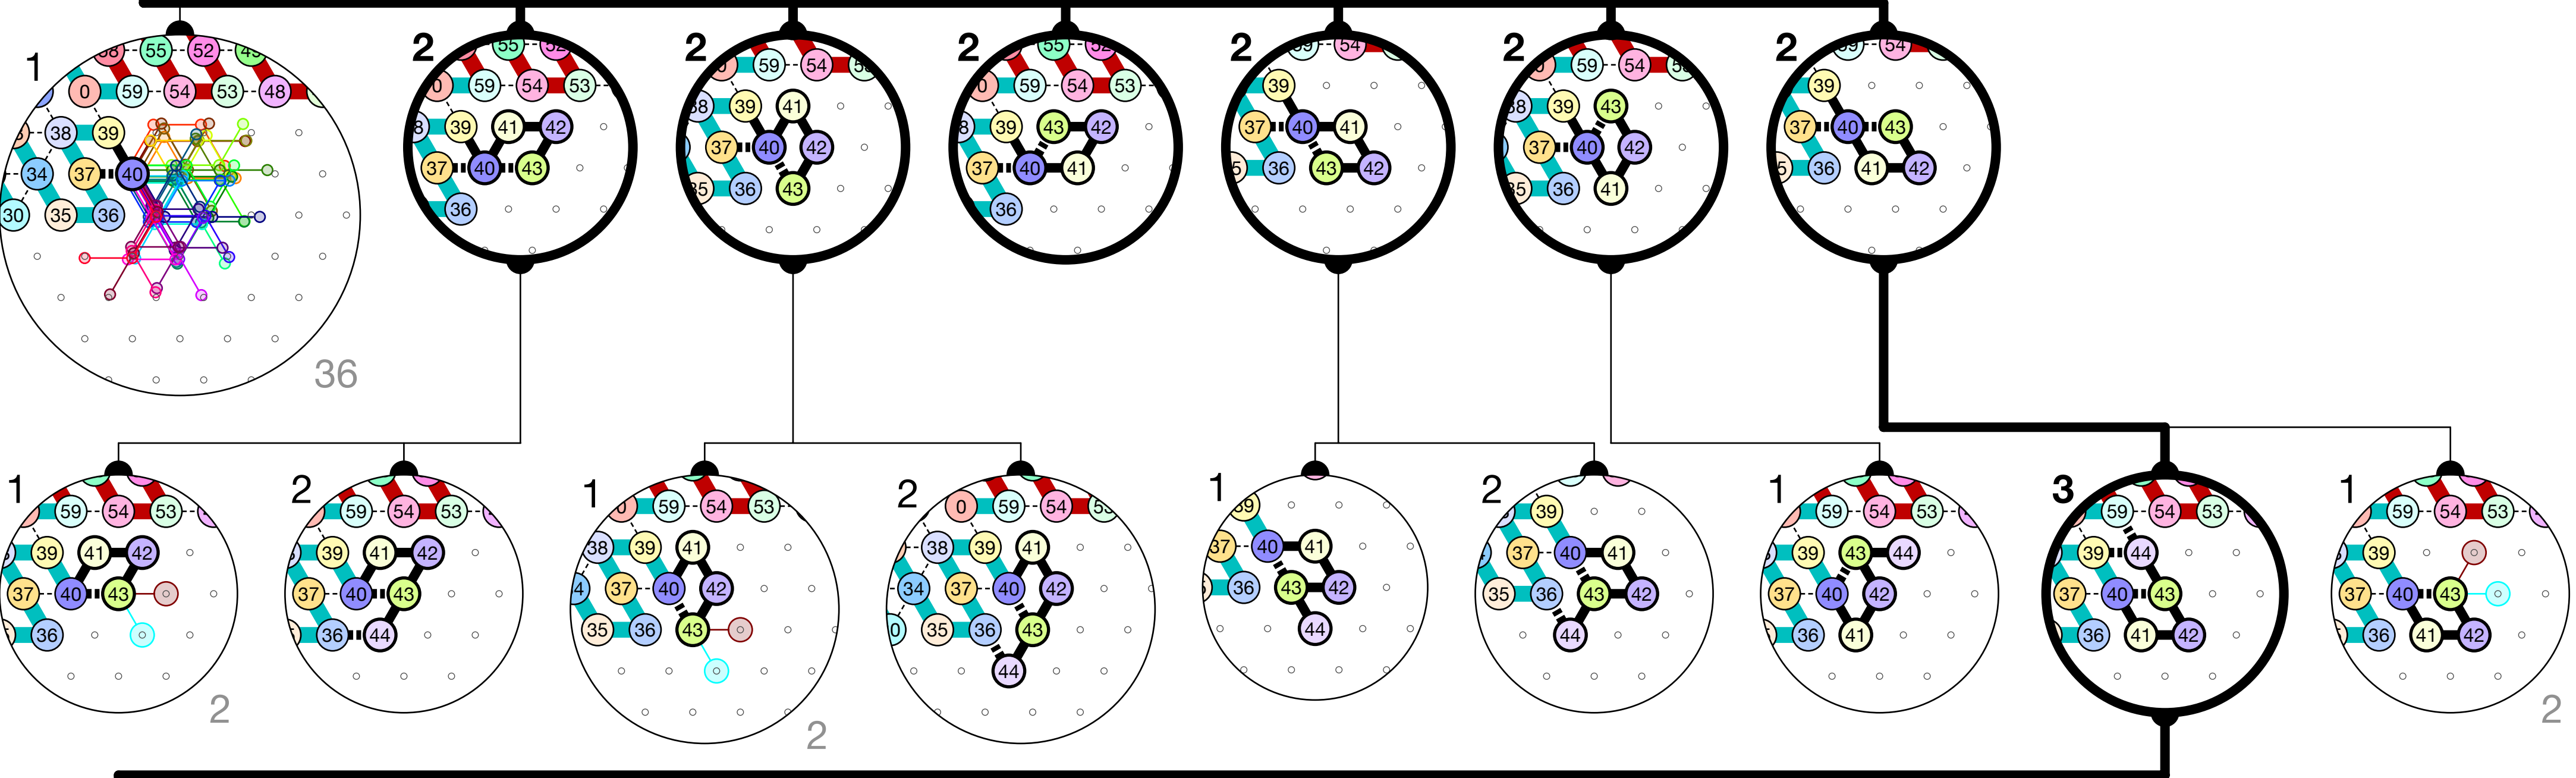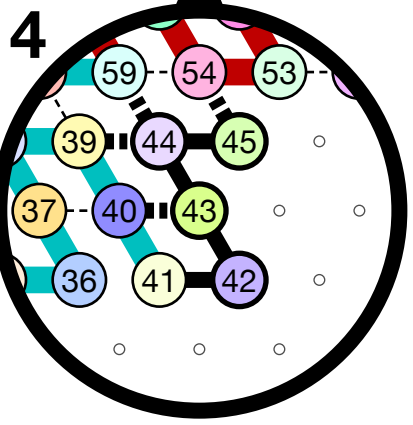

Supplement: s2 [file s2]

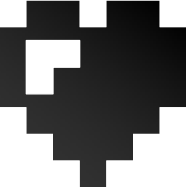

Supplement: s2 [file s2]

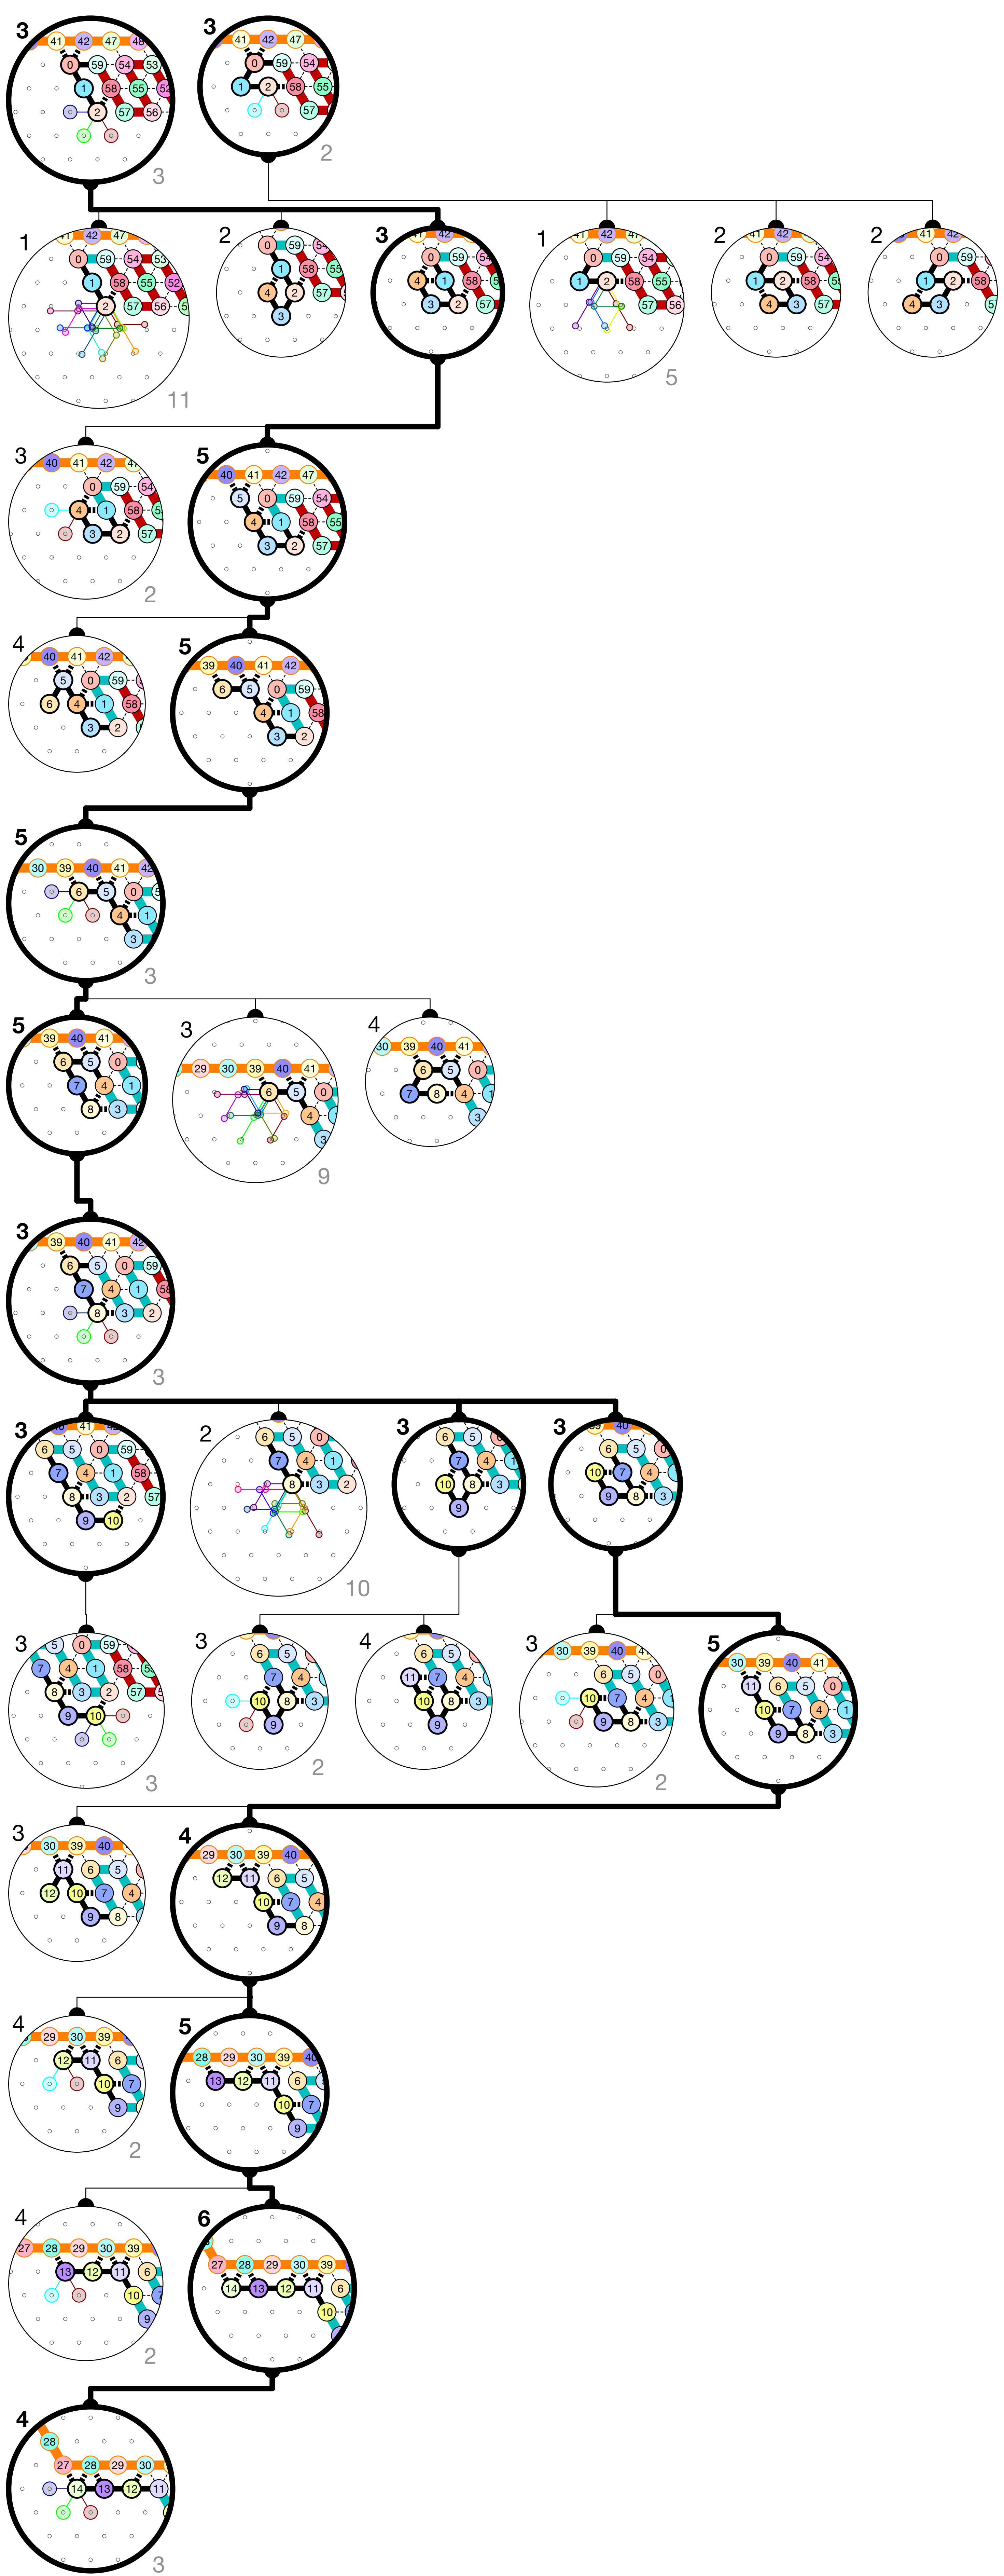

Supplement: s2 [file s2]

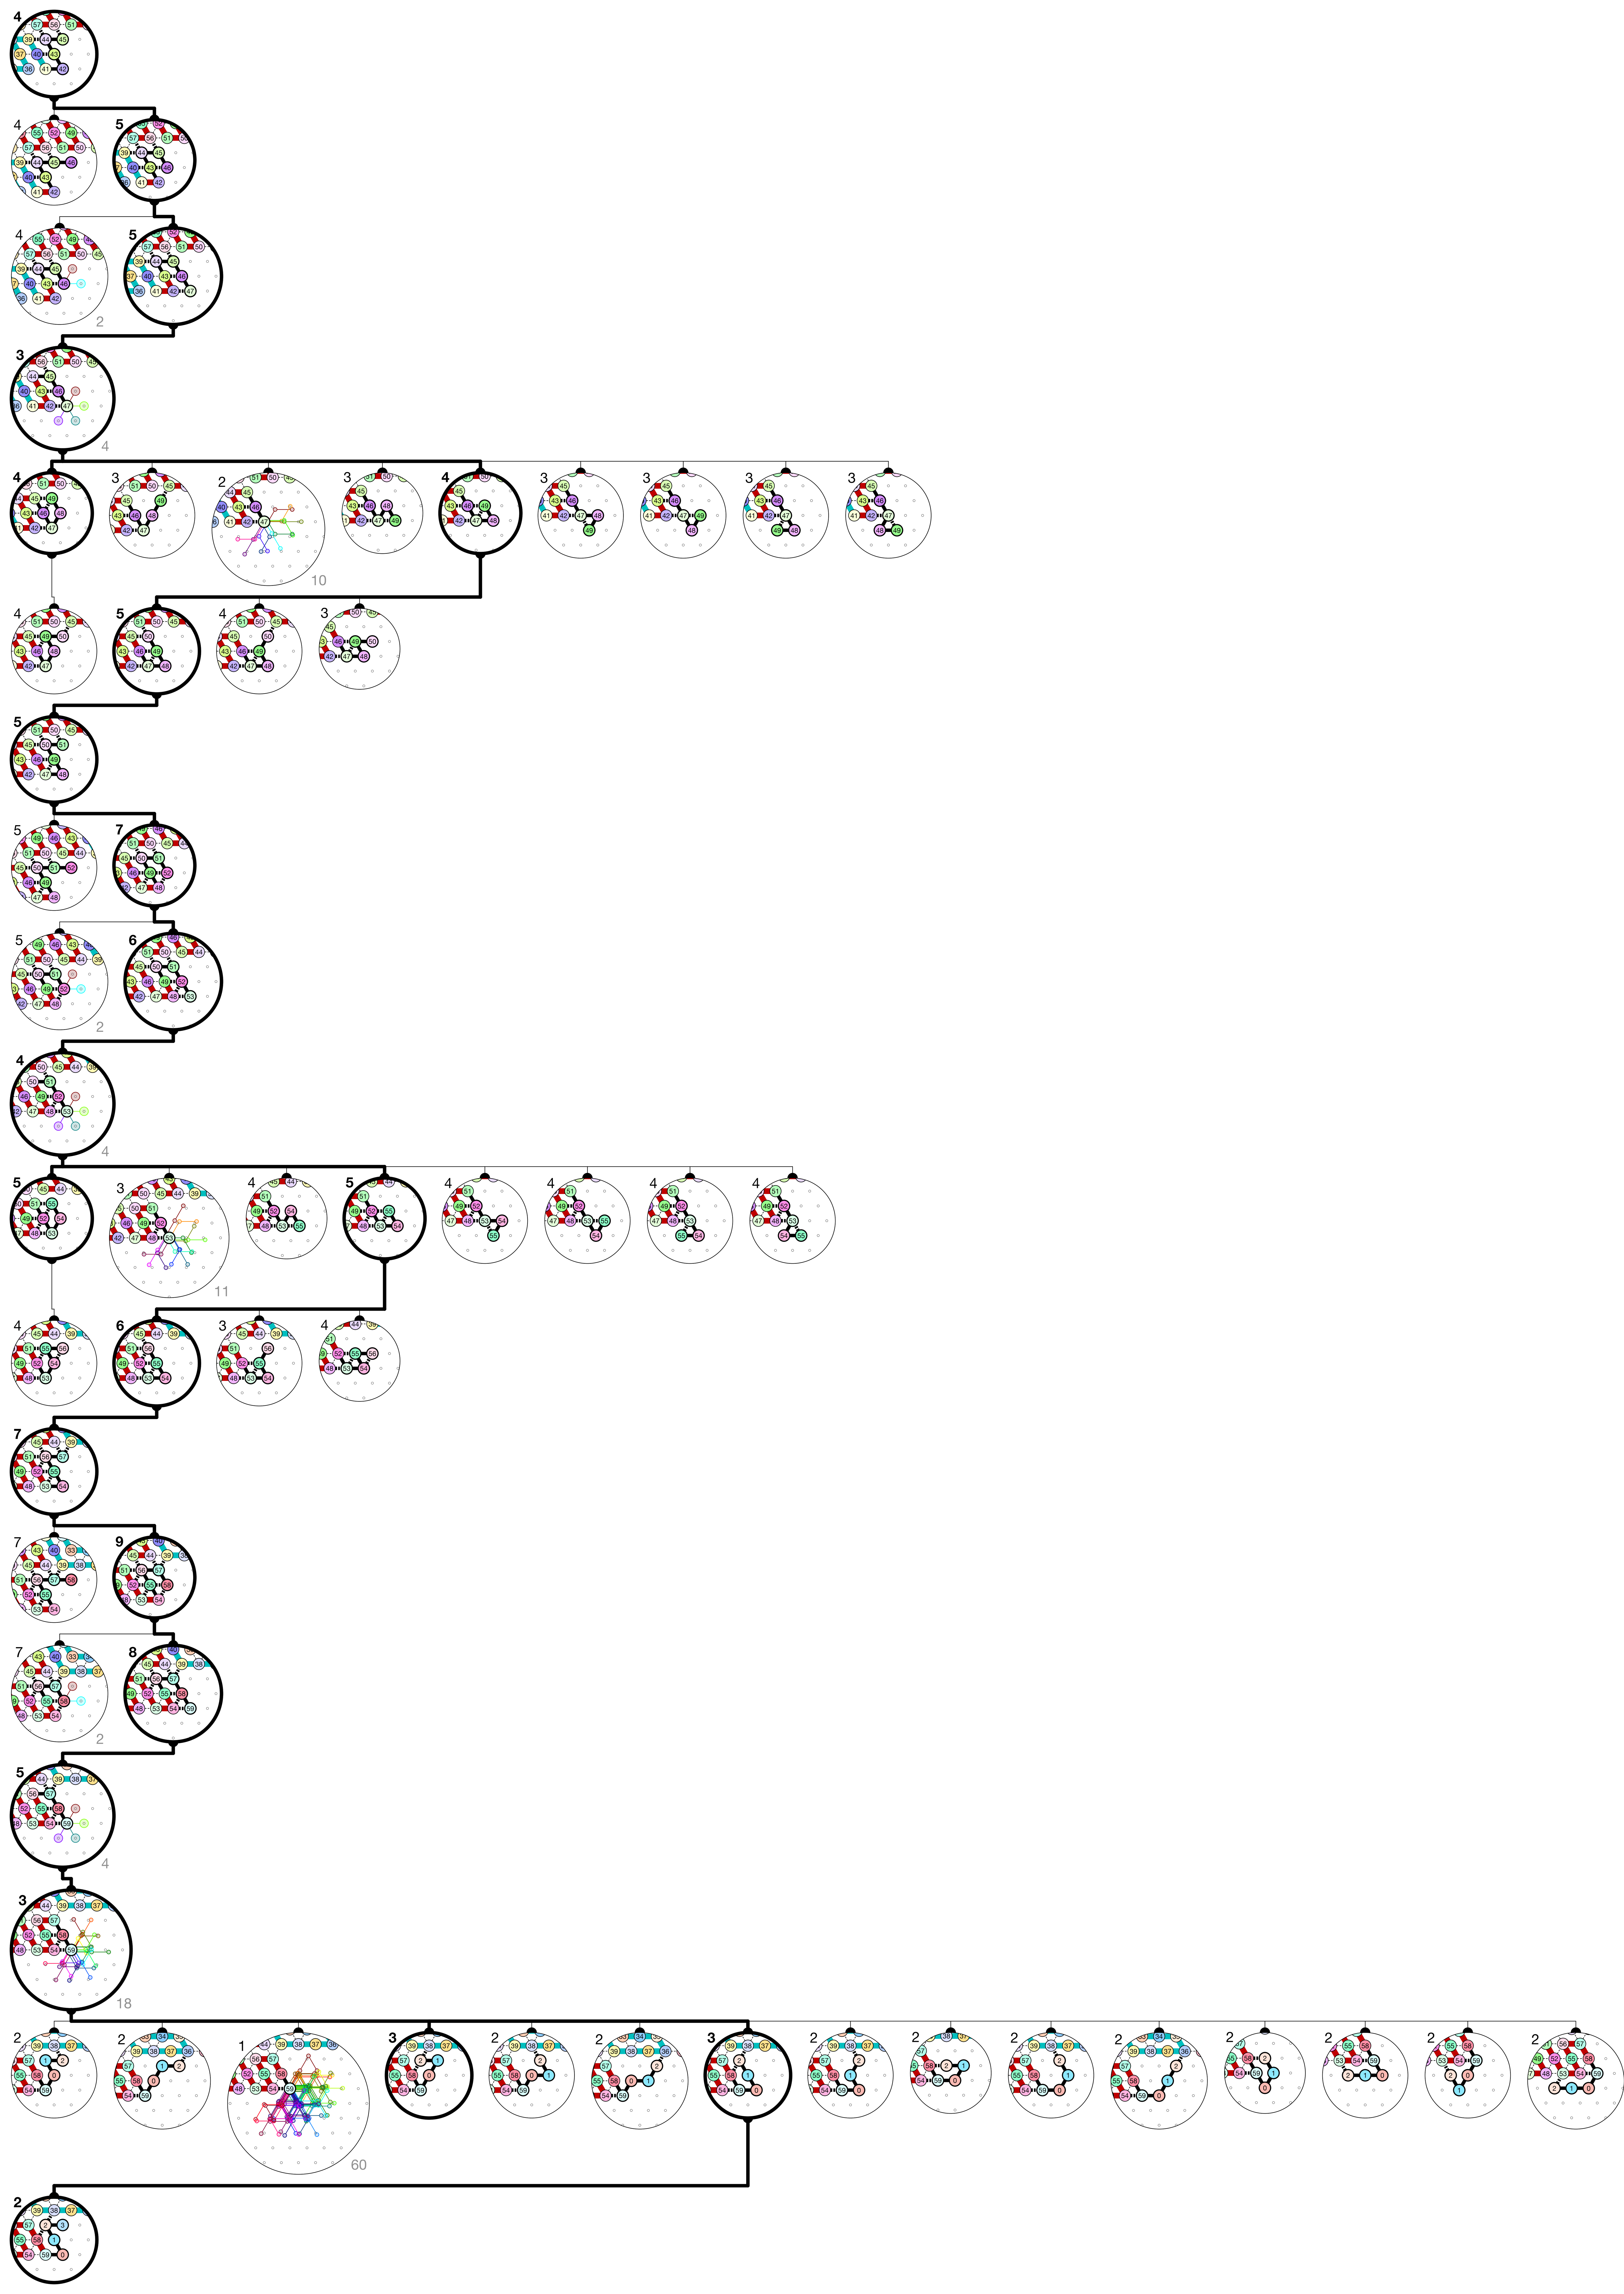

Supplement: s2 [file s2]

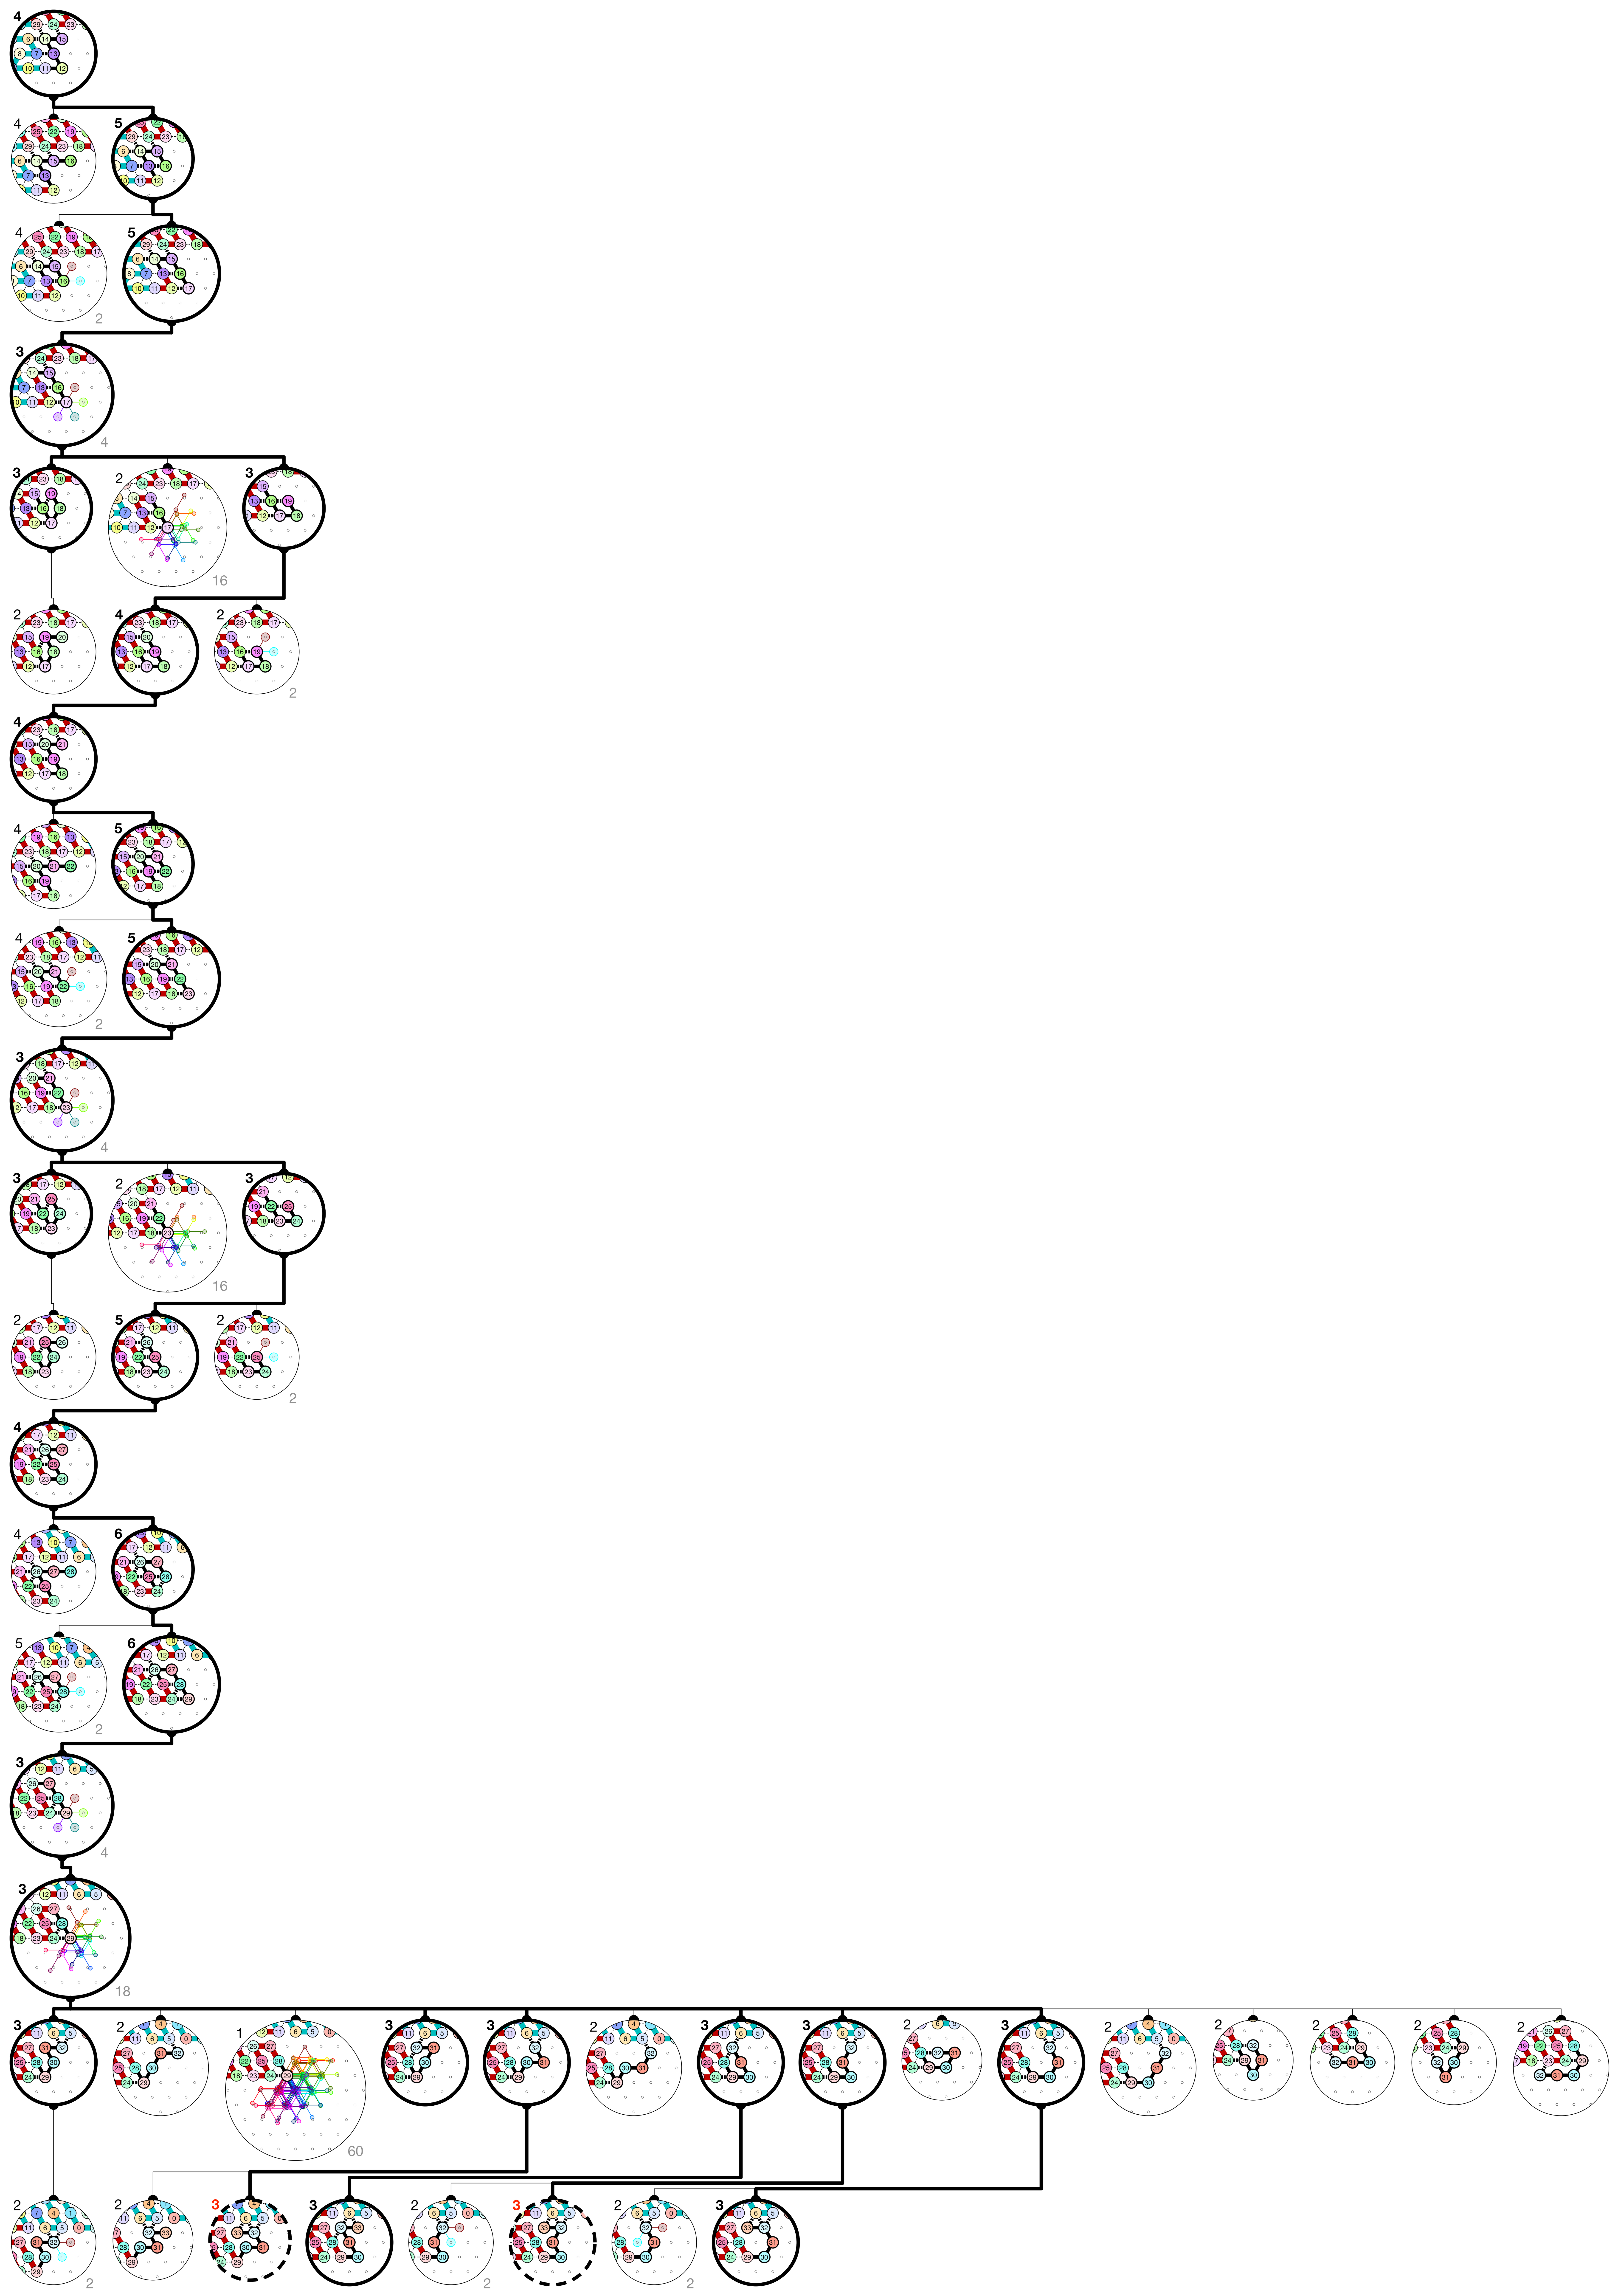

Supplement: s2 [file s2]

43

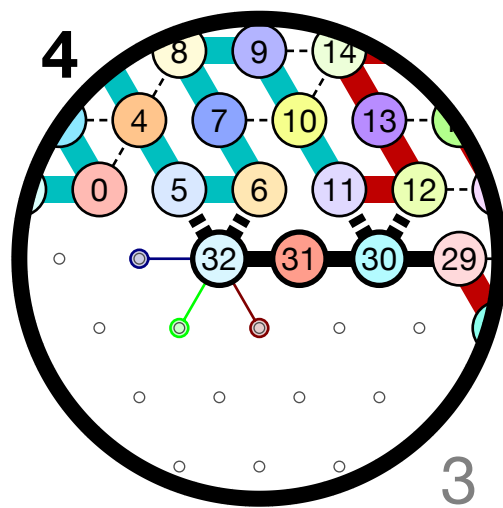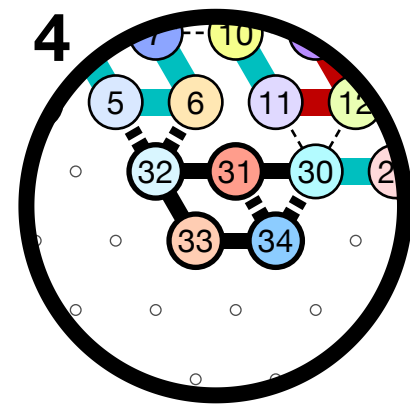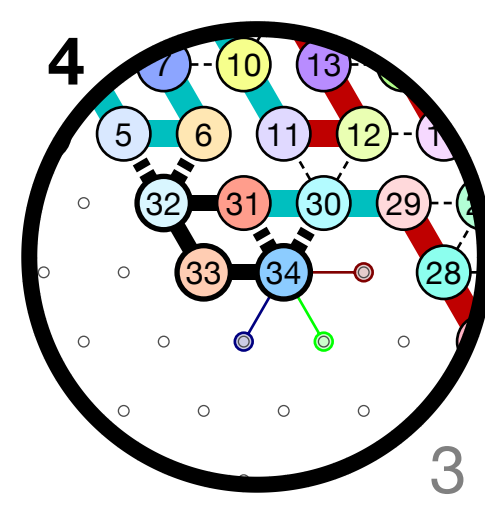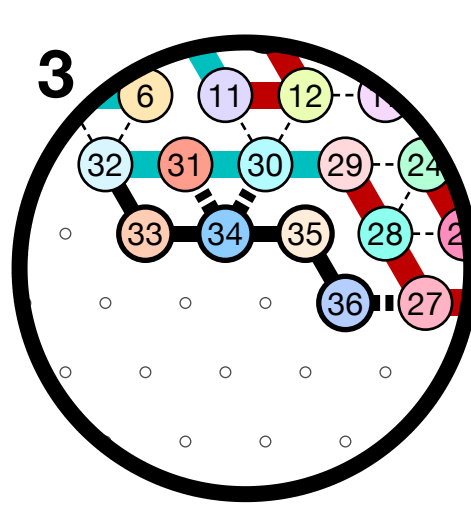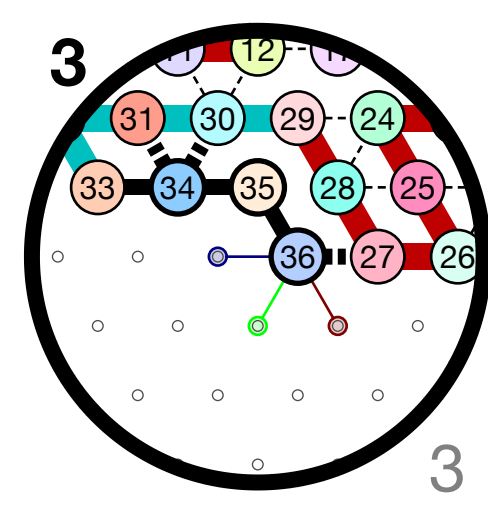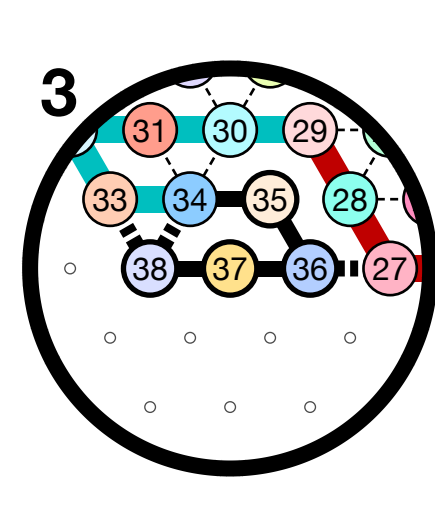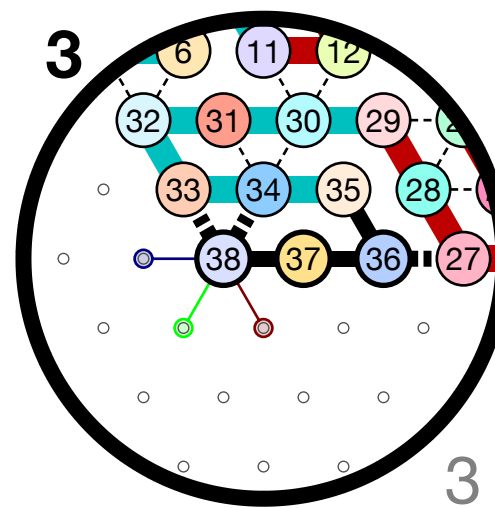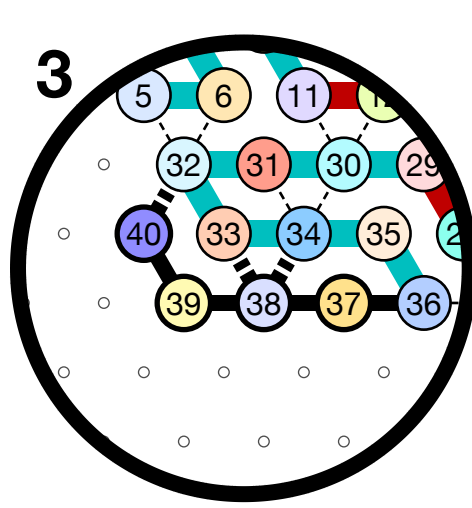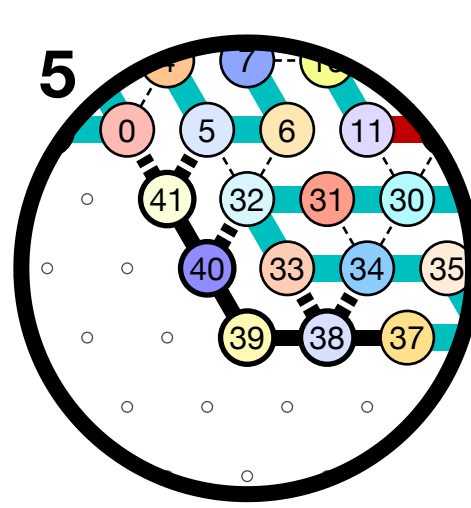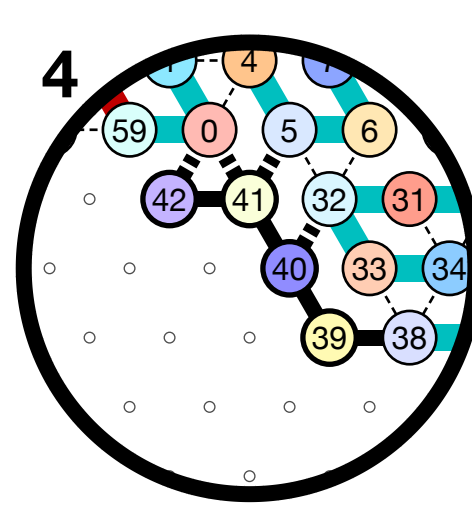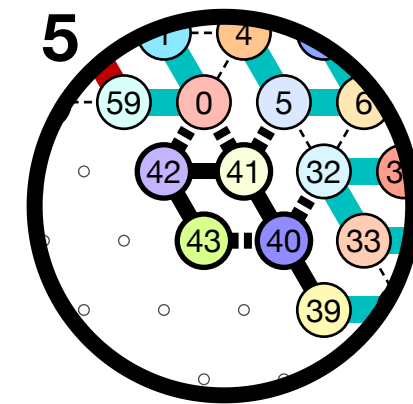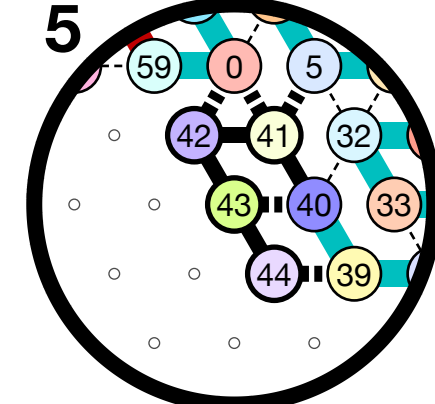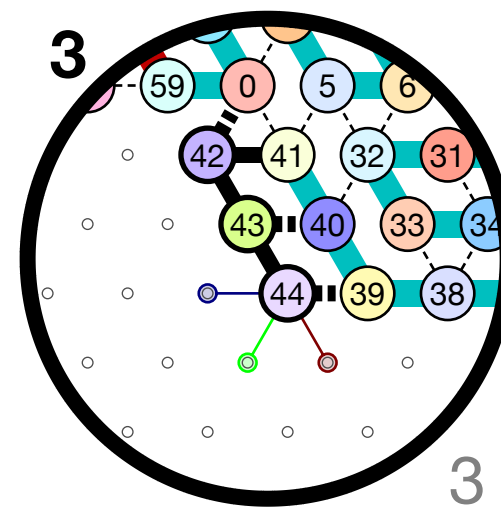

3

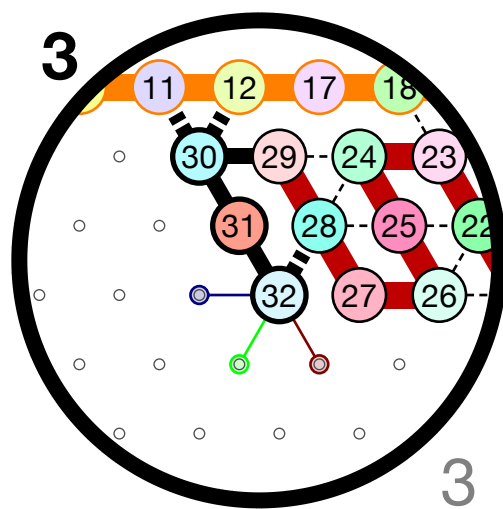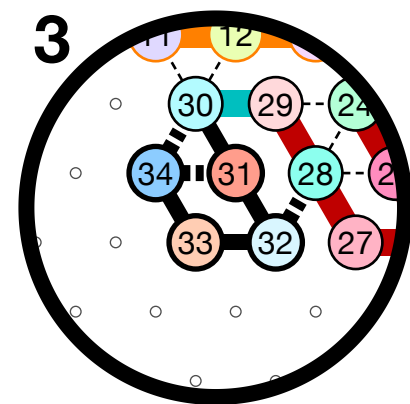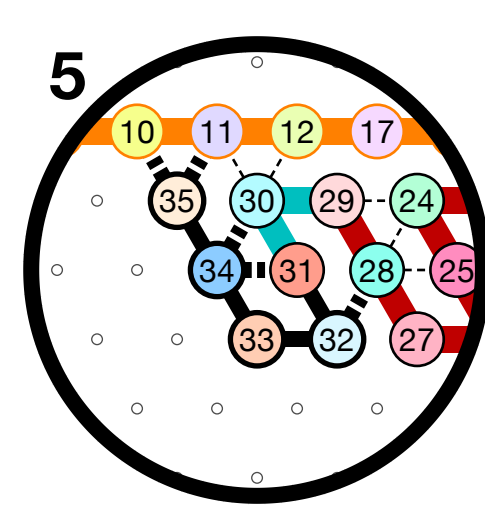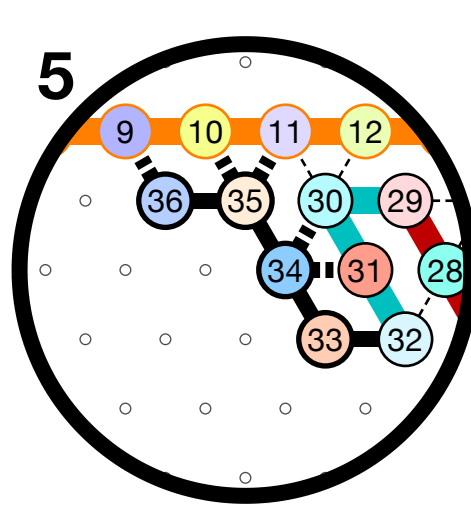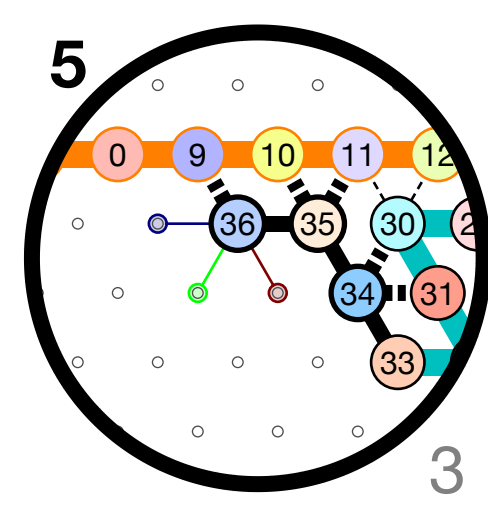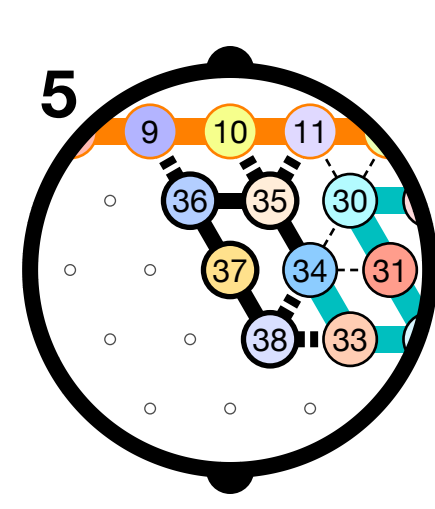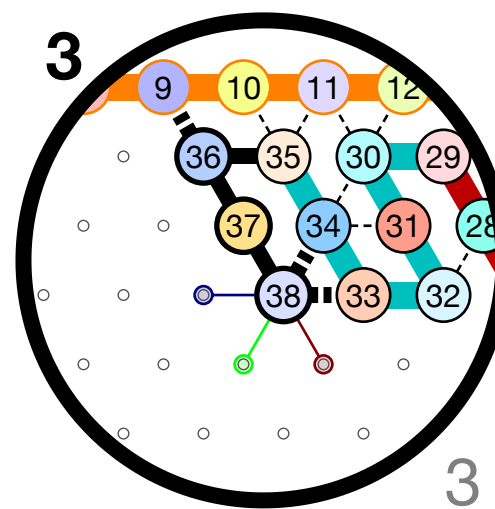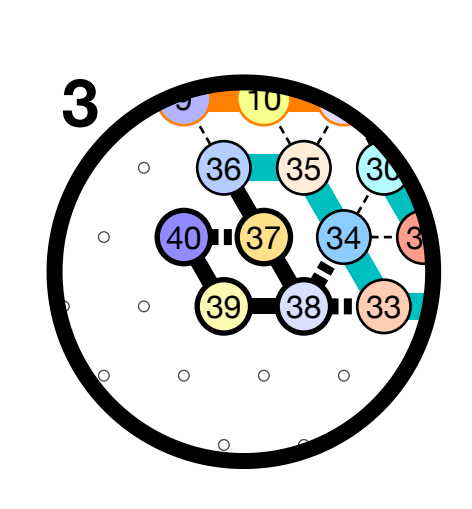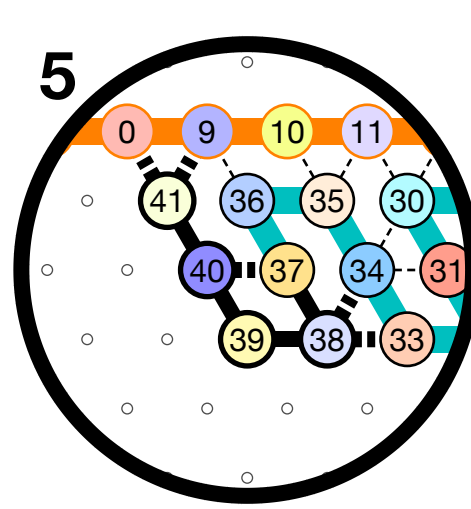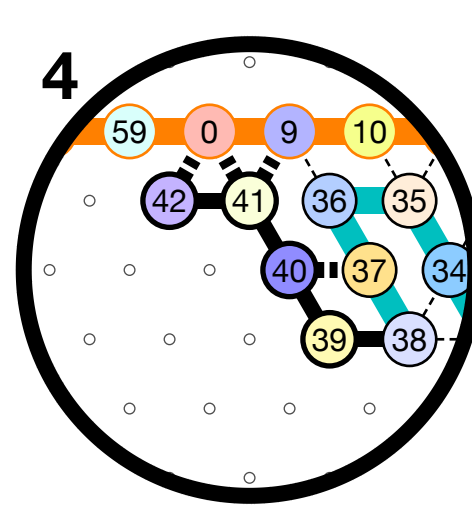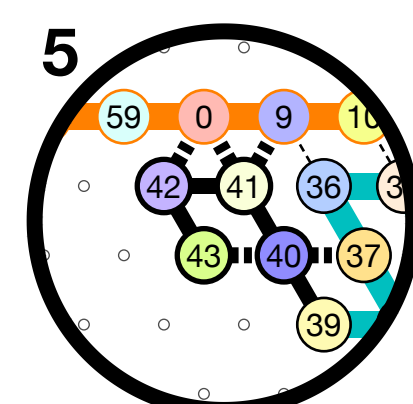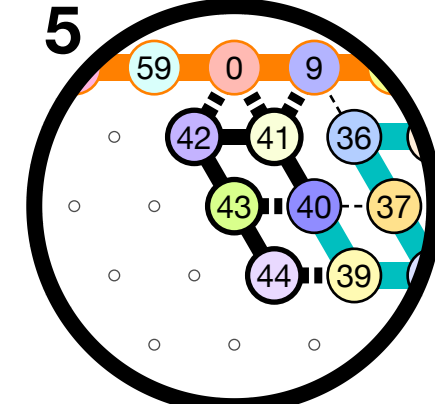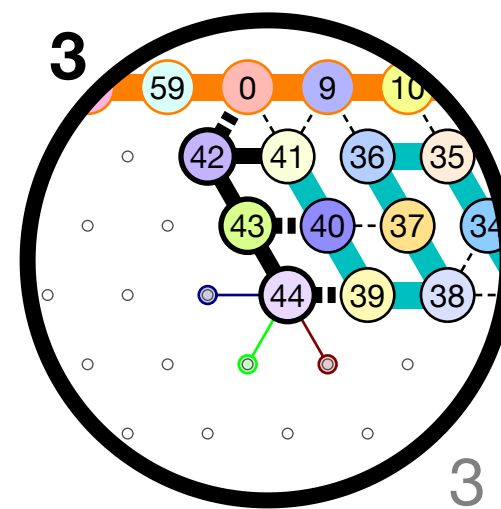

23

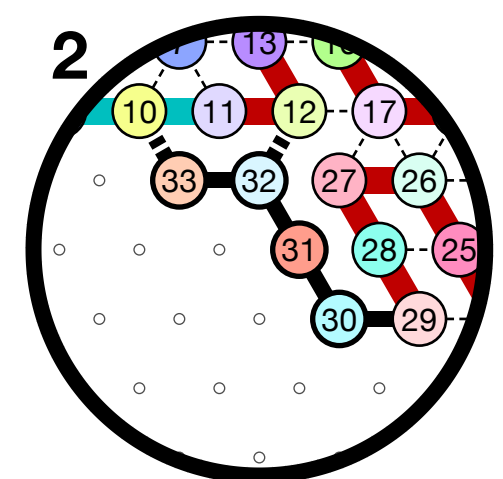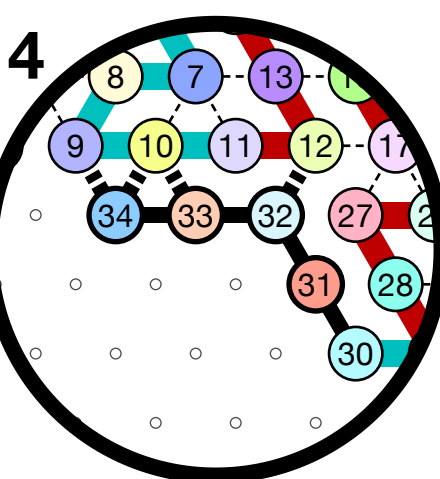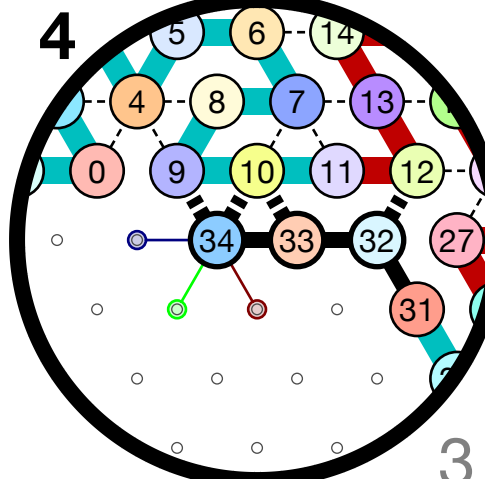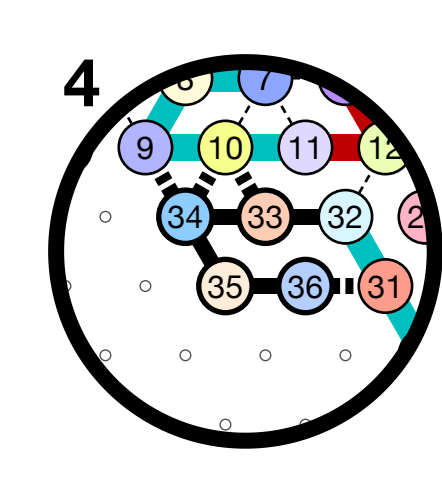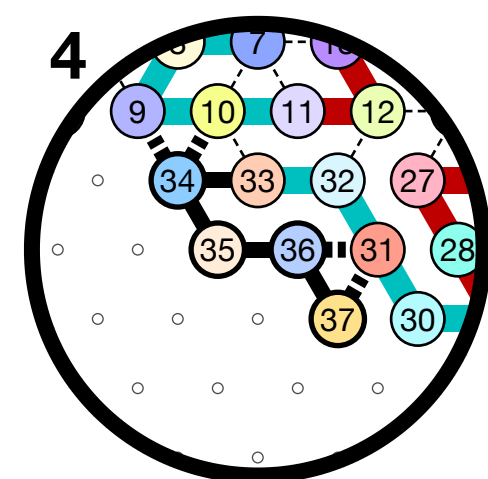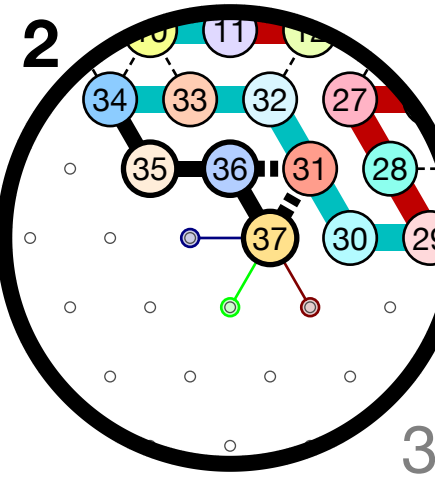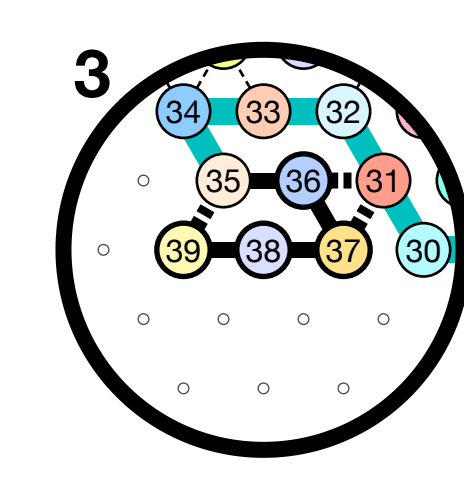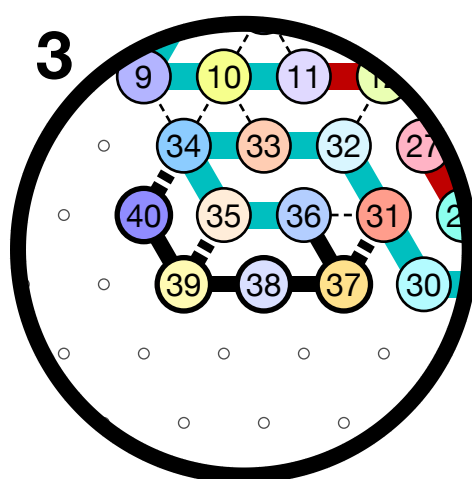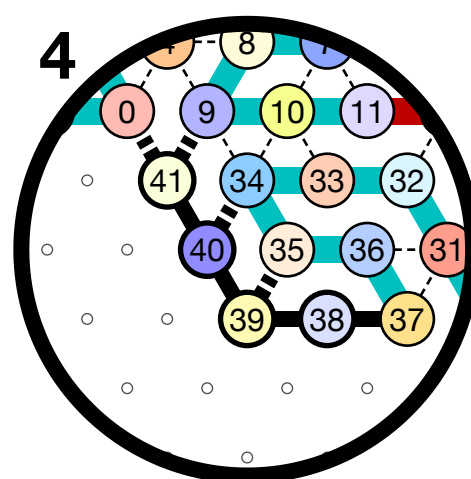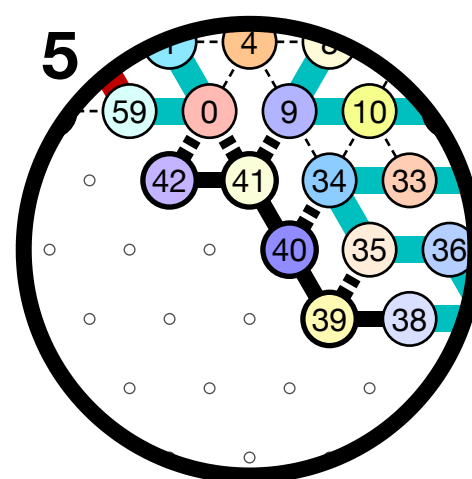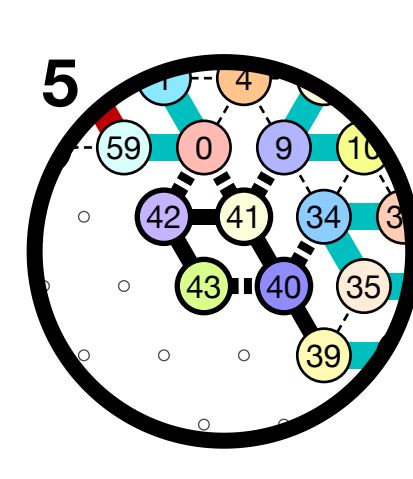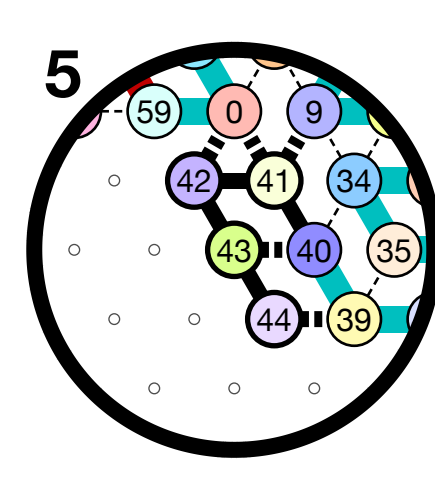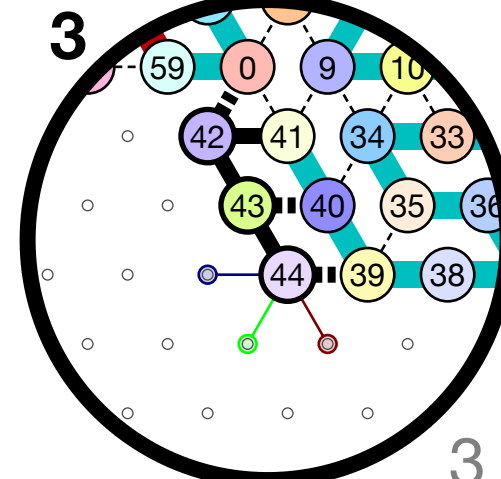

Supplement: s2 [file s2]

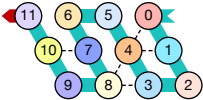

Supplement: s2 [file s2]

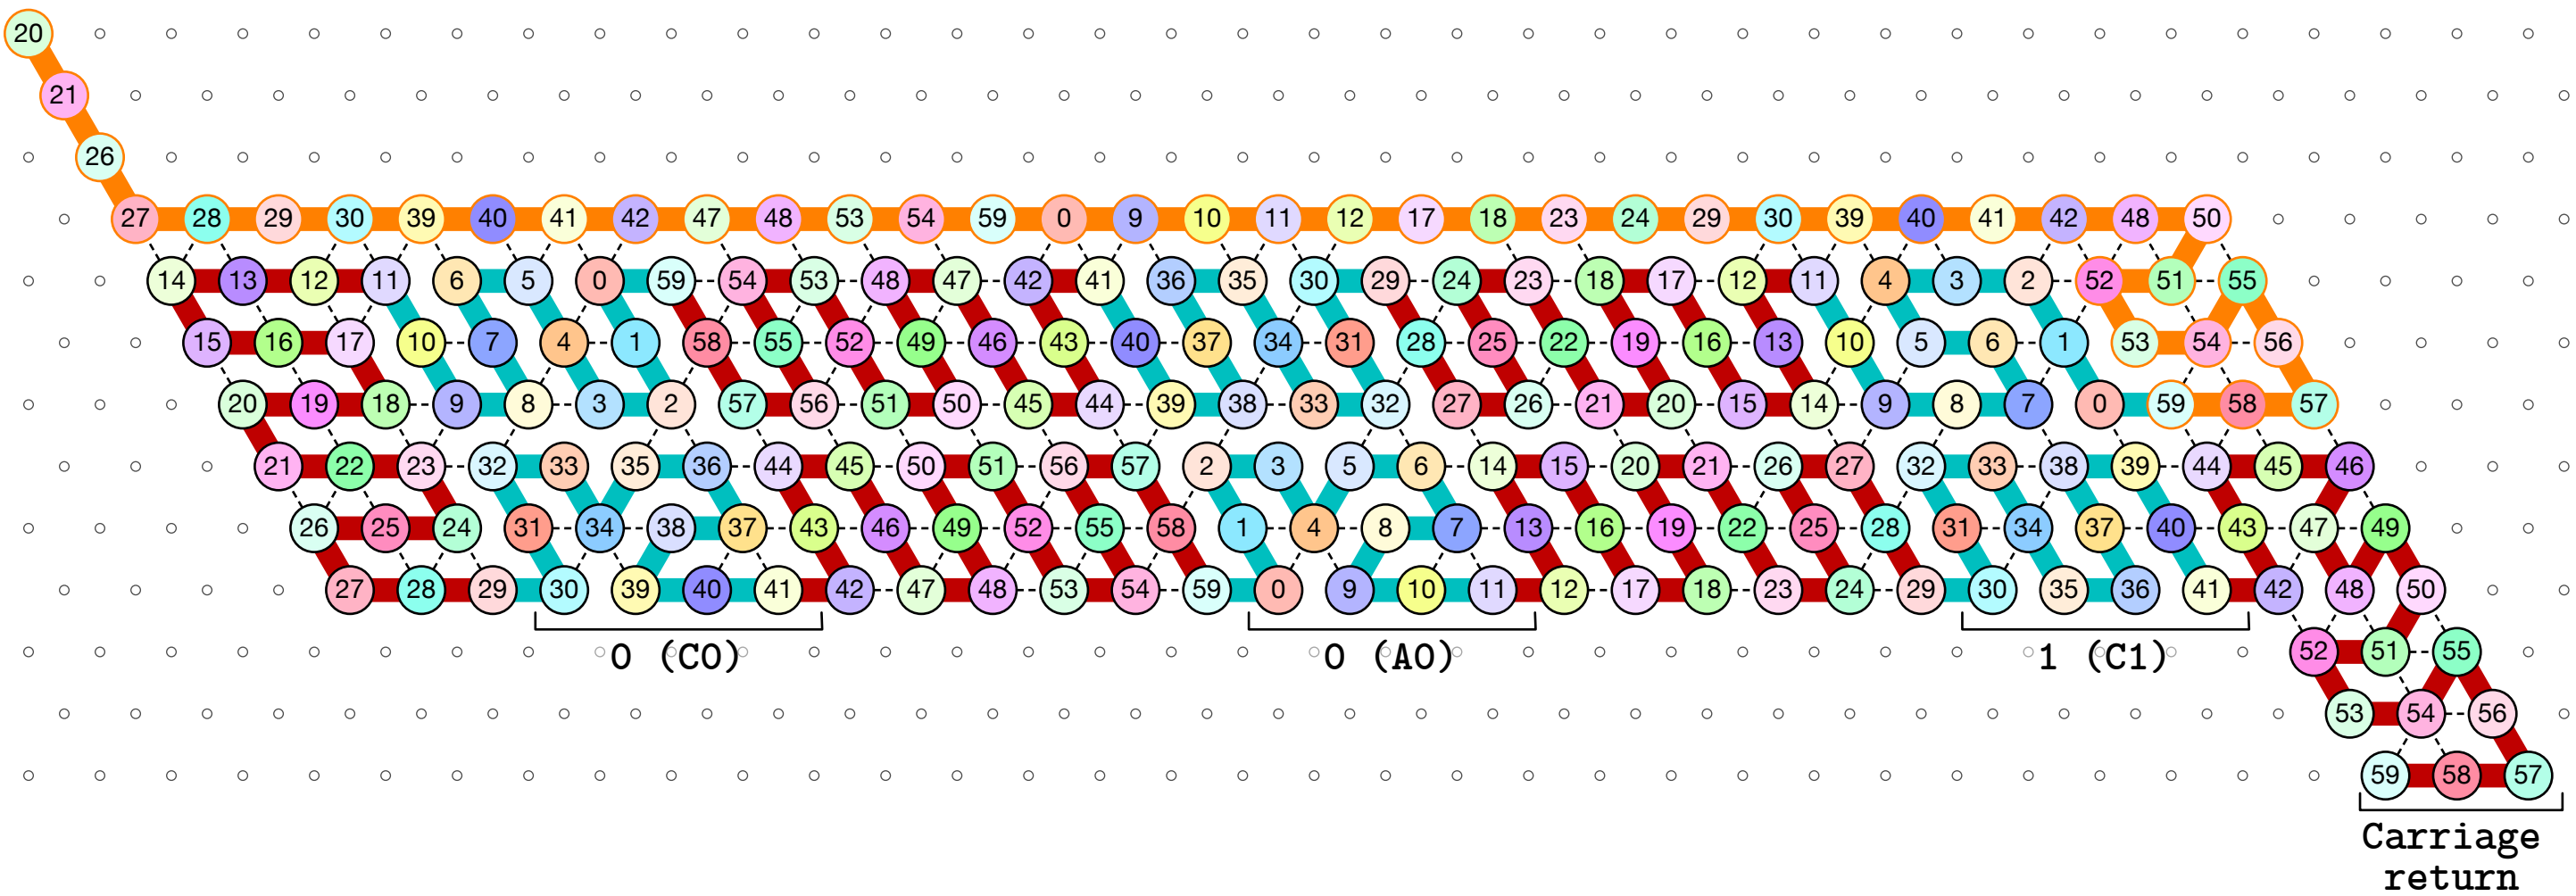

Supplement: s2 [file s2]

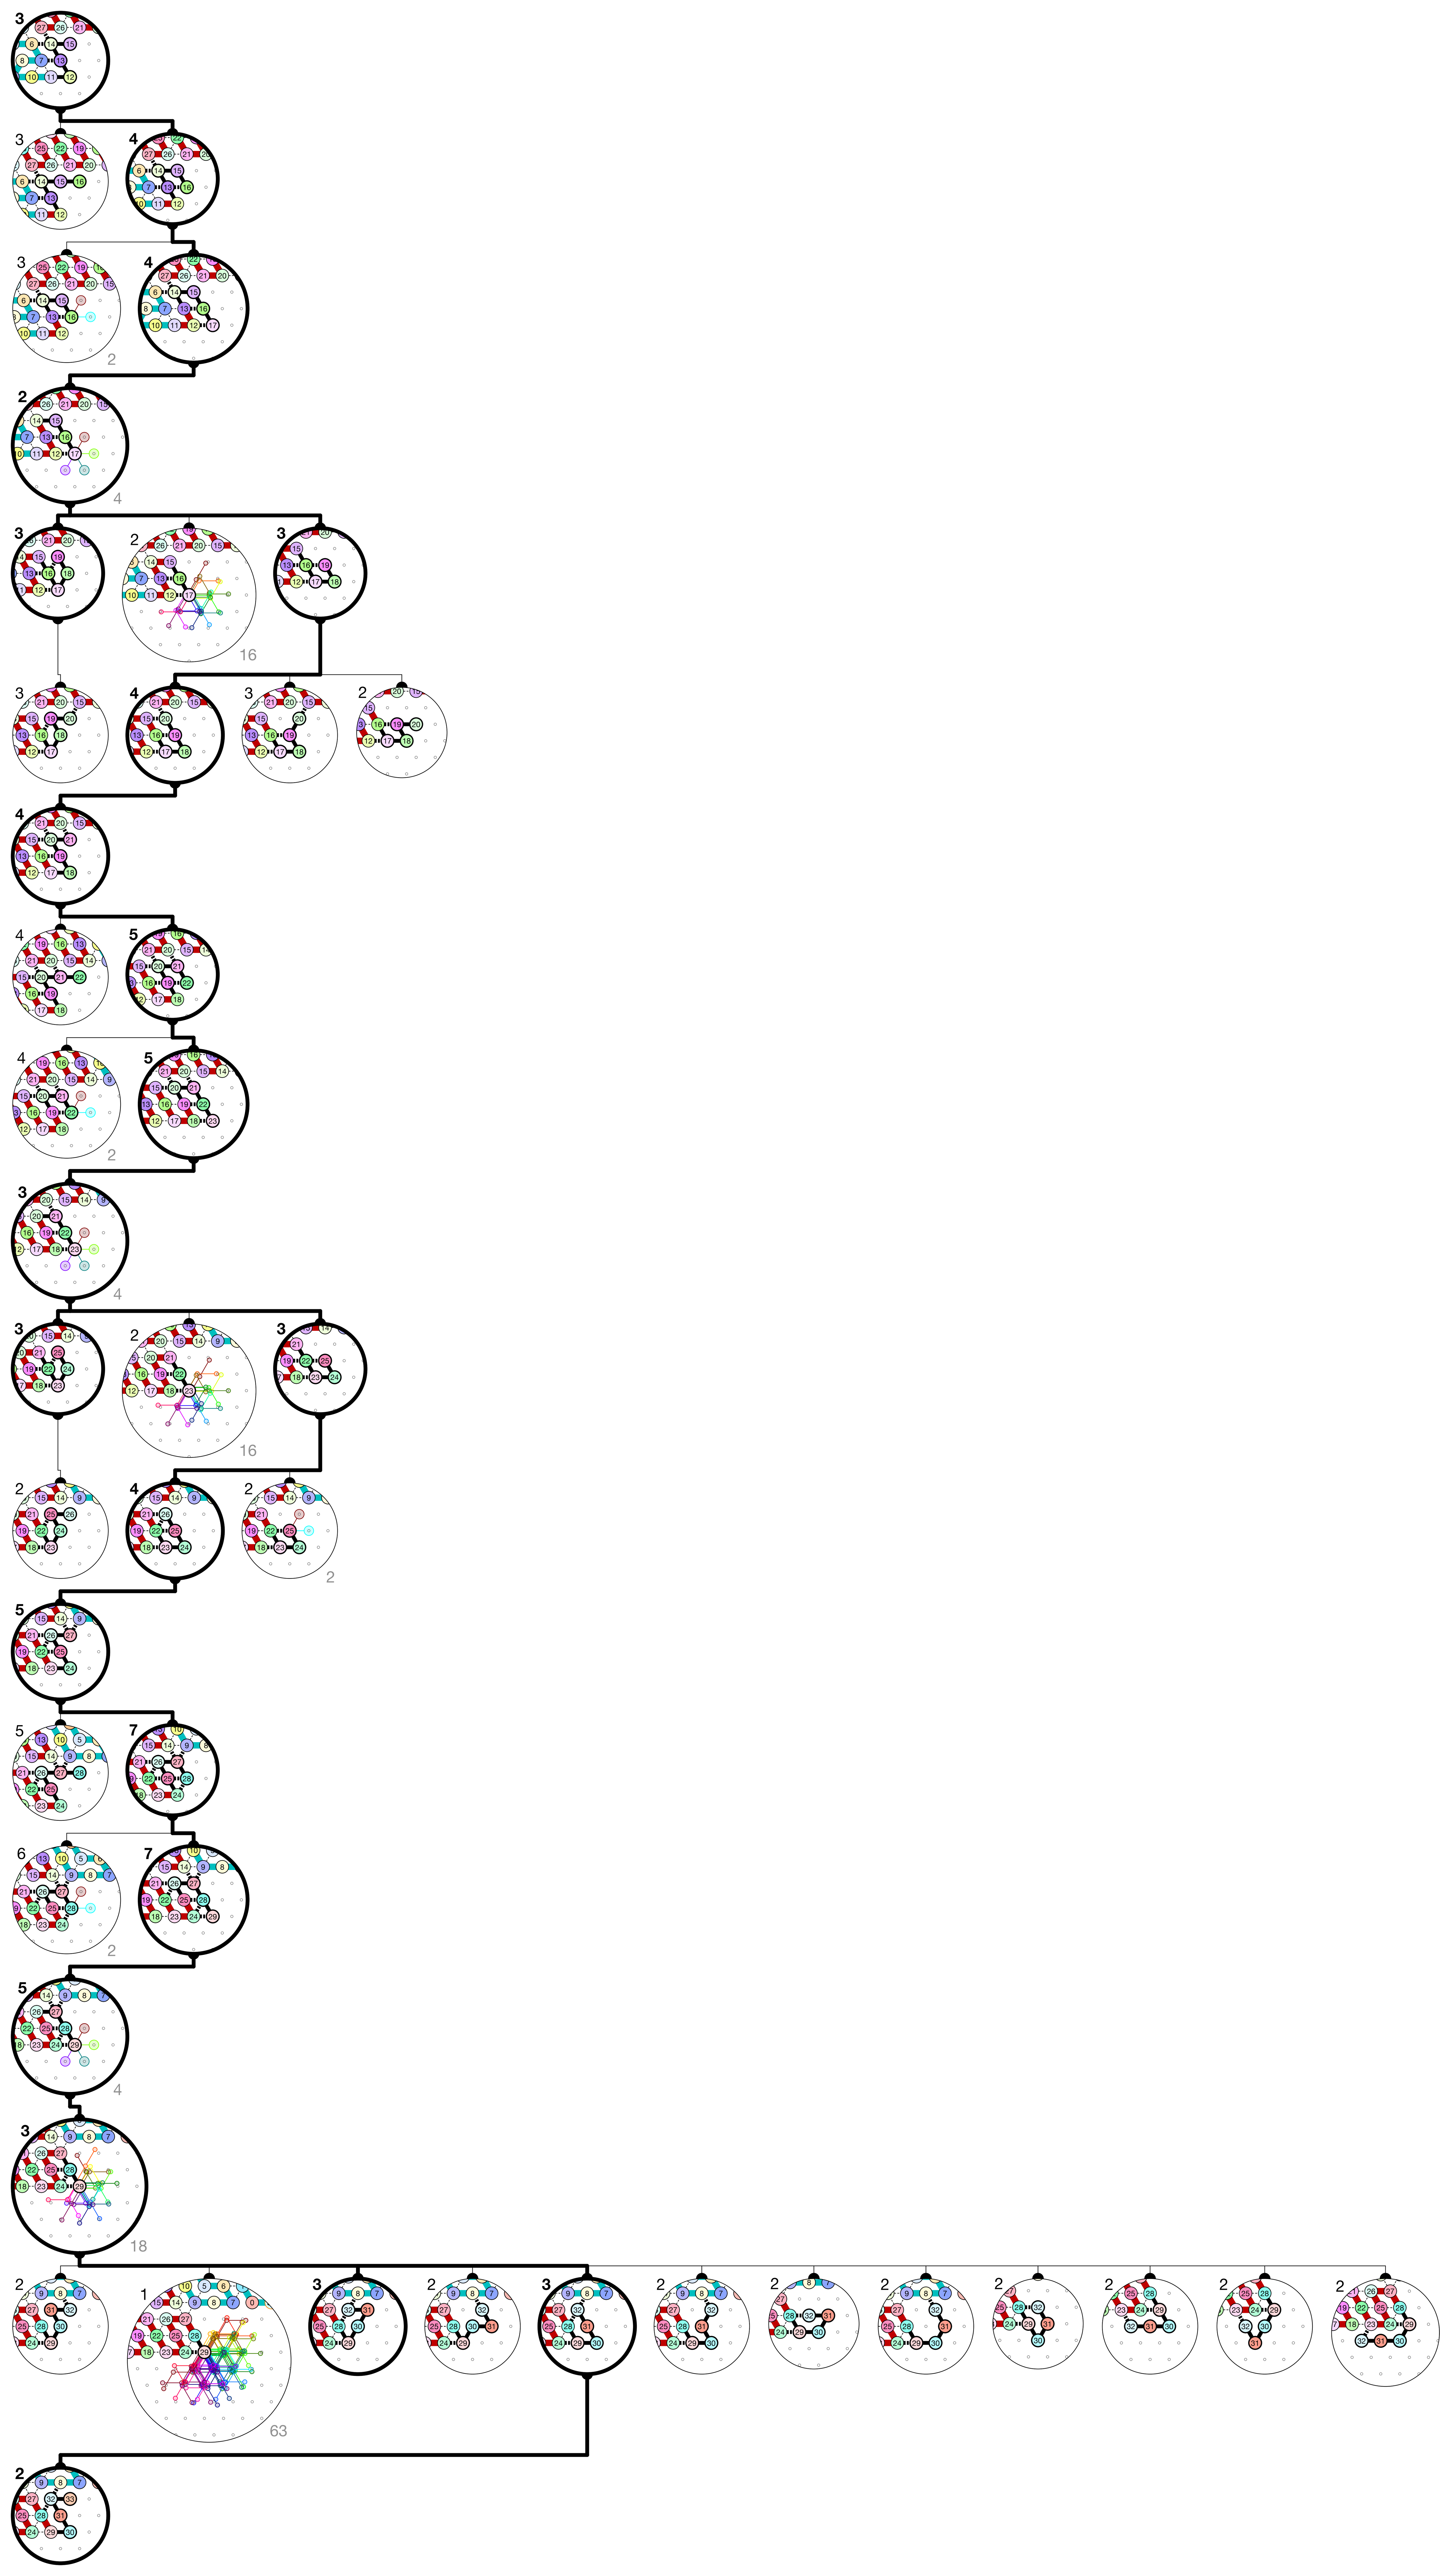

Supplement: s2 [file s2]

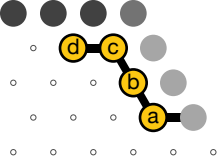

Supplement: s2 [file s2]

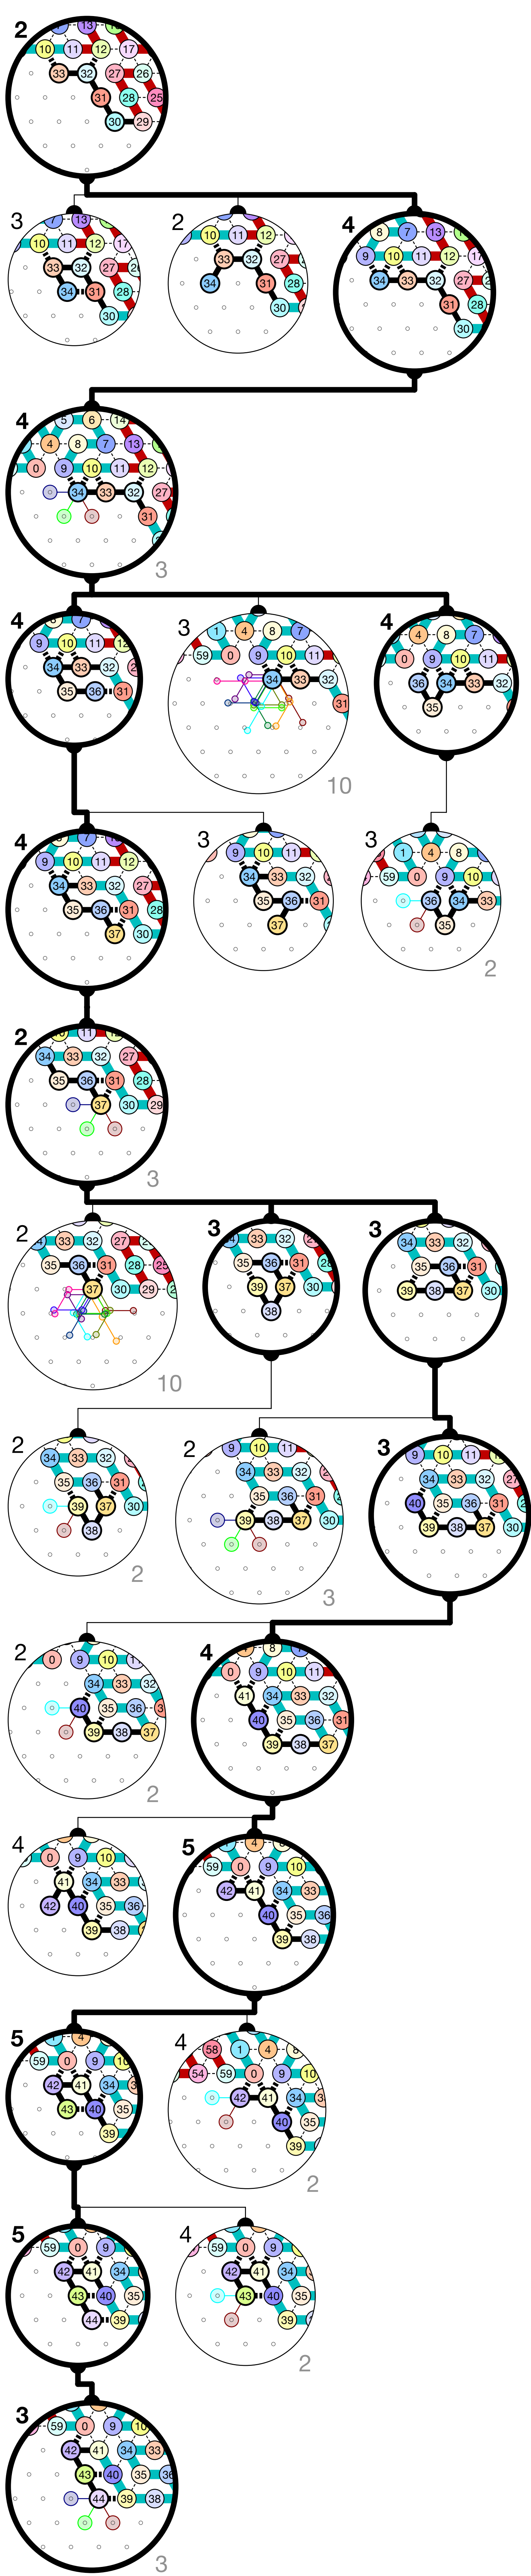

Supplement: s2 [file s2]

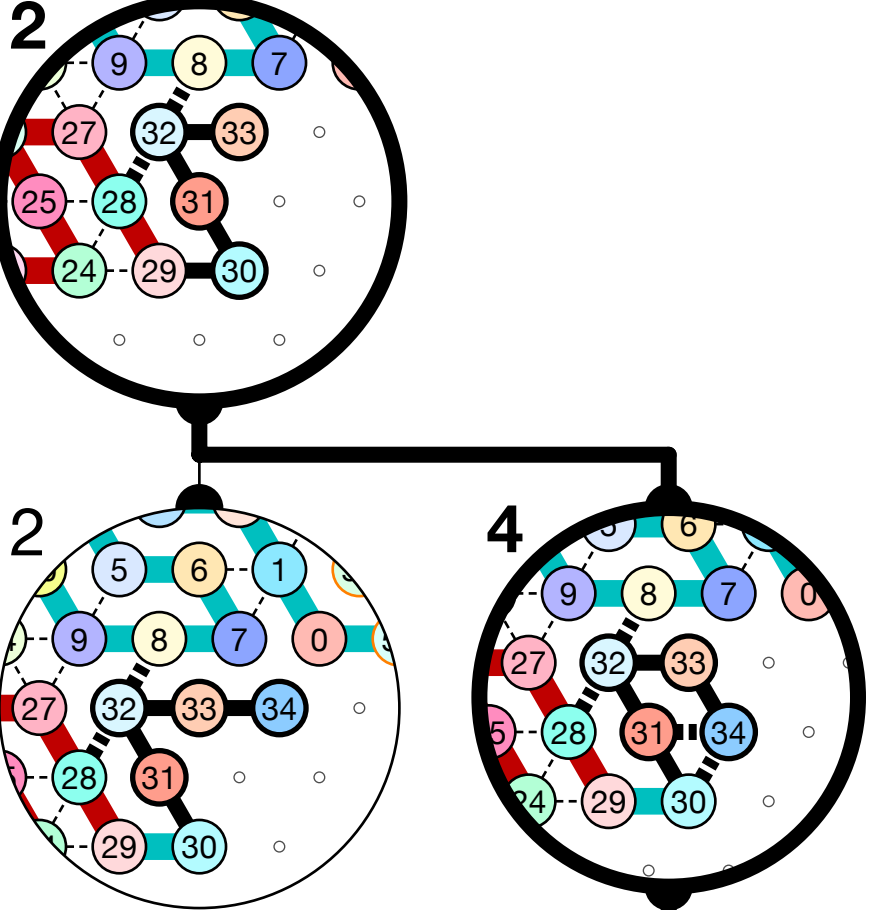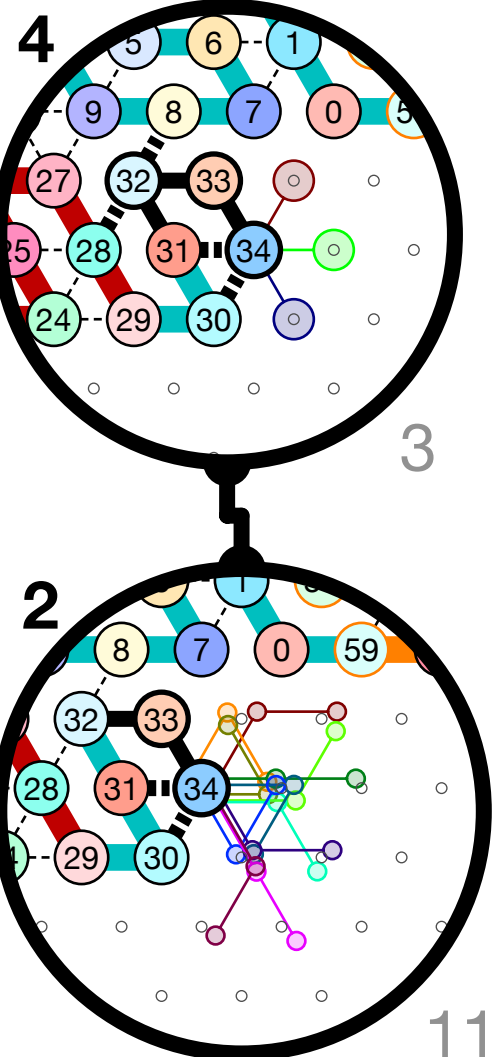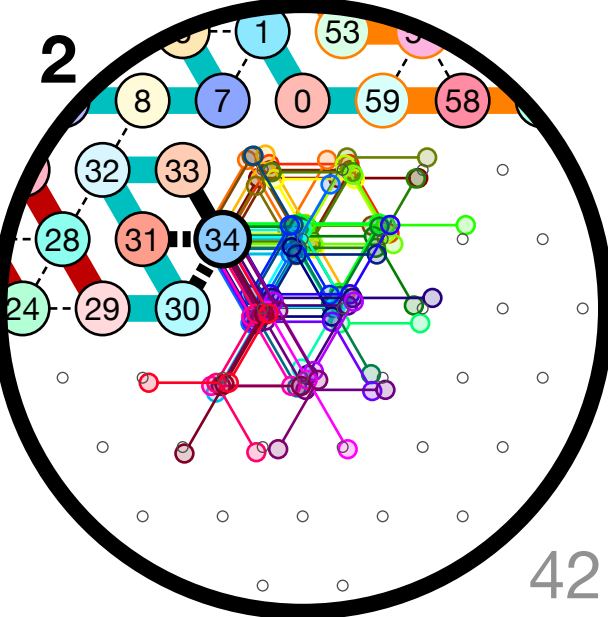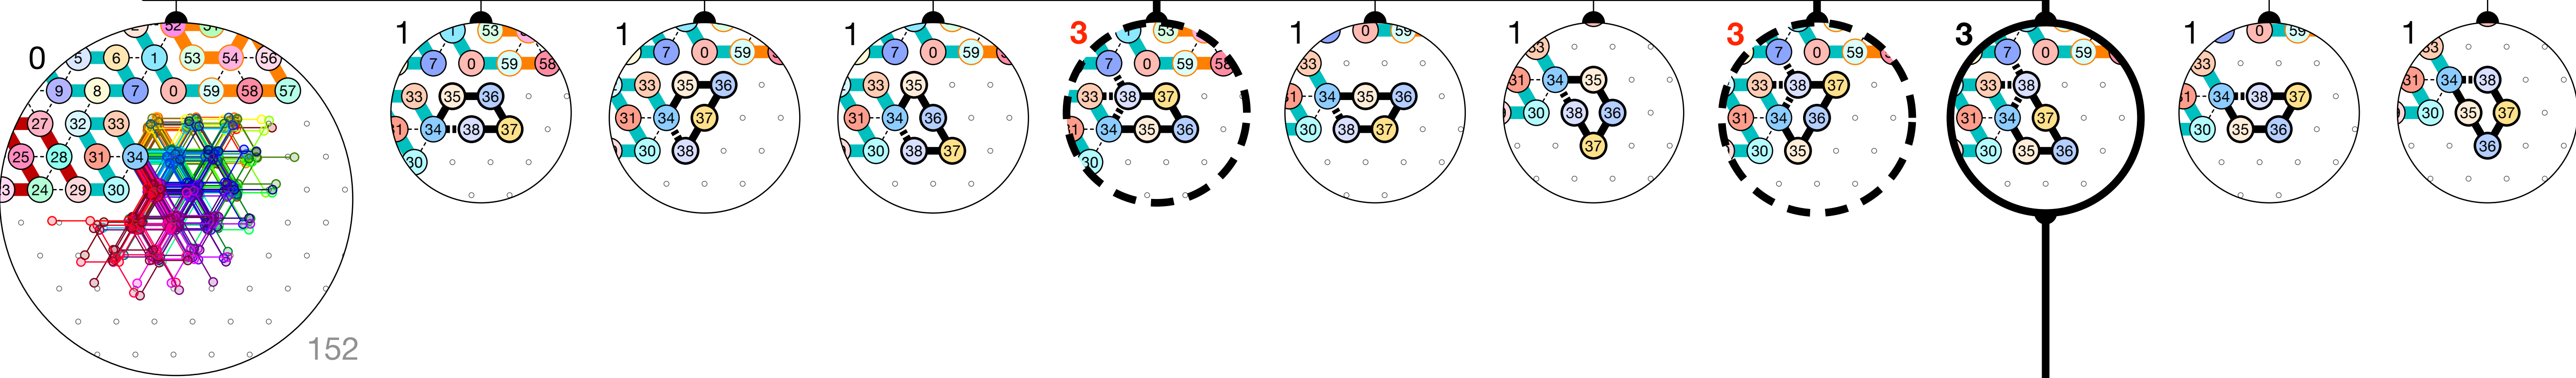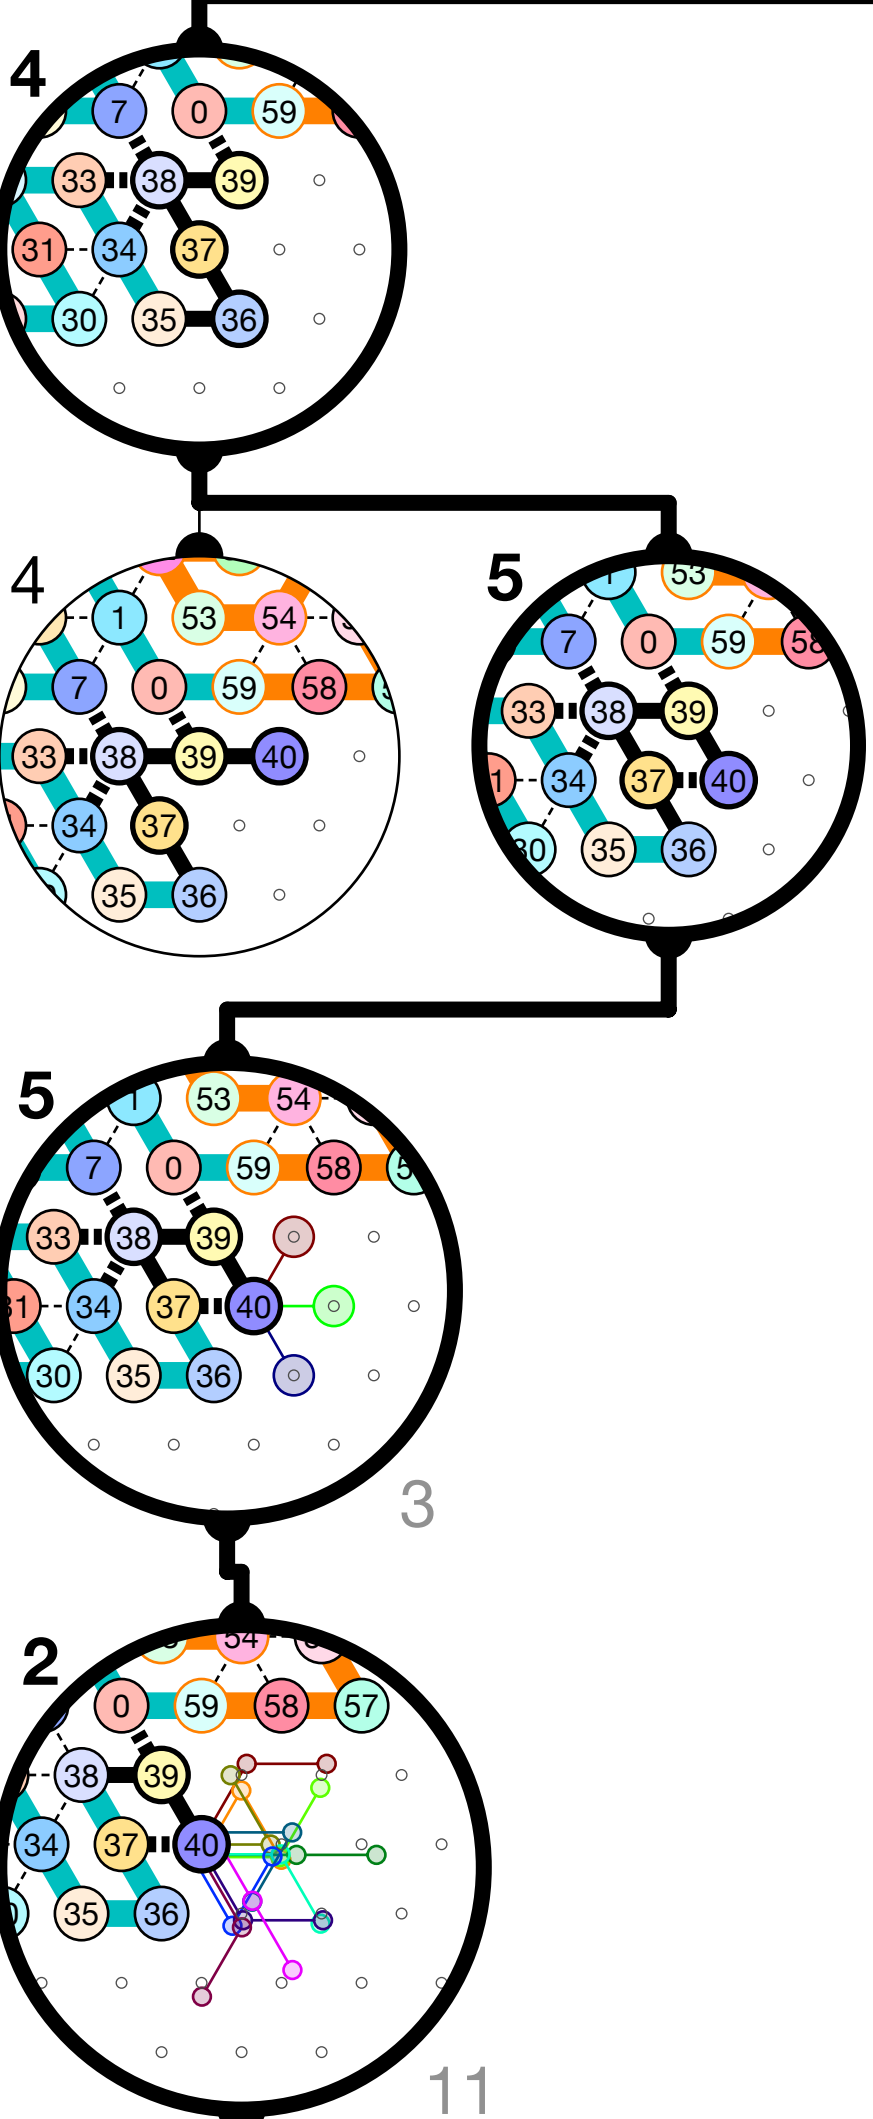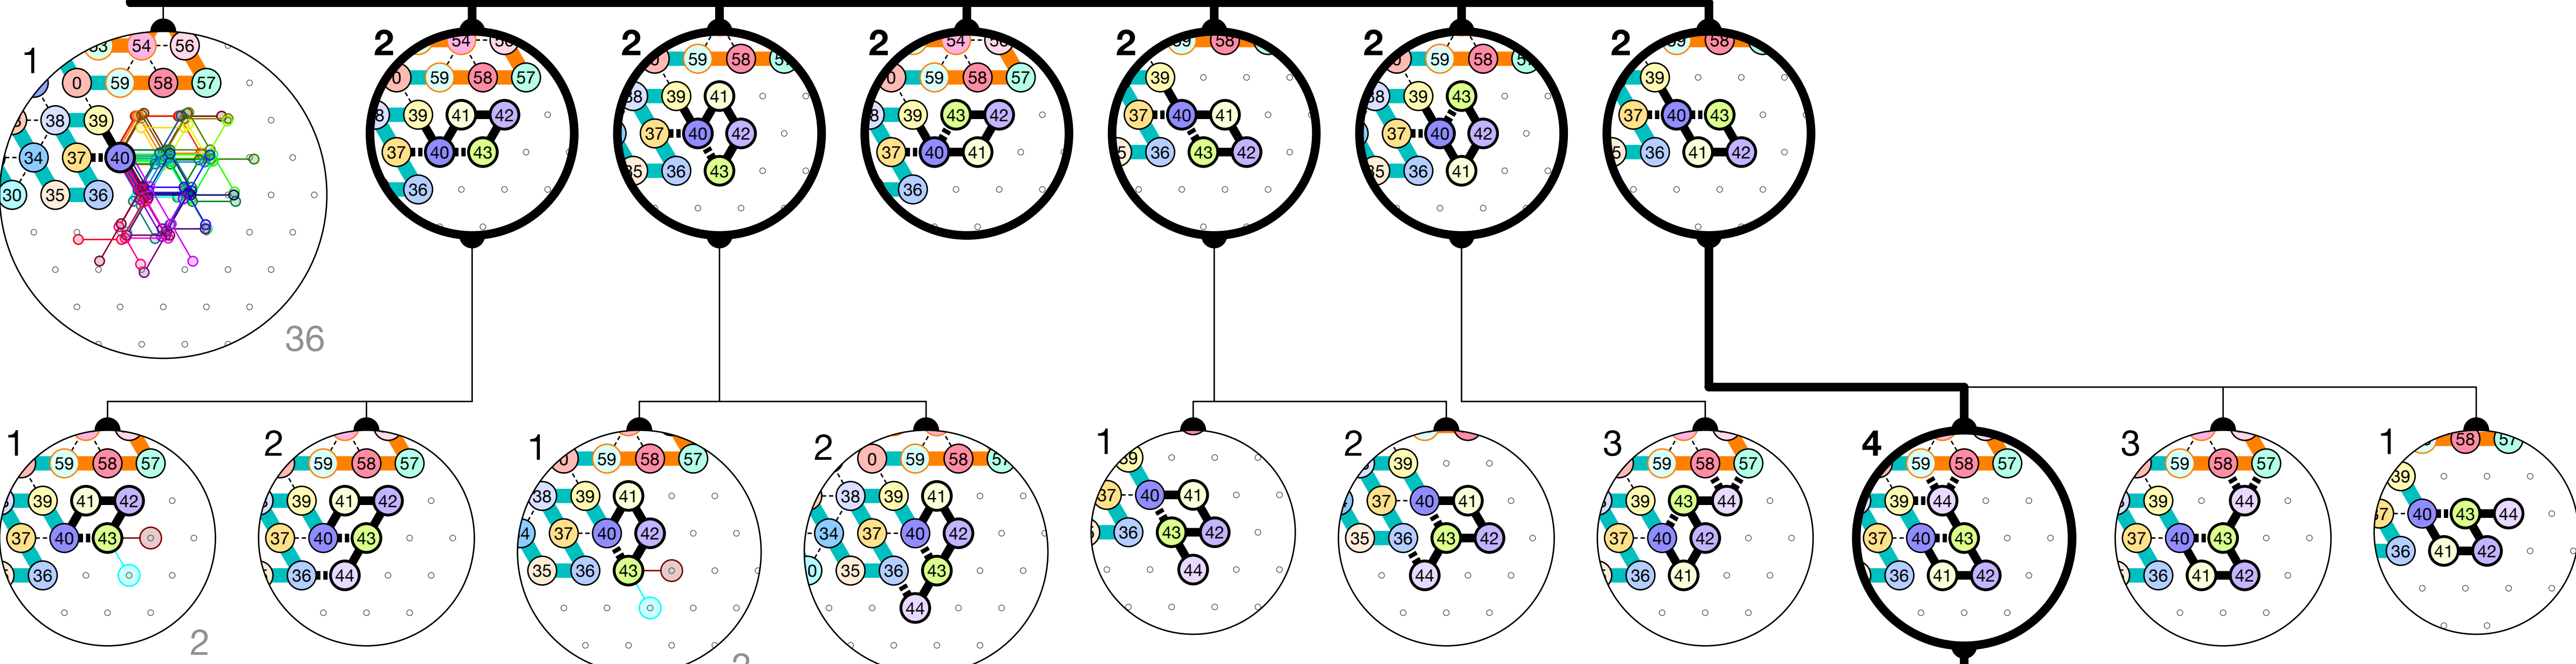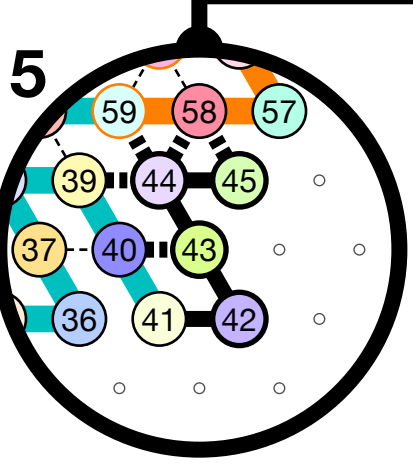

Supplement: s2 [file s2]

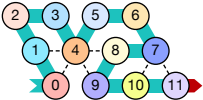

Supplement: s2 [file s2]

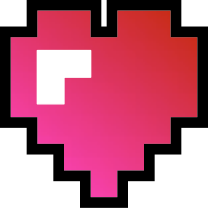

Supplement: s2 [file s2]

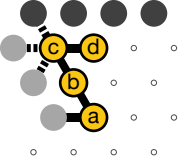

Supplement: s2 [file s2]

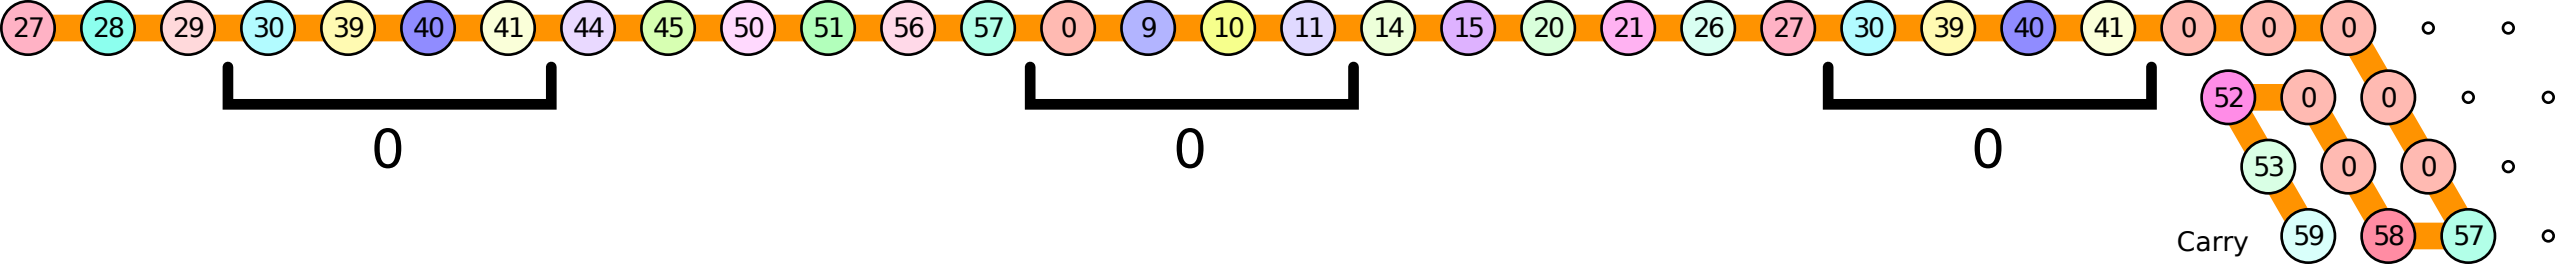

Supplement: s2 [file s2]

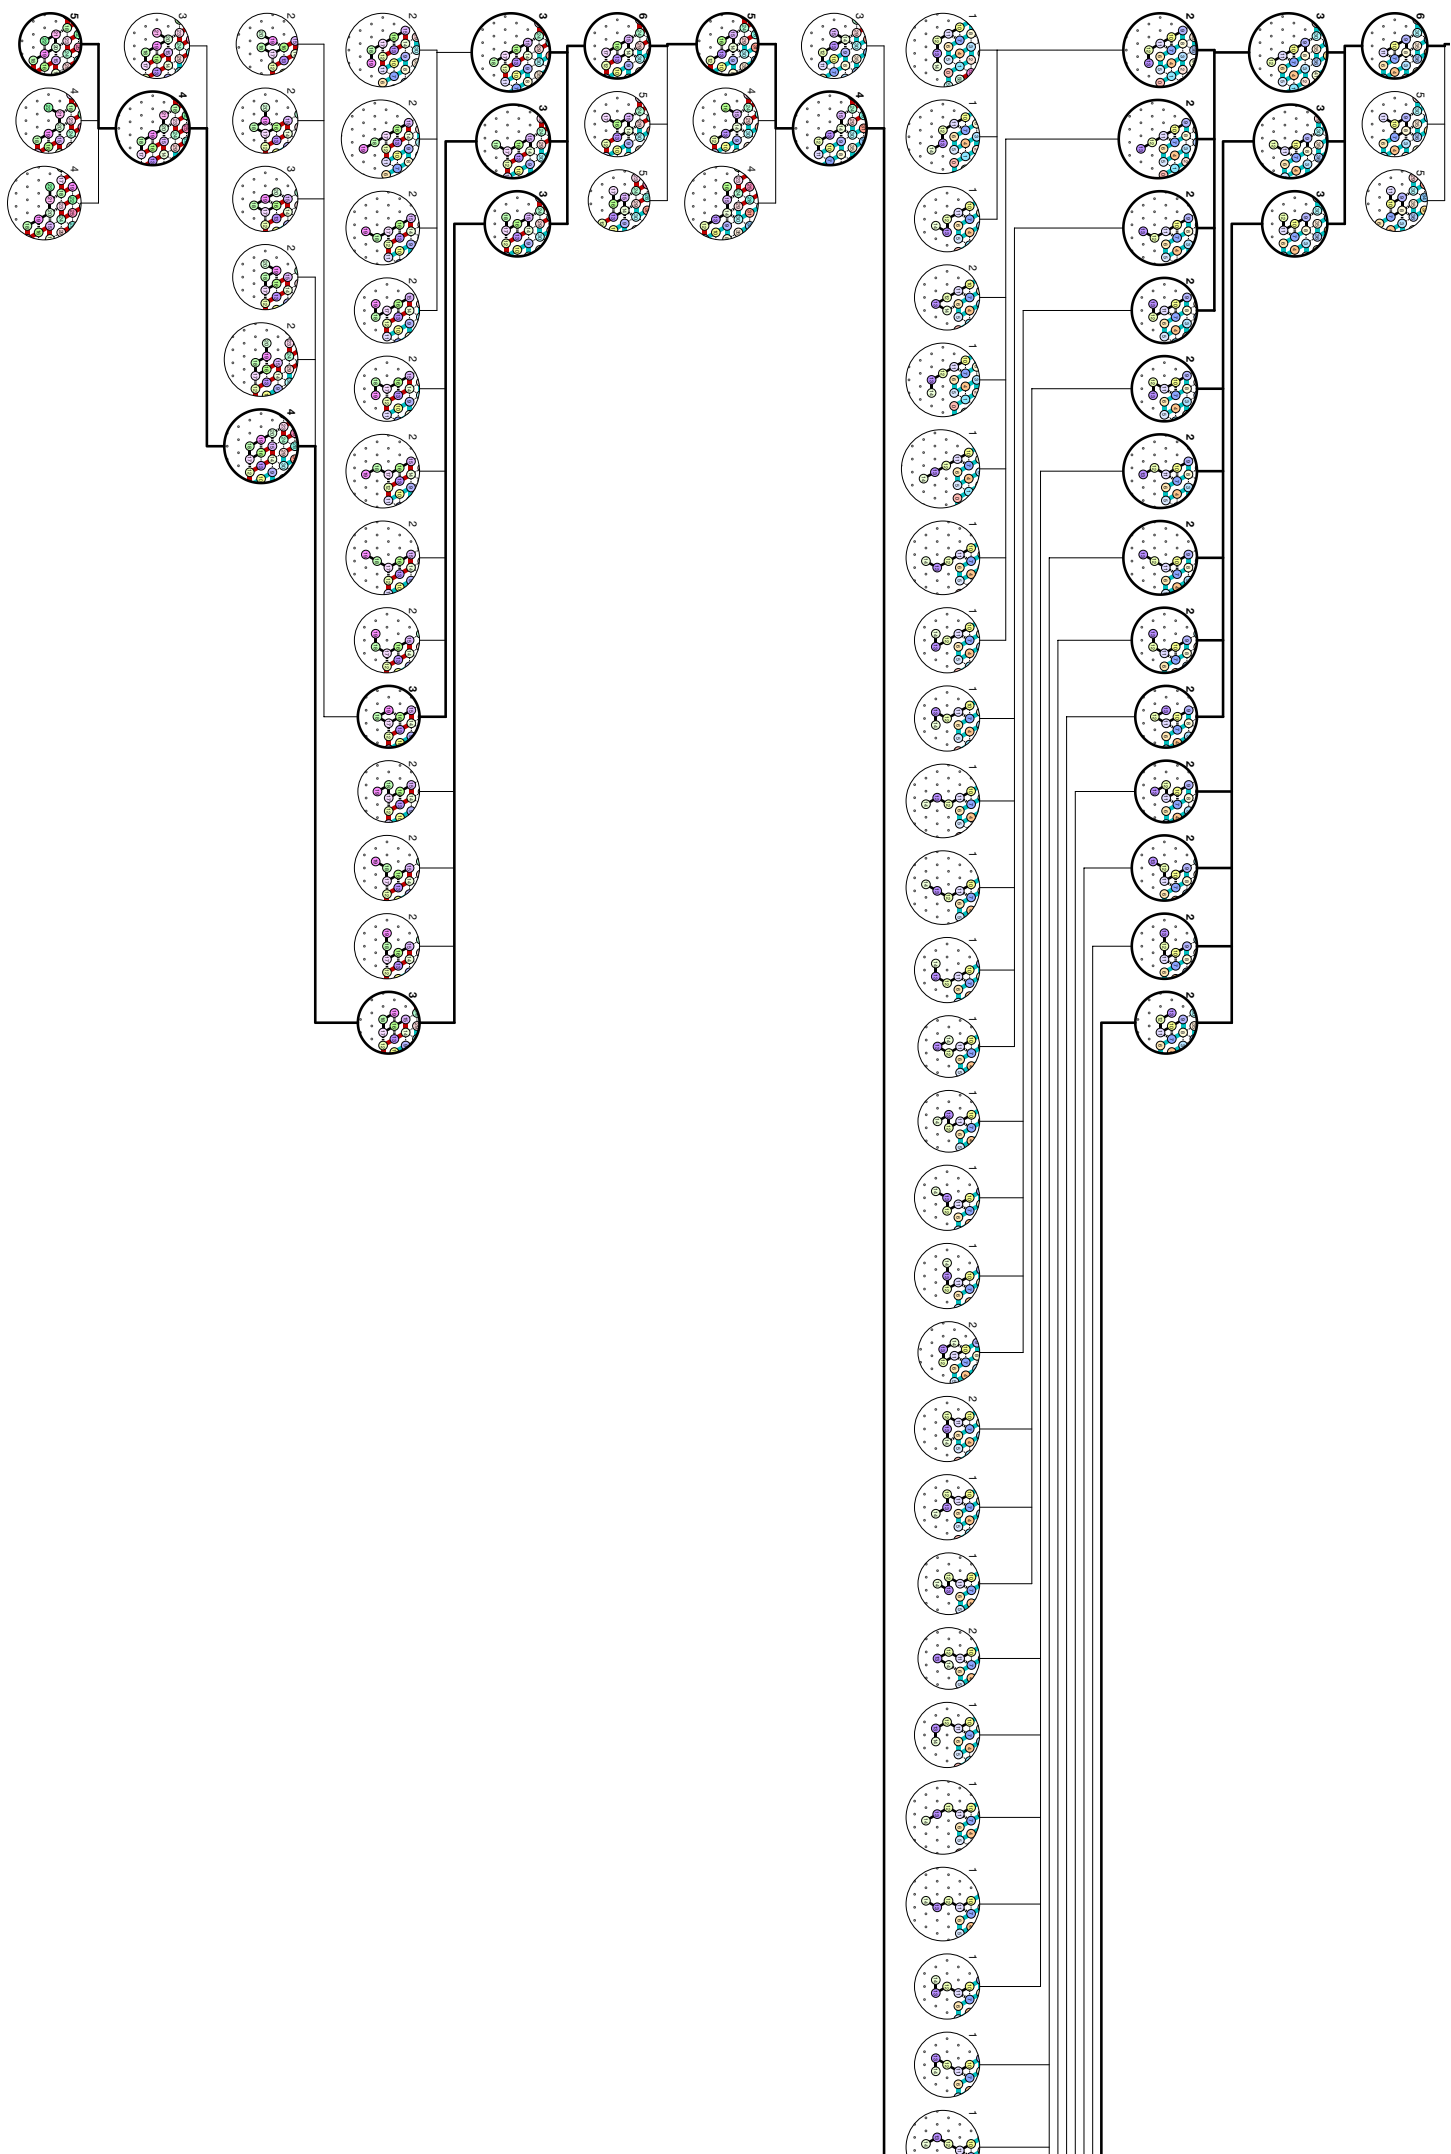

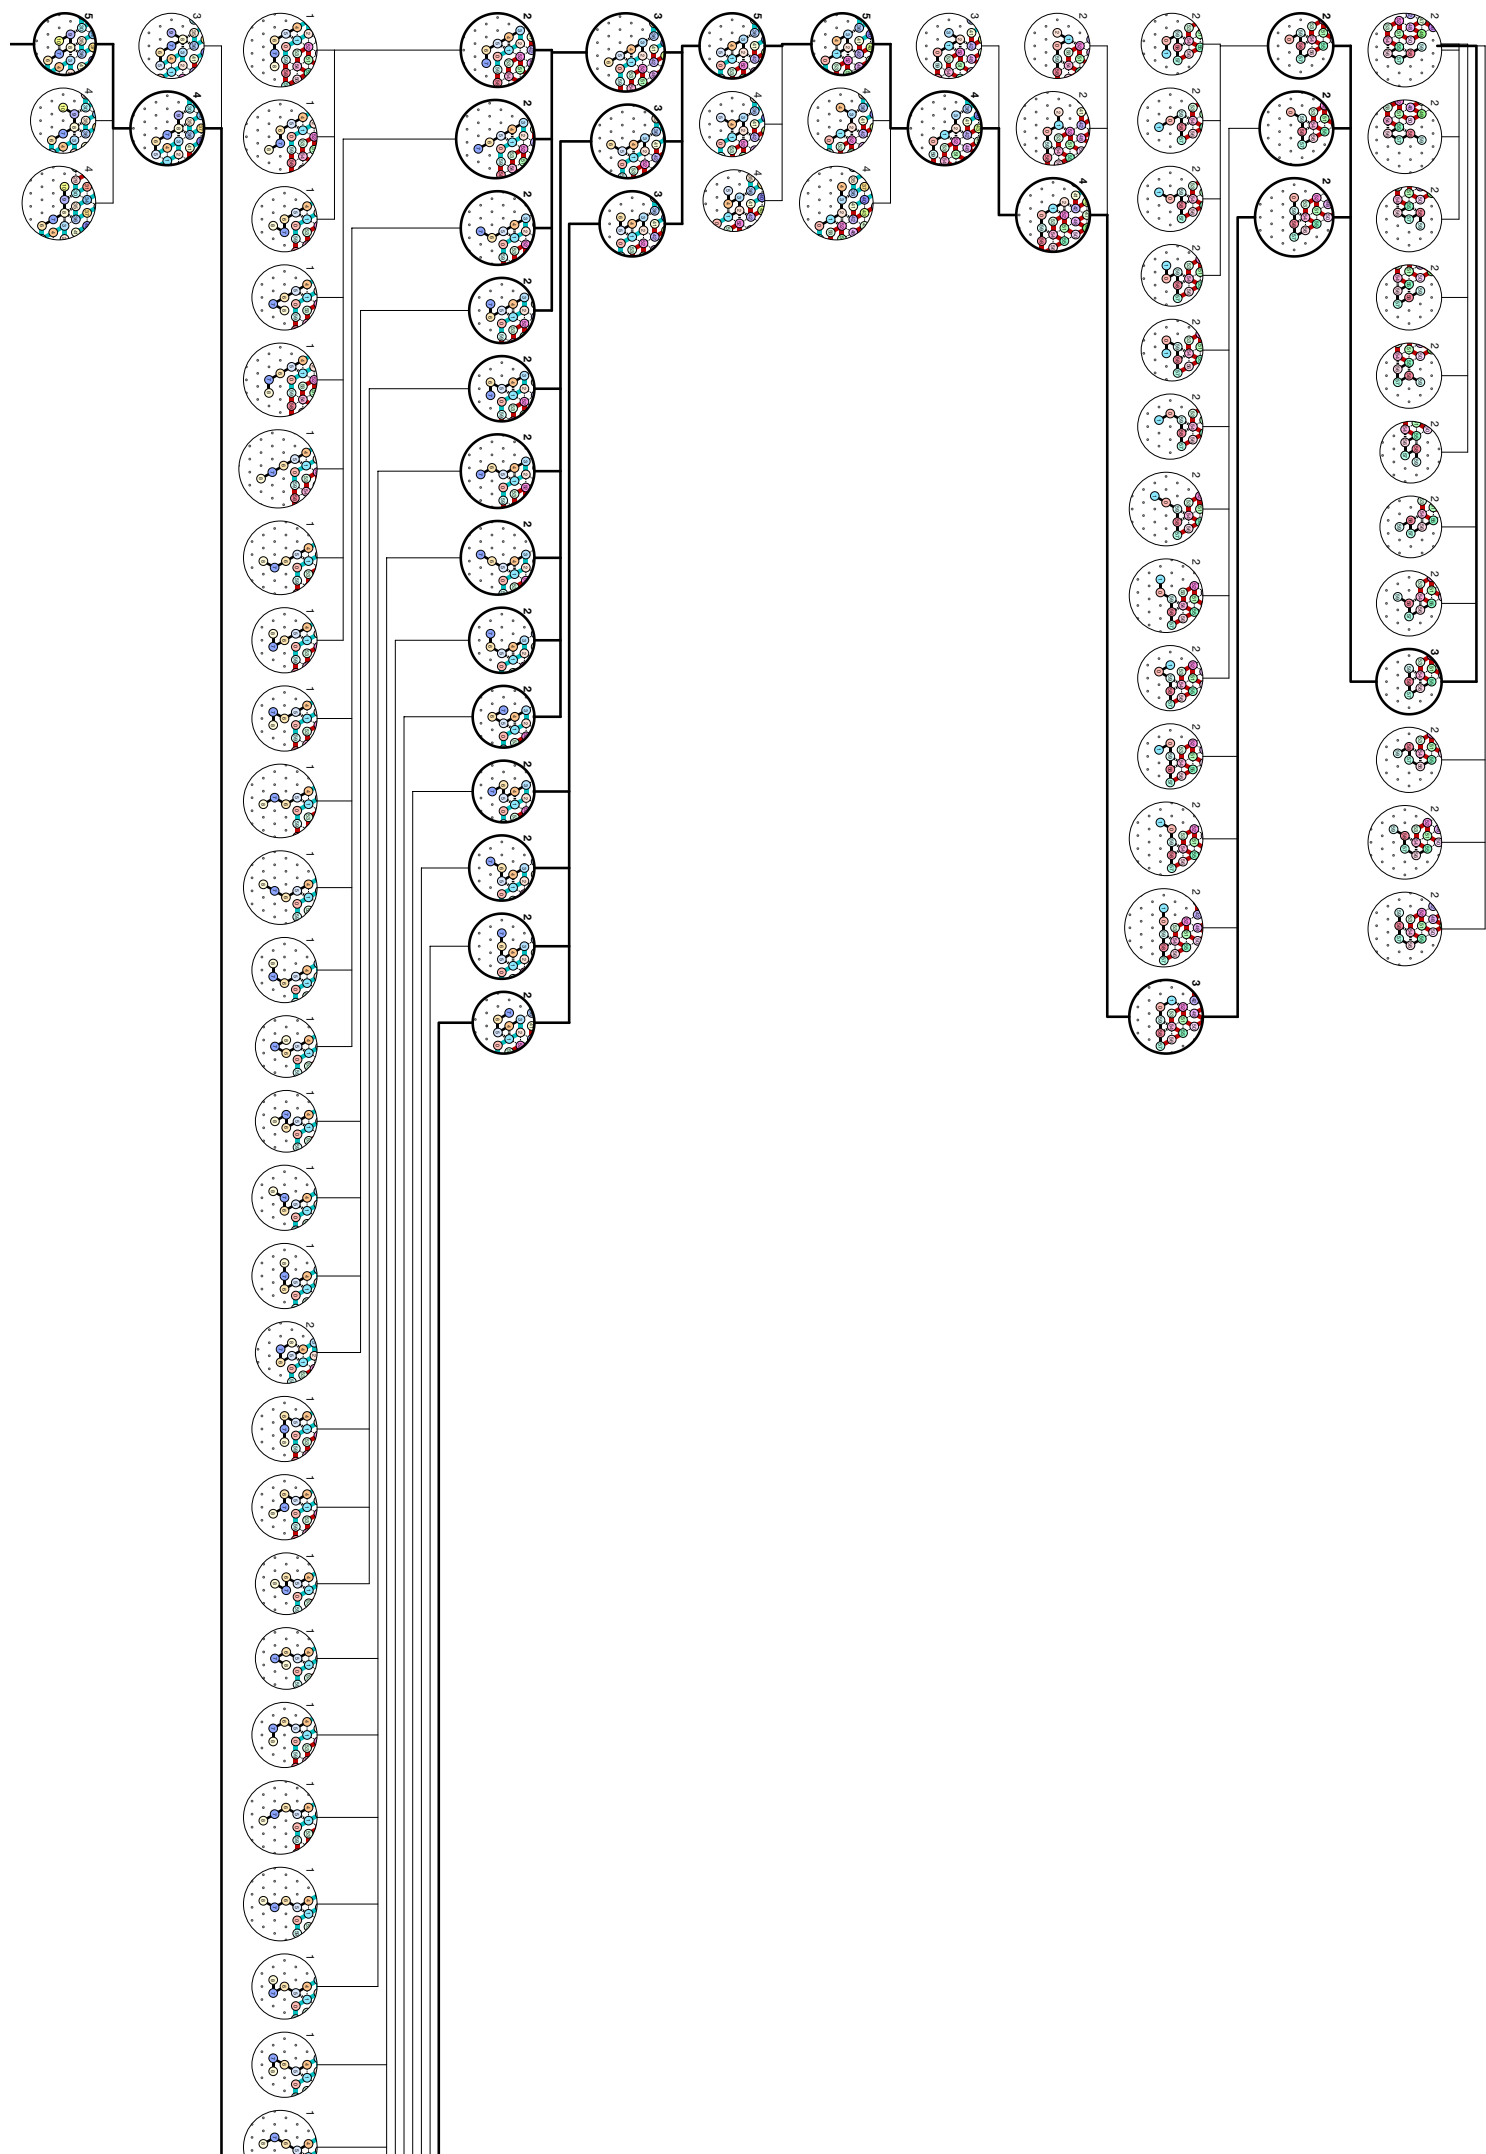

Supplement: s2 [file s2]

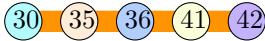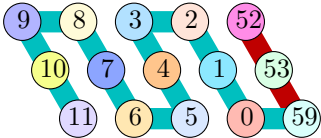

Supplement: s2 [file s2]

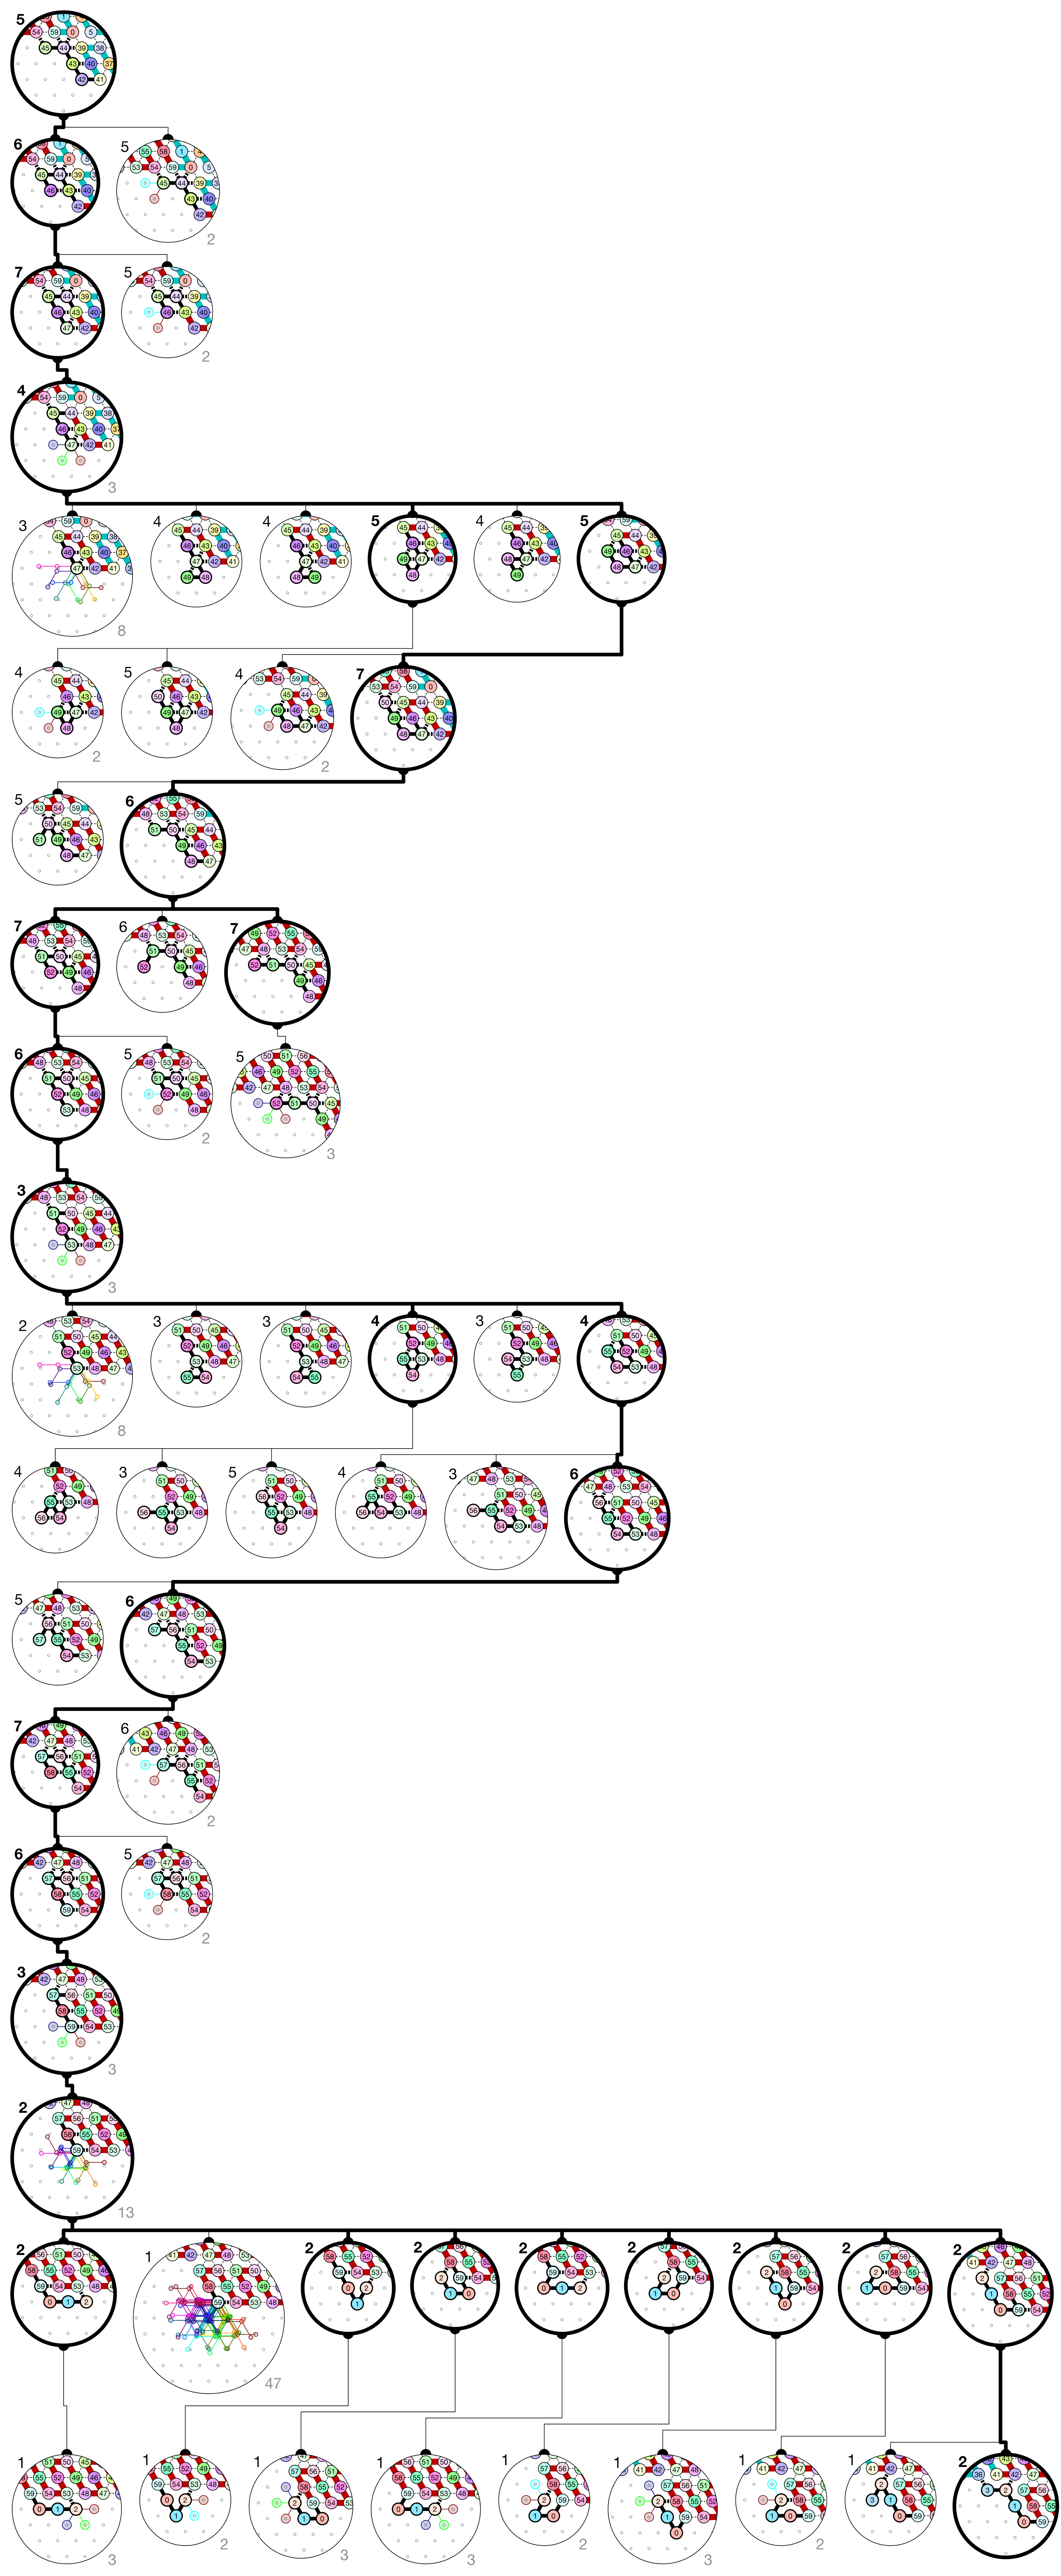

Supplement: s2 [file s2]

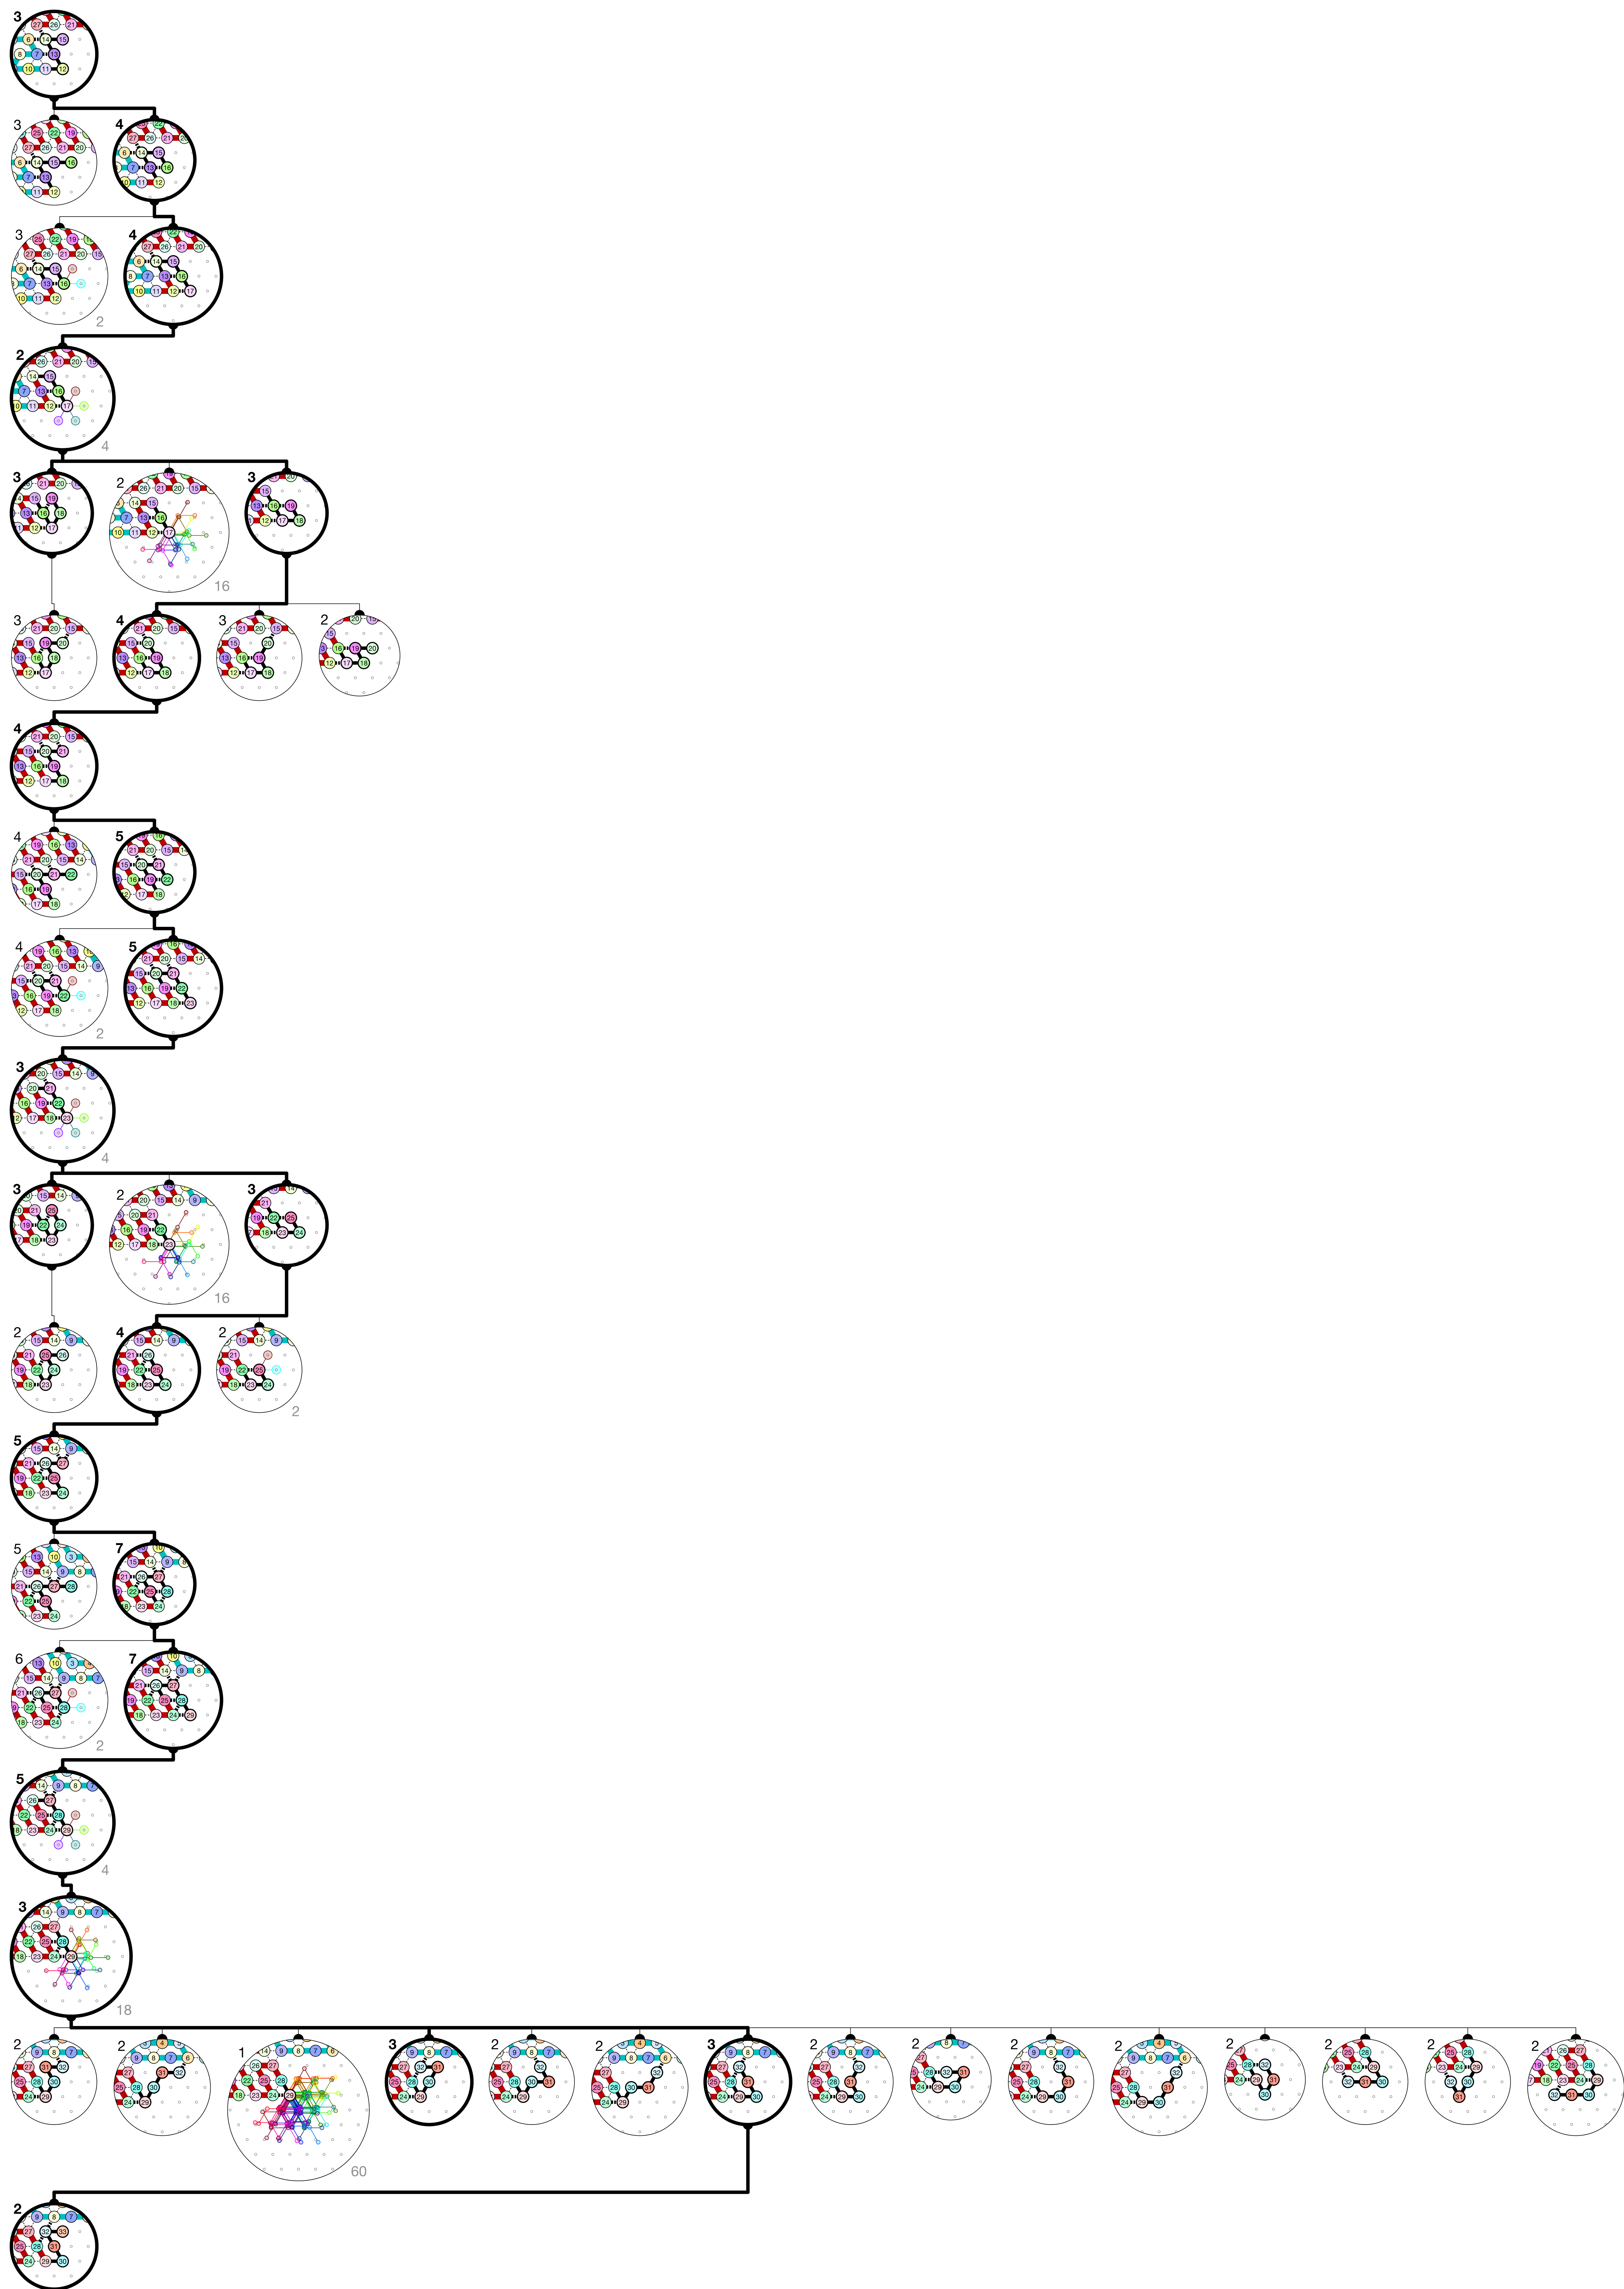

Supplement: s2 [file s2]

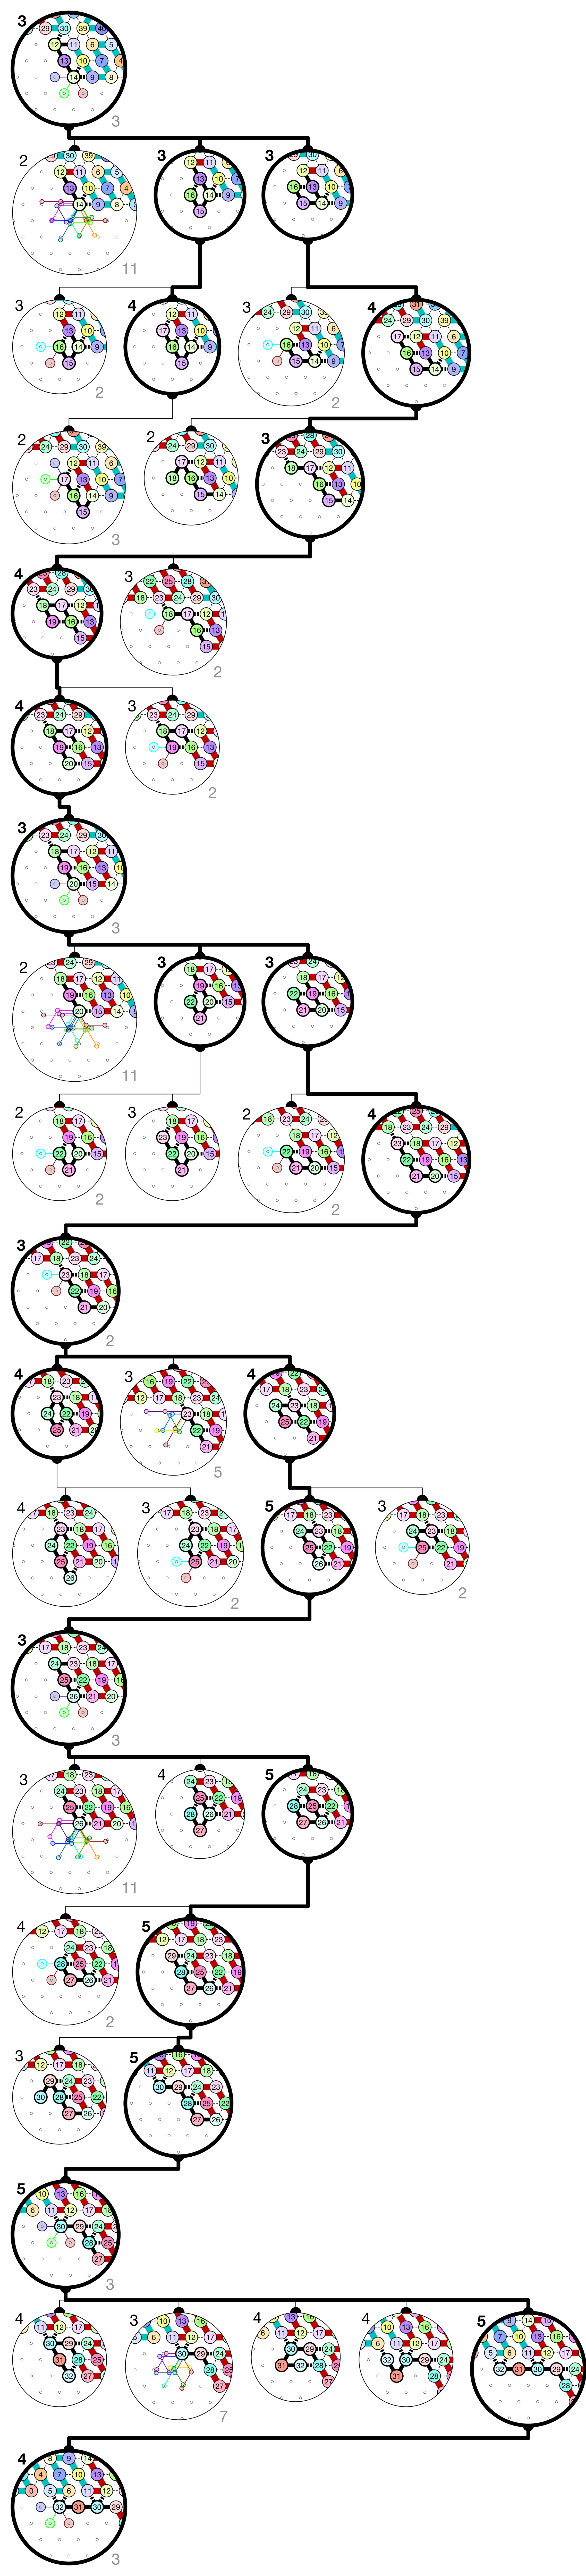

Supplement: s2 [file s2]

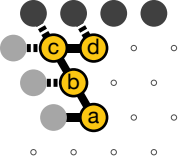

Supplement: s2 [file s2]

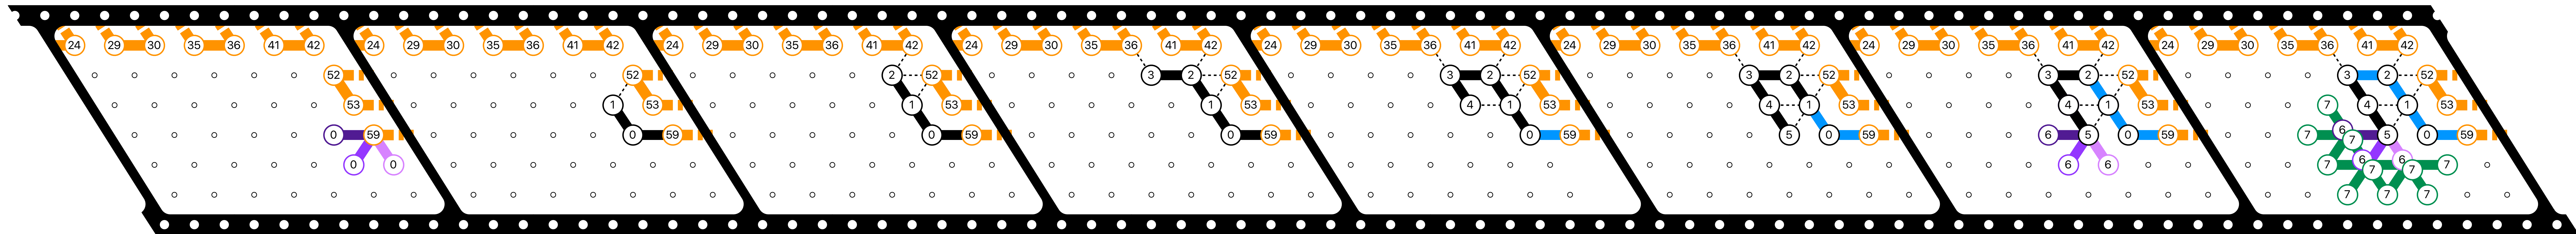

Supplement: s2 [file s2]

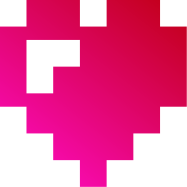

Supplement: s2 [file s2]

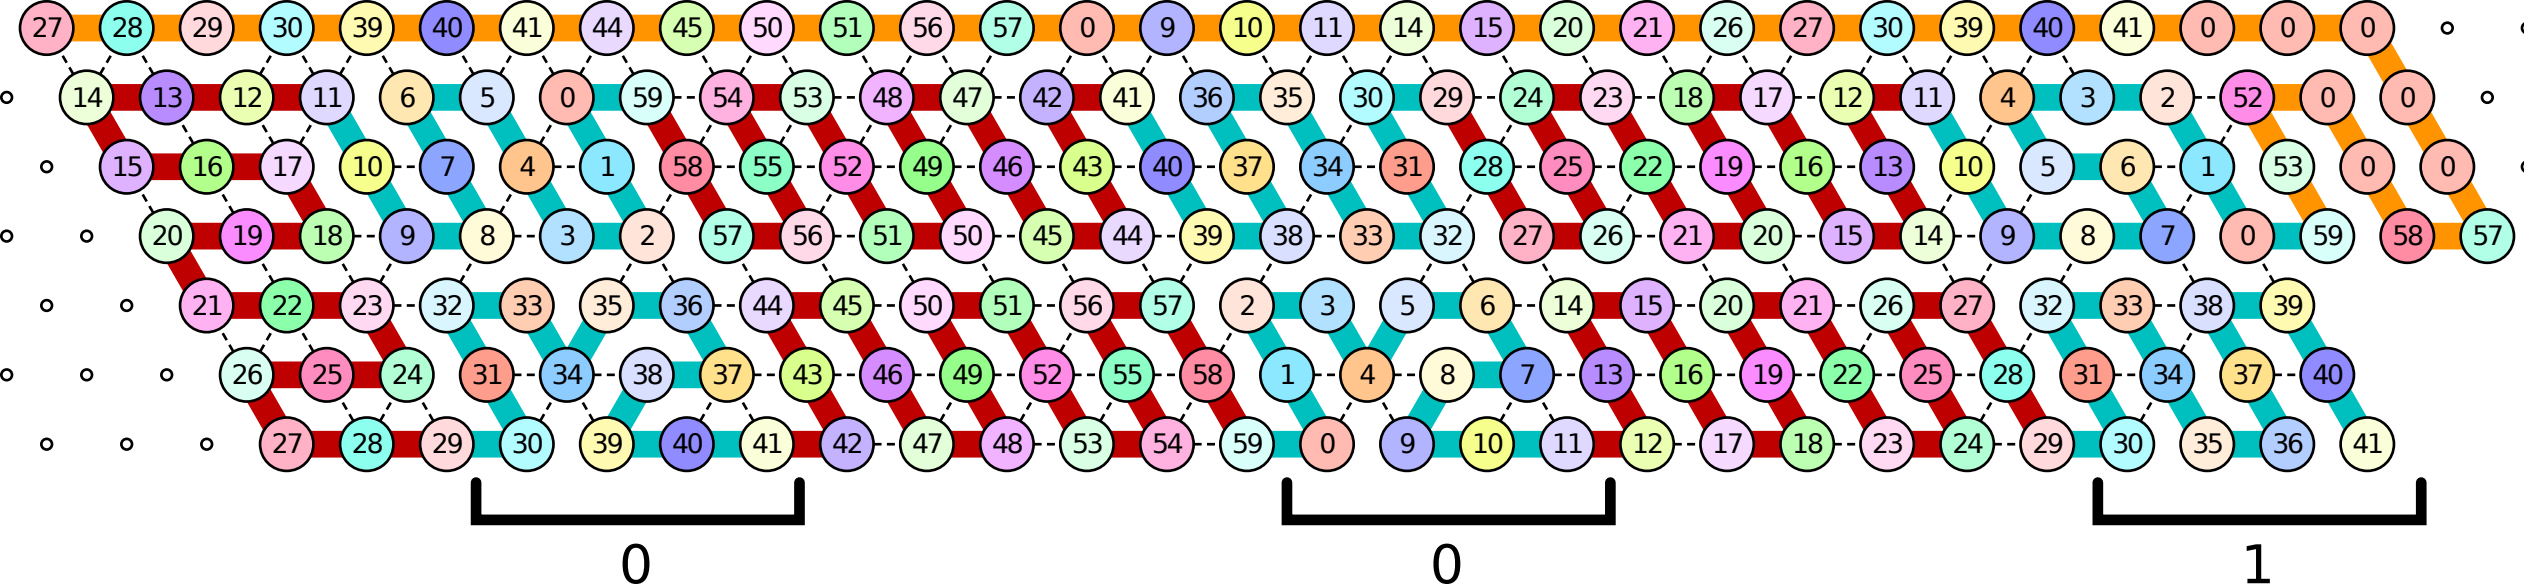

Supplement: s2 [file s2]

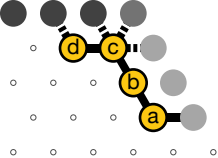

Supplement: s2 [file s2]

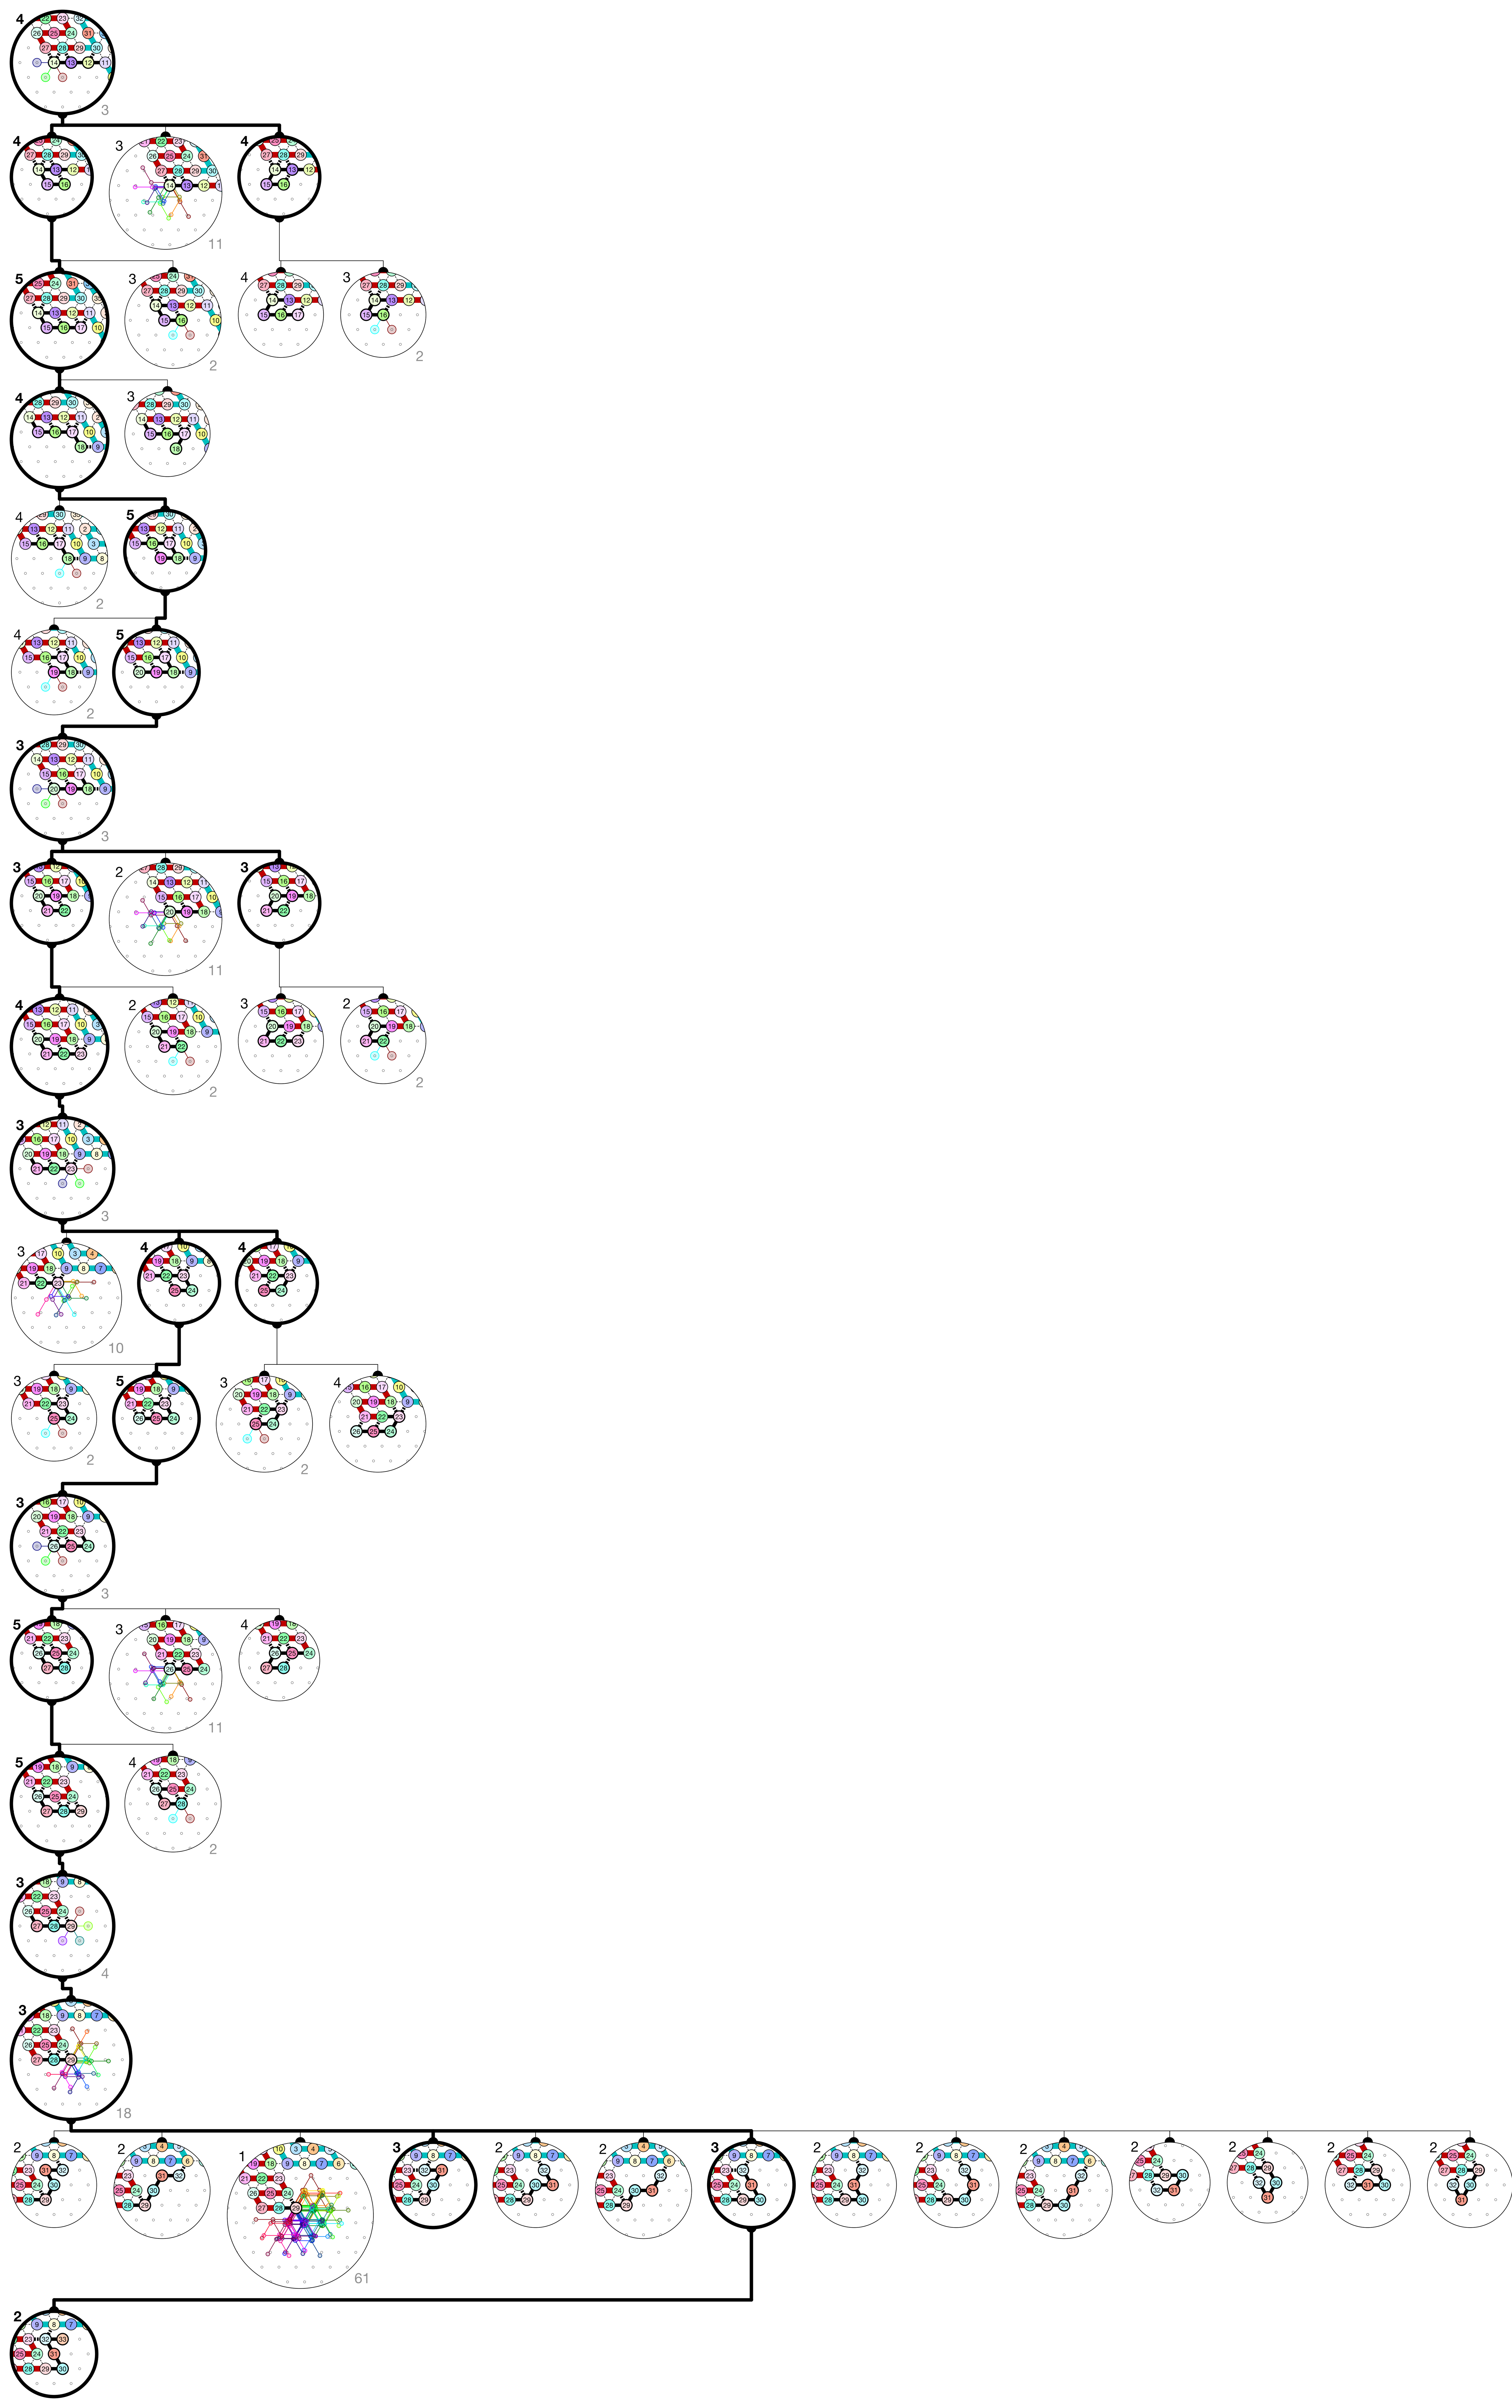

Supplement: s2 [file s2]

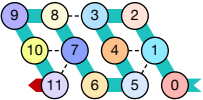

Supplement: s2 [file s2]

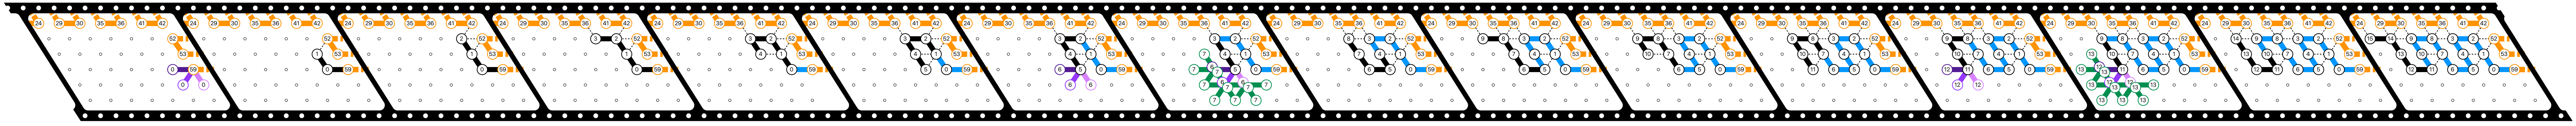

Supplement: s2 [file s2]

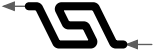

Supplement: s2 [file s2]

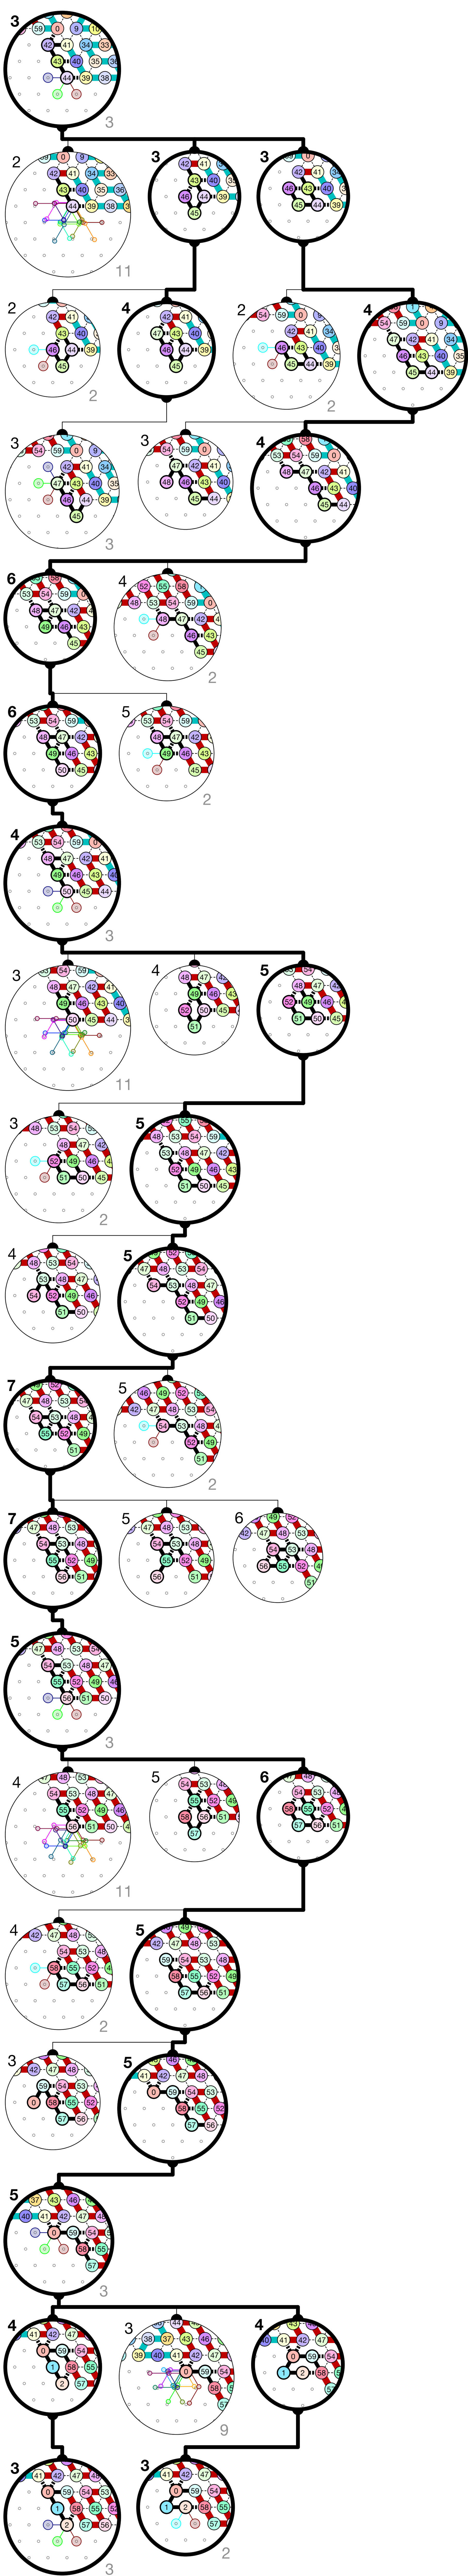

Supplement: s2 [file s2]

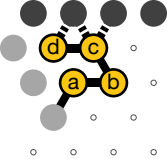

Supplement: s2 [file s2]

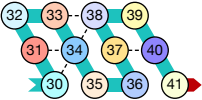

Supplement: s2 [file s2]

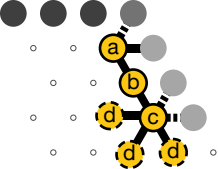

Supplement: s2 [file s2]

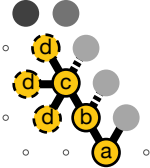

Supplement: s2 [file s2]

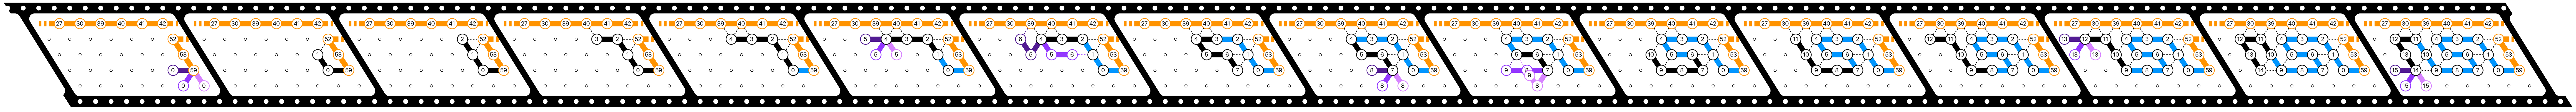

Supplement: s2 [file s2]

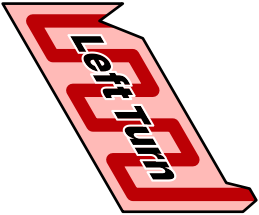

Supplement: s2 [file s2]



**Zig 0+1**

Supplement: s2 [file s2]

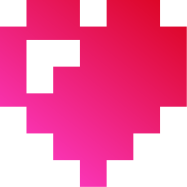

Supplement: s2 [file s2]

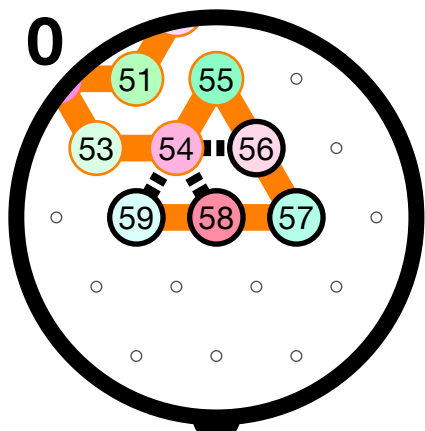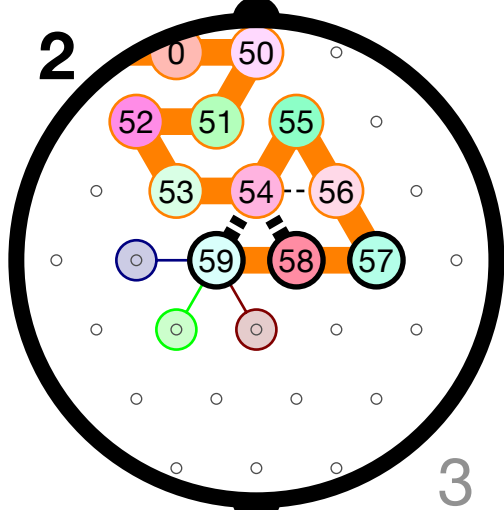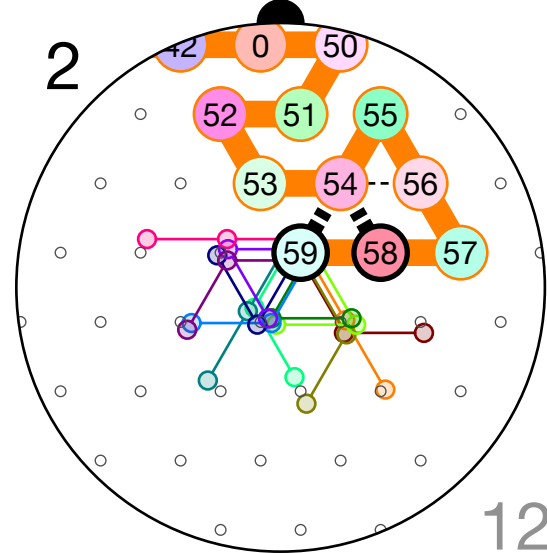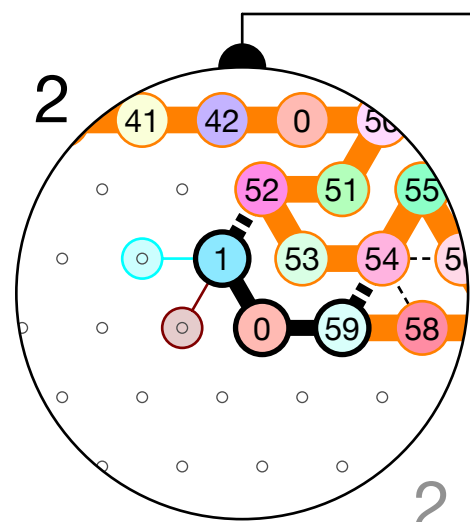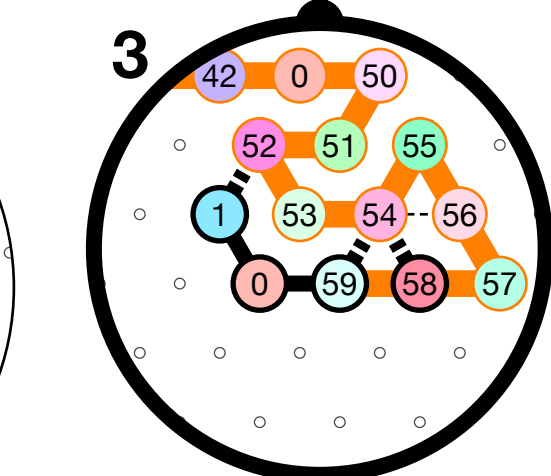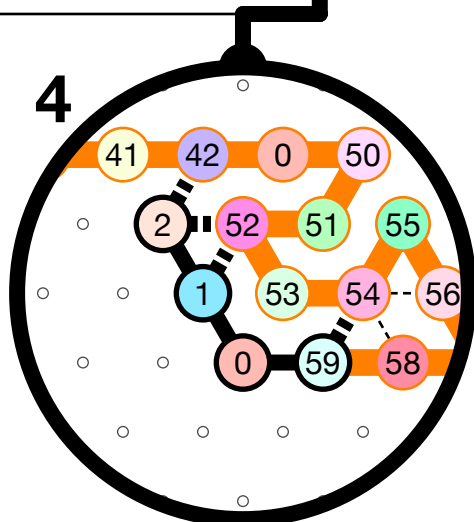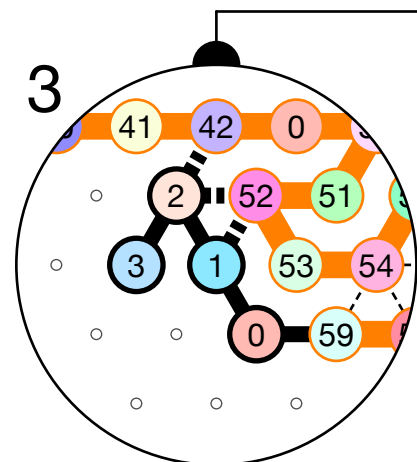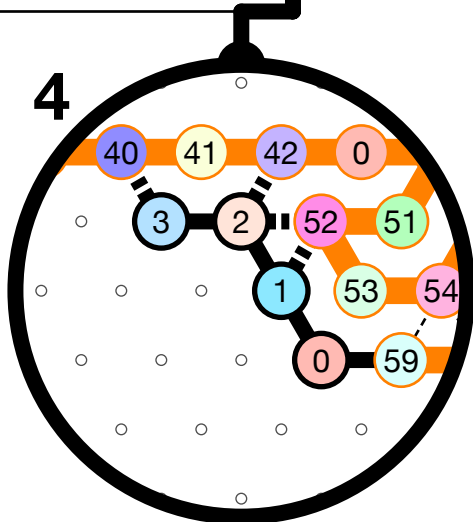

Supplement: s2 [file s2]

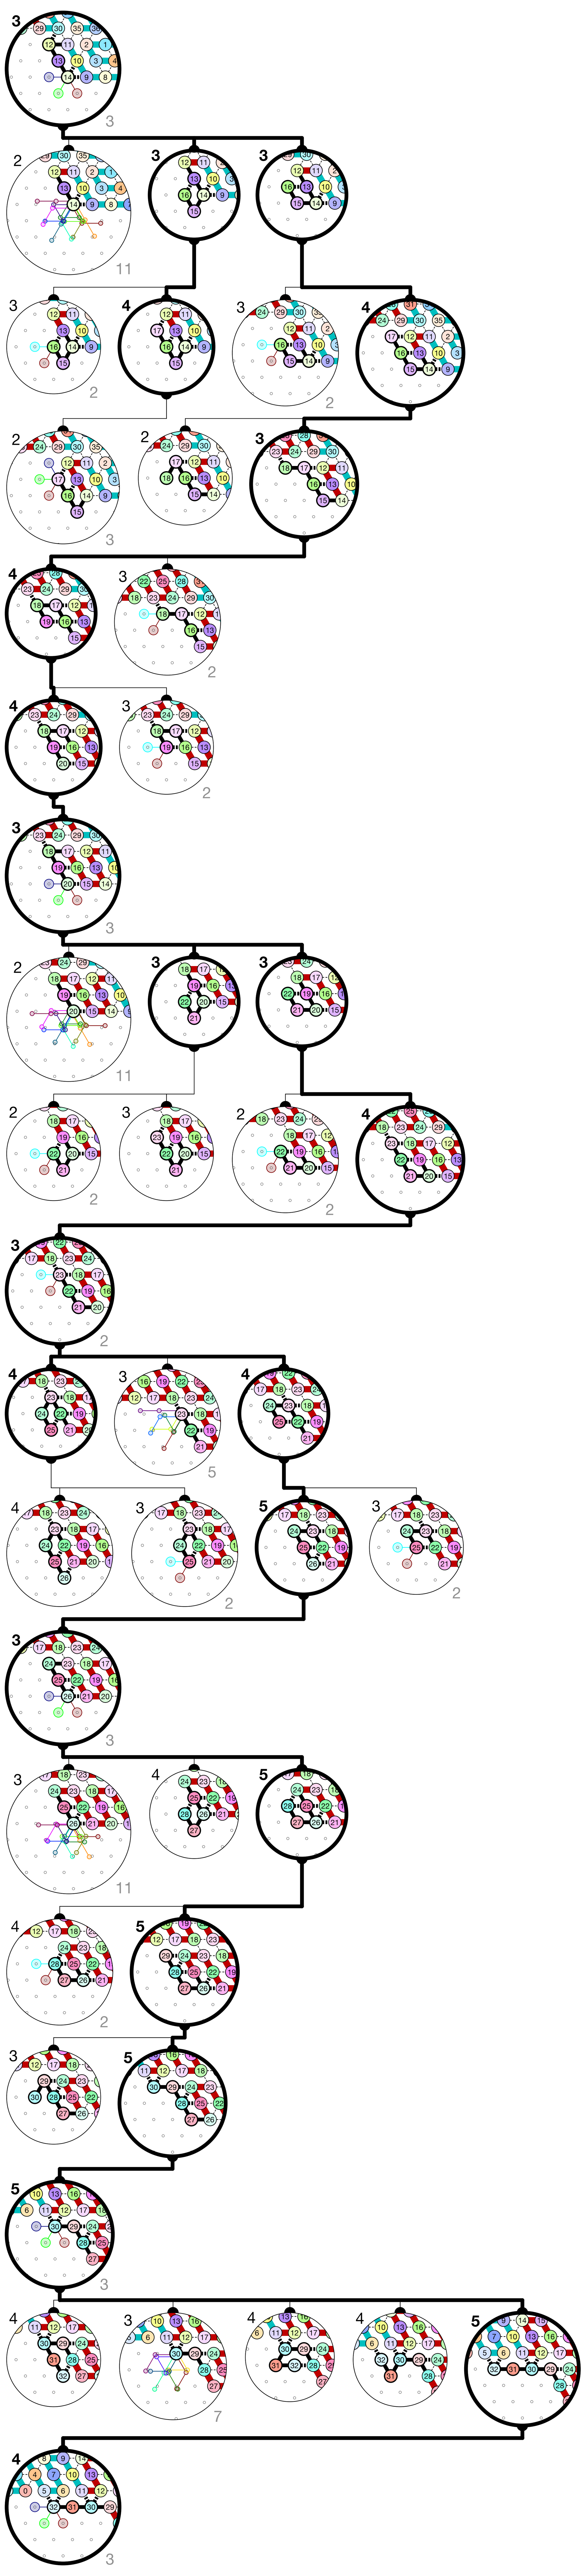

Supplement: s2 [file s2]

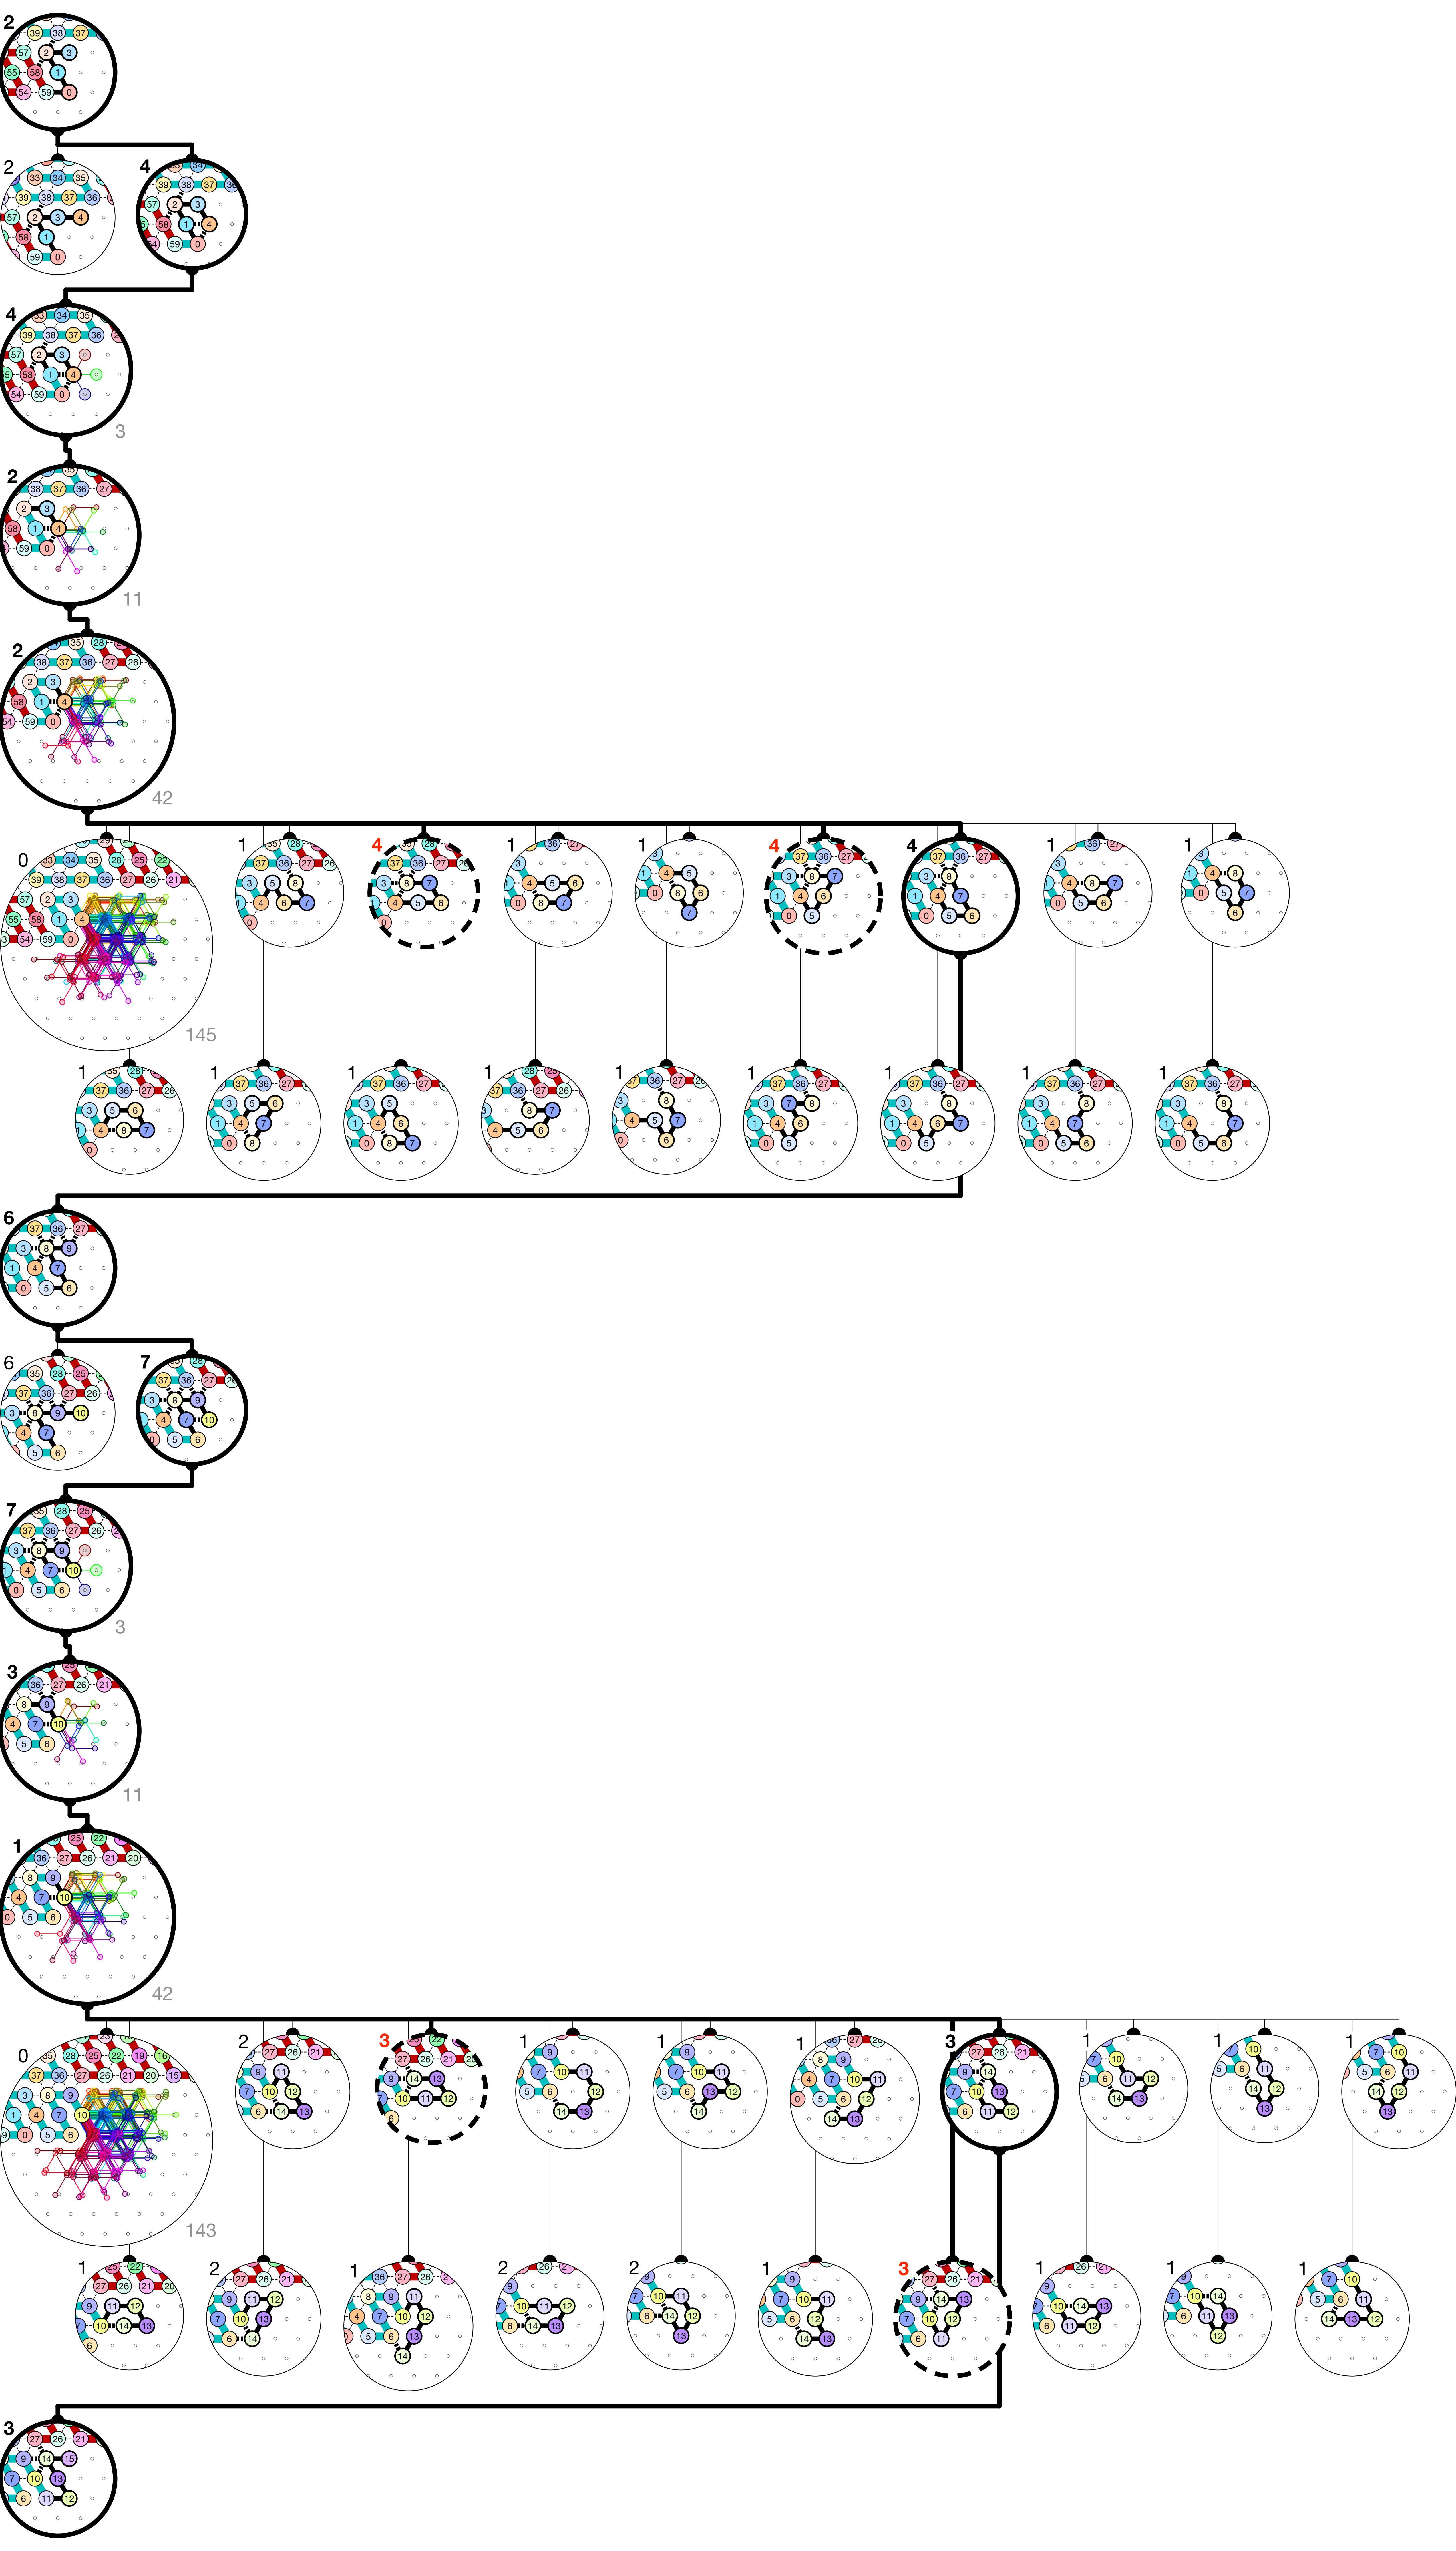

Supplement: s2 [file s2]

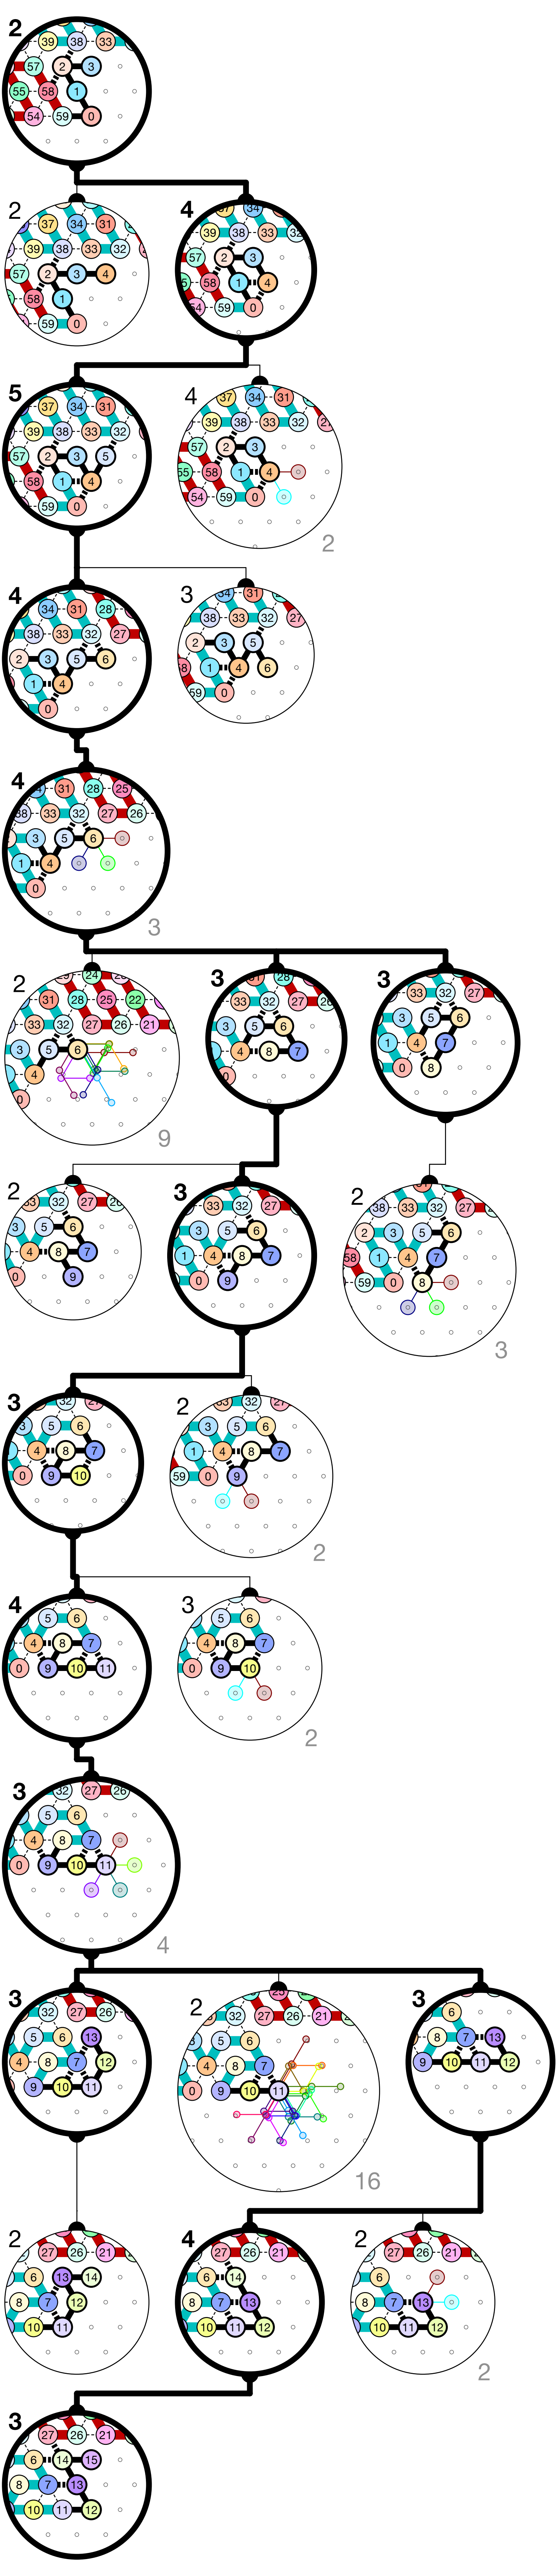

Supplement: s2 [file s2]

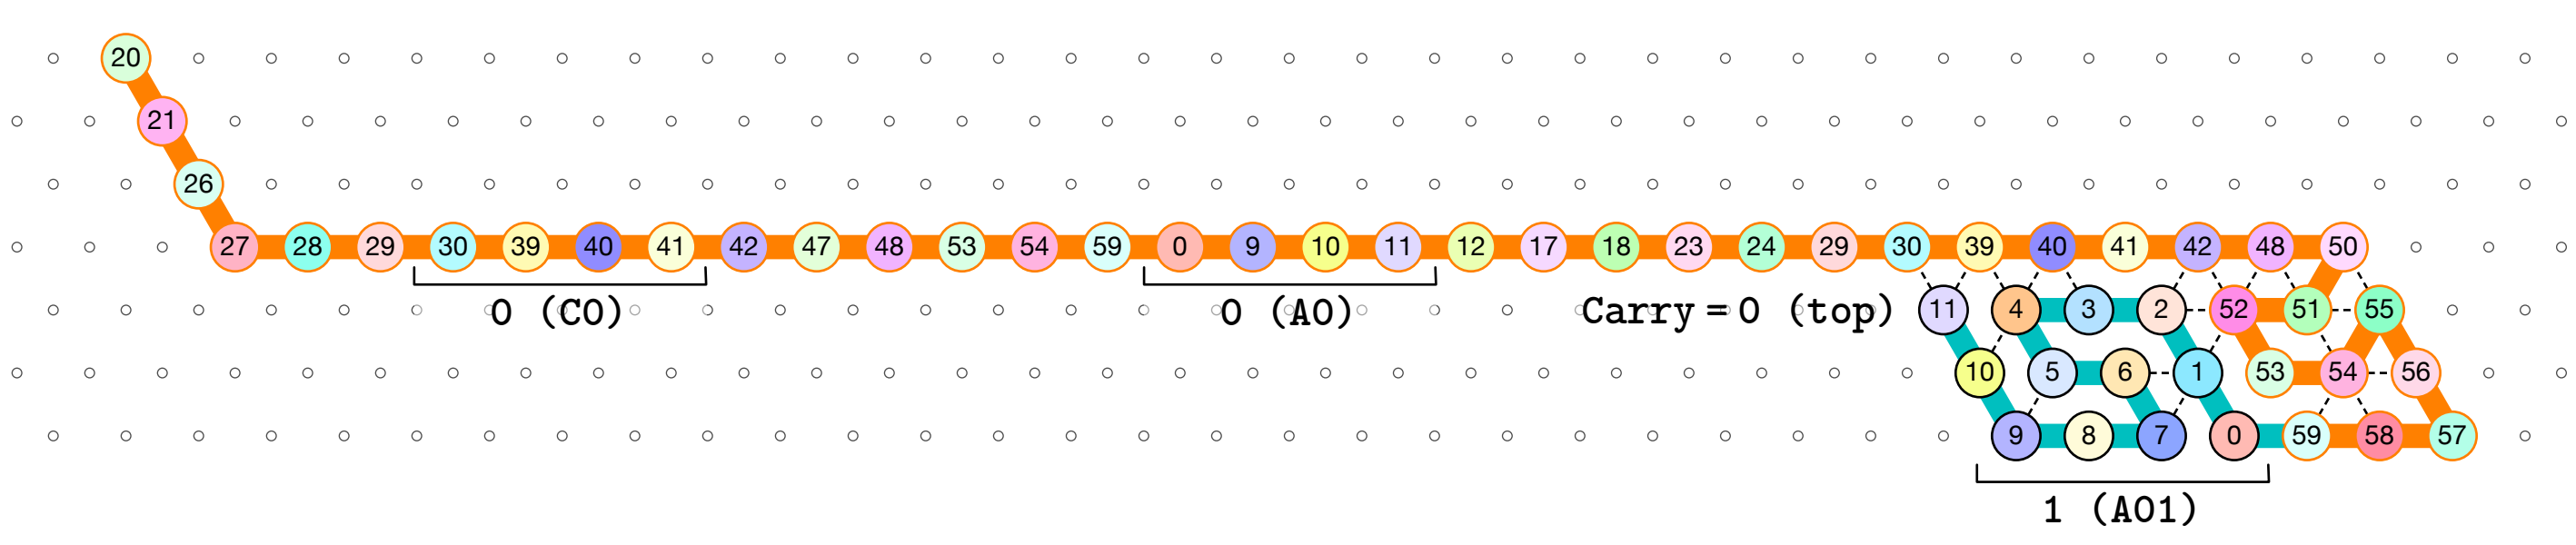

Supplement: s2 [file s2]

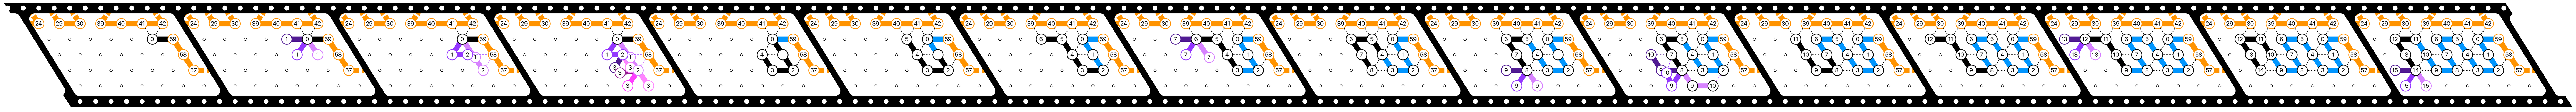

Supplement: s2 [file s2]



**Right  
Turn**

Supplement: s2 [file s2]

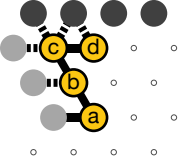

Supplement: s2 [file s2]

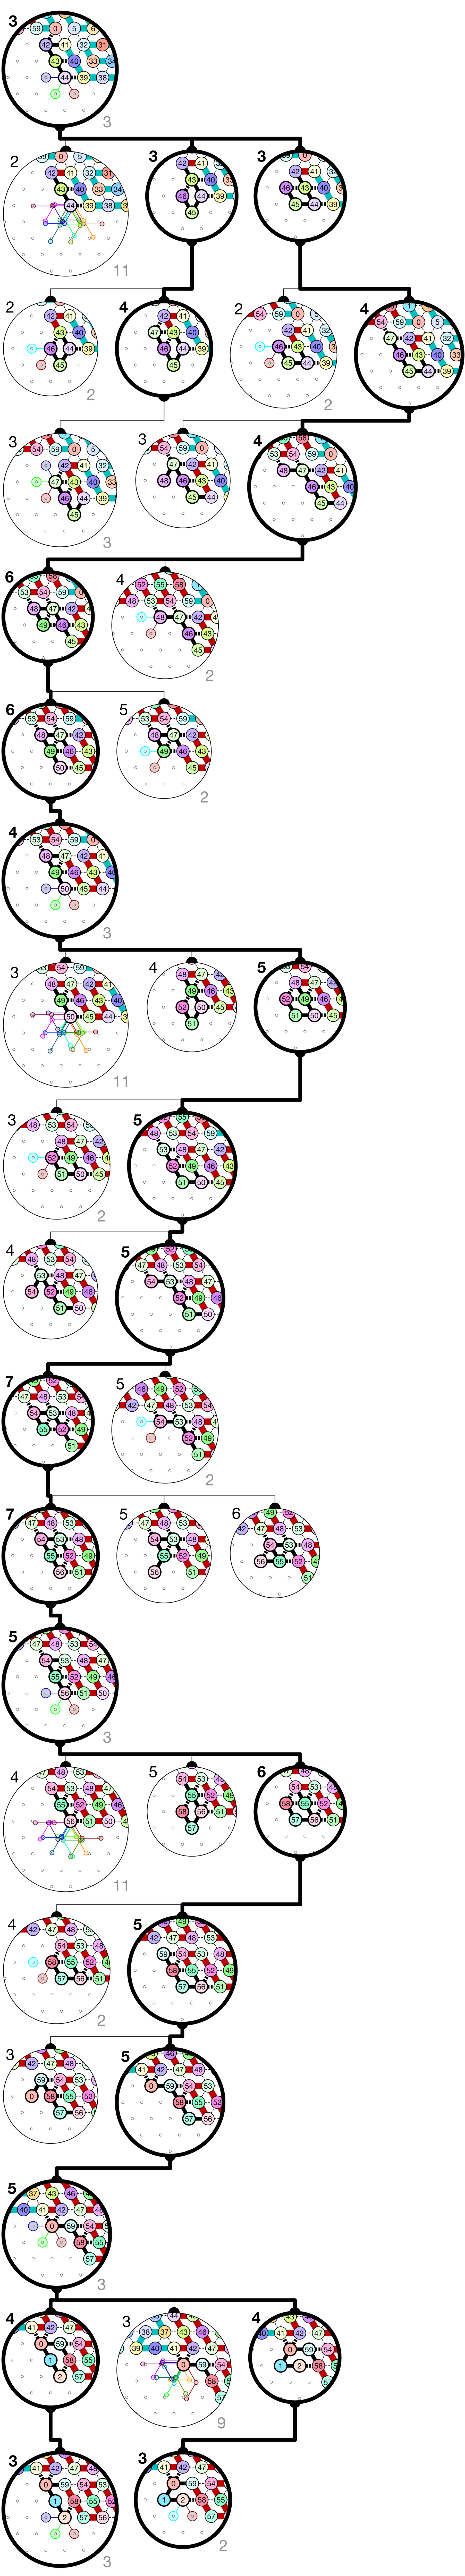

Supplement: s2 [file s2]

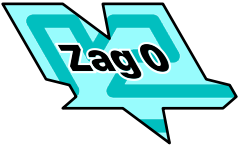

Supplement: s2 [file s2]

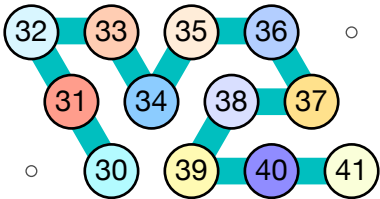

Supplement: s2 [file s2]

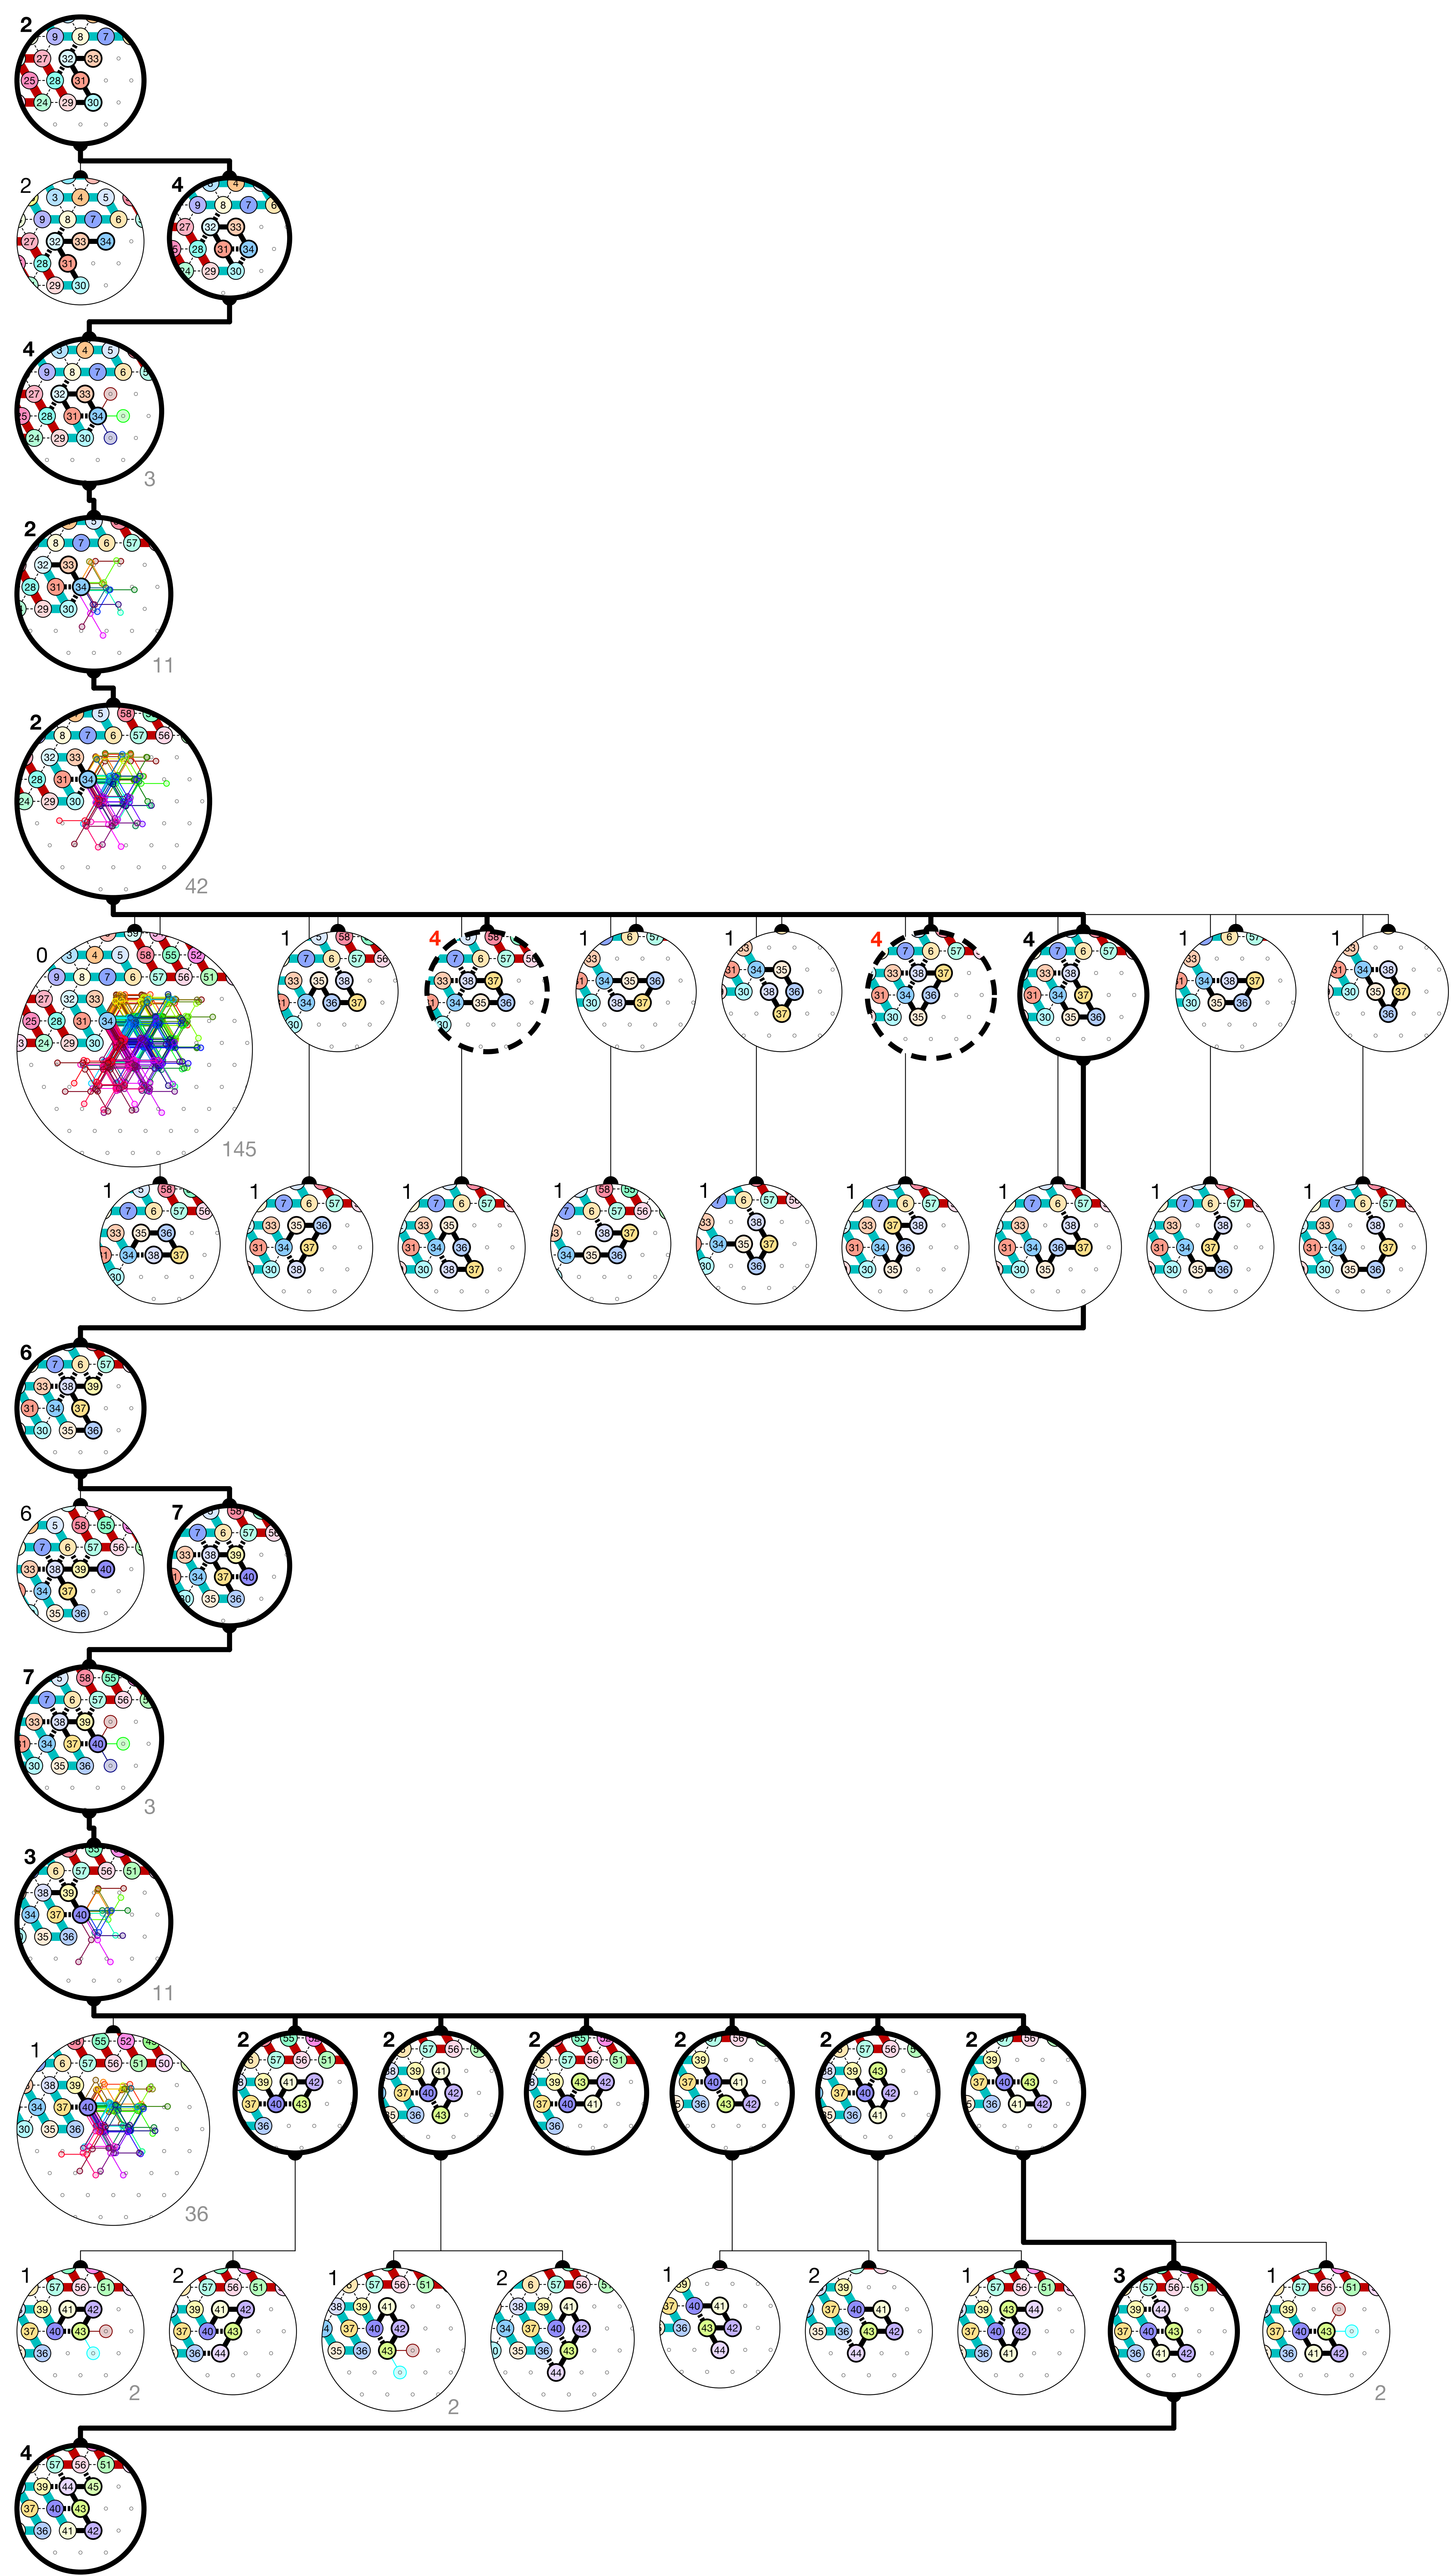

Supplement: s2 [file s2]

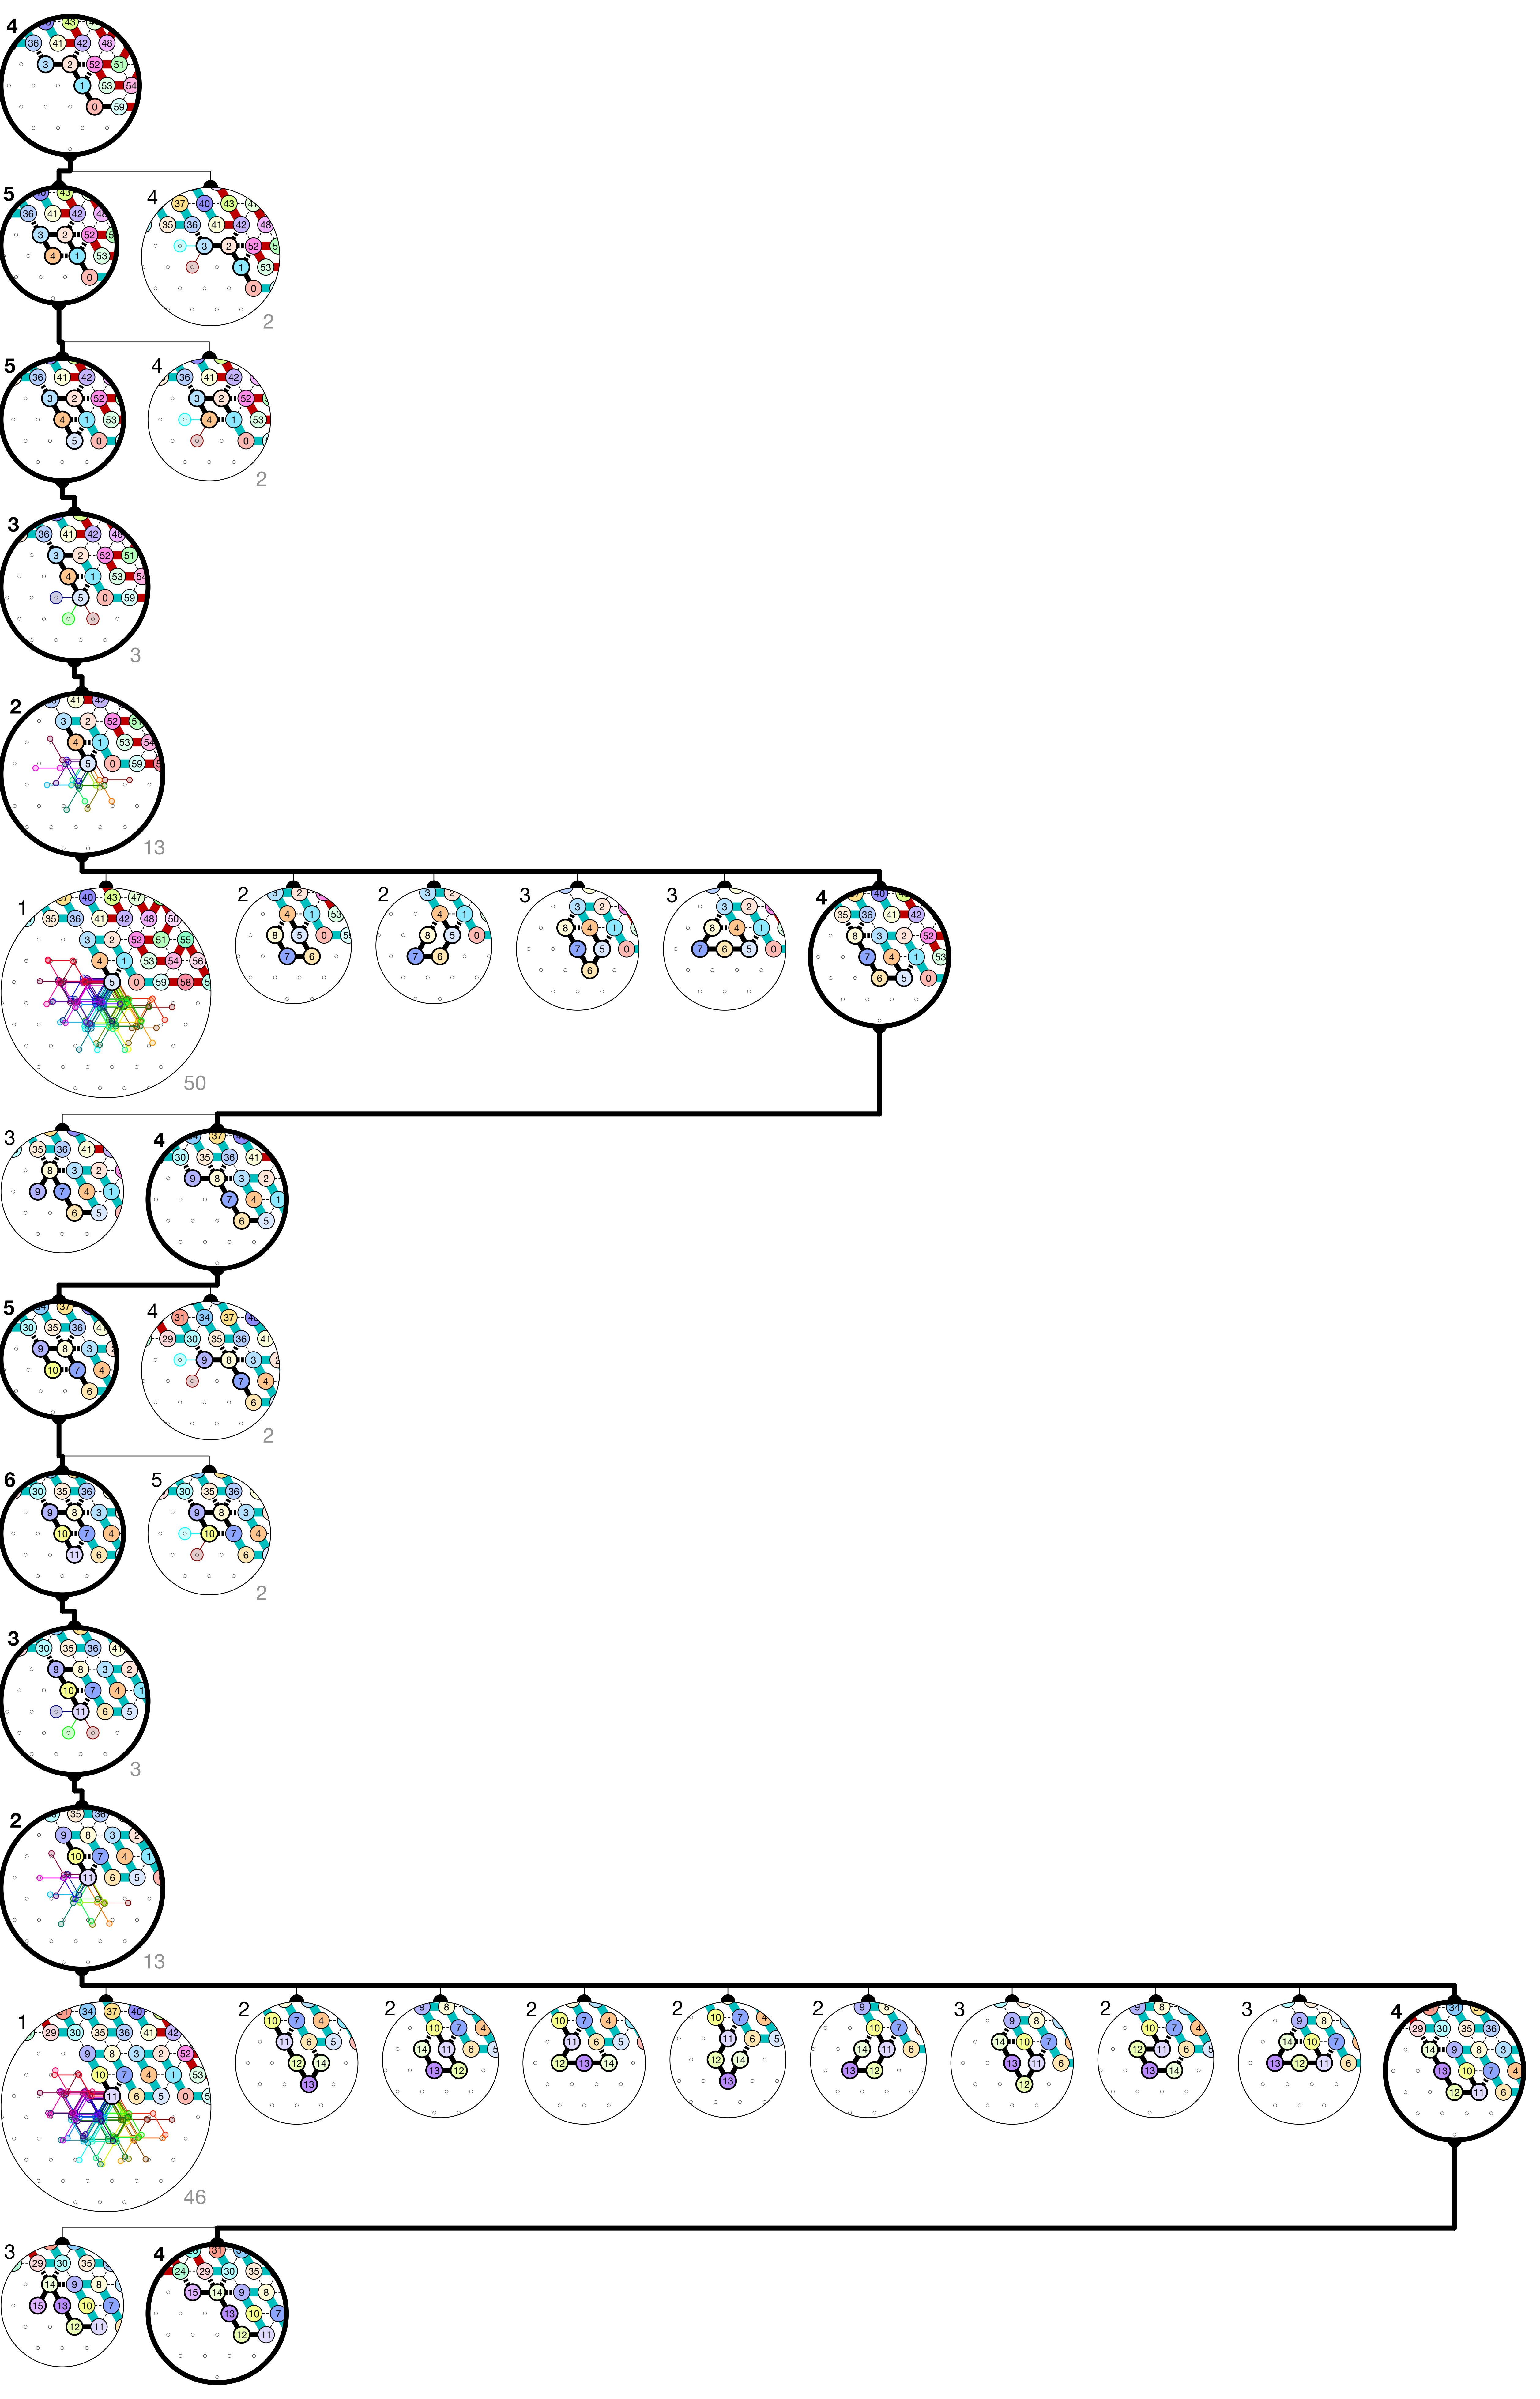

Supplement: s2 [file s2]

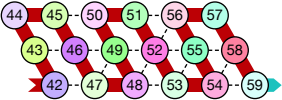

Supplement: s2 [file s2]

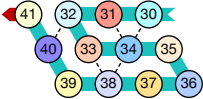

Supplement: s2 [file s2]

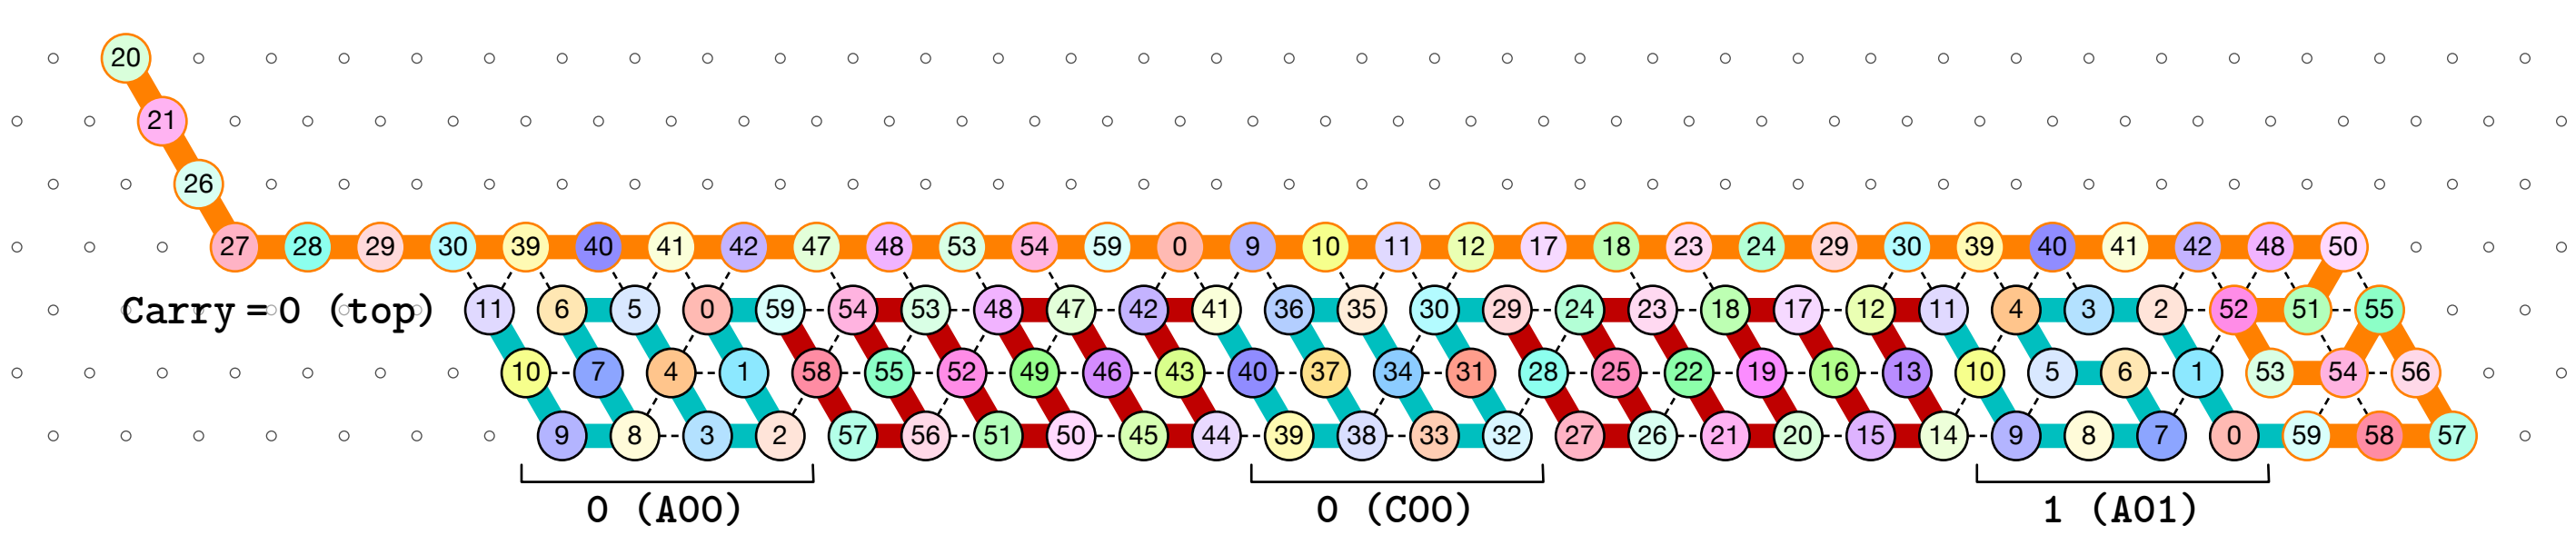

Supplement: s2 [file s2]

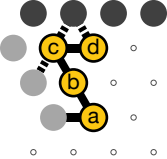

Supplement: s2 [file s2]

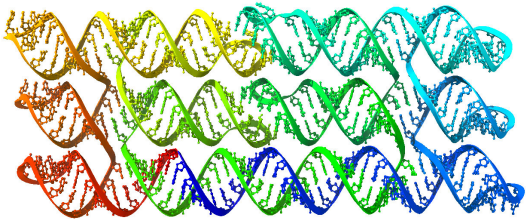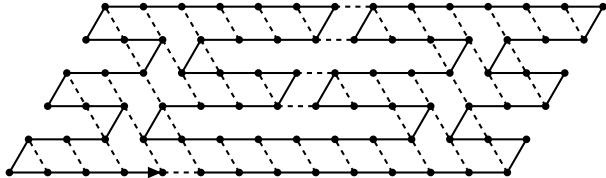

Supplement: s2 [file s2]

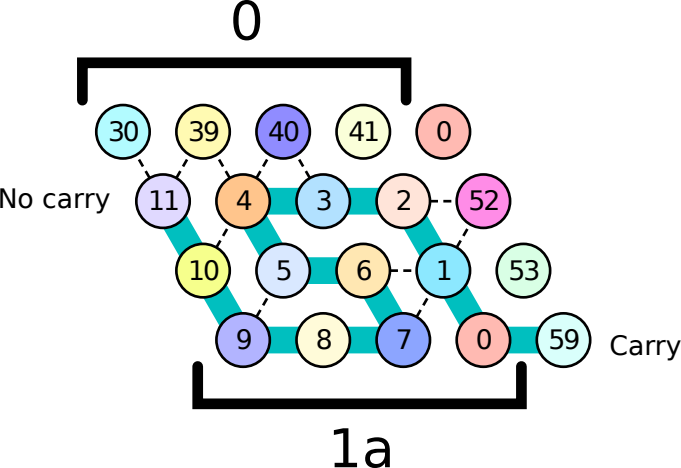

Supplement: s2 [file s2]

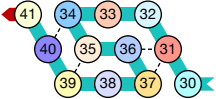

Supplement: s2 [file s2]

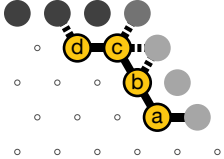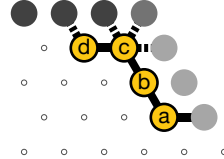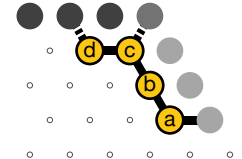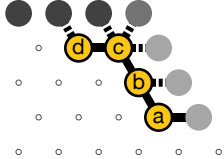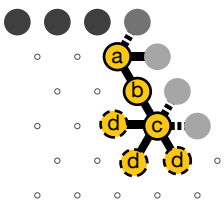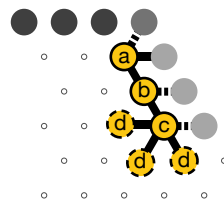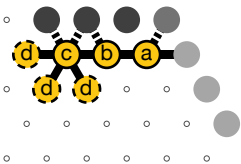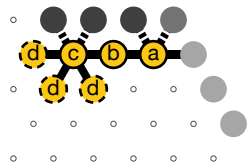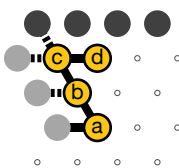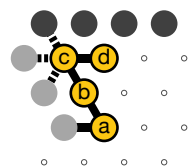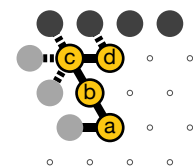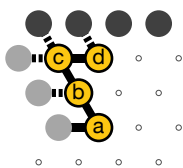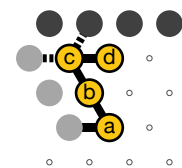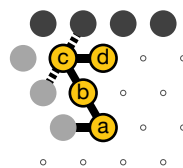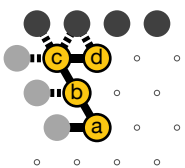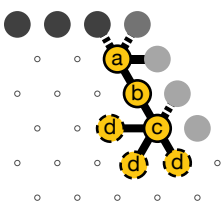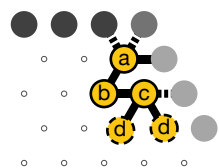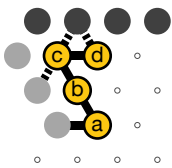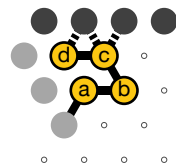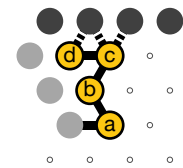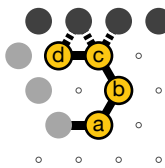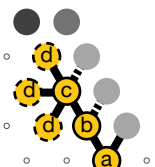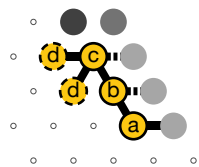

Supplement: s2 [file s2]

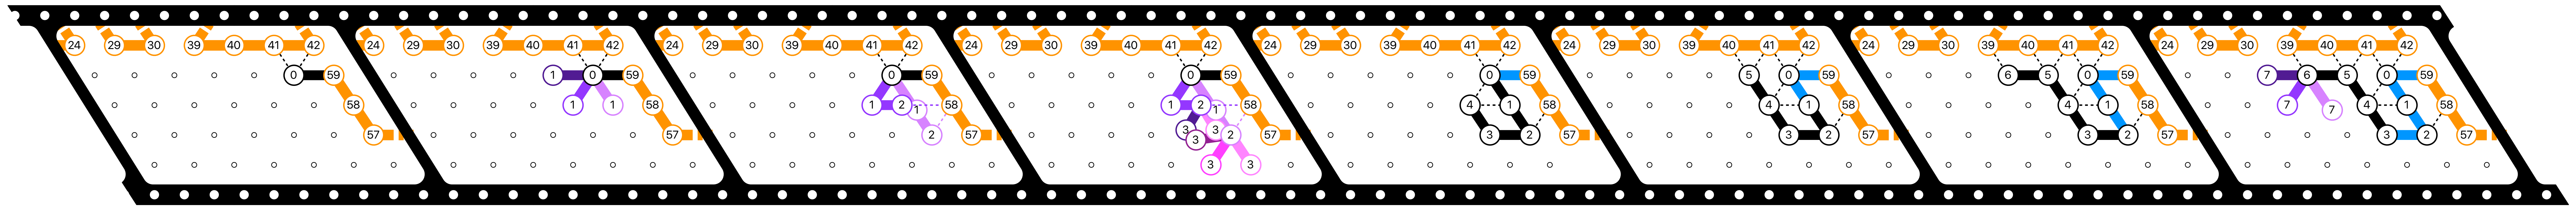

Supplement: s2 [file s2]

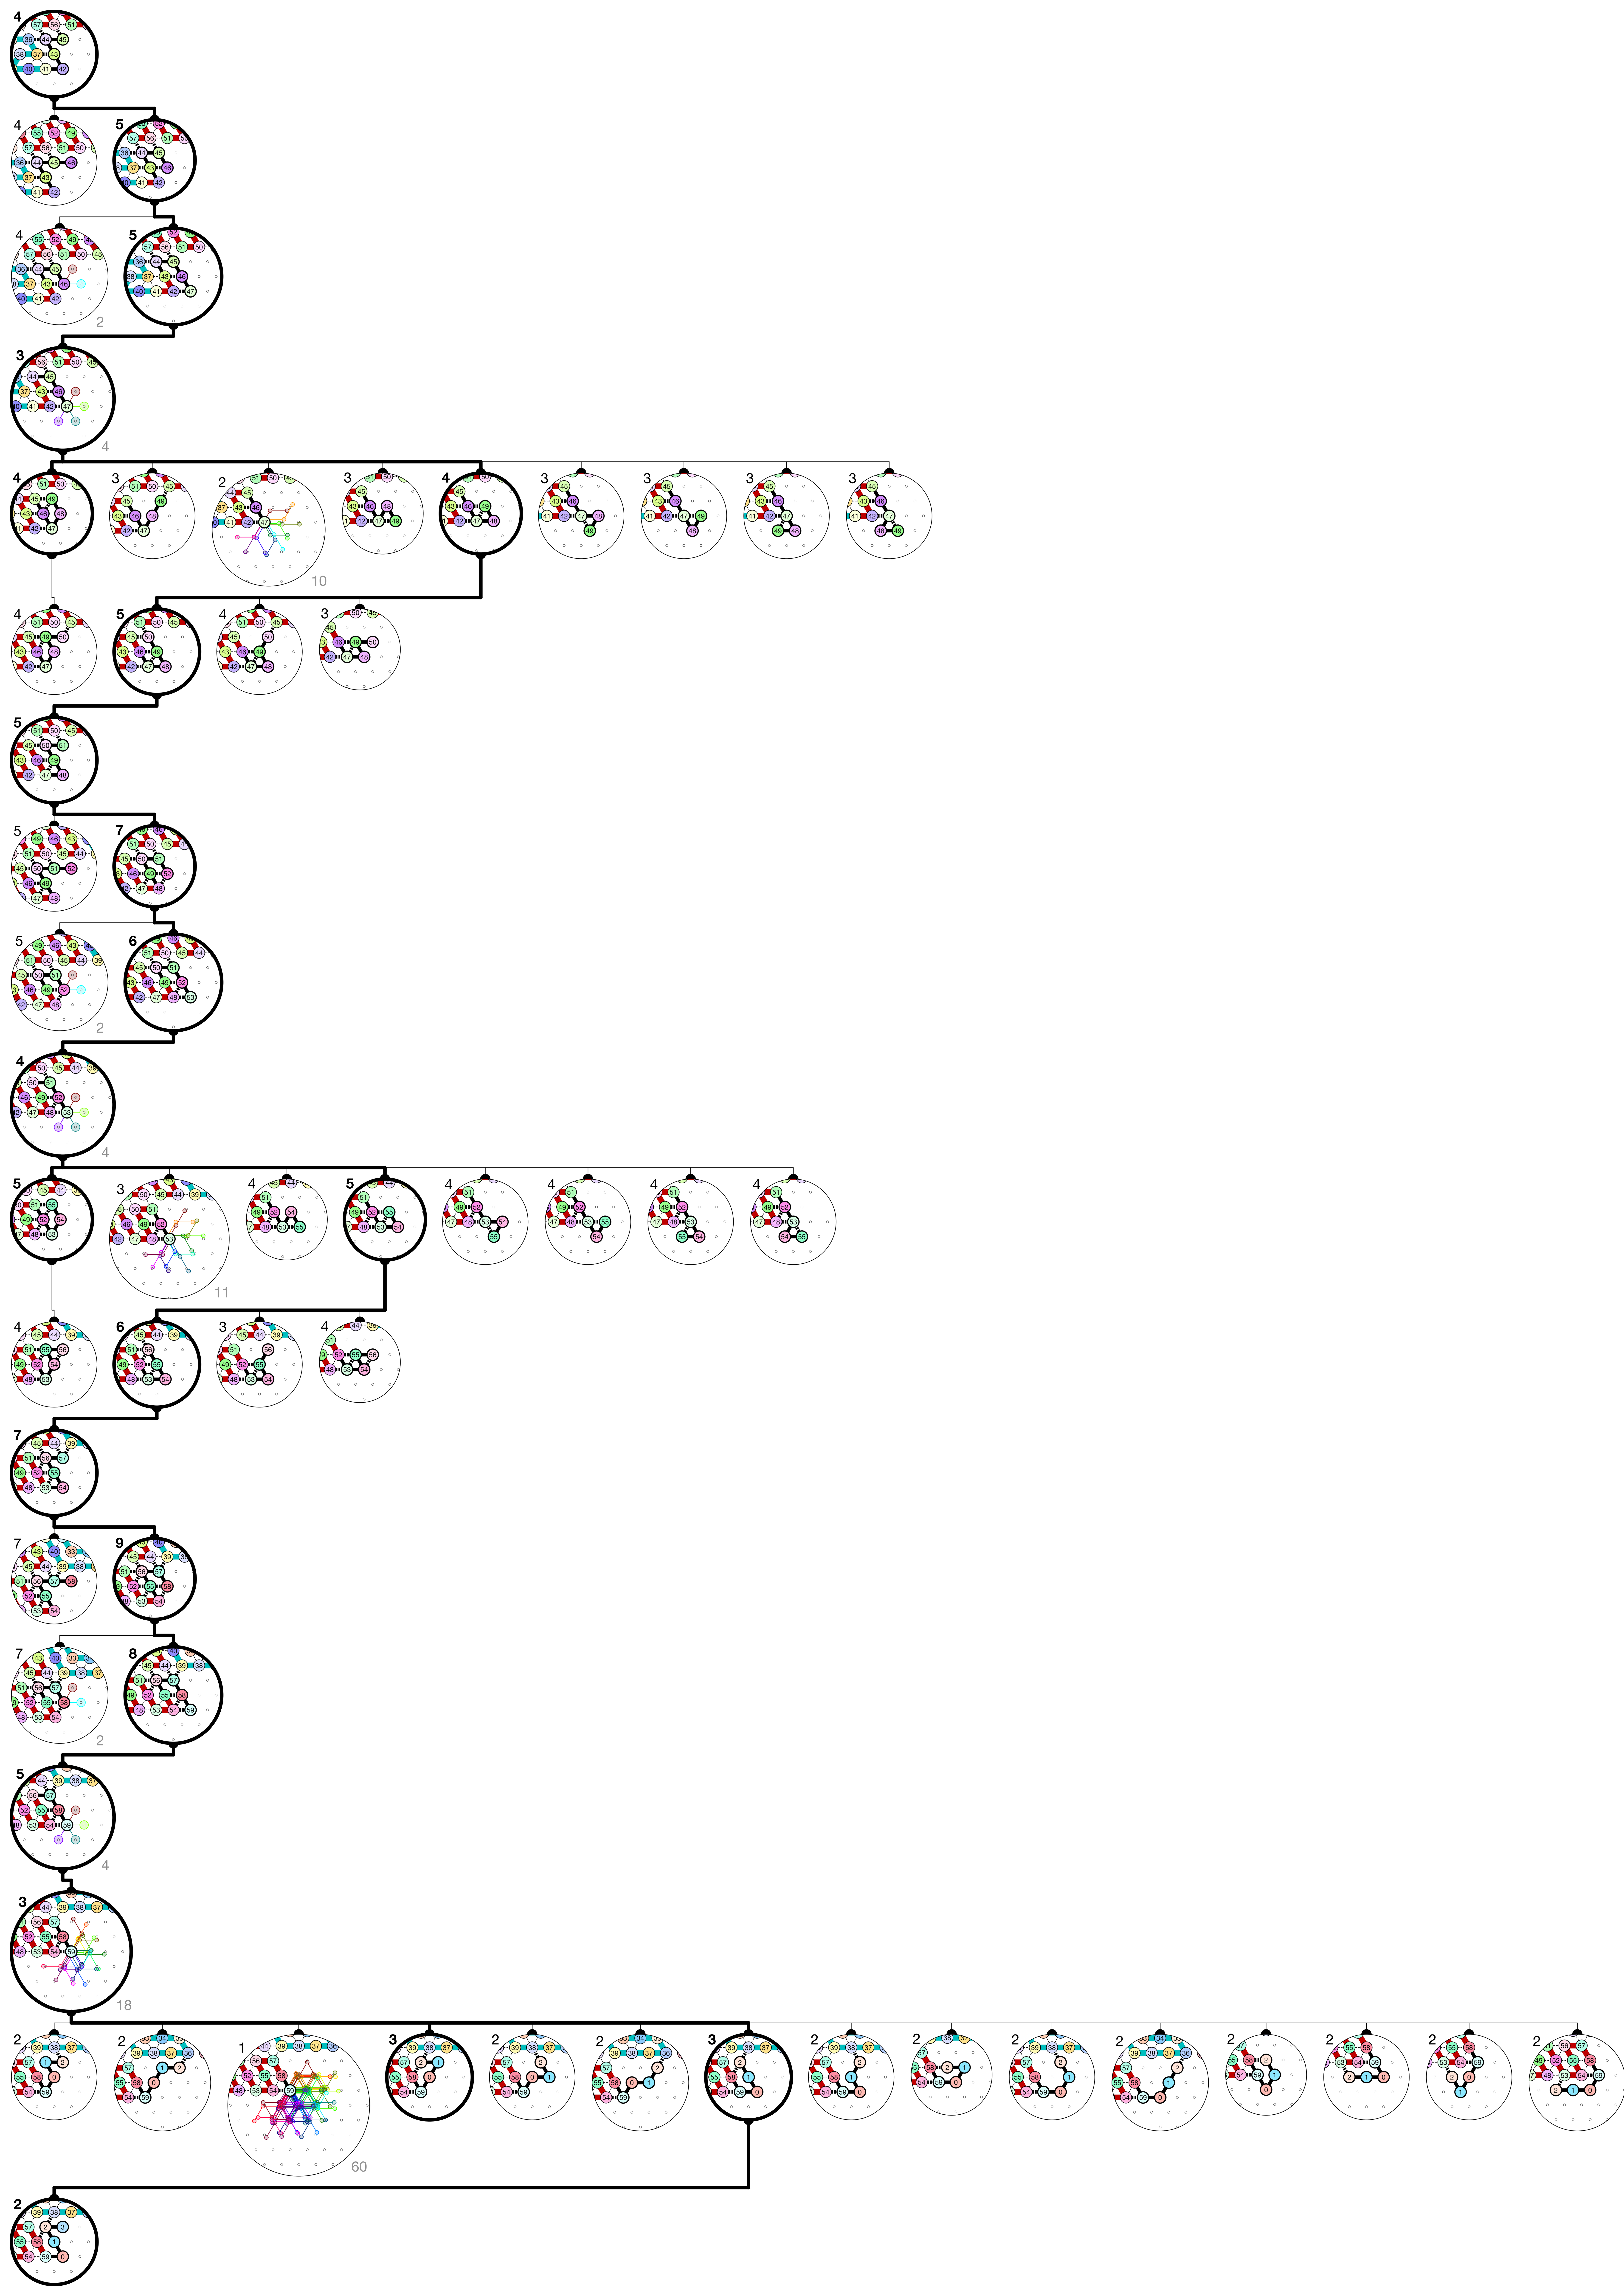

Supplement: s2 [file s2]

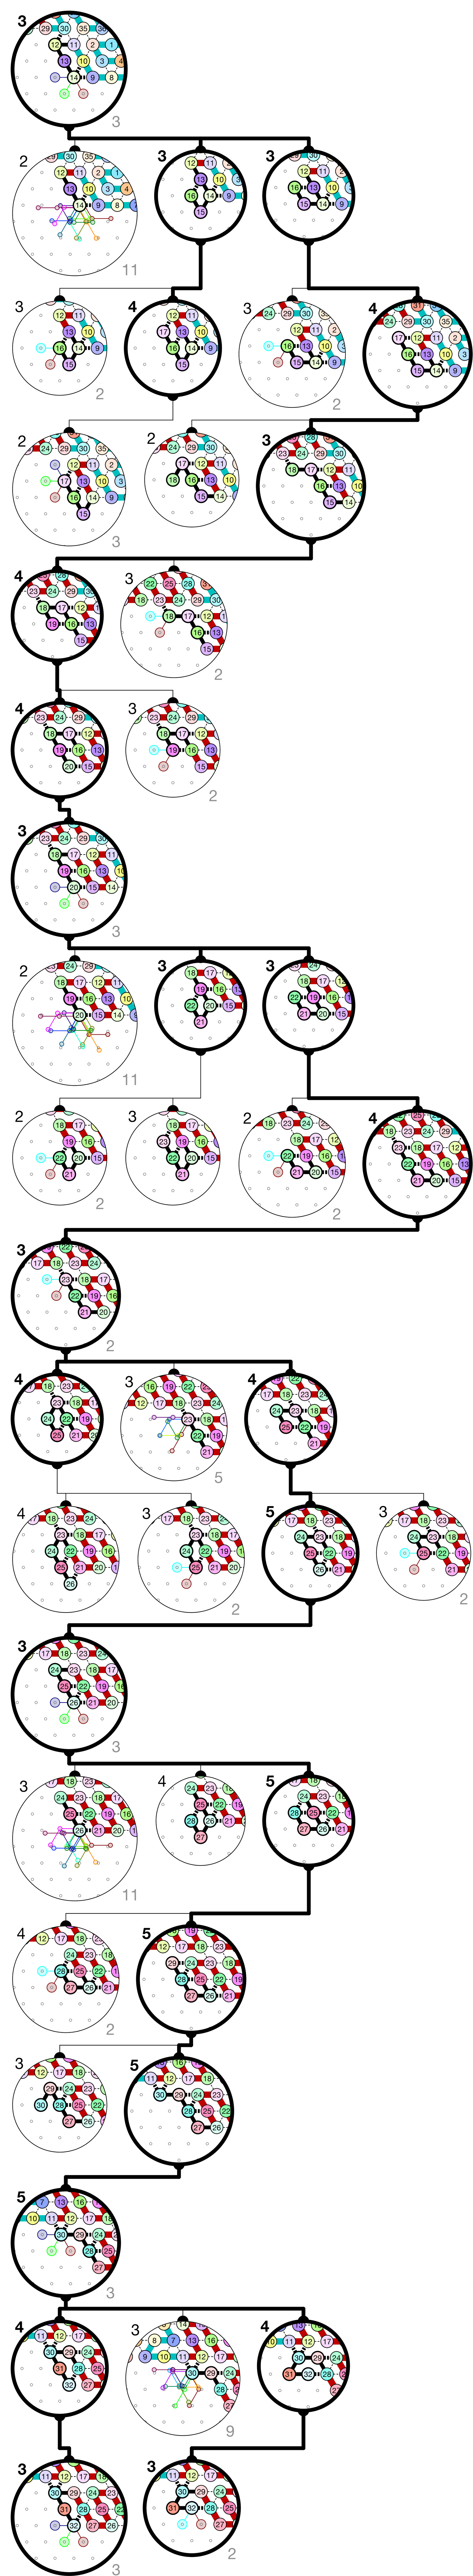

Supplement: s2 [file s2]

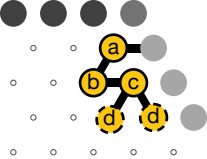

Supplement: s2 [file s2]

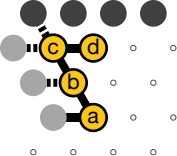

Supplement: s2 [file s2]

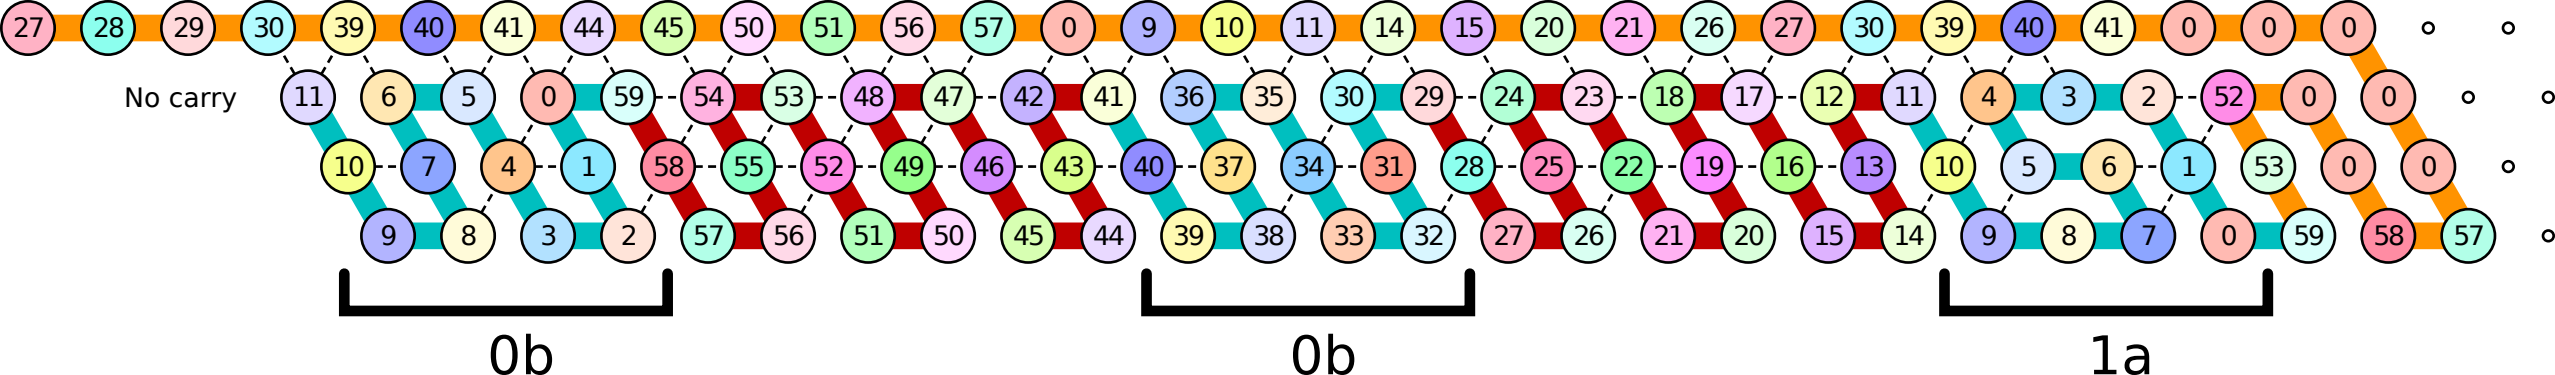

Supplement: s2 [file s2]

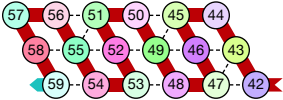

Supplement: s2 [file s2]

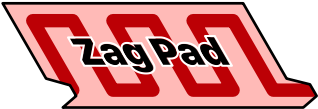

Supplement: s2 [file s2]

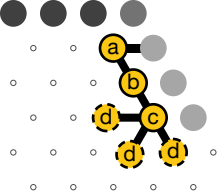

Supplement: s2 [file s2]

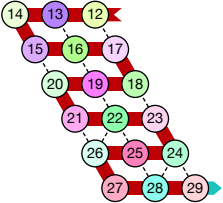

Supplement: s2 [file s2]

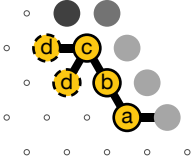

Supplement: s2 [file s2]

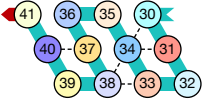

Supplement: s2 [file s2]

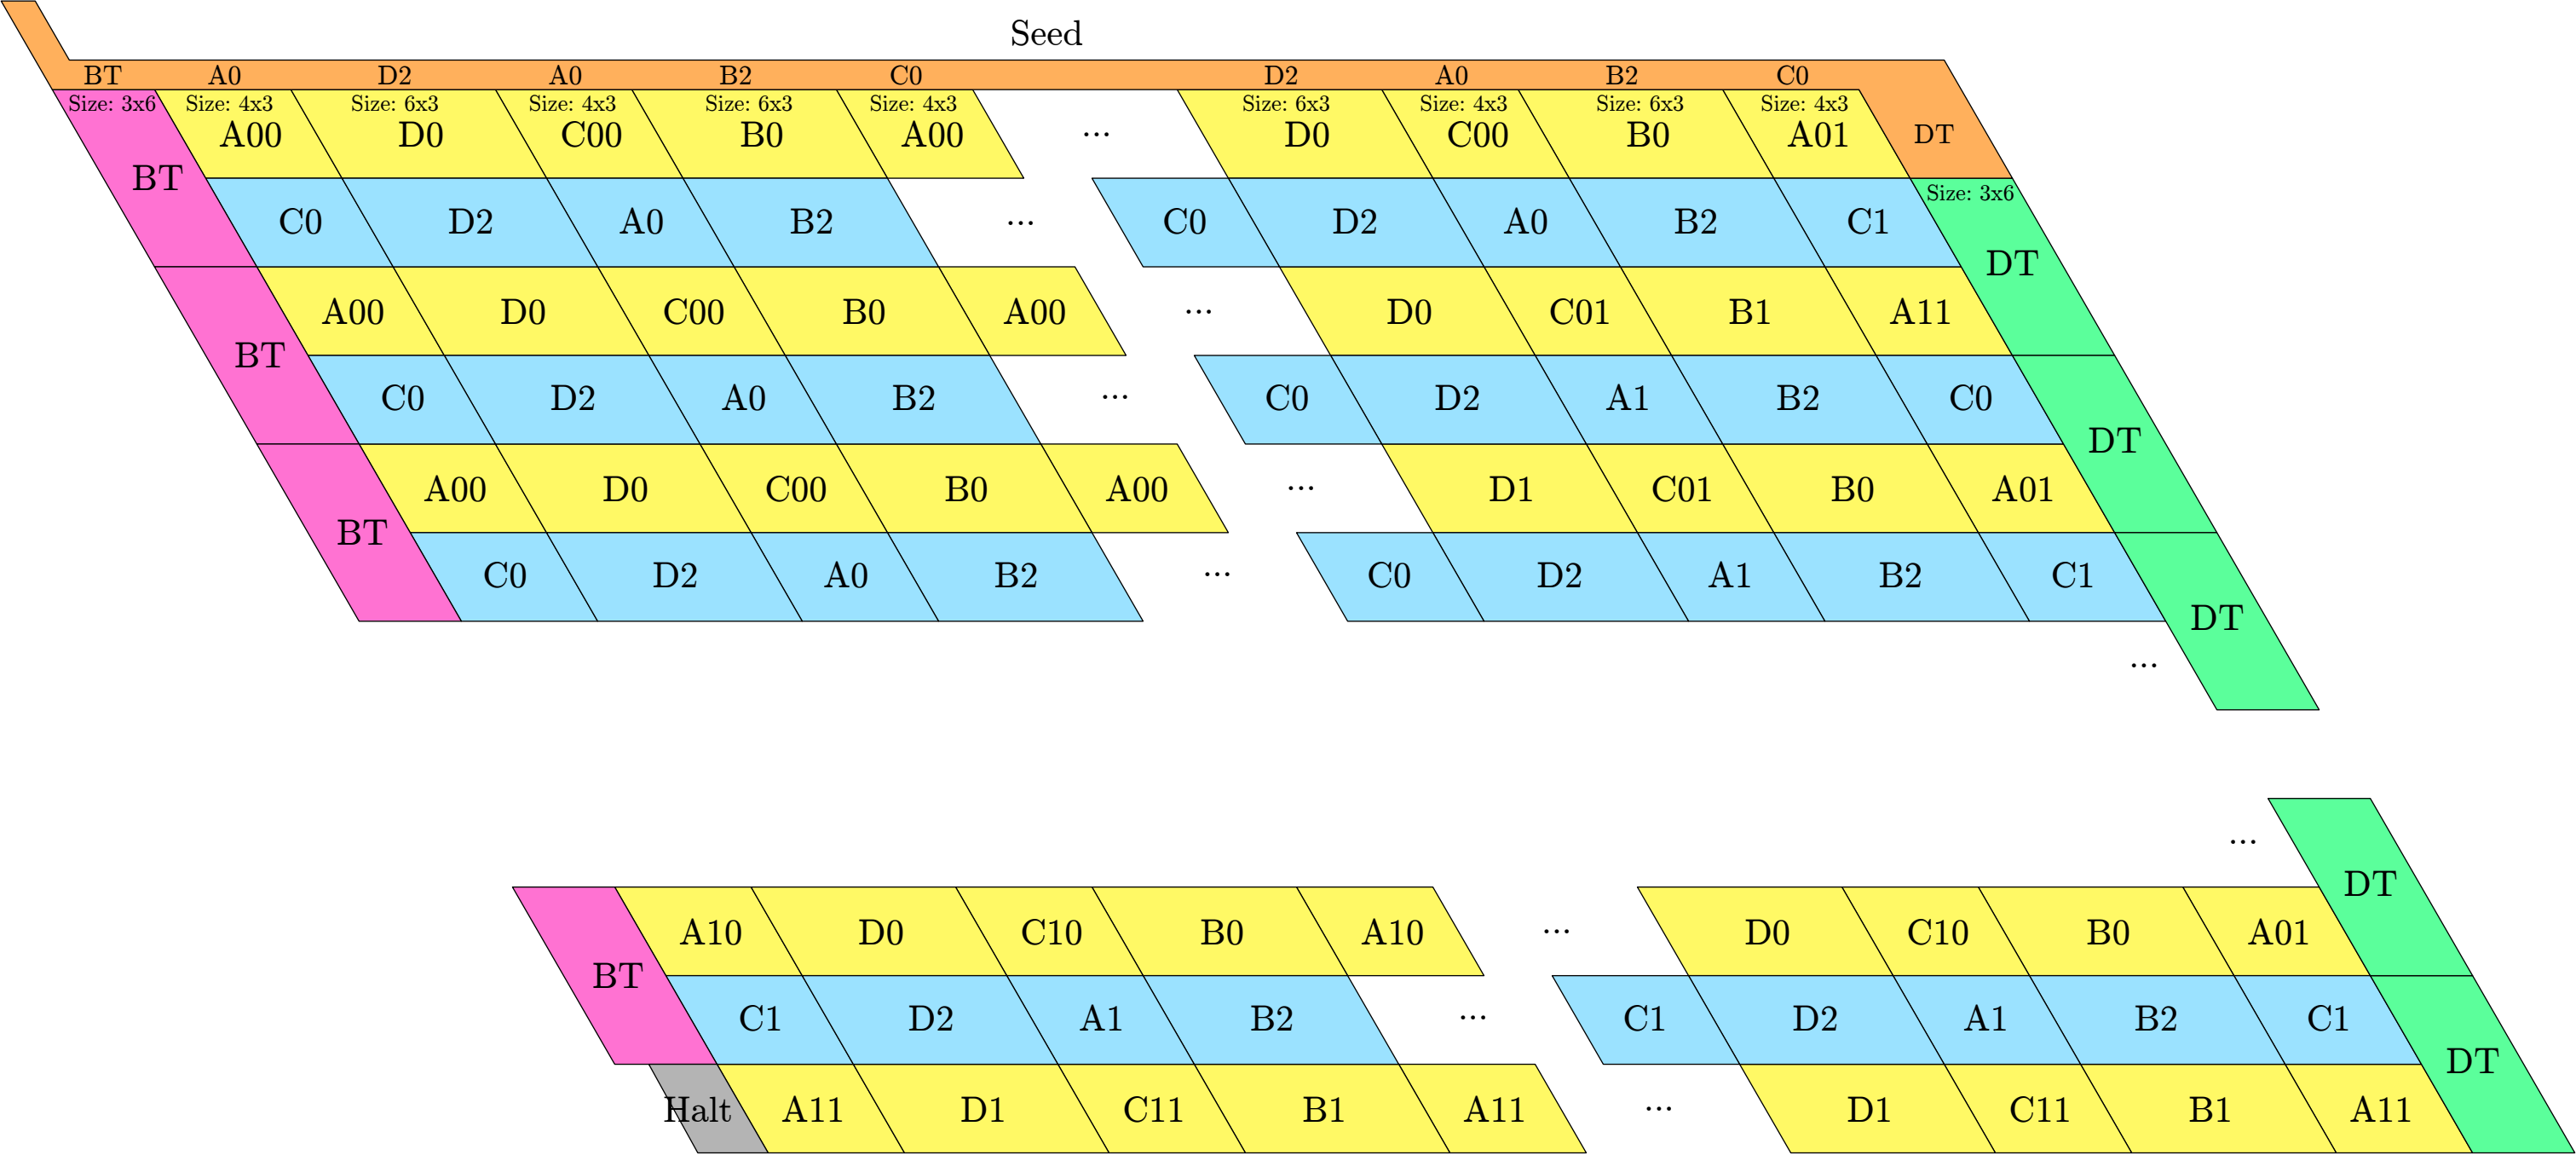

Supplement: s2 [file s2]

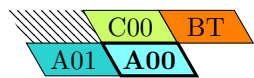

Supplement: s2 [file s2]

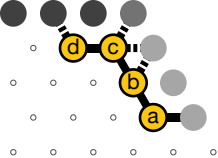

Supplement: s2 [file s2]

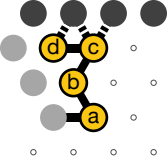

Supplement: s2 [file s2]

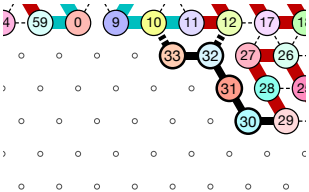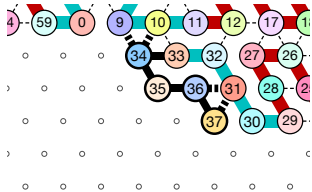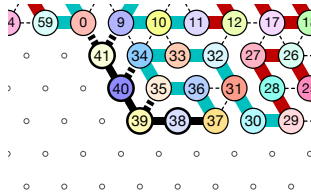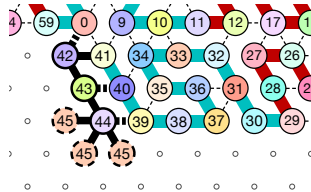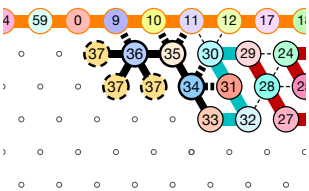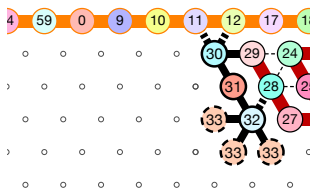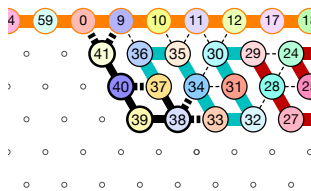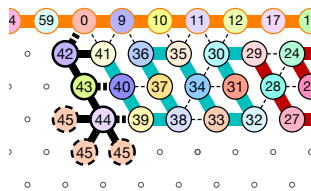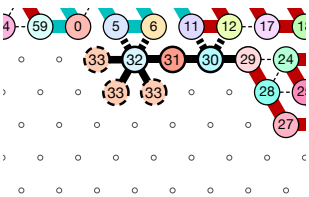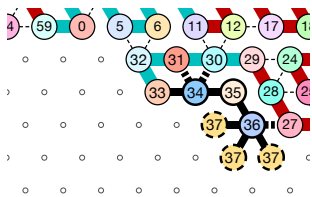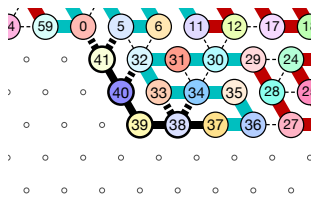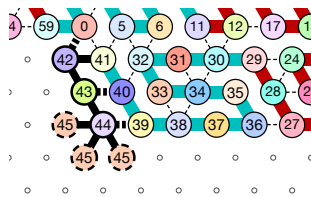

Supplement: s2 [file s2]

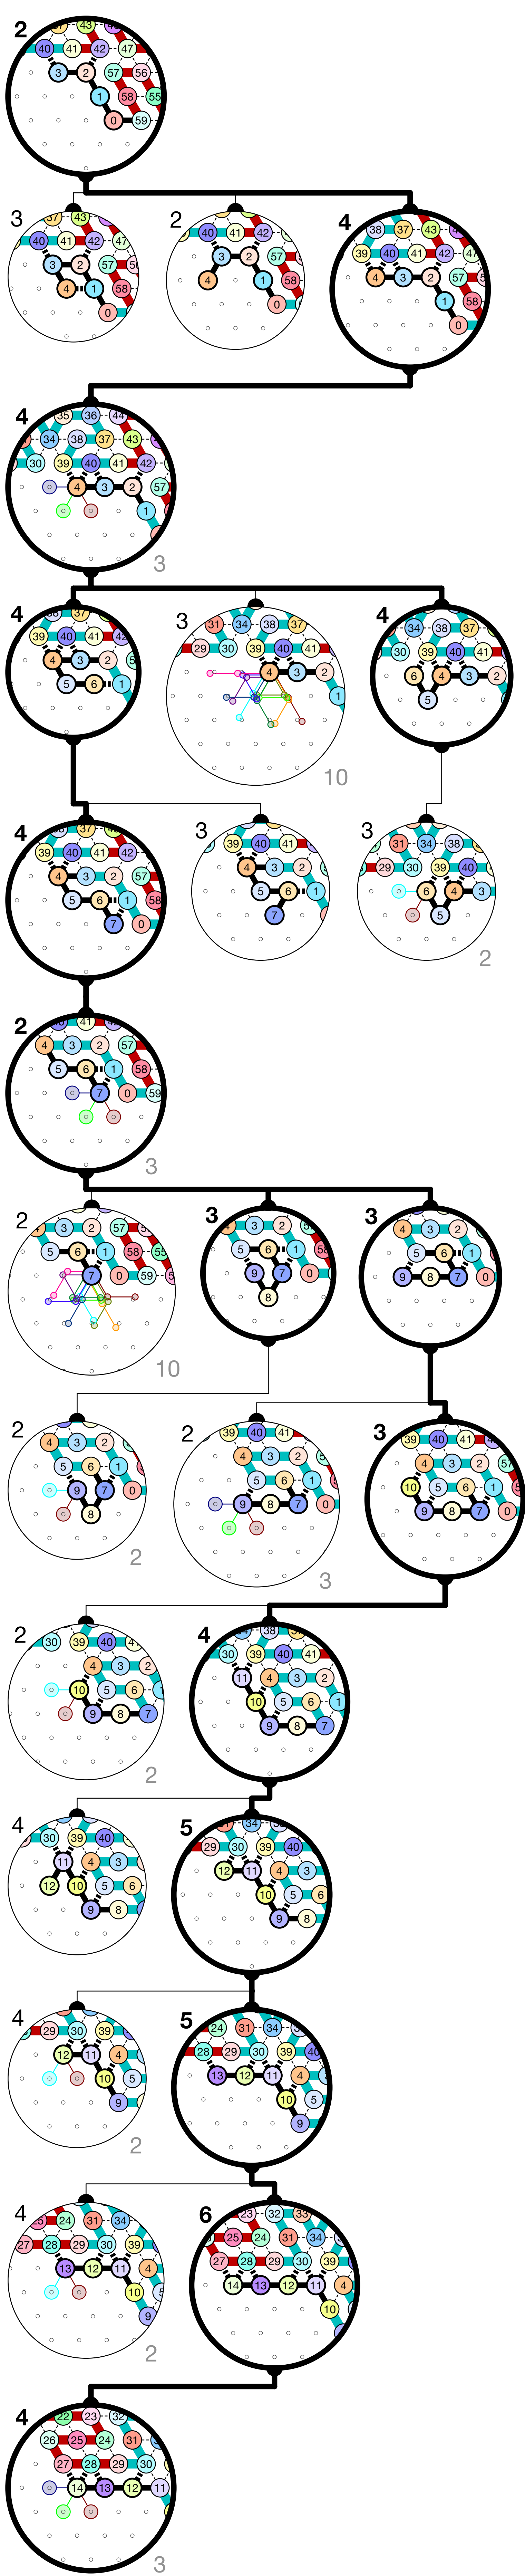

Supplement: s2 [file s2]

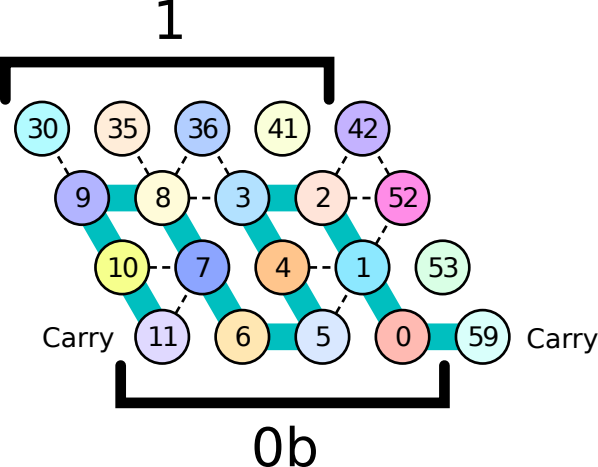

Supplement: s2 [file s2]

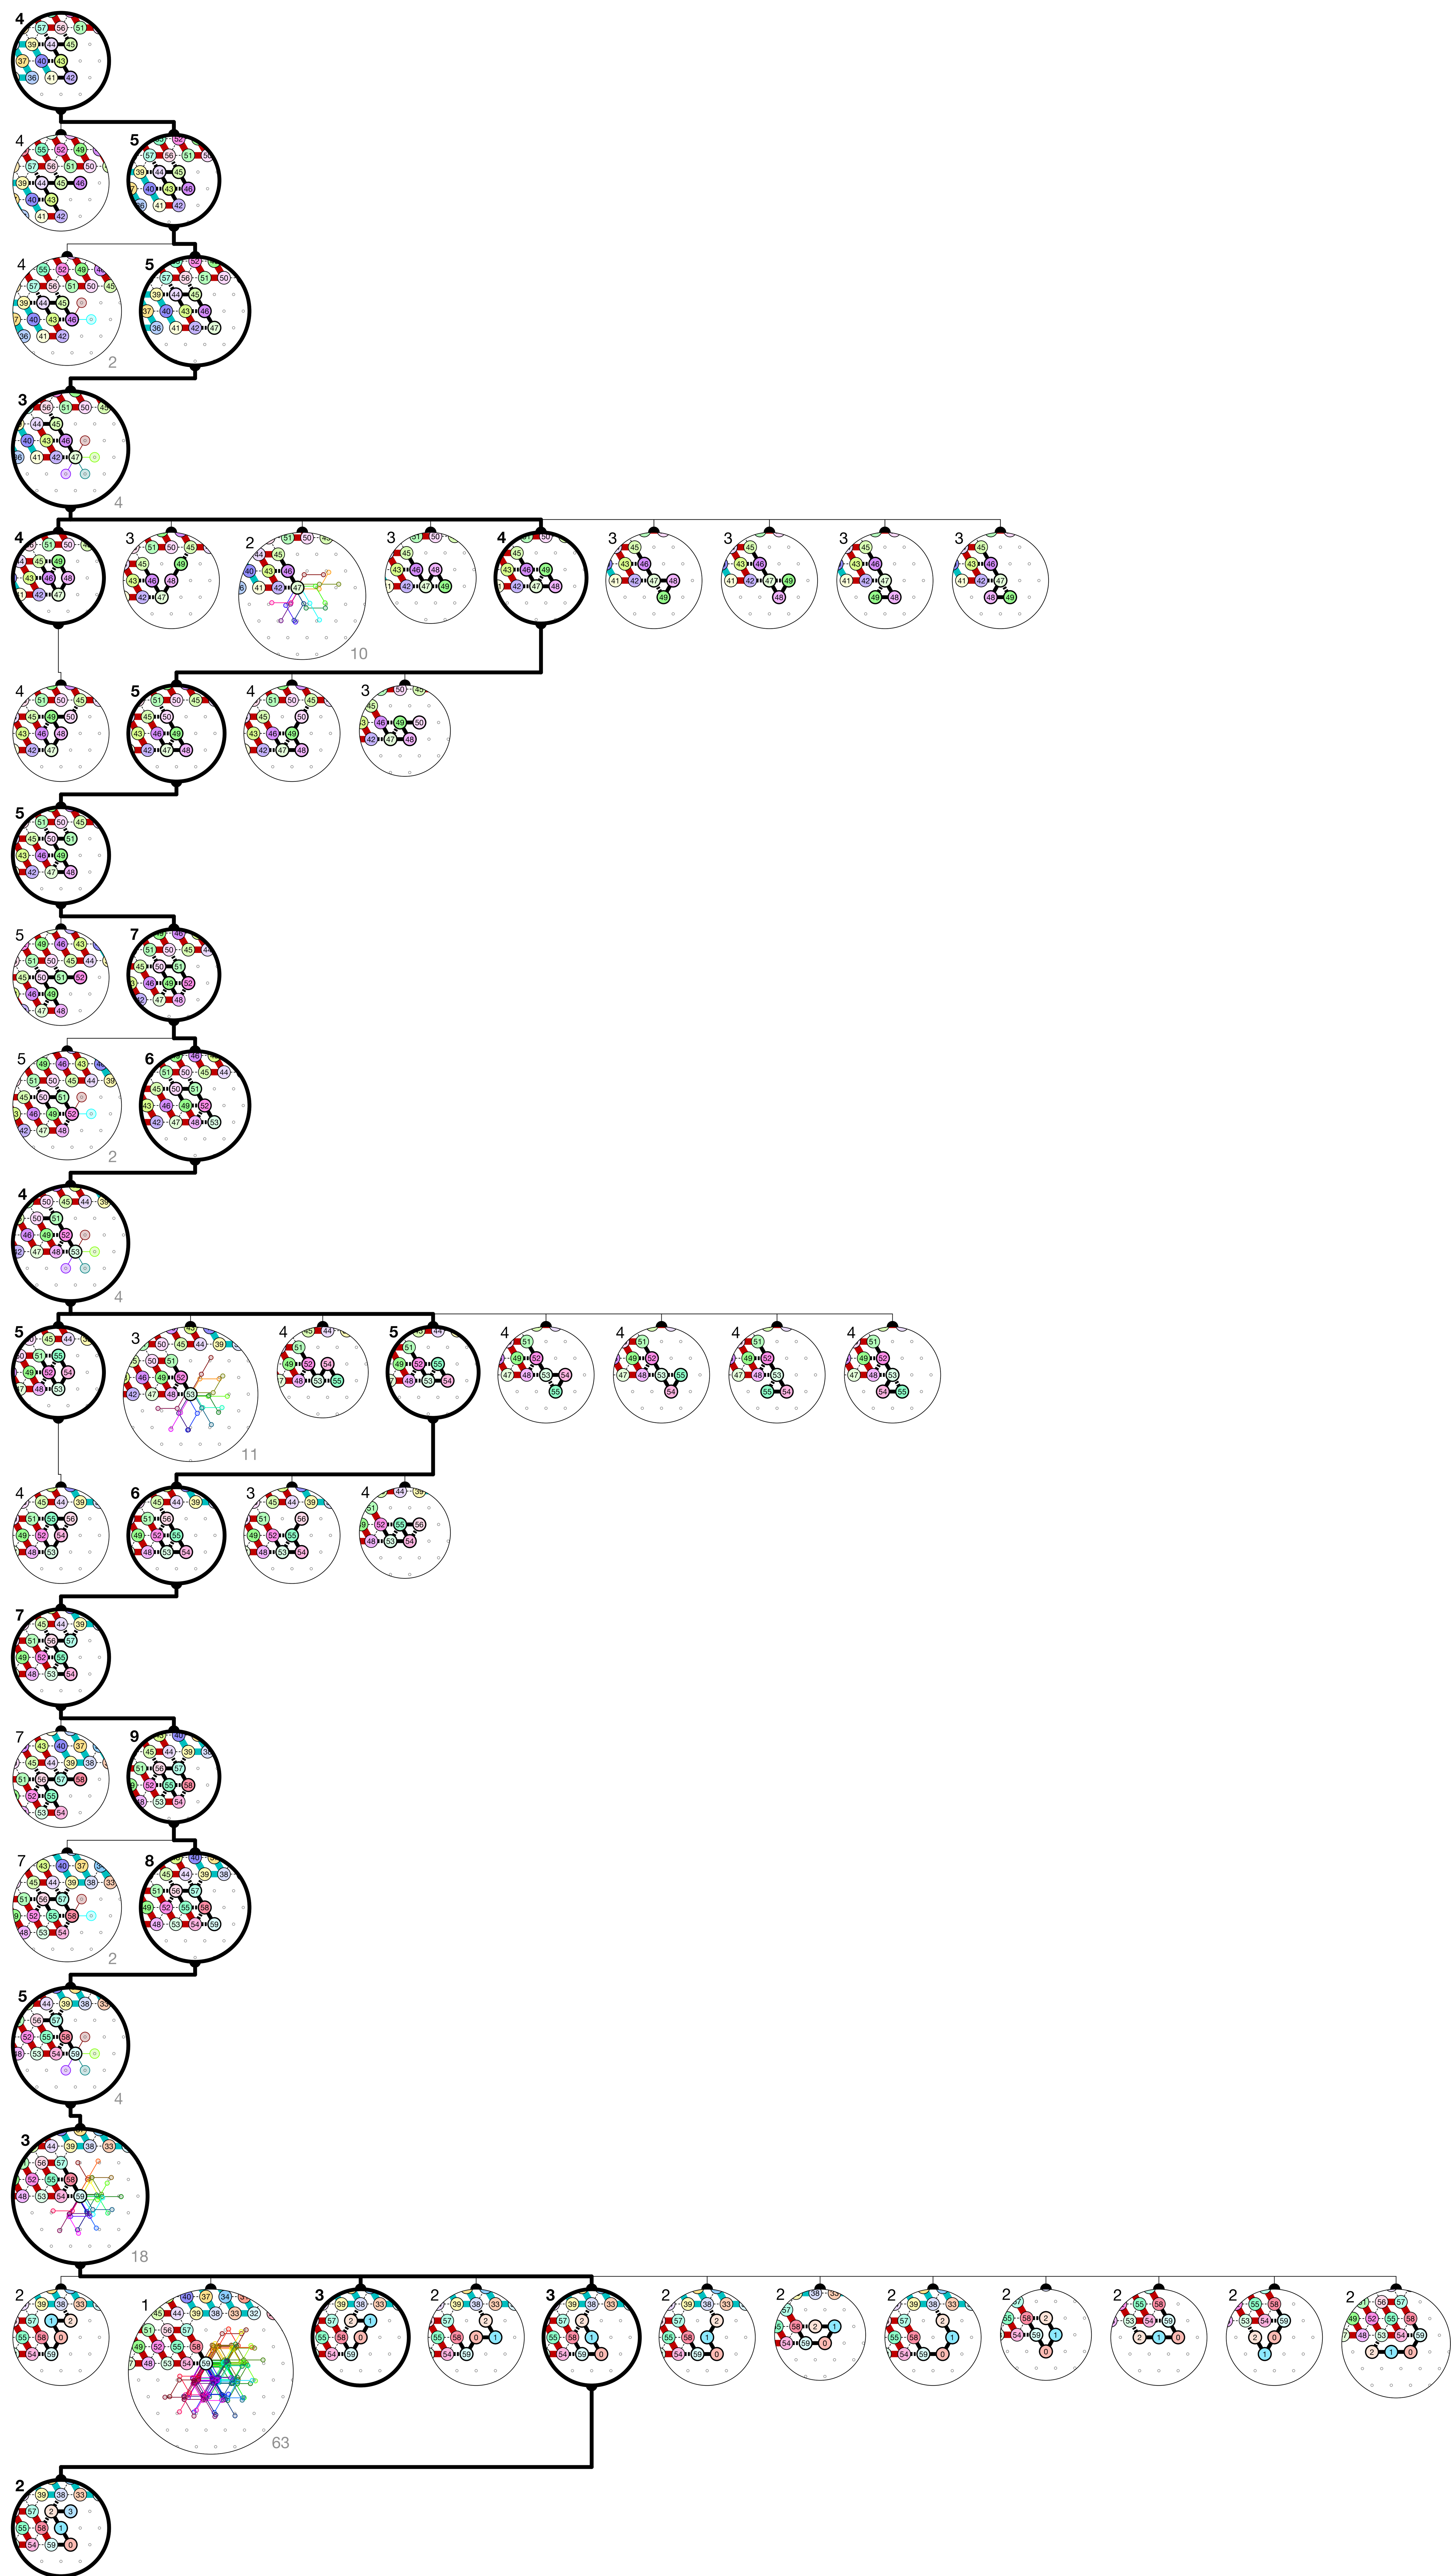

Supplement: s2 [file s2]

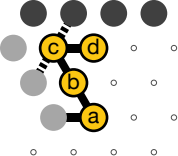

Supplement: s2 [file s2]

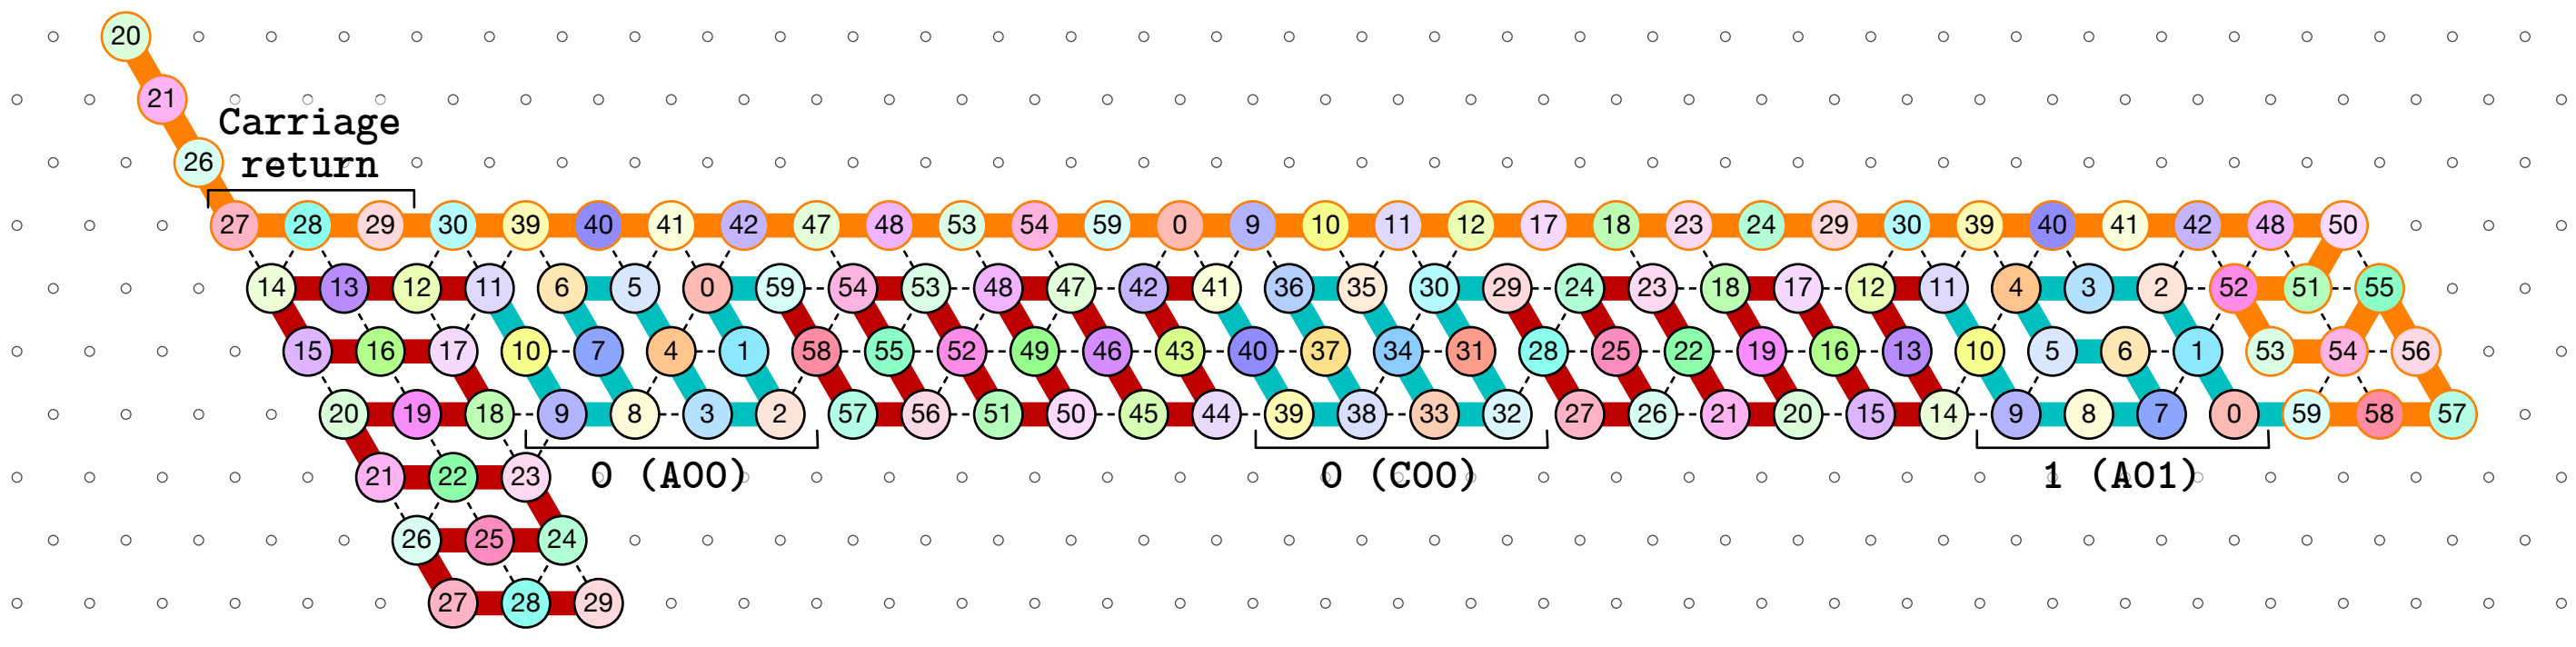

Supplement: s2 [file s2]

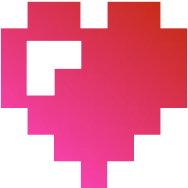

Supplement: s2 [file s2]

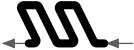

Supplement: s2 [file s2]
